# Supplementary material for: Exploiting a Y chromosome-linked Cas9 for sex selection and gene drive
Source: Nat Commun. 2021 Dec 10;12:7202. doi: 10.1038/s41467-021-27333-1 (PMC8664916; doi:10.1038/s41467-021-27333-1)
Supplement: Supplementary file 7 — Supplementary Data File 3 [file 41467_2021_27333_MOESM7_ESM.xlsx]

## Sheet: Sheet1
id	baseMean	log2FoldChange	lfcSE	stat	pvalue	padj	GeneName	GeneBiotype	GO_term	GO_name	GeneSnapshot	Name	Symbol	UniprotFunction	UniprotDomains	SubunitStructure	Pathway
FBgn0040099	209.129	4.35537	0.325865	13.3656	9.6065e-41	1.44232e-36	lectin-28C	protein_coding	GO:0030246|GO:0004888|GO:0005534|GO:0030246|GO:0004888|GO:0005534	carbohydrate binding|transmembrane signaling receptor activity|galactose binding|carbohydrate binding|transmembrane signaling receptor activity|galactose binding	Insufficient genetic data for FlyBase to solicit a summary. [Date last reviewed: 2016-06-30]	lectin-28C	lectin-28C	-	-	-	-
FBgn0266455	1477.5	2.34383	0.180728	12.9688	1.83821e-38	1.37995e-34	CG45080	protein_coding	GO:0003674|GO:0008150|GO:0005575	molecular_function|biological_process|cellular_component	Insufficient genetic data for FlyBase to solicit a summary. [Date last reviewed: 2016-10-13]	-	CG45080	-	-	-	-
FBgn0053109	723.182	1.4649	0.124279	11.7872	4.54486e-32	2.27455e-28	CG33109	protein_coding			Insufficient genetic data for FlyBase to solicit a summary. [Date last reviewed: 2016-06-30]	-	CG33109	-	-	-	-
FBgn0264991	138.918	2.05939	0.178689	11.525	9.87417e-31	3.70627e-27	CG44142	protein_coding	GO:0003674|GO:0008150|GO:0005575	molecular_function|biological_process|cellular_component	Insufficient genetic data for FlyBase to solicit a summary. [Date last reviewed: 2016-10-13]	-	CG44142	-	-	-	-
FBgn0003900	243.815	-1.7642	0.16037	-11.0008	3.78708e-28	1.13719e-24	twi	protein_coding	GO:0003677|GO:0046982|GO:0005634|GO:0005737|GO:0016202|GO:0007435|GO:0000981|GO:0045944|GO:0007507|GO:0046983|GO:0042803|GO:0007498|GO:0007443|GO:0001710|GO:0007501|GO:0007369|GO:0048747|GO:0010004|GO:0031032|GO:0007370|GO:0007500|GO:0007499|GO:0006357|GO:0000977|GO:0007275|GO:0030154|GO:0032502|GO:0003677|GO:0046982|GO:0005634|GO:0005737|GO:0016202|GO:0007435|GO:0000981|GO:0045944|GO:0007507|GO:…	DNA binding|protein heterodimerization activity|nucleus|cytoplasm|regulation of striated muscle tissue development|salivary gland morphogenesis|DNA-binding transcription factor activity, RNA polymerase II-specific|positive regulation of transcription by RNA polymerase II|heart development|protein dimerization activity|protein homodimerization activity|mesoderm development|Malpighian tubule morpho…	twist (twi) encodes a transcription factor required for mesoderm cell fate. The product of twi is essential for gastrulation, the development of mesodermal derivatives, including somatic and visceral muscle, fat body and maintenance of muscle stem cells. [Date last reviewed: 2019-03-14]	twist	twi	Involved in the establishment and dorsoventral patterning of germ layers in the embryo.	-	Efficient DNA binding requires dimerization with another bHLH protein. Homodimer.	-
FBgn0051087	585.784	-1.31985	0.125809	-10.4909	9.50993e-26	2.3797e-22	CG31087	protein_coding			Insufficient genetic data for FlyBase to solicit a summary. [Date last reviewed: 2016-06-30]	-	CG31087	-	-	-	-
FBgn0032549	56.5928	3.10263	0.331985	9.34571	9.12756e-21	1.95773e-17	CG4650	protein_coding	GO:0006508|GO:0004252|GO:0016787|GO:0006508|GO:0004252|GO:0016787	proteolysis|serine-type endopeptidase activity|hydrolase activity|proteolysis|serine-type endopeptidase activity|hydrolase activity	Insufficient genetic data for FlyBase to solicit a summary. [Date last reviewed: 2016-06-30]	-	CG4650	-	-	-	-
FBgn0039443	57.1004	-3.37999	0.368119	-9.18178	4.24005e-20	7.95752e-17	TwdlS	protein_coding	GO:0031012|GO:0010171|GO:0040003|GO:0005214	extracellular matrix|body morphogenesis|chitin-based cuticle development|structural constituent of chitin-based cuticle	Insufficient genetic data for FlyBase to solicit a summary. [Date last reviewed: 2016-06-30]	TweedleS	TwdlS	-	-	-	-
FBgn0034800	1949.38	-0.767146	0.0836952	-9.16595	4.91145e-20	8.19339e-17	CG3788	protein_coding	GO:0005737|GO:0003824|GO:0009116|GO:0044206|GO:0009166|GO:0004850|GO:0016740|GO:0005634|GO:0016757|GO:0016763|GO:0005737|GO:0003824|GO:0009116|GO:0044206|GO:0009166|GO:0004850|GO:0016740|GO:0005634|GO:0016757|GO:0016763	cytoplasm|catalytic activity|nucleoside metabolic process|UMP salvage|nucleotide catabolic process|uridine phosphorylase activity|transferase activity|nucleus|transferase activity, transferring glycosyl groups|transferase activity, transferring pentosyl groups|cytoplasm|catalytic activity|nucleoside metabolic process|UMP salvage|nucleotide catabolic process|uridine phosphorylase activity|transfer…	-	-	CG3788	-	-	-	-
FBgn0032373	1669.92	-1.15722	0.126597	-9.14101	6.18737e-20	9.28972e-17	Vha100-5	protein_coding	GO:0016021|GO:0005886|GO:0016787|GO:0046961|GO:0015991|GO:0000220|GO:0015078|GO:1902600|GO:0007035|GO:0016471|GO:0051117|GO:0033179|GO:0016020|GO:0006811|GO:0016021|GO:0005886|GO:0016787|GO:0046961|GO:0015991|GO:0000220|GO:0015078|GO:1902600|GO:0007035|GO:0016471|GO:0051117|GO:0033179|GO:0016020|GO:0006811	integral component of membrane|plasma membrane|hydrolase activity|proton-transporting ATPase activity, rotational mechanism|GO_0015991|vacuolar proton-transporting V-type ATPase, V0 domain|proton transmembrane transporter activity|proton transmembrane transport|vacuolar acidification|vacuolar proton-transporting V-type ATPase complex|ATPase binding|proton-transporting V-type ATPase, V0 domain|mem…	-	Vacuolar H[+] ATPase 100kD subunit 5	Vha100-5	-	-	-	-
FBgn0264775	209.021	2.14054	0.235133	9.10349	8.74718e-20	1.19391e-16	CG44013	protein_coding	GO:0003674|GO:0008150|GO:0005575|GO:0003674|GO:0008150|GO:0005575	molecular_function|biological_process|cellular_component|molecular_function|biological_process|cellular_component	Insufficient genetic data for FlyBase to solicit a summary. [Date last reviewed: 2016-06-30]	-	CG44013	-	-	-	-
FBgn0085736	199.623	1.66764	0.189627	8.79429	1.43952e-18	1.80108e-15	CG40472	protein_coding	GO:0005743|GO:0005747|GO:0016020|GO:0003674|GO:0008150|GO:0005739|GO:0055114|GO:0070469	mitochondrial inner membrane|mitochondrial respiratory chain complex I|membrane|molecular_function|biological_process|mitochondrion|oxidation-reduction process|respirasome	-	-	CG40472	-	-	-	-
FBgn0033446	9844.05	-0.882008	0.111521	-7.9089	2.59682e-15	2.99912e-12	CG1648	protein_coding			Insufficient genetic data for FlyBase to solicit a summary. [Date last reviewed: 2016-06-30]	-	CG1648	-	-	-	-
FBgn0038337	1343.42	0.733088	0.0932778	7.85919	3.8661e-15	4.14612e-12	CG6125	protein_coding	GO:0016021|GO:0005887|GO:0055085|GO:0016020|GO:0008272|GO:0015116|GO:0008271|GO:0015301|GO:0098656|GO:1902358|GO:0016021|GO:0005887|GO:0055085|GO:0016020|GO:0008272|GO:0015116|GO:0008271|GO:0015301|GO:0098656|GO:1902358|GO:0016021|GO:0005887|GO:0055085|GO:0016020|GO:0008272|GO:0015116|GO:0008271|GO:0015301|GO:0098656|GO:1902358	integral component of membrane|integral component of plasma membrane|transmembrane transport|membrane|sulfate transport|sulfate transmembrane transporter activity|secondary active sulfate transmembrane transporter activity|anion:anion antiporter activity|anion transmembrane transport|sulfate transmembrane transport|integral component of membrane|integral component of plasma membrane|transmembrane…	Insufficient genetic data for FlyBase to solicit a summary. [Date last reviewed: 2016-06-30]	-	CG6125	-	-	-	-
FBgn0034331	1297.14	1.84519	0.237011	7.78527	6.95619e-15	6.96268e-12	CG15067	protein_coding	GO:0005576|GO:0005576	extracellular region|extracellular region	Insufficient genetic data for FlyBase to solicit a summary. [Date last reviewed: 2016-06-30]	Bomanin Bicipital 2	BomBc2	-	-	-	-
FBgn0030098	913.456	1.44548	0.190164	7.60125	2.93286e-14	2.70922e-11	CG12057	protein_coding			Insufficient genetic data for FlyBase to solicit a summary. [Date last reviewed: 2016-06-30]	-	CG12057	-	-	-	-
FBgn0004414	4471.32	0.859783	0.113197	7.59544	3.06759e-14	2.70922e-11	msopa	protein_coding	GO:0005615|GO:0032504|GO:0006952|GO:0003674|GO:0005615|GO:0032504|GO:0006952|GO:0003674	extracellular space|multicellular organism reproduction|defense response|molecular_function|extracellular space|multicellular organism reproduction|defense response|molecular_function	male-specific opa containing gene (msopa) encodes a peptide produced by male accessory glands and transferred to females during mating. [Date last reviewed: 2019-03-14]	male-specific opa containing gene	msopa	May be a male specific regulatory factor.	-	-	-
hSpCas9	44.3342	8.90166	1.20056	7.41458	1.22014e-13	1.01774e-10
FBgn0000180	189.909	-2.35698	0.319941	-7.3669	1.74636e-13	1.38e-10	bib	protein_coding	GO:0016021|GO:0055085|GO:0016020|GO:0015267|GO:0016021|GO:0005886|GO:0005912|GO:0055085|GO:0044719|GO:0031410|GO:0007498|GO:0016020|GO:0045747|GO:0030707|GO:0005261|GO:0098609|GO:0007398|GO:0046331|GO:0015267|GO:0048665|GO:0006833|GO:0006811|GO:0034220|GO:0007275|GO:0098655|GO:0007399|GO:0030154	integral component of membrane|transmembrane transport|membrane|channel activity|integral component of membrane|plasma membrane|adherens junction|transmembrane transport|regulation of imaginal disc-derived wing size|cytoplasmic vesicle|mesoderm development|membrane|positive regulation of Notch signaling pathway|ovarian follicle cell development|cation channel activity|cell-cell adhesion|ectoderm …	big brain (bib) encodes a non-selective cation channel in the aquaporin family. Its function is required for optimal Notch signaling to restrain neurogenesis. [Date last reviewed: 2018-09-06]	big brain	bib	Essential for proper differentiation of ectoderm. Acts synergistically with neurogenic locus proteins Notch and Delta during the separation of neural and epidermal cell lineages in response to the lateral inhibition signal. Voltage-insensitive monovalent cation channel. Ion transport is blocked by the presence of divalent cations.	Belongs to the MIP/aquaporin (TC 1.A.8) family.	-	-
FBgn0046776	188.581	1.07551	0.148168	7.25873	3.9074e-13	2.93329e-10	CR14033	pseudogene			-	-	CR14033	-	-	-	-
FBgn0263412	30.3199	3.18531	0.439603	7.24589	4.2962e-13	3.07158e-10	lncRNA:CR43458	ncRNA			-	long non-coding RNA:CR43458	lncRNA:CR43458	-	-	-	-
FBgn0032553	746.297	-0.84047	0.11628	-7.22796	4.90306e-13	3.34612e-10	CG4480	protein_coding	GO:0016021|GO:0016020|GO:0016021|GO:0016020	integral component of membrane|membrane|integral component of membrane|membrane	Insufficient genetic data for FlyBase to solicit a summary. [Date last reviewed: 2016-06-30]	-	CG4480	-	-	-	-
FBgn0266247	36.9936	8.6376	1.21124	7.1312	9.9501e-13	6.49525e-10	lncRNA:CR44942	ncRNA			-	long non-coding RNA:CR44942	lncRNA:CR44942	-	-	-	-
FBgn0263322	34.3564	4.64068	0.653049	7.10617	1.1931e-12	7.46384e-10	CG43403	protein_coding	GO:0003674|GO:0008150|GO:0005575	molecular_function|biological_process|cellular_component	Insufficient genetic data for FlyBase to solicit a summary. [Date last reviewed: 2016-10-13]	-	CG43403	-	-	-	-
FBgn0043535	139.787	-1.40215	0.199533	-7.02718	2.10748e-12	1.26567e-09	Obp57a	protein_coding	GO:0005576|GO:0007606|GO:0007608|GO:0005549|GO:1990834|GO:0050896|GO:0005575	extracellular region|sensory perception of chemical stimulus|sensory perception of smell|odorant binding|response to odorant|response to stimulus|cellular_component	Insufficient genetic data for FlyBase to solicit a summary. [Date last reviewed: 2016-06-30]	Odorant-binding protein 57a	Obp57a	Present in the aqueous fluid surrounding olfactory sensory dendrites and are thought to aid in the capture and transport of hydrophobic odorants into and through this fluid.	Belongs to the PBP/GOBP family.	-	-
FBgn0259237	104.347	-1.35182	0.198175	-6.82135	9.01904e-12	5.20815e-09	CG42335	protein_coding	GO:0005737|GO:0006508|GO:0008270|GO:0070006|GO:0043171|GO:0042277|GO:0008237|GO:0016787|GO:0046872|GO:0004177|GO:0008233	cytoplasm|proteolysis|zinc ion binding|metalloaminopeptidase activity|peptide catabolic process|peptide binding|metallopeptidase activity|hydrolase activity|metal ion binding|aminopeptidase activity|peptidase activity	-	-	CG42335	-	-	-	-
FBgn0000042	16640.7	-0.456449	0.0677865	-6.73363	1.65479e-11	9.20189e-09	Act5C	protein_coding	GO:0005737|GO:0005524|GO:0005856|GO:0000281|GO:0015629|GO:0005200|GO:0007291|GO:0006338|GO:0032507|GO:0035060|GO:0005884|GO:0007010|GO:0031011|GO:0035148|GO:0000166|GO:0005515|GO:0005737|GO:0005524|GO:0005856|GO:0000281|GO:0015629|GO:0005200|GO:0007291|GO:0006338|GO:0032507|GO:0035060|GO:0005884|GO:0007010|GO:0031011|GO:0035148|GO:0000166|GO:0005515|GO:0005737|GO:0005524|GO:0005856|GO:0000281|GO:…	cytoplasm|ATP binding|cytoskeleton|mitotic cytokinesis|actin cytoskeleton|structural constituent of cytoskeleton|sperm individualization|chromatin remodeling|maintenance of protein location in cell|brahma complex|actin filament|cytoskeleton organization|Ino80 complex|tube formation|nucleotide binding|protein binding|cytoplasm|ATP binding|cytoskeleton|mitotic cytokinesis|actin cytoskeleton|structu…	-	Actin 5C	Act5C	Actins are highly conserved proteins that are involved in various types of cell motility and are ubiquitously expressed in all eukaryotic cells. Multiple isoforms are involved in various cellular functions such as cytoskeleton structure, cell mobility, chromosome movement and muscle contraction.	Belongs to the actin family.	Interacts with Rab6.	-
FBgn0263080	70.9343	-1.688	0.25148	-6.71225	1.91642e-11	1.02761e-08	CG43348	protein_coding	GO:0003674|GO:0008150|GO:0005575|GO:0003674|GO:0008150|GO:0005575	molecular_function|biological_process|cellular_component|molecular_function|biological_process|cellular_component	Insufficient genetic data for FlyBase to solicit a summary. [Date last reviewed: 2016-10-13]	-	CG43348	-	-	-	-
FBgn0040503	37.0461	2.31282	0.34573	6.68968	2.23658e-11	1.15793e-08	CG7763	protein_coding	GO:0030246	carbohydrate binding	Insufficient genetic data for FlyBase to solicit a summary. [Date last reviewed: 2016-06-30]	-	CG7763	-	-	-	-
FBgn0031033	101.06	-1.29204	0.193517	-6.67664	2.44477e-11	1.22353e-08	CG14219	protein_coding	GO:0016021|GO:0016747|GO:0016020|GO:0016740|GO:0016746	integral component of membrane|transferase activity, transferring acyl groups other than amino-acyl groups|membrane|transferase activity|transferase activity, transferring acyl groups	Insufficient genetic data for FlyBase to solicit a summary. [Date last reviewed: 2016-06-30]	-	CG14219	-	-	-	-
FBgn0032364	303.86	1.10518	0.167084	6.61453	3.7273e-11	1.80521e-08	CG4970	protein_coding	GO:0003674|GO:0008150|GO:0005575|GO:0005737|GO:0005856	molecular_function|biological_process|cellular_component|cytoplasm|cytoskeleton	Insufficient genetic data for FlyBase to solicit a summary. [Date last reviewed: 2016-06-30]	-	CG4970	-	-	-	-
FBgn0020270	173.911	1.16382	0.176317	6.60073	4.09126e-11	1.91957e-08	mre11	protein_coding	GO:0005634|GO:0006303|GO:0016787|GO:0000724|GO:0031573|GO:0000723|GO:0008408|GO:0051276|GO:0030145|GO:0004519|GO:0008296|GO:0007095|GO:0030870|GO:0016233|GO:0006302|GO:0097552|GO:0042138|GO:0006281|GO:0006974|GO:0090305|GO:0004518|GO:0004527|GO:0000784|GO:0035861|GO:0051321|GO:0000014	nucleus|double-strand break repair via nonhomologous end joining|hydrolase activity|double-strand break repair via homologous recombination|intra-S DNA damage checkpoint|telomere maintenance|3'-5' exonuclease activity|chromosome organization|manganese ion binding|endonuclease activity|3'-5'-exodeoxyribonuclease activity|mitotic G2 DNA damage checkpoint|Mre11 complex|telomere capping|double-strand…	meiotic recombination 11 (mre11) encodes a protein involved in the mitotic G2 DNA damage checkpoint and telomere capping. [Date last reviewed: 2019-09-26]	meiotic recombination 11	mre11	-	-	-	-
FBgn0037204	74.5935	1.71441	0.263955	6.49508	8.2989e-11	3.77575e-08	CG11131	protein_coding	GO:0005615|GO:0032504|GO:0003674|GO:0005615|GO:0032504|GO:0003674	extracellular space|multicellular organism reproduction|molecular_function|extracellular space|multicellular organism reproduction|molecular_function	Insufficient genetic data for FlyBase to solicit a summary. [Date last reviewed: 2016-06-30]	-	CG11131	-	-	-	-
FBgn0005664	241.418	-0.985276	0.152375	-6.46614	1.0054e-10	4.43975e-08	Crys	protein_coding	GO:0005576|GO:0005509|GO:0007601|GO:0031012|GO:0042302|GO:0048058|GO:0005212|GO:0005576|GO:0005509|GO:0007601|GO:0031012|GO:0042302|GO:0048058|GO:0005212	extracellular region|calcium ion binding|visual perception|extracellular matrix|structural constituent of cuticle|compound eye corneal lens development|structural constituent of eye lens|extracellular region|calcium ion binding|visual perception|extracellular matrix|structural constituent of cuticle|compound eye corneal lens development|structural constituent of eye lens	Crystallin (Crys) encodes a chitin binding protein involved in the formation of the peritrophic matrix, a chitinous layer lining the midgut. [Date last reviewed: 2019-03-07]	Crystallin	Crys	-	-	-	-
FBgn0262944	107.786	2.01783	0.313015	6.44642	1.14525e-10	4.9128e-08	lncRNA:CR43263	ncRNA			-	long non-coding RNA:CR43263	lncRNA:CR43263	-	-	-	-
FBgn0036022	341.763	-0.817932	0.127058	-6.43746	1.21493e-10	5.06692e-08	CG8329	protein_coding	GO:0006508|GO:0004252|GO:0016787|GO:0008233|GO:0008236	proteolysis|serine-type endopeptidase activity|hydrolase activity|peptidase activity|serine-type peptidase activity	Insufficient genetic data for FlyBase to solicit a summary. [Date last reviewed: 2016-06-30]	-	CG8329	-	-	-	-
FBgn0262097	1520.62	-0.608088	0.0952184	-6.38625	1.70007e-10	6.89861e-08	lncRNA:CR42850	ncRNA			-	long non-coding RNA:CR42850	lncRNA:CR42850	-	-	-	-
FBgn0035429	38.1255	-2.29666	0.360273	-6.37478	1.83229e-10	7.23946e-08	CG12017	protein_coding	GO:0016021|GO:0016020|GO:0016021|GO:0016020|GO:0016021|GO:0016020|GO:0016021|GO:0016020	integral component of membrane|membrane|integral component of membrane|membrane|integral component of membrane|membrane|integral component of membrane|membrane	Insufficient genetic data for FlyBase to solicit a summary. [Date last reviewed: 2016-06-30]	-	CG12017	-	-	-	-
FBgn0035315	18.1027	-7.64376	1.22539	-6.23782	4.4371e-10	1.70817e-07	CG8960	protein_coding			Insufficient genetic data for FlyBase to solicit a summary. [Date last reviewed: 2016-06-30]	-	CG8960	-	-	-	-
FBgn0028892	1276.97	-0.545819	0.0875749	-6.2326	4.58748e-10	1.72191e-07	CG4161	protein_coding	GO:0051998|GO:0008757|GO:0006479|GO:0005575|GO:0016787|GO:0046872|GO:0016311|GO:0008168|GO:0032259|GO:0016791|GO:2001020|GO:0051998|GO:0008757|GO:0006479|GO:0005575|GO:0016787|GO:0046872|GO:0016311|GO:0008168|GO:0032259|GO:0016791|GO:2001020	protein carboxyl O-methyltransferase activity|S-adenosylmethionine-dependent methyltransferase activity|protein methylation|cellular_component|hydrolase activity|metal ion binding|dephosphorylation|methyltransferase activity|methylation|phosphatase activity|regulation of response to DNA damage stimulus|protein carboxyl O-methyltransferase activity|S-adenosylmethionine-dependent methyltransferase …	Insufficient genetic data for FlyBase to solicit a summary. [Date last reviewed: 2016-06-30]	-	CG4161	-	-	-	-
FBgn0033769	302.699	-1.43967	0.234661	-6.13509	8.51093e-10	3.11666e-07	CG8768	protein_coding	GO:0003824|GO:0050662	catalytic activity|coenzyme binding	Insufficient genetic data for FlyBase to solicit a summary. [Date last reviewed: 2016-06-30]	-	CG8768	-	-	-	-
FBgn0015586	3710	0.531341	0.0868338	6.11905	9.41332e-10	3.36504e-07	Acp76A	protein_coding	GO:0005615|GO:0010951|GO:0005576|GO:0004867|GO:0030414|GO:0010466|GO:0005615|GO:0032504|GO:0010951|GO:0005576|GO:0004867|GO:0007610|GO:0030414|GO:0010466	extracellular space|negative regulation of endopeptidase activity|extracellular region|serine-type endopeptidase inhibitor activity|peptidase inhibitor activity|negative regulation of peptidase activity|extracellular space|multicellular organism reproduction|negative regulation of endopeptidase activity|extracellular region|serine-type endopeptidase inhibitor activity|behavior|peptidase inhibitor…	Accessory gland protein 76A (Acp76A) encodes a protein that shows homology to the serpin serine endopeptidase inhibitor family but is predicted to be non-inhibitory. It is produced in the male accessory glands and transferred to females during mating. [Date last reviewed: 2019-03-07]	Accessory gland protein 76A	Acp76A	Responsible for physiological and behavioral changes in mated female flies. May play a role in accessory protein regulation and/or in the coagulation of seminal fluid to form a mating plug.	Belongs to the serpin family.	-	-
FBgn0037724	570.809	-1.09025	0.179363	-6.07847	1.21335e-09	4.23656e-07	Fst	protein_coding	GO:0005615|GO:0009631|GO:0009409|GO:0003674	extracellular space|cold acclimation|response to cold|molecular_function	Frost (Fst) encodes a potentially secreted protein that protects female reproduction after cold treatment. [Date last reviewed: 2018-11-15]	Frost	Fst	-	-	-	-
FBgn0034318	596.112	1.08981	0.17996	6.05584	1.39687e-09	4.7665e-07	CG14500	protein_coding	GO:0030246	carbohydrate binding	Insufficient genetic data for FlyBase to solicit a summary. [Date last reviewed: 2016-06-30]	-	CG14500	-	-	-	-
FBgn0034470	3316.76	-0.753432	0.124621	-6.04576	1.48704e-09	4.96143e-07	Obp56d	protein_coding	GO:0005576|GO:0007606|GO:0042048|GO:0007608|GO:0005549|GO:0019236|GO:0050896|GO:0005576|GO:0007606|GO:0042048|GO:0007608|GO:0005549|GO:0019236|GO:0050896	extracellular region|sensory perception of chemical stimulus|olfactory behavior|sensory perception of smell|odorant binding|response to pheromone|response to stimulus|extracellular region|sensory perception of chemical stimulus|olfactory behavior|sensory perception of smell|odorant binding|response to pheromone|response to stimulus	Insufficient genetic data for FlyBase to solicit a summary. [Date last reviewed: 2016-06-30]	Odorant-binding protein 56d	Obp56d	Present in the aqueous fluid surrounding olfactory sensory dendrites and are thought to aid in the capture and transport of hydrophobic odorants into and through this fluid.	Belongs to the PBP/GOBP family.	-	-
FBgn0267725	300.036	0.750274	0.124712	6.01607	1.78707e-09	5.83285e-07	asRNA:CR46058	ncRNA			-	antisense RNA:CR46058	asRNA:CR46058	-	-	-	-
FBgn0259229	153.784	1.2994	0.21677	5.9944	2.04243e-09	6.52449e-07	CG42329	protein_coding	GO:0016021|GO:0016747|GO:0016020|GO:0016740|GO:0016746	integral component of membrane|transferase activity, transferring acyl groups other than amino-acyl groups|membrane|transferase activity|transferase activity, transferring acyl groups	-	-	CG42329	-	-	-	-
FBgn0002569	1141.29	-1.04062	0.174191	-5.97402	2.3148e-09	7.24051e-07	Mal-A2	protein_coding	GO:0003824|GO:0005975|GO:0032450|GO:0004558|GO:0016787|GO:0008152|GO:0016798|GO:0090599|GO:0000023	catalytic activity|carbohydrate metabolic process|maltose alpha-glucosidase activity|alpha-1,4-glucosidase activity|hydrolase activity|metabolic process|hydrolase activity, acting on glycosyl bonds|alpha-glucosidase activity|maltose metabolic process	Insufficient genetic data for FlyBase to solicit a summary. [Date last reviewed: 2016-06-30]	Maltase A2	Mal-A2	-	Belongs to the glycosyl hydrolase 13 family.	-	-
FBgn0031645	1651.2	0.471744	0.0804001	5.86745	4.42536e-09	1.35597e-06	CG3036	protein_coding	GO:0016021|GO:0005886|GO:0055085|GO:0022857|GO:0016020|GO:0006820|GO:0016021|GO:0005886|GO:0055085|GO:0022857|GO:0016020|GO:0006820	integral component of membrane|plasma membrane|transmembrane transport|transmembrane transporter activity|membrane|anion transport|integral component of membrane|plasma membrane|transmembrane transport|transmembrane transporter activity|membrane|anion transport	-	-	CG3036	-	-	-	-
FBgn0030592	208.147	1.04268	0.178089	5.85478	4.77633e-09	1.43424e-06	CG9514	protein_coding	GO:0016021|GO:0055114|GO:0016491|GO:0050660|GO:0045455|GO:0016614|GO:0016020	integral component of membrane|oxidation-reduction process|oxidoreductase activity|flavin adenine dinucleotide binding|ecdysteroid metabolic process|oxidoreductase activity, acting on CH-OH group of donors|membrane	Insufficient genetic data for FlyBase to solicit a summary. [Date last reviewed: 2016-06-30]	-	CG9514	-	-	-	-
FBgn0039629	165.104	1.07759	0.185361	5.81347	6.119e-09	1.80139e-06	CG11842	protein_coding	GO:0034976|GO:0006508|GO:0004252|GO:0005575|GO:0016787|GO:0008233|GO:0008236	response to endoplasmic reticulum stress|proteolysis|serine-type endopeptidase activity|cellular_component|hydrolase activity|peptidase activity|serine-type peptidase activity	-	-	CG11842	-	-	-	-
FBgn0034664	1881.73	-1.21776	0.210234	-5.7924	6.93893e-09	2.00348e-06	CG4377	protein_coding			Insufficient genetic data for FlyBase to solicit a summary. [Date last reviewed: 2016-06-30]	-	CG4377	-	-	-	-
FBgn0034317	239.867	-3.29086	0.573744	-5.73576	9.7075e-09	2.74997e-06	CG14499	protein_coding	GO:0030246|GO:0008150|GO:0005575	carbohydrate binding|biological_process|cellular_component	Insufficient genetic data for FlyBase to solicit a summary. [Date last reviewed: 2016-06-30]	-	CG14499	-	-	-	-
FBgn0031426	237.183	-0.845915	0.147705	-5.72705	1.0219e-08	2.84126e-06	CG18641	protein_coding	GO:0005615|GO:0016042|GO:0016298|GO:0052689|GO:0006629|GO:0016787|GO:0005576|GO:0004806	extracellular space|lipid catabolic process|lipase activity|carboxylic ester hydrolase activity|lipid metabolic process|hydrolase activity|extracellular region|triglyceride lipase activity	Insufficient genetic data for FlyBase to solicit a summary. [Date last reviewed: 2016-06-30]	-	CG18641	-	-	-	-
FBgn0265730	17.9568	5.11008	0.897125	5.69606	1.22608e-08	3.3205e-06	lncRNA:CR44537	ncRNA			-	long non-coding RNA:CR44537	lncRNA:CR44537	-	-	-	-
FBgn0025692	207.722	-0.827293	0.145283	-5.69434	1.2385e-08	3.3205e-06	Lfg	protein_coding	GO:0016021|GO:0016020|GO:0016021|GO:0016020|GO:0016021|GO:0016020|GO:0016021|GO:0016020	integral component of membrane|membrane|integral component of membrane|membrane|integral component of membrane|membrane|integral component of membrane|membrane	Insufficient genetic data for FlyBase to solicit a summary. [Date last reviewed: 2016-06-30]	Lifeguard	Lfg	-	-	-	-
FBgn0267710	40.571	2.38164	0.423218	5.62745	1.82897e-08	4.81757e-06	lncRNA:CR46043	ncRNA			-	long non-coding RNA:CR46043	lncRNA:CR46043	-	-	-	-
FBgn0264352	22.7421	4.69045	0.835581	5.6134	1.98388e-08	5.13553e-06	lncRNA:CR43808	ncRNA			-	long non-coding RNA:CR43808	lncRNA:CR43808	-	-	-	-
FBgn0039109	2880.14	-0.425469	0.0762875	-5.57718	2.44447e-08	6.14216e-06	CG10365	protein_coding	GO:0005737|GO:0005802|GO:0005112|GO:0022008|GO:0006751|GO:0003839|GO:0061928|GO:0016829|GO:0005737|GO:0005802|GO:0005112|GO:0022008|GO:0006751|GO:0003839|GO:0061928|GO:0016829|GO:0005737|GO:0005802|GO:0005112|GO:0022008|GO:0006751|GO:0003839|GO:0061928|GO:0016829|GO:0005737|GO:0005802|GO:0005112|GO:0022008|GO:0006751|GO:0003839|GO:0061928|GO:0016829	cytoplasm|trans-Golgi network|Notch binding|neurogenesis|glutathione catabolic process|gamma-glutamylcyclotransferase activity|glutathione specific gamma-glutamylcyclotransferase activity|lyase activity|cytoplasm|trans-Golgi network|Notch binding|neurogenesis|glutathione catabolic process|gamma-glutamylcyclotransferase activity|glutathione specific gamma-glutamylcyclotransferase activity|lyase ac…	Insufficient genetic data for FlyBase to solicit a summary. [Date last reviewed: 2016-06-30]	-	CG10365	-	-	-	-
FBgn0034290	470.854	0.656744	0.117771	5.57646	2.45457e-08	6.14216e-06	CG5773	protein_coding			Insufficient genetic data for FlyBase to solicit a summary. [Date last reviewed: 2016-06-30]	-	CG5773	-	-	-	-
FBgn0031692	1164.41	0.533716	0.096549	5.52793	3.24029e-08	7.84815e-06	TpnC25D	protein_coding	GO:0005509|GO:0019722|GO:0000226|GO:0050790|GO:0030234|GO:0005509|GO:0019722|GO:0005865|GO:0000226|GO:0050790|GO:0030234|GO:0005509|GO:0019722|GO:0005865|GO:0000226|GO:0050790|GO:0030234	calcium ion binding|calcium-mediated signaling|microtubule cytoskeleton organization|regulation of catalytic activity|enzyme regulator activity|calcium ion binding|calcium-mediated signaling|striated muscle thin filament|microtubule cytoskeleton organization|regulation of catalytic activity|enzyme regulator activity|calcium ion binding|calcium-mediated signaling|striated muscle thin filament|micr…	Insufficient genetic data for FlyBase to solicit a summary. [Date last reviewed: 2016-06-30]	Troponin C at 25D	TpnC25D	-	-	-	-
FBgn0038918	992.484	0.547396	0.0990241	5.5279	3.24088e-08	7.84815e-06	Qsox3	protein_coding	GO:0055114|GO:0005576|GO:0005615|GO:0032504|GO:0045454|GO:0030173|GO:0003756|GO:0016971|GO:0016972|GO:0016491|GO:0016853|GO:0006457	oxidation-reduction process|extracellular region|extracellular space|multicellular organism reproduction|cell redox homeostasis|integral component of Golgi membrane|protein disulfide isomerase activity|flavin-linked sulfhydryl oxidase activity|thiol oxidase activity|oxidoreductase activity|isomerase activity|protein folding	Insufficient genetic data for FlyBase to solicit a summary. [Date last reviewed: 2016-06-30]	Quiescin sulfhydryl oxidase 3	Qsox3	-	-	-	-
FBgn0038938	2231.65	0.458853	0.0830649	5.52402	3.31322e-08	7.89599e-06	CG7084	protein_coding	GO:0016021|GO:0055085|GO:0022857|GO:0016020|GO:0016021|GO:0055085|GO:0022857|GO:0016020|GO:0016021|GO:0055085|GO:0022857|GO:0016020|GO:0016021|GO:0055085|GO:0022857|GO:0016020	integral component of membrane|transmembrane transport|transmembrane transporter activity|membrane|integral component of membrane|transmembrane transport|transmembrane transporter activity|membrane|integral component of membrane|transmembrane transport|transmembrane transporter activity|membrane|integral component of membrane|transmembrane transport|transmembrane transporter activity|membrane	Insufficient genetic data for FlyBase to solicit a summary. [Date last reviewed: 2016-06-30]	-	CG7084	-	-	-	-
FBgn0052982	736.84	-0.563649	0.102351	-5.50699	3.65014e-08	8.563e-06	CG32982	protein_coding	GO:0005886|GO:0031532|GO:0005886|GO:0031532|GO:0005886|GO:0031532|GO:0005886|GO:0031532|GO:0005886|GO:0031532|GO:0005886|GO:0031532|GO:0005886|GO:0031532	plasma membrane|actin cytoskeleton reorganization|plasma membrane|actin cytoskeleton reorganization|plasma membrane|actin cytoskeleton reorganization|plasma membrane|actin cytoskeleton reorganization|plasma membrane|actin cytoskeleton reorganization|plasma membrane|actin cytoskeleton reorganization|plasma membrane|actin cytoskeleton reorganization	Insufficient genetic data for FlyBase to solicit a summary. [Date last reviewed: 2016-10-13]	-	CG32982	-	-	-	-
FBgn0029827	174.192	-0.910402	0.16562	-5.49693	3.86456e-08	8.92653e-06	CG6048	protein_coding	GO:0006508|GO:0004252|GO:2000331|GO:0016787|GO:0008233|GO:0008236	proteolysis|serine-type endopeptidase activity|regulation of terminal button organization|hydrolase activity|peptidase activity|serine-type peptidase activity	Insufficient genetic data for FlyBase to solicit a summary. [Date last reviewed: 2016-06-30]	-	CG6048	-	-	-	-
FBgn0266564	82.917	1.27447	0.23571	5.40695	6.4107e-08	1.45834e-05	lncRNA:CR45103	ncRNA			-	long non-coding RNA:CR45103	lncRNA:CR45103	-	-	-	-
FBgn0265270	2455.29	0.474305	0.0881011	5.38364	7.29945e-08	1.63275e-05	lncRNA:CR43239	ncRNA			-	long non-coding RNA:CR43239	lncRNA:CR43239	-	-	-	-
FBgn0040074	764.145	0.955034	0.177473	5.3813	7.39491e-08	1.63275e-05	retinin	protein_coding	GO:0005615|GO:0008150|GO:0005576|GO:0005212	extracellular space|biological_process|extracellular region|structural constituent of eye lens	Insufficient genetic data for FlyBase to solicit a summary. [Date last reviewed: 2016-06-30]	retinin	retinin	-	-	-	-
FBgn0051081	16.0313	-6.49389	1.23068	-5.27668	1.31542e-07	2.86228e-05	TwdlR	protein_coding	GO:0031012|GO:0010171|GO:0040003|GO:0005214	extracellular matrix|body morphogenesis|chitin-based cuticle development|structural constituent of chitin-based cuticle	-	TweedleR	TwdlR	-	-	-	-
FBgn0261292	30.3225	-1.94616	0.369211	-5.27113	1.35589e-07	2.90818e-05	CheB53a	protein_coding	GO:0005576|GO:0005615|GO:0007606|GO:0008289|GO:0043695	extracellular region|extracellular space|sensory perception of chemical stimulus|lipid binding|detection of pheromone	Insufficient genetic data for FlyBase to solicit a summary. [Date last reviewed: 2016-06-30]	Chemosensory protein B 53a	CheB53a	-	-	-	-
FBgn0261675	220.726	-1.47633	0.280846	-5.25673	1.46643e-07	3.10098e-05	Npc1b	protein_coding	GO:0016021|GO:0005886|GO:0007417|GO:0007391|GO:0007422|GO:0030299|GO:0008203|GO:0016020|GO:0006869|GO:0006629|GO:0008202	integral component of membrane|plasma membrane|central nervous system development|dorsal closure|peripheral nervous system development|intestinal cholesterol absorption|cholesterol metabolic process|membrane|lipid transport|lipid metabolic process|steroid metabolic process	-	Niemann-Pick type C-1b	Npc1b	Important for cholesterol absorption at the midgut epithelium. Acts only in the early steps of sterol absorption, prior to Npc1a-dependent intracellular sterol trafficking.	Belongs to the patched family.	-	-
FBgn0036738	3823.66	-0.745032	0.142354	-5.23365	1.66192e-07	3.46556e-05	CG7542	protein_coding	GO:0006508|GO:0004252|GO:0016787|GO:0008233|GO:0008236|GO:0006508|GO:0004252|GO:0016787|GO:0008233|GO:0008236	proteolysis|serine-type endopeptidase activity|hydrolase activity|peptidase activity|serine-type peptidase activity|proteolysis|serine-type endopeptidase activity|hydrolase activity|peptidase activity|serine-type peptidase activity	Insufficient genetic data for FlyBase to solicit a summary. [Date last reviewed: 2016-06-30]	-	CG7542	-	-	-	-
FBgn0030200	36.0795	-2.19521	0.422935	-5.19042	2.09822e-07	4.31543e-05	RabX2	protein_coding	GO:0000139|GO:0016192|GO:0006886|GO:0005525|GO:0003924|GO:0031982|GO:0032482|GO:0005886|GO:0032869|GO:0005794|GO:0072659|GO:0005768|GO:0017157|GO:0055037|GO:0006904|GO:0009306|GO:0008021|GO:0032593	Golgi membrane|vesicle-mediated transport|intracellular protein transport|GTP binding|GTPase activity|vesicle|Rab protein signal transduction|plasma membrane|cellular response to insulin stimulus|Golgi apparatus|protein localization to plasma membrane|endosome|regulation of exocytosis|recycling endosome|vesicle docking involved in exocytosis|protein secretion|synaptic vesicle|insulin-responsive c…	Insufficient genetic data for FlyBase to solicit a summary. [Date last reviewed: 2016-06-30]	RabX2	RabX2	-	-	-	-
FBgn0264776	626.359	-0.621861	0.119888	-5.18701	2.13701e-07	4.33581e-05	CG44014	protein_coding	GO:0003674|GO:0008150|GO:0005575	molecular_function|biological_process|cellular_component	Insufficient genetic data for FlyBase to solicit a summary. [Date last reviewed: 2016-10-13]	-	CG44014	-	-	-	-
FBgn0035886	35.2862	2.17693	0.421741	5.16178	2.44609e-07	4.89675e-05	Jon66Ci	protein_coding	GO:0004175|GO:0006508|GO:0004252|GO:0016787	endopeptidase activity|proteolysis|serine-type endopeptidase activity|hydrolase activity	Insufficient genetic data for FlyBase to solicit a summary. [Date last reviewed: 2016-06-30]	Jonah 66Ci	Jon66Ci	-	-	-	-
FBgn0035146	399.76	0.678633	0.132577	5.1188	3.07484e-07	6.07444e-05	CG13893	protein_coding			-	-	CG13893	-	-	-	-
FBgn0051148	279.248	-1.21305	0.237146	-5.1152	3.13411e-07	6.11111e-05	Gba1a	protein_coding	GO:0005623|GO:0008340|GO:0016787|GO:0008344|GO:0007613|GO:0006665|GO:0070050|GO:0046527|GO:0006680|GO:0004348|GO:0034620|GO:0016740|GO:0016757|GO:0006629|GO:0008152|GO:0016798	cell|determination of adult lifespan|hydrolase activity|adult locomotory behavior|memory|sphingolipid metabolic process|neuron cellular homeostasis|glucosyltransferase activity|glucosylceramide catabolic process|glucosylceramidase activity|cellular response to unfolded protein|transferase activity|transferase activity, transferring glycosyl groups|lipid metabolic process|metabolic process|hydrola…	Insufficient genetic data for FlyBase to solicit a summary. [Date last reviewed: 2016-06-30]	Glucocerebrosidase 1a	Gba1a	-	-	-	-
FBgn0265367	35.7115	1.84743	0.361489	5.11062	3.21099e-07	6.18074e-05	lncRNA:CR44308	ncRNA			-	long non-coding RNA:CR44308	lncRNA:CR44308	-	-	-	-
FBgn0034480	341.584	-0.7624	0.149494	-5.09987	3.39879e-07	6.40687e-05	CG16898	protein_coding			Insufficient genetic data for FlyBase to solicit a summary. [Date last reviewed: 2016-06-30]	-	CG16898	-	-	-	-
FBgn0037936	347.857	0.861801	0.169012	5.09904	3.41381e-07	6.40687e-05	CG6908	protein_coding	GO:0055070|GO:0055070	copper ion homeostasis|copper ion homeostasis	Insufficient genetic data for FlyBase to solicit a summary. [Date last reviewed: 2016-06-30]	-	CG6908	-	-	-	-
FBgn0264943	79.5519	1.10254	0.21646	5.0935	3.51505e-07	6.51542e-05	lncRNA:CR44112	ncRNA			-	long non-coding RNA:CR44112	lncRNA:CR44112	-	-	-	-
FBgn0083936	3903.98	-0.910949	0.179494	-5.07509	3.8731e-07	7.09154e-05	Acp54A1	protein_coding	GO:0032504|GO:0003674|GO:0005575	multicellular organism reproduction|molecular_function|cellular_component	Insufficient genetic data for FlyBase to solicit a summary. [Date last reviewed: 2016-06-30]	Accessory gland protein 54A1	Acp54A1	-	-	-	-
FBgn0264993	185.617	-0.775481	0.153775	-5.04296	4.58389e-07	8.29186e-05	asRNA:CR44144	ncRNA			-	antisense RNA:CR44144	asRNA:CR44144	-	-	-	-
FBgn0032087	870.81	-0.524804	0.104174	-5.03779	4.70943e-07	8.41755e-05	CG9568	protein_coding			Insufficient genetic data for FlyBase to solicit a summary. [Date last reviewed: 2016-06-30]	-	CG9568	-	-	-	-
FBgn0000299	2389.08	0.649942	0.129958	5.00118	5.69812e-07	0.000100649	Col4a1	protein_coding	GO:0071711|GO:0005604|GO:0005615|GO:0007391|GO:0031012|GO:0060729|GO:0048621|GO:0055013|GO:0005201|GO:0035848|GO:0030198|GO:0005587|GO:0005581|GO:0005576|GO:0005515|GO:0038063|GO:0071711|GO:0005604|GO:0005615|GO:0007391|GO:0031012|GO:0060729|GO:0048621|GO:0055013|GO:0005201|GO:0035848|GO:0030198|GO:0005587|GO:0005581|GO:0016020|GO:0005576|GO:0005515|GO:0038063|GO:0071711|GO:0005604|GO:0005615|GO:…	basement membrane organization|basement membrane|extracellular space|dorsal closure|extracellular matrix|intestinal epithelial structure maintenance|post-embryonic digestive tract morphogenesis|cardiac muscle cell development|extracellular matrix structural constituent|oviduct morphogenesis|extracellular matrix organization|collagen type IV trimer|collagen trimer|extracellular region|protein bind…	Collagen type IV alpha 1 (Col4a1) encodes a subunit of Collagen IV and a major component of basement membranes. It is required for muscle and epithelium integrity. [Date last reviewed: 2019-03-07]	Collagen type IV alpha 1	Col4a1	Collagen type IV is specific for basement membranes.	Belongs to the type IV collagen family.	Trimers of two alpha 1(IV) and one alpha 2(IV) chain. Type IV collagen forms a mesh-like network linked through intermolecular interactions between 7S domains and between NC1 domains.	-
FBgn0051525	452.031	-0.544904	0.109589	-4.97224	6.61832e-07	0.000114958	CG31525	protein_coding	GO:0003674|GO:0008150|GO:0005575	molecular_function|biological_process|cellular_component	Insufficient genetic data for FlyBase to solicit a summary. [Date last reviewed: 2016-10-13]	-	CG31525	-	-	-	-
FBgn0003082	109.976	1.10775	0.222843	4.97099	6.66132e-07	0.000114958	phr	protein_coding	GO:0006281|GO:0003904|GO:0000719|GO:0003677|GO:0006974|GO:0016829|GO:0006281|GO:0003904|GO:0000719|GO:0003677|GO:0006974|GO:0016829	DNA repair|deoxyribodipyrimidine photo-lyase activity|photoreactive repair|DNA binding|cellular response to DNA damage stimulus|lyase activity|DNA repair|deoxyribodipyrimidine photo-lyase activity|photoreactive repair|DNA binding|cellular response to DNA damage stimulus|lyase activity	photorepair (phr) encodes a DNA photolyase apoenzyme that repairs UV-induced DNA damage using FAD as a cofactor and blue light as a co-substrate. [Date last reviewed: 2019-03-21]	photorepair	phr	-	-	-	-
FBgn0034289	846.54	-0.94926	0.191654	-4.953	7.30772e-07	0.00012468	CG10910	protein_coding			Insufficient genetic data for FlyBase to solicit a summary. [Date last reviewed: 2016-06-30]	-	CG10910	-	-	-	-
FBgn0265694	56.5625	1.25234	0.253275	4.9446	7.63008e-07	0.000128717	lncRNA:CR44501	ncRNA			-	long non-coding RNA:CR44501	lncRNA:CR44501	-	-	-	-
FBgn0029821	598.579	0.594015	0.121205	4.90091	9.53949e-07	0.000158569	CG4020	protein_coding	GO:0005777|GO:0006629|GO:0080019|GO:0010025|GO:0035336|GO:0102965|GO:0016491|GO:0055114|GO:0043231|GO:0005777|GO:0006629|GO:0080019|GO:0010025|GO:0035336|GO:0102965|GO:0016491|GO:0055114|GO:0043231	peroxisome|lipid metabolic process|fatty-acyl-CoA reductase (alcohol-forming) activity|wax biosynthetic process|long-chain fatty-acyl-CoA metabolic process|alcohol-forming fatty acyl-CoA reductase activity|oxidoreductase activity|oxidation-reduction process|intracellular membrane-bounded organelle|peroxisome|lipid metabolic process|fatty-acyl-CoA reductase (alcohol-forming) activity|wax biosynthe…	Insufficient genetic data for FlyBase to solicit a summary. [Date last reviewed: 2016-06-30]	-	CG4020	-	-	-	-
FBgn0263445	258.791	-0.71112	0.145143	-4.89944	9.61085e-07	0.000158569	asRNA:CR43468	ncRNA			-	antisense RNA:CR43468	asRNA:CR43468	-	-	-	-
FBgn0032131	440.929	-0.573956	0.117223	-4.89629	9.76619e-07	0.000159136	CG3841	protein_coding	GO:0016787|GO:0008150|GO:0005575|GO:0052689|GO:0016787|GO:0008150|GO:0005575|GO:0052689	hydrolase activity|biological_process|cellular_component|carboxylic ester hydrolase activity|hydrolase activity|biological_process|cellular_component|carboxylic ester hydrolase activity	Insufficient genetic data for FlyBase to solicit a summary. [Date last reviewed: 2016-06-30]	-	CG3841	-	-	-	-
FBgn0054049	220.844	0.685205	0.139996	4.89447	9.85723e-07	0.000159136	CG34049	protein_coding	GO:0005576|GO:0005615|GO:0003674|GO:0008150|GO:0005575	extracellular region|extracellular space|molecular_function|biological_process|cellular_component	Insufficient genetic data for FlyBase to solicit a summary. [Date last reviewed: 2016-06-30]	-	CG34049	-	-	-	-
FBgn0053532	426.888	-0.84436	0.172678	-4.8898	1.0094e-06	0.000161225	lectin-37Da	protein_coding	GO:0046872|GO:0005576|GO:0016339|GO:0005534|GO:0030246|GO:0046872|GO:0005576|GO:0016339|GO:0005534|GO:0030246	metal ion binding|extracellular region|calcium-dependent cell-cell adhesion via plasma membrane cell adhesion molecules|galactose binding|carbohydrate binding|metal ion binding|extracellular region|calcium-dependent cell-cell adhesion via plasma membrane cell adhesion molecules|galactose binding|carbohydrate binding	Insufficient genetic data for FlyBase to solicit a summary. [Date last reviewed: 2016-06-30]	lectin-37Da	lectin-37Da	Galactose-specific lectin that displays calcium-dependent activity (PubMed:16475980, PubMed:17287021). Binds to the surface of hemocytes and enhances hemocyte encapsulation and melanization (PubMed:17287021). This is likely by interacting with carbohydrates on the surface of the hemocytes (PubMed:17287021). Also displays agglutination activity against the Gram-negative bacterium E.coli (PubMed:17…	-	-	-
FBgn0267681	27.5408	-2.36419	0.489361	-4.83117	1.35734e-06	0.000214517	lncRNA:CR46017	ncRNA			-	long non-coding RNA:CR46017	lncRNA:CR46017	-	-	-	-
FBgn0259963	127.952	0.909135	0.189161	4.80613	1.53878e-06	0.000240659	Sfp33A2	protein_coding	GO:0005615|GO:0032504|GO:0003674	extracellular space|multicellular organism reproduction|molecular_function	-	Seminal fluid protein 33A2	Sfp33A2	-	-	-	-
FBgn0036467	70.4349	-1.21319	0.252678	-4.80134	1.57607e-06	0.00024395	CG12310	protein_coding			Insufficient genetic data for FlyBase to solicit a summary. [Date last reviewed: 2016-06-30]	-	CG12310	-	-	-	-
FBgn0039323	83.1522	-1.07264	0.223882	-4.79111	1.6586e-06	0.000254104	CG10559	protein_coding			Insufficient genetic data for FlyBase to solicit a summary. [Date last reviewed: 2016-06-30]	-	CG10559	-	-	-	-
FBgn0263405	55.5263	-1.75735	0.367689	-4.77944	1.75788e-06	0.000266594	lncRNA:CR43451	ncRNA			-	long non-coding RNA:CR43451	lncRNA:CR43451	-	-	-	-
FBgn0035216	323.856	0.674046	0.14171	4.75651	1.96967e-06	0.000295727	CG9168	protein_coding	GO:0005615|GO:0032504|GO:0003824	extracellular space|multicellular organism reproduction|catalytic activity	Insufficient genetic data for FlyBase to solicit a summary. [Date last reviewed: 2016-06-30]	-	CG9168	-	-	-	-
FBgn0267457	214.898	0.727852	0.153801	4.73242	2.21856e-06	0.000324176	asRNA:CR45807	ncRNA			-	antisense RNA:CR45807	asRNA:CR45807	-	-	-	-
FBgn0010425	6921.04	-0.719738	0.152092	-4.73226	2.22037e-06	0.000324176	epsilonTry	protein_coding	GO:0006508|GO:0004252|GO:0005615|GO:0008236|GO:0016787|GO:0008233|GO:0005576	proteolysis|serine-type endopeptidase activity|extracellular space|serine-type peptidase activity|hydrolase activity|peptidase activity|extracellular region	Insufficient genetic data for FlyBase to solicit a summary. [Date last reviewed: 2016-06-30]	epsilonTrypsin	epsilonTry	-	Belongs to the peptidase S1 family.	-	-
FBgn0053296	79.2629	0.999889	0.211399	4.72986	2.24679e-06	0.000324176	CG33296	protein_coding	GO:0016021|GO:0005886|GO:0006836|GO:0005328|GO:0043005|GO:0005332|GO:0042165|GO:0016020|GO:0015293|GO:0055085|GO:0015812|GO:0016021|GO:0005886|GO:0006836|GO:0005328|GO:0043005|GO:0005332|GO:0042165|GO:0016020|GO:0015293|GO:0055085|GO:0015812	integral component of membrane|plasma membrane|neurotransmitter transport|neurotransmitter:sodium symporter activity|neuron projection|gamma-aminobutyric acid:sodium symporter activity|neurotransmitter binding|membrane|symporter activity|transmembrane transport|gamma-aminobutyric acid transport|integral component of membrane|plasma membrane|neurotransmitter transport|neurotransmitter:sodium sympo…	Insufficient genetic data for FlyBase to solicit a summary. [Date last reviewed: 2016-06-30]	-	CG33296	-	-	-	-
FBgn0267540	47.8261	1.29297	0.27347	4.72803	2.26712e-06	0.000324176	lncRNA:CR45880	ncRNA			-	long non-coding RNA:CR45880	lncRNA:CR45880	-	-	-	-
FBgn0267543	47.8261	1.29297	0.27347	4.72803	2.26712e-06	0.000324176	lncRNA:CR45883	ncRNA			-	long non-coding RNA:CR45883	lncRNA:CR45883	-	-	-	-
FBgn0042201	7757.84	0.882194	0.187025	4.71698	2.39375e-06	0.000339014	Nplp3	protein_coding	GO:0005576|GO:0005184|GO:0007218	extracellular region|neuropeptide hormone activity|neuropeptide signaling pathway	-	Neuropeptide-like precursor 3	Nplp3	-	-	-	-
FBgn0266150	18.944	-2.59878	0.551162	-4.71509	2.41604e-06	0.000339014	lncRNA:CR44856	ncRNA			-	long non-coding RNA:CR44856	lncRNA:CR44856	-	-	-	-
FBgn0264840	183.83	-0.815118	0.17306	-4.71002	2.47687e-06	0.000342821	lncRNA:CR44048	ncRNA			-	long non-coding RNA:CR44048	lncRNA:CR44048	-	-	-	-
FBgn0261930	360.157	-0.572341	0.121541	-4.70904	2.48884e-06	0.000342821	vnd	protein_coding	GO:0003677|GO:0005634|GO:0006355|GO:0043565|GO:0006357|GO:0000981|GO:0003677|GO:0005634|GO:0007417|GO:0003700|GO:0000981|GO:0045944|GO:0007419|GO:0000122|GO:0006357|GO:0006355|GO:0030154|GO:0010629|GO:0043565|GO:0008134|GO:0007400|GO:0021782|GO:0007420|GO:0000978|GO:0007398|GO:0009953|GO:0014019|GO:0007389|GO:0007275|GO:0007399	DNA binding|nucleus|regulation of transcription, DNA-templated|sequence-specific DNA binding|regulation of transcription by RNA polymerase II|DNA-binding transcription factor activity, RNA polymerase II-specific|DNA binding|nucleus|central nervous system development|DNA-binding transcription factor activity|DNA-binding transcription factor activity, RNA polymerase II-specific|positive regulation …	ventral nervous system defective (vnd) encodes a Nk2-class homeodomain transcription factor that acts in a context-dependent manner as an activator or repressor. It has roles in neuroectoderm patterning, formation and specification of ventral neuroblasts and proper development of their cell lineages. [Date last reviewed: 2019-03-21]	ventral nervous system defective	vnd	Probable transcriptional regulator involved in the regulation of the proneural AS-C genes and the neurogenic genes of the enhancer of split complex. Could specifically activate proneural genes in the ventral-most neuroectoderm.	Belongs to the NK-2 homeobox family.	-	-
FBgn0030482	1707.03	0.443739	0.0950149	4.6702	3.00901e-06	0.000410703	CG1673	protein_coding	GO:0005737|GO:0005739|GO:0003824|GO:0004084|GO:0009099|GO:0052654|GO:0052655|GO:0009082|GO:0052656|GO:0009098|GO:0016740|GO:0008652|GO:0008483|GO:0009081	cytoplasm|mitochondrion|catalytic activity|branched-chain-amino-acid transaminase activity|valine biosynthetic process|L-leucine transaminase activity|L-valine transaminase activity|branched-chain amino acid biosynthetic process|L-isoleucine transaminase activity|leucine biosynthetic process|transferase activity|cellular amino acid biosynthetic process|transaminase activity|branched-chain amino a…	Insufficient genetic data for FlyBase to solicit a summary. [Date last reviewed: 2016-06-30]	-	CG1673	-	-	-	-
FBgn0267636	35.1416	-1.43896	0.308369	-4.66637	3.06566e-06	0.000414665	asRNA:CR45974	ncRNA			-	antisense RNA:CR45974	asRNA:CR45974	-	-	-	-
FBgn0259896	172.718	1.02476	0.22095	4.63799	3.51813e-06	0.000470335	NimC1	protein_coding	GO:0016021|GO:0005886|GO:0042742|GO:0006909|GO:0016020|GO:0003674|GO:0005515|GO:0016021|GO:0005886|GO:0042742|GO:0006909|GO:0016020|GO:0003674|GO:0005515|GO:0016021|GO:0005886|GO:0042742|GO:0006909|GO:0016020|GO:0003674|GO:0005515	integral component of membrane|plasma membrane|defense response to bacterium|phagocytosis|membrane|molecular_function|protein binding|integral component of membrane|plasma membrane|defense response to bacterium|phagocytosis|membrane|molecular_function|protein binding|integral component of membrane|plasma membrane|defense response to bacterium|phagocytosis|membrane|molecular_function|protein bindi…	-	Nimrod C1	NimC1	-	-	-	-
FBgn0051021	476.246	0.565119	0.121879	4.63672	3.53989e-06	0.000470335	CG31021	protein_coding	GO:0005783|GO:0055114|GO:0018401|GO:0016702|GO:0004656|GO:0016491|GO:0005515	endoplasmic reticulum|oxidation-reduction process|peptidyl-proline hydroxylation to 4-hydroxy-L-proline|oxidoreductase activity, acting on single donors with incorporation of molecular oxygen, incorporation of two atoms of oxygen|procollagen-proline 4-dioxygenase activity|oxidoreductase activity|protein binding	-	-	CG31021	-	-	-	-
FBgn0002570	13654.1	-1.14945	0.248434	-4.62679	3.7137e-06	0.000489101	Mal-A1	protein_coding	GO:0003824|GO:0005975|GO:0032450|GO:0004558|GO:0016787|GO:0008152|GO:0016798|GO:0090599|GO:0000023	catalytic activity|carbohydrate metabolic process|maltose alpha-glucosidase activity|alpha-1,4-glucosidase activity|hydrolase activity|metabolic process|hydrolase activity, acting on glycosyl bonds|alpha-glucosidase activity|maltose metabolic process	Insufficient genetic data for FlyBase to solicit a summary. [Date last reviewed: 2016-06-30]	Maltase A1	Mal-A1	-	Belongs to the glycosyl hydrolase 13 family.	-	-
FBgn0264474	15.8148	-2.32256	0.503059	-4.61688	3.89553e-06	0.000508586	lncRNA:CR43882	ncRNA			-	long non-coding RNA:CR43882	lncRNA:CR43882	-	-	-	-
FBgn0267757	24.7844	-2.27067	0.492388	-4.61155	3.99672e-06	0.000517299	lncRNA:CR46088	ncRNA			-	long non-coding RNA:CR46088	lncRNA:CR46088	-	-	-	-
FBgn0286914	6.64879	6.15766	1.33819	4.60147	4.19517e-06	0.000538345	lncRNA:CR46414	ncRNA
FBgn0033097	34.1899	1.47982	0.32303	4.58108	4.62591e-06	0.000588588	Zip42C.2	protein_coding	GO:0016021|GO:0005886|GO:0055085|GO:0046873|GO:0016324|GO:0016020|GO:0016323|GO:0005385|GO:0010312|GO:0071577|GO:0071578|GO:0030001	integral component of membrane|plasma membrane|transmembrane transport|metal ion transmembrane transporter activity|apical plasma membrane|membrane|basolateral plasma membrane|zinc ion transmembrane transporter activity|detoxification of zinc ion|zinc ion transmembrane transport|zinc ion import across plasma membrane|metal ion transport	Zinc/iron regulated transporter-related protein 42C.2 (Zip42C.2) encodes a protein involved in zinc detoxification and zinc transmembrane import. [Date last reviewed: 2019-09-12]	Zinc/iron regulated transporter-related protein 42C.2	Zip42C.2	-	-	-	-
FBgn0264897	353.738	0.656205	0.14338	4.57669	4.72379e-06	0.000595992	CG44088	protein_coding	GO:0003674|GO:0008150|GO:0005575	molecular_function|biological_process|cellular_component	Insufficient genetic data for FlyBase to solicit a summary. [Date last reviewed: 2016-10-13]	-	CG44088	-	-	-	-
FBgn0037408	102.773	0.843233	0.184474	4.57101	4.85378e-06	0.000607288	NPFR	protein_coding	GO:0016021|GO:0007186|GO:0004930|GO:0004983|GO:0016020|GO:0007165|GO:0007218|GO:0016021|GO:0007186|GO:0004930|GO:0004983|GO:0016020|GO:0007165|GO:0007218|GO:0016021|GO:0007186|GO:0004930|GO:0004983|GO:0016020|GO:0007165|GO:0007218|GO:0016021|GO:0005887|GO:0007186|GO:0004930|GO:0007218|GO:0008188|GO:0042048|GO:1990834|GO:0030536|GO:0004983|GO:0038002|GO:0042263|GO:0007217|GO:0004995|GO:0007194|GO:…	integral component of membrane|G protein-coupled receptor signaling pathway|G protein-coupled receptor activity|neuropeptide Y receptor activity|membrane|signal transduction|neuropeptide signaling pathway|integral component of membrane|G protein-coupled receptor signaling pathway|G protein-coupled receptor activity|neuropeptide Y receptor activity|membrane|signal transduction|neuropeptide signali…	-	Neuropeptide F receptor	NPFR	Receptor for NPF. Integral part of the sensory system that mediates food signaling, providing the neural basis for the regulation of food response; coordinates larval foraging and social behavior changes during development. Required in dopaminergic (DA) neurons that innervate the mushroom body for satiety to suppress appetitive memory performance; a key factor in the internal state of hunger in t…	Belongs to the G-protein coupled receptor 1 family.	-	-
FBgn0034477	901.906	-0.441339	0.0966309	-4.56726	4.94134e-06	0.00060982	CG13872	protein_coding			Insufficient genetic data for FlyBase to solicit a summary. [Date last reviewed: 2016-06-30]	-	CG13872	-	-	-	-
FBgn0267706	37.0313	-2.10867	0.461752	-4.56667	4.95524e-06	0.00060982	lncRNA:CR46039	ncRNA			-	long non-coding RNA:CR46039	lncRNA:CR46039	-	-	-	-
FBgn0286030	103.007	-1.11732	0.244886	-4.56262	5.052e-06	0.000616591	lncRNA:CR46350	ncRNA			-	long non-coding RNA:CR46350	lncRNA:CR46350	-	-	-	-
FBgn0085356	367.596	0.5878	0.128877	4.56094	5.0924e-06	0.000616591	CG34327	protein_coding	GO:0003674|GO:0008150|GO:0005575	molecular_function|biological_process|cellular_component	Insufficient genetic data for FlyBase to solicit a summary. [Date last reviewed: 2016-10-13]	-	CG34327	-	-	-	-
FBgn0004228	429.967	-0.558934	0.1226	-4.559	5.13989e-06	0.000617363	mex1	protein_coding	GO:0016021|GO:0007275|GO:0016020|GO:0016021|GO:0007275|GO:0016020|GO:0016021|GO:0016020	integral component of membrane|multicellular organism development|membrane|integral component of membrane|multicellular organism development|membrane|integral component of membrane|membrane	-	midgut expression 1	mex1	Involved in morphogenesis and development.	-	-	-
FBgn0033864	924.133	-0.434801	0.0955647	-4.54981	5.36952e-06	0.000637414	CG18368	protein_coding	GO:0003674|GO:0008150|GO:0005575	molecular_function|biological_process|cellular_component	Insufficient genetic data for FlyBase to solicit a summary. [Date last reviewed: 2016-10-13]	-	CG18368	-	-	-	-
FBgn0265070	306.924	-0.60768	0.133587	-4.54894	5.39174e-06	0.000637414	asRNA:CR44181	ncRNA			-	antisense RNA:CR44181	asRNA:CR44181	-	-	-	-
FBgn0050043	98.0792	0.839284	0.184649	4.54528	5.4861e-06	0.000643503	CG30043	protein_coding	GO:0016021|GO:0006508|GO:0016020	integral component of membrane|proteolysis|membrane	Insufficient genetic data for FlyBase to solicit a summary. [Date last reviewed: 2016-06-30]	-	CG30043	-	-	-	-
FBgn0029662	289.325	-0.587702	0.130143	-4.51583	6.30705e-06	0.000734062	CG12206	protein_coding	GO:0005623|GO:0009055|GO:0045454|GO:0015035|GO:0022900|GO:0055114|GO:0003674|GO:0008150|GO:0005575|GO:0005623|GO:0009055|GO:0045454|GO:0015035|GO:0022900|GO:0055114|GO:0003674|GO:0008150|GO:0005575|GO:0005623|GO:0009055|GO:0045454|GO:0015035|GO:0022900|GO:0055114|GO:0003674|GO:0008150|GO:0005575	cell|electron transfer activity|cell redox homeostasis|protein disulfide oxidoreductase activity|electron transport chain|oxidation-reduction process|molecular_function|biological_process|cellular_component|cell|electron transfer activity|cell redox homeostasis|protein disulfide oxidoreductase activity|electron transport chain|oxidation-reduction process|molecular_function|biological_process|cell…	-	-	CG12206	-	Belongs to the GRXCR1 family.	-	-
FBgn0034390	555.544	0.698383	0.155321	4.49639	6.91179e-06	0.00079151	CG15093	protein_coding	GO:0055114|GO:0005739|GO:0016491|GO:0006520|GO:0051287|GO:0050661|GO:0008442|GO:0006574|GO:0009083|GO:0016616|GO:0055114|GO:0005739|GO:0016491|GO:0006520|GO:0051287|GO:0050661|GO:0008442|GO:0006574|GO:0009083|GO:0016616|GO:0055114|GO:0005739|GO:0016491|GO:0006520|GO:0051287|GO:0050661|GO:0008442|GO:0006574|GO:0009083|GO:0016616	oxidation-reduction process|mitochondrion|oxidoreductase activity|cellular amino acid metabolic process|NAD binding|NADP binding|3-hydroxyisobutyrate dehydrogenase activity|valine catabolic process|branched-chain amino acid catabolic process|oxidoreductase activity, acting on the CH-OH group of donors, NAD or NADP as acceptor|oxidation-reduction process|mitochondrion|oxidoreductase activity|cellu…	-	-	CG15093	-	Belongs to the HIBADH-related family. 3-hydroxyisobutyrate dehydrogenase subfamily.	-	Amino-acid degradation; L-valine degradation.
FBgn0262007	1164.32	-0.710309	0.157996	-4.49576	6.93234e-06	0.00079151	CG42825	protein_coding	GO:0016021|GO:0055085|GO:0022857|GO:0016020	integral component of membrane|transmembrane transport|transmembrane transporter activity|membrane	Insufficient genetic data for FlyBase to solicit a summary. [Date last reviewed: 2016-06-30]	-	CG42825	-	-	-	-
FBgn0054040	681.821	-2.10778	0.469089	-4.49335	7.01118e-06	0.00079151	CG34040	protein_coding	GO:0003674|GO:0008150|GO:0005575	molecular_function|biological_process|cellular_component	Insufficient genetic data for FlyBase to solicit a summary. [Date last reviewed: 2016-06-30]	-	CG34040	-	-	-	-
FBgn0085476	290.038	0.632003	0.140653	4.49334	7.01151e-06	0.00079151	CG34447	protein_coding	GO:0005615|GO:0016042|GO:0016298|GO:0052689|GO:0006629|GO:0005575|GO:0016787|GO:0005576|GO:0080030|GO:0004806|GO:0005615|GO:0016042|GO:0016298|GO:0052689|GO:0006629|GO:0005575|GO:0016787|GO:0005576|GO:0080030|GO:0004806	extracellular space|lipid catabolic process|lipase activity|carboxylic ester hydrolase activity|lipid metabolic process|cellular_component|hydrolase activity|extracellular region|methyl indole-3-acetate esterase activity|triglyceride lipase activity|extracellular space|lipid catabolic process|lipase activity|carboxylic ester hydrolase activity|lipid metabolic process|cellular_component|hydrolase …	Insufficient genetic data for FlyBase to solicit a summary. [Date last reviewed: 2016-06-30]	-	CG34447	-	-	-	-
FBgn0032286	302.638	-0.600824	0.133823	-4.4897	7.13251e-06	0.000793468	CG7300	protein_coding			Insufficient genetic data for FlyBase to solicit a summary. [Date last reviewed: 2016-06-30]	-	CG7300	-	-	-	-
FBgn0264726	173.774	1.07478	0.239391	4.48963	7.13455e-06	0.000793468	lncRNA:CR43994	ncRNA			-	long non-coding RNA:CR43994	lncRNA:CR43994	-	-	-	-
FBgn0002571	983.311	-0.906195	0.20334	-4.45656	8.32864e-06	0.000919458	Mal-A3	protein_coding	GO:0003824|GO:0005975|GO:0032450|GO:0004558|GO:0016787|GO:0008152|GO:0016798|GO:0090599|GO:0000023	catalytic activity|carbohydrate metabolic process|maltose alpha-glucosidase activity|alpha-1,4-glucosidase activity|hydrolase activity|metabolic process|hydrolase activity, acting on glycosyl bonds|alpha-glucosidase activity|maltose metabolic process	Insufficient genetic data for FlyBase to solicit a summary. [Date last reviewed: 2016-06-30]	Maltase A3	Mal-A3	-	Belongs to the glycosyl hydrolase 13 family.	-	-
FBgn0033702	119.003	0.86056	0.193196	4.45434	8.41531e-06	0.000922245	CG8854	protein_coding	GO:0003674|GO:0008150|GO:0005575|GO:0003674|GO:0008150|GO:0005575	molecular_function|biological_process|cellular_component|molecular_function|biological_process|cellular_component	Insufficient genetic data for FlyBase to solicit a summary. [Date last reviewed: 2016-10-13]	-	CG8854	-	-	-	-
FBgn0033294	894.645	-0.970196	0.218215	-4.44605	8.74649e-06	0.000951592	Mal-A4	protein_coding	GO:0003824|GO:0005975|GO:0032450|GO:0016787|GO:0008152|GO:0016798|GO:0004558|GO:0090599|GO:0000023	catalytic activity|carbohydrate metabolic process|maltose alpha-glucosidase activity|hydrolase activity|metabolic process|hydrolase activity, acting on glycosyl bonds|alpha-1,4-glucosidase activity|alpha-glucosidase activity|maltose metabolic process	Insufficient genetic data for FlyBase to solicit a summary. [Date last reviewed: 2016-06-30]	Maltase A4	Mal-A4	-	-	-	-
FBgn0031957	14.4422	2.60925	0.587089	4.44438	8.81457e-06	0.000952101	TwdlE	protein_coding	GO:0031012|GO:0040003|GO:0005214	extracellular matrix|chitin-based cuticle development|structural constituent of chitin-based cuticle	TweedleE (TwdlE) is one of 27 related insect-specific genes with a conserved domain, DUF243. TwdlE overexpression causes a Tubby-like phenotype similar to a mutant in the related TwdlD. [Date last reviewed: 2019-03-14]	TweedleE	TwdlE	-	-	-	-
FBgn0264679	465.142	0.690733	0.155897	4.43071	9.39225e-06	0.00100725	asRNA:CR43964	ncRNA			-	antisense RNA:CR43964	asRNA:CR43964	-	-	-	-
FBgn0265683	25.4432	-1.7568	0.396838	-4.42699	9.55579e-06	0.00101752	lncRNA:CR44490	ncRNA			-	long non-coding RNA:CR44490	lncRNA:CR44490	-	-	-	-
FBgn0014019	622.934	0.54281	0.122805	4.42008	9.86644e-06	0.0010432	Rh5	protein_coding	GO:0016021|GO:0005887|GO:0007602|GO:0007601|GO:0007186|GO:0004930|GO:0016028|GO:0007605|GO:0009416|GO:0043153|GO:0043052|GO:0071482|GO:0009881|GO:0018298|GO:0008020|GO:0009588|GO:0016038|GO:0016020|GO:0007165|GO:0050896|GO:0009584|GO:0016021|GO:0005887|GO:0007602|GO:0007601|GO:0007186|GO:0004930|GO:0016028|GO:0007605|GO:0009416|GO:0043153|GO:0043052|GO:0071482|GO:0009881|GO:0018298|GO:0008020|GO:…	integral component of membrane|integral component of plasma membrane|phototransduction|visual perception|G protein-coupled receptor signaling pathway|G protein-coupled receptor activity|rhabdomere|sensory perception of sound|response to light stimulus|entrainment of circadian clock by photoperiod|thermotaxis|cellular response to light stimulus|photoreceptor activity|protein-chromophore linkage|G …	Rhodopsin 5 (Rh5) encodes a visual GPCR opsin that covalently binds the chromophore retinal. A photon of light stimulates the isomerization of retinal resulting in a conformational change in the product of Rh5 and signal activation. Its peak sensitivity is in the blue and it is expressed in a subclass of R8 photoreceptors. [Date last reviewed: 2019-03-14]	Rhodopsin 5	Rh5	Visual pigments are the light-absorbing molecules that mediate vision. They consist of an apoprotein, opsin, covalently linked to cis-retinal.	Belongs to the G-protein coupled receptor 1 family. Opsin subfamily.	-	-
FBgn0015946	36.5933	-1.32589	0.302072	-4.38933	1.13702e-05	0.0011914	grim	protein_coding	GO:0005737|GO:0005739|GO:0008340|GO:0042803|GO:0006915|GO:0012501|GO:0043065|GO:0035006|GO:0035193|GO:0010623|GO:0097190|GO:2001272|GO:0043524|GO:0043068|GO:1901216|GO:0008627|GO:0005634|GO:0005886	cytoplasm|mitochondrion|determination of adult lifespan|protein homodimerization activity|apoptotic process|programmed cell death|positive regulation of apoptotic process|melanization defense response|larval central nervous system remodeling|programmed cell death involved in cell development|apoptotic signaling pathway|positive regulation of cysteine-type endopeptidase activity involved in execut…	grim (grim) encodes a member of the inhibitor of apoptotic protein antagonists. In response to death signals, it induces apoptosis of cells in the central nervous system. It is important particularly for the apoptosis of specific juvenile neurons during metamorphosis. [Date last reviewed: 2019-03-07]	grim	grim	Activator of apoptosis, independent of rpr and hid, that acts on the effector Dredd.	-	Interacts with Diap2 (via BIR2 domain).	-
FBgn0034330	547.971	-0.762336	0.173722	-4.38825	1.14267e-05	0.0011914	CG18107	protein_coding	GO:0005576	extracellular region	Insufficient genetic data for FlyBase to solicit a summary. [Date last reviewed: 2016-06-30]	Bomanin Short 4	BomS4	-	-	-	-
FBgn0052751	25.2096	2.18847	0.500511	4.37248	1.22846e-05	0.00127201	CG32751	protein_coding	GO:0016811|GO:0006807|GO:0016811|GO:0006807|GO:0008150|GO:0005575|GO:0016787|GO:0005576	hydrolase activity, acting on carbon-nitrogen (but not peptide) bonds, in linear amides|nitrogen compound metabolic process|hydrolase activity, acting on carbon-nitrogen (but not peptide) bonds, in linear amides|nitrogen compound metabolic process|biological_process|cellular_component|hydrolase activity|extracellular region	Insufficient genetic data for FlyBase to solicit a summary. [Date last reviewed: 2016-06-30]	-	CG32751	Probable hydrolase.	Belongs to the carbon-nitrogen hydrolase superfamily. BTD/VNN family.	-	-
FBgn0039778	984.101	-0.861542	0.19713	-4.37043	1.24e-05	0.00127516	Jon99Fi	protein_coding	GO:0006508|GO:0004252|GO:0016787|GO:0008233|GO:0008236	proteolysis|serine-type endopeptidase activity|hydrolase activity|peptidase activity|serine-type peptidase activity	Insufficient genetic data for FlyBase to solicit a summary. [Date last reviewed: 2016-06-30]	Jonah 99Fi	Jon99Fi	-	-	-	-
FBgn0036154	1344.59	0.41073	0.0943056	4.35531	1.32878e-05	0.00135716	CG6168	protein_coding	GO:0006508|GO:0008270|GO:0005615|GO:0032504|GO:0004222|GO:0050829|GO:0017186|GO:0016603|GO:0016740|GO:0016787|GO:0016746|GO:0006508|GO:0008270|GO:0005615|GO:0032504|GO:0004222|GO:0050829|GO:0017186|GO:0016603|GO:0016740|GO:0016787|GO:0016746	proteolysis|zinc ion binding|extracellular space|multicellular organism reproduction|metalloendopeptidase activity|defense response to Gram-negative bacterium|peptidyl-pyroglutamic acid biosynthetic process, using glutaminyl-peptide cyclotransferase|glutaminyl-peptide cyclotransferase activity|transferase activity|hydrolase activity|transferase activity, transferring acyl groups|proteolysis|zinc …	CG6168 encodes a predicted metalloendopeptidase that is produced by the male accessory glands. CG6168 ectopic expression in females provides anti-microbial protection. [Date last reviewed: 2019-03-07]	-	CG6168	-	-	-	-
FBgn0040001	4854.3	0.531887	0.122301	4.349	1.36757e-05	0.00137975	FASN3	protein_coding	GO:0003824|GO:0016491|GO:0016740|GO:0016788|GO:0009058|GO:0004312|GO:0031177|GO:0016787|GO:0055114|GO:0016746|GO:0008152|GO:0016829|GO:0006631|GO:0006633|GO:0004314|GO:0016419|GO:0004313|GO:0004315|GO:0004316|GO:0004317|GO:0004320|GO:0008659|GO:0008693|GO:0016295|GO:0016296|GO:0016297|GO:0016418|GO:0019171|GO:0047117|GO:0047451|GO:0102131|GO:0102132	catalytic activity|oxidoreductase activity|transferase activity|hydrolase activity, acting on ester bonds|biosynthetic process|fatty acid synthase activity|phosphopantetheine binding|hydrolase activity|oxidation-reduction process|transferase activity, transferring acyl groups|metabolic process|lyase activity|fatty acid metabolic process|fatty acid biosynthetic process|[acyl-carrier-protein] S-mal…
FBgn0016075	1436.59	0.697001	0.160277	4.34873	1.36927e-05	0.00137975	vkg	protein_coding	GO:0005737|GO:0071711|GO:0005604|GO:0005615|GO:0031012|GO:0062023|GO:0007443|GO:0005201|GO:0030198|GO:0005587|GO:0007519|GO:0061327|GO:0005581|GO:0016020|GO:0007525|GO:0005737|GO:0071711|GO:0005604|GO:0005615|GO:0031012|GO:0062023|GO:0007443|GO:0005201|GO:0030198|GO:0005587|GO:0007519|GO:0061327|GO:0005581|GO:0016020|GO:0007525|GO:0005515|GO:0005737|GO:0071711|GO:0005604|GO:0005615|GO:0031012|GO:…	cytoplasm|basement membrane organization|basement membrane|extracellular space|extracellular matrix|collagen-containing extracellular matrix|Malpighian tubule morphogenesis|extracellular matrix structural constituent|extracellular matrix organization|collagen type IV trimer|skeletal muscle tissue development|anterior Malpighian tubule development|collagen trimer|membrane|somatic muscle developmen…	viking (vkg) encodes a subunit of Collagen IV and a major component of basement membranes. It is secreted by haemocytes and fat body cells and is required for the normal morphogenesis of many tissues. It also contributes to TGF-beta signalling in the early embryo and the developing Malpighian tubules. [Date last reviewed: 2019-03-21]	viking	vkg	-	-	-	-
FBgn0061188	81.4125	0.89114	0.205266	4.3414	1.41577e-05	0.00141315	lncRNA:Yu	ncRNA			-	long non-coding RNA:Yu	lncRNA:Yu	-	-	-	-
FBgn0028987	6539.72	0.372784	0.0858839	4.34055	1.42124e-05	0.00141315	Spn28F	protein_coding	GO:0005576|GO:0005615|GO:0032504|GO:0004867|GO:0045861|GO:0010951|GO:0042562|GO:0030414|GO:0010466	extracellular region|extracellular space|multicellular organism reproduction|serine-type endopeptidase inhibitor activity|negative regulation of proteolysis|negative regulation of endopeptidase activity|hormone binding|peptidase inhibitor activity|negative regulation of peptidase activity	Serpin 28F (Spn28F) encodes a predicted serine protease inhibitor. It is expressed in the male accessory glands and transferred to females during mating. [Date last reviewed: 2019-03-14]	Serpin 28F	Spn28F	-	-	-	-
FBgn0031184	529.684	0.43504	0.10035	4.33525	1.45596e-05	0.00143814	CG14615	protein_coding	GO:0016747|GO:0016740|GO:0016746|GO:0016747|GO:0016740|GO:0016746	transferase activity, transferring acyl groups other than amino-acyl groups|transferase activity|transferase activity, transferring acyl groups|transferase activity, transferring acyl groups other than amino-acyl groups|transferase activity|transferase activity, transferring acyl groups	Insufficient genetic data for FlyBase to solicit a summary. [Date last reviewed: 2016-06-30]	-	CG14615	-	-	-	-
FBgn0023197	46.1143	-1.31395	0.303402	-4.33072	1.48623e-05	0.00145398	Jon74E	protein_coding	GO:0006508|GO:0004252|GO:0016787|GO:0008233|GO:0008236	proteolysis|serine-type endopeptidase activity|hydrolase activity|peptidase activity|serine-type peptidase activity	Insufficient genetic data for FlyBase to solicit a summary. [Date last reviewed: 2016-06-30]	Jonah 74E	Jon74E	-	-	-	-
FBgn0265186	235.237	-0.652667	0.150733	-4.32996	1.49136e-05	0.00145398	CG44251	protein_coding	GO:0003674|GO:0008150|GO:0005575|GO:0003674|GO:0008150|GO:0005575	molecular_function|biological_process|cellular_component|molecular_function|biological_process|cellular_component	Insufficient genetic data for FlyBase to solicit a summary. [Date last reviewed: 2016-06-30]	-	CG44251	-	-	-	-
FBgn0266380	5.54386	-5.9453	1.37355	-4.32841	1.50188e-05	0.00145479	lncRNA:CR45022	ncRNA			-	long non-coding RNA:CR45022	lncRNA:CR45022	-	-	-	-
FBgn0038098	190.504	-0.647926	0.149826	-4.32452	1.52865e-05	0.00147123	CG7381	protein_coding	GO:0016021|GO:0016020|GO:0003674|GO:0008150|GO:0005575|GO:0016021|GO:0016020|GO:0003674|GO:0008150|GO:0005575|GO:0016021|GO:0016020|GO:0003674|GO:0008150|GO:0005575|GO:0016021|GO:0016020|GO:0003674|GO:0008150|GO:0005575|GO:0016021|GO:0016020|GO:0003674|GO:0008150|GO:0005575	integral component of membrane|membrane|molecular_function|biological_process|cellular_component|integral component of membrane|membrane|molecular_function|biological_process|cellular_component|integral component of membrane|membrane|molecular_function|biological_process|cellular_component|integral component of membrane|membrane|molecular_function|biological_process|cellular_component|integral co…	Insufficient genetic data for FlyBase to solicit a summary. [Date last reviewed: 2016-10-13]	-	CG7381	-	-	-	-
FBgn0003961	480.521	0.953442	0.220766	4.31878	1.56891e-05	0.00150036	Uro	protein_coding	GO:0055114|GO:0005777|GO:0006144|GO:0004846|GO:0019428|GO:0019628|GO:0016491	oxidation-reduction process|peroxisome|purine nucleobase metabolic process|urate oxidase activity|allantoin biosynthetic process|urate catabolic process|oxidoreductase activity	-	Urate oxidase	Uro	Catalyzes the oxidation of uric acid to 5-hydroxyisourate, which is further processed to form (S)-allantoin.	Belongs to the uricase family.	-	Purine metabolism; urate degradation; (S)-allantoin from urate: step 1/3.
FBgn0016660	46.1383	1.17528	0.27303	4.3046	1.6729e-05	0.00158968	H15	protein_coding	GO:0003677|GO:0005634|GO:0003700|GO:0045944|GO:0007507|GO:0006355|GO:0035050|GO:0030381|GO:0042659|GO:0035223|GO:0003015|GO:0042684|GO:0001228|GO:0000122|GO:0000977|GO:0001708|GO:0001102|GO:0003677|GO:0005634|GO:0003700|GO:0006355	DNA binding|nucleus|DNA-binding transcription factor activity|positive regulation of transcription by RNA polymerase II|heart development|regulation of transcription, DNA-templated|embryonic heart tube development|chorion-containing eggshell pattern formation|regulation of cell fate specification|leg disc pattern formation|heart process|cardioblast cell fate commitment|DNA-binding transcription a…	H15 (H15) encodes a T-box transcription factor that regulates the specification of cell fate in the heart and central nervous system. [Date last reviewed: 2019-07-11]	H15	H15	-	-	-	-
FBgn0038952	2384.36	-0.350962	0.0816172	-4.30009	1.70726e-05	0.00161212	CG7069	protein_coding	GO:0005737|GO:0005886|GO:0003824|GO:0006096|GO:0016301|GO:0000287|GO:0006090|GO:0032869|GO:0030955|GO:0004743|GO:0000166|GO:0005524|GO:0016740|GO:0016310|GO:0046872	cytoplasm|plasma membrane|catalytic activity|glycolytic process|kinase activity|magnesium ion binding|pyruvate metabolic process|cellular response to insulin stimulus|potassium ion binding|pyruvate kinase activity|nucleotide binding|ATP binding|transferase activity|phosphorylation|metal ion binding	Insufficient genetic data for FlyBase to solicit a summary. [Date last reviewed: 2016-06-30]	-	CG7069	-	-	-	-
FBgn0265728	4.8612	-5.74681	1.33804	-4.29496	1.74726e-05	0.00163958	lncRNA:CR44535	ncRNA			-	long non-coding RNA:CR44535	lncRNA:CR44535	-	-	-	-
FBgn0039114	2387.34	0.617909	0.144154	4.28645	1.81555e-05	0.00169308	Lsd-1	protein_coding	GO:0005737|GO:0005811|GO:0034389|GO:0010883|GO:0019915|GO:0006869|GO:0006642|GO:0010898|GO:1990044|GO:0032994|GO:0005829|GO:0010890	cytoplasm|lipid droplet|lipid droplet organization|regulation of lipid storage|lipid storage|lipid transport|triglyceride mobilization|positive regulation of triglyceride catabolic process|protein localization to lipid droplet|protein-lipid complex|cytosol|positive regulation of sequestering of triglyceride	Lipid storage droplet-1 (Lsd-1) encodes a protein associated with lipid droplets. It protects lipid droplets from lipase mediated remobilization and facilitates lipolysis by serving as an anchoring point for lipases such as the one encoded by Hsl. It is involved in lipid storage amount regulation and energy homeostasis in concert with the product of Lsd-2. [Date last reviewed: 2019-03-14]	Lipid storage droplet-1	Lsd-1	Required for normal deposition of neutral lipids in the oocyte.	Belongs to the perilipin family.	-	-
FBgn0031702	822.447	0.481313	0.112375	4.28311	1.843e-05	0.00170808	fusl	protein_coding	GO:0016021|GO:0005886|GO:0043195|GO:0042734|GO:0007274|GO:0007270|GO:0070073|GO:0016020|GO:0016021|GO:0005886|GO:0043195|GO:0042734|GO:0007274|GO:0007270|GO:0070073|GO:0016020|GO:0016021|GO:0005886|GO:0043195|GO:0042734|GO:0007274|GO:0007270|GO:0070073|GO:0016020|GO:0016021|GO:0005886|GO:0043195|GO:0042734|GO:0007274|GO:0007270|GO:0070073|GO:0016020|GO:0016021|GO:0005886|GO:0043195|GO:0042734|GO:…	integral component of membrane|plasma membrane|terminal bouton|presynaptic membrane|neuromuscular synaptic transmission|neuron-neuron synaptic transmission|clustering of voltage-gated calcium channels|membrane|integral component of membrane|plasma membrane|terminal bouton|presynaptic membrane|neuromuscular synaptic transmission|neuron-neuron synaptic transmission|clustering of voltage-gated calci…	fuseless (fusl) encodes a protein involved in the clustering of voltage-gated calcium channels and the exocytosis of calcium-dependent synaptic vesicles. [Date last reviewed: 2019-09-19]	fuseless	fusl	-	-	-	-
FBgn0011559	34080.5	0.331719	0.0775629	4.27677	1.89627e-05	0.00174666	Acp36DE	protein_coding	GO:0005576|GO:0005615|GO:0032504|GO:0005179|GO:0045434|GO:0046693|GO:0046692|GO:0042628|GO:0007165|GO:0007610|GO:0005576|GO:0005615|GO:0032504|GO:0005179|GO:0045434|GO:0046693|GO:0046692|GO:0042628|GO:0007165|GO:0007610	extracellular region|extracellular space|multicellular organism reproduction|hormone activity|negative regulation of female receptivity, post-mating|sperm storage|sperm competition|mating plug formation|signal transduction|behavior|extracellular region|extracellular space|multicellular organism reproduction|hormone activity|negative regulation of female receptivity, post-mating|sperm storage|sper…	Accessory gland protein 36DE (Acp36DE) encodes a glycoprotein produced in male accessory glands and transferred to females during mating. It causes changes in female uterine conformation that assists with the movement of sperm into storage. It influences sperm competition outcomes including the likelihood of storage of a second male's sperm. [Date last reviewed: 2019-03-07]	Accessory gland protein 36DE	Acp36DE	Responsible for physiological and behavioral changes in mated female flies. Associates with sperm and localizes to specific regions of the female reproductive tract, including the sperm storage organs. It accelerates sperm accumulation into storage but does not mediate the entry of the first sperm into storage. Once sperm storage has initiated it seems to act as a guidance factor helping subseque…	-	-	-
FBgn0034010	60.1169	1.26396	0.295724	4.27412	1.91895e-05	0.00175678	CG8157	protein_coding			Insufficient genetic data for FlyBase to solicit a summary. [Date last reviewed: 2016-06-30]	-	CG8157	-	-	-	-
FBgn0031805	106.499	0.813515	0.190444	4.27167	1.94015e-05	0.00176542	Nepl4	protein_coding	GO:0006508|GO:0004222|GO:0008237|GO:0016787|GO:0005886|GO:0046872|GO:0008233	proteolysis|metalloendopeptidase activity|metallopeptidase activity|hydrolase activity|plasma membrane|metal ion binding|peptidase activity	-	Neprilysin-like 4	Nepl4	-	-	-	-
FBgn0265850	80.6877	0.991683	0.232243	4.27002	1.95457e-05	0.00176782	lncRNA:CR44639	ncRNA			-	long non-coding RNA:CR44639	lncRNA:CR44639	-	-	-	-
FBgn0260745	9689.5	-0.313688	0.0734902	-4.26843	1.96851e-05	0.00176977	mfas	protein_coding	GO:0050839|GO:0005615|GO:0032504|GO:0031012|GO:0007155|GO:0007409|GO:0030198|GO:0005515|GO:0050839|GO:0005615|GO:0032504|GO:0031012|GO:0007155|GO:0007409|GO:0030198|GO:0005515|GO:0050839|GO:0005615|GO:0032504|GO:0031012|GO:0007155|GO:0007409|GO:0030198|GO:0005515|GO:0050839|GO:0005615|GO:0032504|GO:0031012|GO:0007155|GO:0007409|GO:0030198|GO:0005515|GO:0050839|GO:0005615|GO:0032504|GO:0031012|GO:…	cell adhesion molecule binding|extracellular space|multicellular organism reproduction|extracellular matrix|cell adhesion|axonogenesis|extracellular matrix organization|protein binding|cell adhesion molecule binding|extracellular space|multicellular organism reproduction|extracellular matrix|cell adhesion|axonogenesis|extracellular matrix organization|protein binding|cell adhesion molecule bindin…	midline fasciclin (mfas) encodes a protein involved in axonogenesis and regulation of hemocyte proliferation. [Date last reviewed: 2019-09-26]	midline fasciclin	mfas	-	-	-	-
FBgn0262365	165.996	0.648864	0.152162	4.2643	2.00527e-05	0.00179209	CG43063	protein_coding			Insufficient genetic data for FlyBase to solicit a summary. [Date last reviewed: 2016-06-30]	-	CG43063	-	-	-	-
FBgn0031925	1339.47	0.506906	0.119106	4.25593	2.08184e-05	0.00184385	Cyp4d21	protein_coding	GO:0005737|GO:0055114|GO:0005506|GO:0005789|GO:0020037|GO:0016705|GO:0004497|GO:0007618|GO:0016020|GO:0016021|GO:0046872|GO:0005783|GO:0016491|GO:0031090|GO:0043231	cytoplasm|oxidation-reduction process|iron ion binding|endoplasmic reticulum membrane|heme binding|oxidoreductase activity, acting on paired donors, with incorporation or reduction of molecular oxygen|monooxygenase activity|mating|membrane|integral component of membrane|metal ion binding|endoplasmic reticulum|oxidoreductase activity|organelle membrane|intracellular membrane-bounded organelle	-	Cyp4d21	Cyp4d21	May be involved in the metabolism of insect hormones and in the breakdown of synthetic insecticides.	Belongs to the cytochrome P450 family.	-	-
GFP	9.32273	4.74253	1.1145	4.25529	2.08775e-05	0.00184385
FBgn0014869	6104.63	-0.354563	0.0834598	-4.24831	2.15392e-05	0.00189116	Pglym78	protein_coding	GO:0007520|GO:0003824|GO:0030018|GO:0007525|GO:0006096|GO:0031430|GO:0004619|GO:0004082|GO:0016868|GO:0016853|GO:0007520|GO:0003824|GO:0030018|GO:0007525|GO:0006096|GO:0031430|GO:0004619|GO:0004082|GO:0016868|GO:0016853|GO:0007520|GO:0003824|GO:0030018|GO:0007525|GO:0006096|GO:0031430|GO:0004619|GO:0004082|GO:0016868|GO:0016853	myoblast fusion|catalytic activity|Z disc|somatic muscle development|glycolytic process|M band|phosphoglycerate mutase activity|bisphosphoglycerate mutase activity|intramolecular transferase activity, phosphotransferases|isomerase activity|myoblast fusion|catalytic activity|Z disc|somatic muscle development|glycolytic process|M band|phosphoglycerate mutase activity|bisphosphoglycerate mutase acti…	Phosphoglyceromutase 78 (Pglym78) encodes an enzyme involved in myoblast fusion and somatic muscle development. [Date last reviewed: 2019-09-12]	Phosphoglyceromutase 78	Pglym78	-	-	-	-
FBgn0039107	128.813	-0.770825	0.181783	-4.24035	2.23172e-05	0.00194809	CG10300	protein_coding	GO:1902936	phosphatidylinositol bisphosphate binding	Insufficient genetic data for FlyBase to solicit a summary. [Date last reviewed: 2016-06-30]	-	CG10300	-	-	-	-
FBgn0264864	164.103	0.637889	0.150502	4.23842	2.251e-05	0.00195356	lncRNA:CR44055	ncRNA			-	long non-coding RNA:CR44055	lncRNA:CR44055	-	-	-	-
FBgn0039471	974.547	0.684345	0.1618	4.22957	2.34136e-05	0.0020203	CG6295	protein_coding	GO:0005615|GO:0016042|GO:0016298|GO:0052689|GO:0006629|GO:0008970|GO:0005575|GO:0016787|GO:0005576|GO:0004806	extracellular space|lipid catabolic process|lipase activity|carboxylic ester hydrolase activity|lipid metabolic process|phospholipase A1 activity|cellular_component|hydrolase activity|extracellular region|triglyceride lipase activity	Insufficient genetic data for FlyBase to solicit a summary. [Date last reviewed: 2016-06-30]	-	CG6295	-	-	-	-
FBgn0085452	195.423	0.624982	0.147865	4.2267	2.37141e-05	0.00203453	CG34423	protein_coding	GO:0005739|GO:0032780|GO:0042030|GO:0051117|GO:0006783|GO:0005739|GO:0032780|GO:0042030|GO:0051117|GO:0006783	mitochondrion|negative regulation of ATPase activity|ATPase inhibitor activity|ATPase binding|heme biosynthetic process|mitochondrion|negative regulation of ATPase activity|ATPase inhibitor activity|ATPase binding|heme biosynthetic process	Insufficient genetic data for FlyBase to solicit a summary. [Date last reviewed: 2016-06-30]	-	CG34423	-	-	-	-
FBgn0265529	8.96215	-5.64926	1.33701	-4.22531	2.38616e-05	0.00203486	lncRNA:CR44379	ncRNA			-	long non-coding RNA:CR44379	lncRNA:CR44379	-	-	-	-
FBgn0261989	815.979	1.11383	0.263683	4.22411	2.3989e-05	0.00203486	CG42807	protein_coding			Insufficient genetic data for FlyBase to solicit a summary. [Date last reviewed: 2016-06-30]	-	CG42807	-	-	-	-
FBgn0029947	1972.36	-0.908366	0.215787	-4.20955	2.55883e-05	0.00215833	CG1999	protein_coding			Insufficient genetic data for FlyBase to solicit a summary. [Date last reviewed: 2016-06-30]	-	CG1999	-	-	-	-
FBgn0039192	379.843	-0.468333	0.111524	-4.19938	2.67648e-05	0.00224495	CG17784	protein_coding			Insufficient genetic data for FlyBase to solicit a summary. [Date last reviewed: 2016-10-13]	-	CG17784	-	-	-	-
FBgn0020508	495.121	0.908454	0.216545	4.19522	2.7261e-05	0.00227387	Ag5r2	protein_coding	GO:0005576|GO:0005615|GO:0032504|GO:0003674|GO:0008150	extracellular region|extracellular space|multicellular organism reproduction|molecular_function|biological_process	Insufficient genetic data for FlyBase to solicit a summary. [Date last reviewed: 2016-06-30]	Antigen 5-related 2	Ag5r2	-	-	-	-
FBgn0065059	1024.1	0.499319	0.119558	4.17638	2.96188e-05	0.00245689	snoRNA:660	snoRNA			-	snoRNA:660	snoRNA:660	-	-	-	-
FBgn0261568	202.254	0.568134	0.136325	4.16749	3.07974e-05	0.00254062	CG42682	protein_coding	GO:0003674|GO:0008150|GO:0005575	molecular_function|biological_process|cellular_component	Insufficient genetic data for FlyBase to solicit a summary. [Date last reviewed: 2016-10-13]	-	CG42682	-	-	-	-
FBgn0034296	1490.59	-0.690426	0.16694	-4.13577	3.53773e-05	0.00290248	CG10912	protein_coding	GO:0009631	cold acclimation	Insufficient genetic data for FlyBase to solicit a summary. [Date last reviewed: 2016-06-30]	-	CG10912	-	-	-	-
FBgn0265900	26.0888	1.51305	0.367272	4.1197	3.79372e-05	0.0030956	lncRNA:CR44689	ncRNA			-	long non-coding RNA:CR44689	lncRNA:CR44689	-	-	-	-
FBgn0039598	1961.53	0.352693	0.0856973	4.11557	3.8622e-05	0.00313444	aqrs	protein_coding	GO:0006508|GO:0004252|GO:0005615|GO:0032504|GO:0045434|GO:0046693	proteolysis|serine-type endopeptidase activity|extracellular space|multicellular organism reproduction|negative regulation of female receptivity, post-mating|sperm storage	aquarius (aqrs) encodes a predicted serine protease produced by the male accessory glands and transferred to females during mating. It is required for the binding of the product of SP to sperm and for the transfer of the products of lectin-46Ca and lectin-46Cb to females during mating. [Date last reviewed: 2019-03-07]	aquarius	aqrs	-	-	-	-
FBgn0042710	2264.57	-0.373771	0.0908694	-4.11327	3.90088e-05	0.00314881	Hex-t2	protein_coding	GO:0005524|GO:0005829|GO:0006013|GO:0005975|GO:0006000|GO:0006096|GO:0006006|GO:0005536|GO:0008865|GO:0016773|GO:0001678|GO:0004340|GO:0019158|GO:0004396|GO:0000166|GO:0016301|GO:0016740|GO:0016310|GO:0005739|GO:0005575|GO:0046835|GO:0051156|GO:0019318	ATP binding|cytosol|mannose metabolic process|carbohydrate metabolic process|fructose metabolic process|glycolytic process|glucose metabolic process|glucose binding|fructokinase activity|phosphotransferase activity, alcohol group as acceptor|cellular glucose homeostasis|glucokinase activity|mannokinase activity|hexokinase activity|nucleotide binding|kinase activity|transferase activity|phosphoryl…	Insufficient genetic data for FlyBase to solicit a summary. [Date last reviewed: 2016-06-30]	Hex-t2	Hex-t2	Catalyzes the phosphorylation of various hexoses to hexose 6-phosphate.	Belongs to the hexokinase family.	-	Carbohydrate metabolism; hexose metabolism. Carbohydrate degradation; glycolysis; D-glyceraldehyde 3-phosphate and glycerone phosphate from D-glucose: step 1/4.
FBgn0034521	835.674	0.41787	0.101644	4.11111	3.93753e-05	0.0031614	Mgat1	protein_coding	GO:0008340|GO:0016319|GO:0005794|GO:0008344|GO:0006487|GO:0018279|GO:0035010|GO:0008375|GO:0005797|GO:0006486|GO:0035284|GO:0003827|GO:0016020|GO:0016021|GO:0016740|GO:0046872|GO:0016757	determination of adult lifespan|mushroom body development|Golgi apparatus|adult locomotory behavior|protein N-linked glycosylation|protein N-linked glycosylation via asparagine|encapsulation of foreign target|acetylglucosaminyltransferase activity|Golgi medial cisterna|protein glycosylation|brain segmentation|alpha-1,3-mannosylglycoprotein 2-beta-N-acetylglucosaminyltransferase activity|membrane|…	Mannosyl (Œ±-1,3-)-glycoprotein Œ≤-1,2-N-acetylglucosaminyltransferase (Mgat1) encodes an enzyme involved in the synthesis of paucimannose N-glycans. It is required in the CNS, with involvement in locomotion, brain development and lifespan. [Date last reviewed: 2019-09-26]	Mannosyl (alpha-1,3-)-glycoprotein beta-1,2-N-acetylglucosaminyltransferase	Mgat1	-	-	-	-
FBgn0038697	2034.23	-0.307064	0.0749636	-4.09618	4.20026e-05	0.0033544	CG3581	protein_coding	GO:0003674|GO:0005575	molecular_function|cellular_component	-	-	CG3581	-	-	-	-
FBgn0030349	1275.9	0.532136	0.130003	4.09326	4.25348e-05	0.00337893	CG10353	protein_coding	GO:0016021|GO:0046983|GO:0005229|GO:0006821|GO:0070062|GO:0016020|GO:0005886|GO:0005254|GO:0055085|GO:1902476|GO:0016021|GO:0046983|GO:0005229|GO:0006821|GO:0070062|GO:0016020|GO:0005886|GO:0005254|GO:0055085|GO:1902476|GO:0016021|GO:0046983|GO:0005229|GO:0006821|GO:0070062|GO:0016020|GO:0005886|GO:0005254|GO:0055085|GO:1902476|GO:0016021|GO:0046983|GO:0005229|GO:0006821|GO:0070062|GO:0016020|GO:…	integral component of membrane|protein dimerization activity|intracellular calcium activated chloride channel activity|chloride transport|extracellular exosome|membrane|plasma membrane|chloride channel activity|transmembrane transport|chloride transmembrane transport|integral component of membrane|protein dimerization activity|intracellular calcium activated chloride channel activity|chloride tra…	Insufficient genetic data for FlyBase to solicit a summary. [Date last reviewed: 2016-06-30]	-	CG10353	-	-	-	-
FBgn0263763	286.498	0.765571	0.187388	4.08549	4.39832e-05	0.0034756	CG43680	protein_coding	GO:0003674|GO:0008150|GO:0005575	molecular_function|biological_process|cellular_component	Insufficient genetic data for FlyBase to solicit a summary. [Date last reviewed: 2016-10-13]	-	CG43680	-	-	-	-
FBgn0036440	386.003	-0.993606	0.243441	-4.08152	4.47431e-05	0.00351713	CG17177	protein_coding			Insufficient genetic data for FlyBase to solicit a summary. [Date last reviewed: 2017-07-13]	-	CG17177	-	-	-	-
FBgn0250815	29842.1	-0.323811	0.0794617	-4.07506	4.6003e-05	0.00359734	Jon65Aiv	protein_coding	GO:0006508|GO:0004252|GO:0016787|GO:0008233|GO:0008236	proteolysis|serine-type endopeptidase activity|hydrolase activity|peptidase activity|serine-type peptidase activity	Insufficient genetic data for FlyBase to solicit a summary. [Date last reviewed: 2016-06-30]	Jonah 65Aiv	Jon65Aiv	-	-	-	-
FBgn0033863	2879.15	-0.347444	0.0853712	-4.06981	4.70514e-05	0.00365486	CG13337	protein_coding	GO:0003674|GO:0008150|GO:0005575|GO:0003674|GO:0008150|GO:0005575	molecular_function|biological_process|cellular_component|molecular_function|biological_process|cellular_component	Insufficient genetic data for FlyBase to solicit a summary. [Date last reviewed: 2016-10-13]	-	CG13337	-	-	-	-
FBgn0267607	11.6918	3.45037	0.847976	4.06895	4.72254e-05	0.00365486	lncRNA:CR45945	ncRNA			-	long non-coding RNA:CR45945	lncRNA:CR45945	-	-	-	-
FBgn0260812	371.217	0.468099	0.11513	4.06582	4.78645e-05	0.00368532	inaF-D	protein_coding	GO:0016021|GO:0016020|GO:0042391|GO:0016058|GO:0005246|GO:0016247	integral component of membrane|membrane|regulation of membrane potential|maintenance of membrane potential in photoreceptor cell by rhodopsin mediated signaling|calcium channel regulator activity|channel regulator activity	inaF-D (inaF-D) contains four small ORFs named inaF-A, B, C, and D, each of which is spliced to the same down-stream exon. Mutations in inaF-D greatly suppress the expression of the photoreceptor channel protein encoded by trp. [Date last reviewed: 2019-02-28]	inaF-D	inaF-D	-	-	-	-
FBgn0053301	438.224	-0.665322	0.163863	-4.06025	4.90211e-05	0.00375512	CG33301	protein_coding	GO:0003674|GO:0008150|GO:0005575|GO:0003674|GO:0008150|GO:0005575	molecular_function|biological_process|cellular_component|molecular_function|biological_process|cellular_component	Insufficient genetic data for FlyBase to solicit a summary. [Date last reviewed: 2016-06-30]	-	CG33301	-	-	-	-
FBgn0040528	287.895	0.644713	0.159311	4.04689	5.19018e-05	0.00394343	CG15864	protein_coding	GO:0005783|GO:0055114|GO:0005506|GO:0016705|GO:0018401|GO:0016702|GO:0004656|GO:0031418|GO:0016491|GO:0046872|GO:0005788|GO:0051213|GO:0019511|GO:0005515	endoplasmic reticulum|oxidation-reduction process|iron ion binding|oxidoreductase activity, acting on paired donors, with incorporation or reduction of molecular oxygen|peptidyl-proline hydroxylation to 4-hydroxy-L-proline|oxidoreductase activity, acting on single donors with incorporation of molecular oxygen, incorporation of two atoms of oxygen|procollagen-proline 4-dioxygenase activity|L-ascor…	Insufficient genetic data for FlyBase to solicit a summary. [Date last reviewed: 2016-06-30]	-	CG15864	-	-	-	-
FBgn0259194	23.8122	1.5017	0.371117	4.04643	5.20047e-05	0.00394343	Ir94e	protein_coding	GO:0016021|GO:0015276|GO:0009593|GO:0016020|GO:0034220	integral component of membrane|ligand-gated ion channel activity|detection of chemical stimulus|membrane|ion transmembrane transport	Insufficient genetic data for FlyBase to solicit a summary. [Date last reviewed: 2016-06-30]	Ionotropic receptor 94e	Ir94e	-	-	-	-
FBgn0085261	300.214	-0.526607	0.130235	-4.04352	5.26541e-05	0.00397261	CG34232	protein_coding	GO:0003674|GO:0008150|GO:0005575|GO:0016020|GO:0016021|GO:0003674|GO:0008150|GO:0005575|GO:0003674|GO:0008150|GO:0005575	molecular_function|biological_process|cellular_component|membrane|integral component of membrane|molecular_function|biological_process|cellular_component|molecular_function|biological_process|cellular_component	Insufficient genetic data for FlyBase to solicit a summary. [Date last reviewed: 2016-10-13]	-	CG34232	-	-	-	-
FBgn0259918	437.508	0.431966	0.10689	4.0412	5.31777e-05	0.00399205	inaF-B	protein_coding	GO:0016021|GO:0016028|GO:0009416|GO:0016027|GO:0005246|GO:0016057|GO:0033583|GO:0016020|GO:0005515	integral component of membrane|rhabdomere|response to light stimulus|inaD signaling complex|calcium channel regulator activity|regulation of membrane potential in photoreceptor cell|rhabdomere membrane|membrane|protein binding	inaF-B (inaF-B) encodes a calcium channel regulator involved in response to light and the regulation of photoreceptor cell membrane potential. [Date last reviewed: 2019-09-12]	inaF-B	inaF-B	-	-	-	-
FBgn0262814	227.933	0.642974	0.159483	4.03162	5.53937e-05	0.00413772	CG43185	protein_coding	GO:0003674|GO:0008150|GO:0005575|GO:0016020|GO:0016021|GO:0003674|GO:0008150|GO:0005575	molecular_function|biological_process|cellular_component|membrane|integral component of membrane|molecular_function|biological_process|cellular_component	Insufficient genetic data for FlyBase to solicit a summary. [Date last reviewed: 2016-10-13]	-	CG43185	-	-	-	-
FBgn0036995	350.388	-0.544391	0.135155	-4.02791	5.62754e-05	0.00418276	atk	protein_coding	GO:0005737|GO:0031012|GO:0060271|GO:0007423|GO:0040011|GO:0050896|GO:0005576|GO:0005515|GO:0005737|GO:0031012|GO:0060271|GO:0007423|GO:0040011|GO:0050896|GO:0005576|GO:0005515|GO:0005737|GO:0031012|GO:0060271|GO:0007423|GO:0040011|GO:0050896|GO:0005576|GO:0005515	cytoplasm|extracellular matrix|cilium assembly|sensory organ development|locomotion|response to stimulus|extracellular region|protein binding|cytoplasm|extracellular matrix|cilium assembly|sensory organ development|locomotion|response to stimulus|extracellular region|protein binding|cytoplasm|extracellular matrix|cilium assembly|sensory organ development|locomotion|response to stimulus|extracellu…	artichoke (atk) encodes a leucine-rich-repeat extracellular matrix protein secreted by accessory cells in ciliated sensory organs. It surrounds the tip of the cilium, and contributes to its assembly. Its roles include cilium integrity, chemosensation and proprioception. [Date last reviewed: 2019-03-07]	artichoke	atk	Required for normal morphology and function of ciliated sensory organs.	-	-	-
FBgn0266163	13.2491	2.20332	0.54765	4.02323	5.74045e-05	0.00424567	CG44869	protein_coding	GO:0003674|GO:0008150|GO:0005575	molecular_function|biological_process|cellular_component	Insufficient genetic data for FlyBase to solicit a summary. [Date last reviewed: 2016-10-13]	-	CG44869	-	-	-	-
FBgn0002564	169.123	1.17959	0.29354	4.0185	5.85702e-05	0.00431065	Lsp1gamma	protein_coding	GO:0045735|GO:0005616|GO:0005576|GO:0005615	nutrient reservoir activity|larval serum protein complex|extracellular region|extracellular space	-	Larval serum protein 1 gamma	Lsp1gamma	Larval storage protein (LSP) which may serve as a store of amino acids for synthesis of adult proteins.	Belongs to the hemocyanin family.	Heterohexamer, composed of three subunits, alpha, beta and gamma.	-
FBgn0033787	1169.17	-0.467741	0.116485	-4.01547	5.93272e-05	0.00434506	CG13321	protein_coding			Insufficient genetic data for FlyBase to solicit a summary. [Date last reviewed: 2016-06-30]	-	CG13321	-	-	-	-
FBgn0266052	26.0886	1.47386	0.368428	4.00041	6.32317e-05	0.00460855	lncRNA:CR44817	ncRNA			-	long non-coding RNA:CR44817	lncRNA:CR44817	-	-	-	-
FBgn0032913	1432.02	0.413768	0.103574	3.99491	6.47189e-05	0.00469415	CG9259	protein_coding			Insufficient genetic data for FlyBase to solicit a summary. [Date last reviewed: 2016-06-30]	-	CG9259	-	-	-	-
FBgn0038056	119.656	0.917275	0.229717	3.99306	6.52273e-05	0.00470828	CG5961	protein_coding	GO:0005737|GO:0016567|GO:0019005|GO:0031146|GO:0005515|GO:0005737|GO:0016567|GO:0019005|GO:0031146|GO:0005515|GO:0005737|GO:0016567|GO:0019005|GO:0031146|GO:0005515	cytoplasm|protein ubiquitination|SCF ubiquitin ligase complex|SCF-dependent proteasomal ubiquitin-dependent protein catabolic process|protein binding|cytoplasm|protein ubiquitination|SCF ubiquitin ligase complex|SCF-dependent proteasomal ubiquitin-dependent protein catabolic process|protein binding|cytoplasm|protein ubiquitination|SCF ubiquitin ligase complex|SCF-dependent proteasomal ubiquitin-d…	Insufficient genetic data for FlyBase to solicit a summary. [Date last reviewed: 2016-06-30]	-	CG5961	-	-	-	-
FBgn0033679	416.044	0.485619	0.121839	3.98574	6.72689e-05	0.00483242	CG8888	protein_coding	GO:0016021|GO:0005886|GO:0004303|GO:0047035|GO:0016020|GO:0016491|GO:0055114	integral component of membrane|plasma membrane|estradiol 17-beta-dehydrogenase activity|testosterone dehydrogenase (NAD+) activity|membrane|oxidoreductase activity|oxidation-reduction process	-	-	CG8888	-	-	-	-
FBgn0000044	19015.6	0.496993	0.124792	3.98259	6.81695e-05	0.0048536	Act57B	protein_coding	GO:0005737|GO:0005524|GO:0005886|GO:0005856|GO:0007507|GO:0000281|GO:0015629|GO:0005200|GO:0050807|GO:0005884|GO:0007010|GO:0098529|GO:0000166	cytoplasm|ATP binding|plasma membrane|cytoskeleton|heart development|mitotic cytokinesis|actin cytoskeleton|structural constituent of cytoskeleton|regulation of synapse organization|actin filament|cytoskeleton organization|neuromuscular junction development, skeletal muscle fiber|nucleotide binding	Actin 57B (Act57B) is one of several actin genes in the Drosophila genome, and one of the few that encode myofibrillar actin. This essential gene is a transcriptional target of Mef2 and Cf2 and is expressed in all embryonic muscles and a subset of adult muscle. [Date last reviewed: 2018-09-06]	Actin 57B	Act57B	Actins are highly conserved proteins that are involved in various types of cell motility and are ubiquitously expressed in all eukaryotic cells. Multiple isoforms are involved in various cellular functions such as cytoskeleton structure, cell mobility, chromosome movement and muscle contraction.	Belongs to the actin family.	-	-
FBgn0051921	2638.71	-0.378089	0.0949389	-3.98244	6.82103e-05	0.0048536	CG31921	protein_coding	GO:0003674|GO:0008150|GO:0005575	molecular_function|biological_process|cellular_component	Insufficient genetic data for FlyBase to solicit a summary. [Date last reviewed: 2016-10-13]	-	CG31921	-	-	-	-
FBgn0038717	171.77	0.982214	0.246734	3.98086	6.86652e-05	0.00486292	CG17751	protein_coding	GO:0016021|GO:0055085|GO:0022857|GO:0016020	integral component of membrane|transmembrane transport|transmembrane transporter activity|membrane	Insufficient genetic data for FlyBase to solicit a summary. [Date last reviewed: 2016-06-30]	-	CG17751	-	-	-	-
FBgn0039040	730.386	-0.691345	0.17407	-3.97165	7.13775e-05	0.00501257	CG13833	protein_coding	GO:0016021|GO:0005811|GO:0016020|GO:0016491|GO:0055114|GO:0016616	integral component of membrane|lipid droplet|membrane|oxidoreductase activity|oxidation-reduction process|oxidoreductase activity, acting on the CH-OH group of donors, NAD or NADP as acceptor	-	-	CG13833	-	-	-	-
FBgn0039184	1205.61	0.411769	0.103693	3.97104	7.15581e-05	0.00501257	CG6432	protein_coding	GO:0003824|GO:0006633|GO:0031955|GO:0016874|GO:0003996|GO:0004467|GO:0102391|GO:0001676|GO:0003824|GO:0006633|GO:0031955|GO:0016874|GO:0003996|GO:0004467|GO:0102391|GO:0001676	catalytic activity|fatty acid biosynthetic process|short-chain fatty acid-CoA ligase activity|ligase activity|acyl-CoA ligase activity|long-chain fatty acid-CoA ligase activity|decanoate-CoA ligase activity|long-chain fatty acid metabolic process|catalytic activity|fatty acid biosynthetic process|short-chain fatty acid-CoA ligase activity|ligase activity|acyl-CoA ligase activity|long-chain fatty …	Insufficient genetic data for FlyBase to solicit a summary. [Date last reviewed: 2016-06-30]	-	CG6432	-	-	-	-
FBgn0267004	9.79603	-3.18113	0.80123	-3.97031	7.17799e-05	0.00501257	lncRNA:CR45448	ncRNA			-	long non-coding RNA:CR45448	lncRNA:CR45448	-	-	-	-
FBgn0270926	594.261	0.76986	0.19435	3.96121	7.4572e-05	0.00518344	AsnS	protein_coding	GO:0005524|GO:0005829|GO:0004066|GO:0006529|GO:0006541|GO:0000166|GO:0016874|GO:0008652|GO:0070981	ATP binding|cytosol|asparagine synthase (glutamine-hydrolyzing) activity|asparagine biosynthetic process|glutamine metabolic process|nucleotide binding|ligase activity|cellular amino acid biosynthetic process|L-asparagine biosynthetic process	-	Asparagine synthetase	AsnS	-	-	-	-
FBgn0040299	427.33	-0.463975	0.117211	-3.95845	7.54384e-05	0.00521835	Myo28B1	protein_coding	GO:0005524|GO:0005856|GO:0003779|GO:0051015|GO:0003774|GO:0042623|GO:0030048|GO:0016459|GO:0030898|GO:0000146|GO:0000166|GO:0030054|GO:0005737|GO:0007015|GO:0031982|GO:0015629|GO:0007423|GO:0030050|GO:0005902|GO:0005515|GO:0005524|GO:0005856|GO:0003779|GO:0051015|GO:0003774|GO:0042623|GO:0030048|GO:0016459|GO:0030898|GO:0000146|GO:0000166|GO:0030054|GO:0005737|GO:0007015|GO:0031982|GO:0015629|GO:…	ATP binding|cytoskeleton|actin binding|actin filament binding|motor activity|ATPase activity, coupled|actin filament-based movement|myosin complex|actin-dependent ATPase activity|microfilament motor activity|nucleotide binding|cell junction|cytoplasm|actin filament organization|vesicle|actin cytoskeleton|sensory organ development|vesicle transport along actin filament|microvillus|protein binding|…	Myosin 28B1 (Myo28B1) encodes a high duty ratio motor protein belonging to the MyTH4-FERM subgroup of actin-based molecular motors. [Date last reviewed: 2019-03-21]	Myosin 28B1	Myo28B1	-	-	-	-
FBgn0034472	3609.66	-0.416537	0.105255	-3.9574	7.57692e-05	0.00521835	CG8517	protein_coding	GO:0005739|GO:0045454|GO:0006662|GO:0015036|GO:0015035|GO:0055114	mitochondrion|cell redox homeostasis|glycerol ether metabolic process|disulfide oxidoreductase activity|protein disulfide oxidoreductase activity|oxidation-reduction process	Insufficient genetic data for FlyBase to solicit a summary. [Date last reviewed: 2016-06-30]	-	CG8517	-	-	-	-
FBgn0038266	831.137	-0.536202	0.136058	-3.94099	8.11461e-05	0.00556314	CG3610	protein_coding	GO:0003674|GO:0008150|GO:0005575	molecular_function|biological_process|cellular_component	Insufficient genetic data for FlyBase to solicit a summary. [Date last reviewed: 2016-06-30]	-	CG3610	-	-	-	-
FBgn0031208	497.732	-0.445191	0.113175	-3.93364	8.36695e-05	0.00571007	CR11023	pseudogene			Insufficient genetic data for FlyBase to solicit a summary. [Date last reviewed: 2016-06-30]	-	CR11023	-	-	-	-
FBgn0004431	111.288	1.10394	0.28074	3.93227	8.41487e-05	0.00571678	LysX	protein_coding	GO:0005615|GO:0050829|GO:0019835|GO:0008152|GO:0003796|GO:0016787|GO:0003824|GO:0016798|GO:0042742	extracellular space|defense response to Gram-negative bacterium|cytolysis|metabolic process|lysozyme activity|hydrolase activity|catalytic activity|hydrolase activity, acting on glycosyl bonds|defense response to bacterium	Insufficient genetic data for FlyBase to solicit a summary. [Date last reviewed: 2016-06-30]	Lysozyme X	LysX	Unlikely to play an active role in the humoral immune defense. May have a function in the digestion of bacteria in the food. May be involved in the clearance of bacteria from the larval gut before metamorphosis.	Belongs to the glycosyl hydrolase 22 family.	-	-
FBgn0052463	177.219	-0.590376	0.15022	-3.93008	8.49185e-05	0.00572865	Tengl2	protein_coding	GO:0005634|GO:0016021|GO:0046872|GO:0003676|GO:0005739|GO:0005743|GO:0016787|GO:0006309|GO:0004521|GO:0004519|GO:0000014|GO:0004529|GO:0000737|GO:0016020|GO:0090502|GO:0090305|GO:0004518	nucleus|integral component of membrane|metal ion binding|nucleic acid binding|mitochondrion|mitochondrial inner membrane|hydrolase activity|apoptotic DNA fragmentation|endoribonuclease activity|endonuclease activity|single-stranded DNA endodeoxyribonuclease activity|exodeoxyribonuclease activity|DNA catabolic process, endonucleolytic|membrane|RNA phosphodiester bond hydrolysis, endonucleolytic|nu…	Insufficient genetic data for FlyBase to solicit a summary. [Date last reviewed: 2016-06-30]	Testis EndoG-Like 2	Tengl2	-	-	-	-
FBgn0051935	478.693	-0.465994	0.118586	-3.9296	8.50866e-05	0.00572865	CG31935	protein_coding	GO:0005737|GO:0017137|GO:0043087|GO:0034389|GO:0032483|GO:0005096|GO:0048172|GO:0098794|GO:0032991|GO:1903373|GO:0071782|GO:1903233|GO:0097051|GO:0061646|GO:0060079|GO:0043547	cytoplasm|Rab GTPase binding|regulation of GTPase activity|lipid droplet organization|regulation of Rab protein signal transduction|GTPase activator activity|regulation of short-term neuronal synaptic plasticity|postsynapse|protein-containing complex|positive regulation of endoplasmic reticulum tubular network organization|endoplasmic reticulum tubular network|regulation of calcium ion-dependent …	-	-	CG31935	Probable catalytic subunit of a GTPase activating protein that has specificity for Rab3 subfamily. Rab3 proteins are involved in regulated exocytosis of neurotransmitters and hormones. Specifically converts active Rab3-GTP to the inactive form Rab3-GDP (By similarity).	Belongs to the Rab3-GAP catalytic subunit family.	The Rab3 GTPase-activating complex is a heterodimer composed of CG31935 and rab3-GAP/CG7061.	-
FBgn0020907	1486.35	-0.339267	0.0864064	-3.92641	8.62215e-05	0.00577915	Scp2	protein_coding	GO:0005783|GO:0005509|GO:0003924|GO:0017156	endoplasmic reticulum|calcium ion binding|GTPase activity|calcium-ion regulated exocytosis	Insufficient genetic data for FlyBase to solicit a summary. [Date last reviewed: 2016-06-30]	Sarcoplasmic calcium-binding protein 2	Scp2	-	-	-	-
FBgn0001229	68.3035	0.965293	0.246782	3.91151	9.17195e-05	0.00612034	Hsp67Bc	protein_coding	GO:0010506|GO:0051082|GO:0061077|GO:0010998|GO:0009408|GO:1903061|GO:0005515|GO:0030018	regulation of autophagy|unfolded protein binding|chaperone-mediated protein folding|regulation of translational initiation by eIF2 alpha phosphorylation|response to heat|positive regulation of protein lipidation|protein binding|Z disc	Heat shock gene 67Bc (Hsp67Bc) encodes a small heat shock protein (hsp) that binds to the product encoded by stv to regulate protein lipidation. The product of Hsp67Bc also induces the phosphorylation of eIF2Œ± protein and stimulates autophagy, thereby facilitating the clearance of misfolded proteins. Hsp67Bc expression can be regulated by the product of pcm. [Date last reviewed: 2018-09-13]	Heat shock gene 67Bc	Hsp67Bc	-	Belongs to the small heat shock protein (HSP20) family.	-	-
FBgn0036428	3939.28	-0.37786	0.0966598	-3.90917	9.26131e-05	0.00615262	Gbs-70E	protein_coding	GO:0008157|GO:0048149|GO:0070873|GO:0005977|GO:2001069|GO:0005975|GO:0000164|GO:0005515|GO:0005979|GO:0008157|GO:0048149|GO:0070873|GO:0005977|GO:2001069|GO:0005975|GO:0000164|GO:0005515|GO:0005979|GO:0008157|GO:0048149|GO:0070873|GO:0005977|GO:2001069|GO:0005975|GO:0000164|GO:0005515|GO:0005979	protein phosphatase 1 binding|behavioral response to ethanol|regulation of glycogen metabolic process|glycogen metabolic process|glycogen binding|carbohydrate metabolic process|protein phosphatase type 1 complex|protein binding|regulation of glycogen biosynthetic process|protein phosphatase 1 binding|behavioral response to ethanol|regulation of glycogen metabolic process|glycogen metabolic proces…	Glycogen binding subunit 70E (Gbs-70E) is one of the glycogen binding subunits of protein phosphatase 1 (Pp1) that interacts with all of the known Pp1 catalytic subunits (encoded by Pp1-87B, flw, Pp1Œ±-96A, and Pp1-13C). The product of Gbs-70E is involved in the regulation of glycogen metabolism, and plays a role in the egg development. [Date last reviewed: 2019-03-21]	Glycogen binding subunit 70E	Gbs-70E	-	-	-	-
FBgn0040733	615.761	-0.76057	0.194793	-3.9045	9.44207e-05	0.00624507	CG15068	protein_coding	GO:0005576|GO:0002376|GO:0045087	extracellular region|immune system process|innate immune response	Insufficient genetic data for FlyBase to solicit a summary. [Date last reviewed: 2016-06-30]	Bomanin S6	BomS6	-	-	-	-
FBgn0265445	192.601	0.611593	0.156922	3.89744	9.72157e-05	0.00640174	lncRNA:CR44345	ncRNA			-	long non-coding RNA:CR44345	lncRNA:CR44345	-	-	-	-
FBgn0265185	879.67	-0.548938	0.140898	-3.89599	9.77968e-05	0.00641188	CG44250	protein_coding	GO:0003674|GO:0008150|GO:0005575|GO:0003674|GO:0008150|GO:0005575	molecular_function|biological_process|cellular_component|molecular_function|biological_process|cellular_component	Insufficient genetic data for FlyBase to solicit a summary. [Date last reviewed: 2016-06-30]	-	CG44250	-	-	-	-
FBgn0264566	13.1434	2.19062	0.56315	3.88995	0.000100265	0.00653143	CG43938	protein_coding	GO:0003674|GO:0008150|GO:0005575	molecular_function|biological_process|cellular_component	Insufficient genetic data for FlyBase to solicit a summary. [Date last reviewed: 2016-10-13]	-	CG43938	-	-	-	-
FBgn0029539	687.017	-0.414639	0.106607	-3.88941	0.00010049	0.00653143	CG11663	protein_coding			Insufficient genetic data for FlyBase to solicit a summary. [Date last reviewed: 2016-06-30]	-	CG11663	-	-	-	-
FBgn0028986	6117.7	0.407582	0.105204	3.87421	0.000106971	0.00692267	Spn38F	protein_coding	GO:0005615|GO:0032504|GO:0050829|GO:0004867|GO:0045861|GO:0010951|GO:0030414|GO:0010466|GO:0005615|GO:0032504|GO:0050829|GO:0004867|GO:0045861|GO:0010951|GO:0030414|GO:0010466	extracellular space|multicellular organism reproduction|defense response to Gram-negative bacterium|serine-type endopeptidase inhibitor activity|negative regulation of proteolysis|negative regulation of endopeptidase activity|peptidase inhibitor activity|negative regulation of peptidase activity|extracellular space|multicellular organism reproduction|defense response to Gram-negative bacterium|se…	Serpin 38F (Spn38F) encodes a predicted serine endopeptidase inhibitor. It is expressed in the male accessory glands and transferred to females during mating. Spn38F ectopic expression in females provides anti-microbial protection. [Date last reviewed: 2019-03-14]	Serpin 38F	Spn38F	-	-	-	-
FBgn0267471	90.6661	-0.80099	0.207241	-3.86501	0.000111085	0.00713019	lncRNA:CR45821	ncRNA			-	long non-coding RNA:CR45821	lncRNA:CR45821	-	-	-	-
FBgn0003358	4077.56	-0.860772	0.222714	-3.86492	0.000111127	0.00713019	Jon99Ci	protein_coding	GO:0004175|GO:0006508|GO:0004252|GO:0016787|GO:0008233|GO:0008236	endopeptidase activity|proteolysis|serine-type endopeptidase activity|hydrolase activity|peptidase activity|serine-type peptidase activity	Insufficient genetic data for FlyBase to solicit a summary. [Date last reviewed: 2016-06-30]	Jonah 99Ci	Jon99Ci	Its major function may be to aid in digestion.	Belongs to the peptidase S1 family.	-	-
FBgn0039135	371.037	-0.536285	0.138813	-3.86337	0.000111835	0.00714504	CG13603	protein_coding	GO:0016021|GO:0016020	integral component of membrane|membrane	Insufficient genetic data for FlyBase to solicit a summary. [Date last reviewed: 2016-06-30]	-	CG13603	-	-	-	-
FBgn0263130	34.6247	-1.22327	0.316799	-3.86134	0.000112766	0.00717399	lncRNA:CR43372	ncRNA			-	long non-coding RNA:CR43372	lncRNA:CR43372	-	-	-	-
FBgn0030270	74.9467	-0.895966	0.232304	-3.85687	0.000114849	0.00727573	CG15199	protein_coding	GO:0005615|GO:0051607|GO:0005576|GO:0005615|GO:0051607|GO:0005576	extracellular space|defense response to virus|extracellular region|extracellular space|defense response to virus|extracellular region	Insufficient genetic data for FlyBase to solicit a summary. [Date last reviewed: 2016-06-30]	-	CG15199	-	-	-	-
FBgn0039472	590.883	0.897759	0.232943	3.85398	0.000116212	0.00732813	CG17192	protein_coding	GO:0005615|GO:0016042|GO:0016298|GO:0052689|GO:0006629|GO:0008970|GO:0005575|GO:0016787|GO:0005576|GO:0004806	extracellular space|lipid catabolic process|lipase activity|carboxylic ester hydrolase activity|lipid metabolic process|phospholipase A1 activity|cellular_component|hydrolase activity|extracellular region|triglyceride lipase activity	Insufficient genetic data for FlyBase to solicit a summary. [Date last reviewed: 2016-06-30]	-	CG17192	-	-	-	-
FBgn0004003	436.567	0.634904	0.164779	3.85306	0.000116653	0.00732813	wbl	protein_coding	GO:0005783|GO:0012505|GO:0005788|GO:0007275|GO:0042803|GO:0009792|GO:0040014|GO:0009950|GO:0007313|GO:0009306|GO:0034975|GO:0005515|GO:0005783|GO:0012505|GO:0005788|GO:0007275|GO:0042803|GO:0009792|GO:0040014|GO:0009950|GO:0007313|GO:0009306|GO:0034975|GO:0005515	endoplasmic reticulum|endomembrane system|endoplasmic reticulum lumen|multicellular organism development|protein homodimerization activity|embryo development ending in birth or egg hatching|regulation of multicellular organism growth|dorsal/ventral axis specification|maternal specification of dorsal/ventral axis, oocyte, soma encoded|protein secretion|protein folding in endoplasmic reticulum|prot…	windbeutel (wbl) encodes a Toll signaling pathway member protein residing in the endoplasmic reticulum. It is required for the transport of the product of pip to the Golgi in ovarian follicle cells. [Date last reviewed: 2019-03-21]	windbeutel	wbl	Probable chaperone protein involved in dorsoventral axis patterning in early embryos. Probably acts by folding and targeting pipe (pip) into the Golgi.	-	Homodimer. Interacts directly with pip.	-
FBgn0002855	8238.93	0.340696	0.0884806	3.85052	0.00011787	0.00737372	Acp26Aa	protein_coding	GO:0005576|GO:0005615|GO:0032504|GO:0042802|GO:0018991|GO:0048042|GO:0030728|GO:0007618|GO:0045297|GO:0046692|GO:0007610|GO:0060279|GO:2000130	extracellular region|extracellular space|multicellular organism reproduction|identical protein binding|oviposition|regulation of post-mating oviposition|ovulation|mating|post-mating behavior|sperm competition|behavior|positive regulation of ovulation|positive regulation of octopamine signaling pathway	Accessory gland protein 26Aa (Acp26Aa) encodes a protein synthesized in male accessory glands. It is transferred during mating to females where it induces an increase in ovulation by relaxing the oviduct via activation of octopaminergic signaling. [Date last reviewed: 2019-03-07]	Accessory gland protein 26Aa	Acp26Aa	This protein is transferred from male to female's hemolymph during mating, affecting egglaying and behavior after mating.	-	-	-
FBgn0035934	82.3786	-0.998115	0.259526	-3.84591	0.000120107	0.00748249	TrpA1	protein_coding	GO:0016021|GO:0055085|GO:0016020|GO:0005216|GO:0006811|GO:0034220|GO:0050896|GO:0005515|GO:0016021|GO:0055085|GO:0016020|GO:0005216|GO:0006811|GO:0034220|GO:0050896|GO:0005515|GO:0016021|GO:0055085|GO:0016020|GO:0005216|GO:0006811|GO:0034220|GO:0050896|GO:0009408|GO:0005515|GO:0016021|GO:0055085|GO:0016020|GO:0005216|GO:0006811|GO:0034220|GO:0050896|GO:0005515|GO:0016021|GO:0005886|GO:0046957|GO:…	integral component of membrane|transmembrane transport|membrane|ion channel activity|ion transport|ion transmembrane transport|response to stimulus|protein binding|integral component of membrane|transmembrane transport|membrane|ion channel activity|ion transport|ion transmembrane transport|response to stimulus|protein binding|integral component of membrane|transmembrane transport|membrane|ion cha…	Transient receptor potential cation channel A1 (TrpA1) encodes a cation channel activated by warming and by reactive chemicals. Its roles include the control of thermotaxis at innocuous temperatures, as well as thermal and chemical nociception in response to noxious heat and chemical exposure. [Date last reviewed: 2019-03-14]	Transient receptor potential cation channel A1	TrpA1	Essential for thermotaxis by sensing environmental temperature. Receptor-activated non-selective cation channel involved in detection of sensations such as temperature. Involved in heat nociception by being activated by warm temperature of about 24-29 degrees Celsius.	Belongs to the transient receptor (TC 1.A.4) family.	Homotetramer.	-
FBgn0263328	3.73404	5.33391	1.38777	3.8435	0.000121292	0.00751176	lncRNA:CR43409	ncRNA			-	long non-coding RNA:CR43409	lncRNA:CR43409	-	-	-	-
FBgn0261055	2937.19	0.422003	0.109817	3.8428	0.000121641	0.00751176	Sfp26Ad	protein_coding	GO:0005615|GO:0032504|GO:0003674|GO:0005615|GO:0032504|GO:0003674	extracellular space|multicellular organism reproduction|molecular_function|extracellular space|multicellular organism reproduction|molecular_function	-	Seminal fluid protein 26Ad	Sfp26Ad	-	-	-	-
FBgn0035356	898.604	-0.684623	0.178198	-3.84192	0.000122077	0.00751176	CG16986	protein_coding	GO:0047617|GO:0051289|GO:0016787|GO:0047617|GO:0051289|GO:0016787	acyl-CoA hydrolase activity|protein homotetramerization|hydrolase activity|acyl-CoA hydrolase activity|protein homotetramerization|hydrolase activity	-	-	CG16986	-	-	-	-
FBgn0050325	234.176	-0.498048	0.129847	-3.83566	0.000125225	0.007674	CG30325	protein_coding	GO:0003674|GO:0008150|GO:0005575	molecular_function|biological_process|cellular_component	Insufficient genetic data for FlyBase to solicit a summary. [Date last reviewed: 2016-06-30]	-	CG30325	-	-	-	-
FBgn0266152	27.1459	-1.34483	0.351112	-3.8302	0.000128039	0.00781456	lncRNA:CR44858	ncRNA			-	long non-coding RNA:CR44858	lncRNA:CR44858	-	-	-	-
FBgn0261287	3508.34	-0.309662	0.0808758	-3.82886	0.000128739	0.00782543	ymp	protein_coding	GO:0016021|GO:0071011|GO:0071013|GO:0000398|GO:0016020|GO:0016021|GO:0071011|GO:0071013|GO:0000398|GO:0016020|GO:0016021|GO:0071011|GO:0071013|GO:0000398|GO:0016020|GO:0016021|GO:0071011|GO:0071013|GO:0000398|GO:0016020	integral component of membrane|precatalytic spliceosome|catalytic step 2 spliceosome|mRNA splicing, via spliceosome|membrane|integral component of membrane|precatalytic spliceosome|catalytic step 2 spliceosome|mRNA splicing, via spliceosome|membrane|integral component of membrane|precatalytic spliceosome|catalytic step 2 spliceosome|mRNA splicing, via spliceosome|membrane|integral component of me…	-	yellow-emperor	ymp	-	-	-	-
FBgn0263774	319.543	-0.533361	0.139455	-3.8246	0.000130982	0.00792971	CG43691	protein_coding	GO:0003674|GO:0008150|GO:0005575|GO:0003674|GO:0008150|GO:0005575	molecular_function|biological_process|cellular_component|molecular_function|biological_process|cellular_component	Insufficient genetic data for FlyBase to solicit a summary. [Date last reviewed: 2016-06-30]	-	CG43691	-	-	-	-
FBgn0033848	722.372	-0.411988	0.107872	-3.81924	0.000133863	0.00807154	CG13330	protein_coding	GO:0003674|GO:0008150|GO:0005575	molecular_function|biological_process|cellular_component	Insufficient genetic data for FlyBase to solicit a summary. [Date last reviewed: 2016-10-13]	-	CG13330	-	-	-	-
FBgn0265592	31.5317	1.23581	0.323683	3.81796	0.00013456	0.00808112	lncRNA:CR44419	ncRNA			-	long non-coding RNA:CR44419	lncRNA:CR44419	-	-	-	-
FBgn0267755	19.4925	-1.57269	0.412049	-3.81675	0.000135223	0.00808857	lncRNA:CR46086	ncRNA			-	long non-coding RNA:CR46086	lncRNA:CR46086	-	-	-	-
FBgn0052282	1268.84	-0.686498	0.179922	-3.81552	0.000135894	0.00809647	Drsl4	protein_coding	GO:0005576|GO:0050832|GO:0006952|GO:0003674	extracellular region|defense response to fungus|defense response|molecular_function	Drosomycin-like 4 (Drsl4) encodes a secreted peptide with homology to the antifungal peptide encoded by Drs. [Date last reviewed: 2019-03-07]	Drosomycin-like 4	Drsl4	-	-	-	-
FBgn0040628	159.005	0.630021	0.165586	3.80481	0.000141915	0.00840383	CAH16	protein_coding	GO:0008270|GO:0004089|GO:0005886|GO:0046872|GO:0016829|GO:0006730|GO:0016836|GO:0008270|GO:0004089|GO:0046872|GO:0016829|GO:0008270|GO:0004089|GO:0046872|GO:0016829	zinc ion binding|carbonate dehydratase activity|plasma membrane|metal ion binding|lyase activity|one-carbon metabolic process|hydro-lyase activity|zinc ion binding|carbonate dehydratase activity|metal ion binding|lyase activity|zinc ion binding|carbonate dehydratase activity|metal ion binding|lyase activity	-	Carbonic anhydrase 16	CAH16	-	-	-	-
FBgn0036023	769.759	-0.957802	0.251765	-3.80436	0.000142172	0.00840383	CG18179	protein_coding	GO:0006508|GO:0004252|GO:0016787|GO:0008233|GO:0008236	proteolysis|serine-type endopeptidase activity|hydrolase activity|peptidase activity|serine-type peptidase activity	Insufficient genetic data for FlyBase to solicit a summary. [Date last reviewed: 2016-06-30]	-	CG18179	-	-	-	-
FBgn0034997	1006.13	-0.460958	0.121383	-3.79756	0.000146127	0.00860372	CG3376	protein_coding	GO:0016021|GO:0046872|GO:0016787|GO:0016798|GO:0004767|GO:0006685|GO:0016020|GO:0005576|GO:0008152|GO:0016021|GO:0046872|GO:0005615|GO:0016787|GO:0005764|GO:0016798|GO:0004767|GO:0006685|GO:0008081|GO:0046513|GO:0061750|GO:0016020|GO:0005576|GO:0008152|GO:0016021|GO:0046872|GO:0016787|GO:0016798|GO:0004767|GO:0006685|GO:0016020|GO:0005576|GO:0008152|GO:0016021|GO:0046872|GO:0016787|GO:0016798|GO:…	integral component of membrane|metal ion binding|hydrolase activity|hydrolase activity, acting on glycosyl bonds|sphingomyelin phosphodiesterase activity|sphingomyelin catabolic process|membrane|extracellular region|metabolic process|integral component of membrane|metal ion binding|extracellular space|hydrolase activity|lysosome|hydrolase activity, acting on glycosyl bonds|sphingomyelin phosphodi…	-	-	CG3376	-	-	-	-
FBgn0039620	1490.77	0.300626	0.0792682	3.79252	0.000149125	0.00874594	wat	protein_coding	GO:0016021|GO:0005737|GO:0055114|GO:0045177|GO:0016324|GO:0005777|GO:0006629|GO:0035002|GO:0080019|GO:0010025|GO:0035336|GO:0102965|GO:0035149|GO:0050062|GO:0016020|GO:0005886|GO:0016491|GO:0043231	integral component of membrane|cytoplasm|oxidation-reduction process|apical part of cell|apical plasma membrane|peroxisome|lipid metabolic process|liquid clearance, open tracheal system|fatty-acyl-CoA reductase (alcohol-forming) activity|wax biosynthetic process|long-chain fatty-acyl-CoA metabolic process|alcohol-forming fatty acyl-CoA reductase activity|lumen formation, open tracheal system|long…	waterproof (wat) encodes a fatty acyl-CoA reductase that reduces very long chain fatty acids of 24 and 26 carbon atoms. It is essential for gas filling of the embryonic tracheal system and for the formation of the outermost tracheal cuticle sublayer, the envelope. [Date last reviewed: 2019-03-21]	waterproof	wat	Catalyzes the reduction of saturated fatty acyl-CoA to fatty alcohols. The preferred substrates are C24:0 and C26:0. Necessary for the final stages of tracheal maturation, to facilitate the transition from water-filled to gas-filled tubes. May help to maintain the integrity of the outer hydrophobic envelope of the trachea.	Belongs to the fatty acyl-CoA reductase family.	-	-
FBgn0262687	1007.07	0.560445	0.148189	3.78196	0.000155601	0.00906776	lncRNA:CR43157	ncRNA			-	long non-coding RNA:CR43157	lncRNA:CR43157	-	-	-	-
FBgn0033289	209.656	0.657969	0.173992	3.78161	0.00015582	0.00906776	CG2121	protein_coding	GO:0016021|GO:0005886|GO:0006937|GO:0015459|GO:0043266|GO:0055120|GO:0003009|GO:0016020|GO:0006936|GO:0016021|GO:0005886|GO:0006937|GO:0015459|GO:0043266|GO:0055120|GO:0003009|GO:0016020|GO:0006936	integral component of membrane|plasma membrane|regulation of muscle contraction|potassium channel regulator activity|regulation of potassium ion transport|striated muscle dense body|skeletal muscle contraction|membrane|muscle contraction|integral component of membrane|plasma membrane|regulation of muscle contraction|potassium channel regulator activity|regulation of potassium ion transport|striat…	Insufficient genetic data for FlyBase to solicit a summary. [Date last reviewed: 2016-06-30]	-	CG2121	-	-	-	-
FBgn0040601	54.6994	1.04137	0.275589	3.7787	0.000157649	0.00913877	CG13643	protein_coding	GO:0005576|GO:0008061|GO:0006030|GO:0005576|GO:0008061|GO:0006030|GO:0005576|GO:0008061|GO:0006030|GO:0005576|GO:0008061|GO:0006030	extracellular region|chitin binding|chitin metabolic process|extracellular region|chitin binding|chitin metabolic process|extracellular region|chitin binding|chitin metabolic process|extracellular region|chitin binding|chitin metabolic process	-	-	CG13643	-	-	-	-
FBgn0010422	499.46	0.444185	0.11758	3.77773	0.000158264	0.00913914	TfIIS	protein_coding	GO:0003677|GO:0005634|GO:0003676|GO:0008270|GO:0006351|GO:0006355|GO:0003746|GO:0006368|GO:0046872|GO:0006414|GO:0003677|GO:0005634|GO:0003676|GO:0008270|GO:0006351|GO:0006355|GO:0003746|GO:0006368|GO:0046872|GO:0006414	DNA binding|nucleus|nucleic acid binding|zinc ion binding|transcription, DNA-templated|regulation of transcription, DNA-templated|translation elongation factor activity|transcription elongation from RNA polymerase II promoter|metal ion binding|translational elongation|DNA binding|nucleus|nucleic acid binding|zinc ion binding|transcription, DNA-templated|regulation of transcription, DNA-templated|…	-	RNA polymerase II elongation factor	TfIIS	Necessary for efficient RNA polymerase II transcription elongation past template-encoded arresting sites. The arresting sites in DNA have the property of trapping a certain fraction of elongating RNA polymerases that pass through, resulting in locked ternary complexes. Cleavage of the nascent transcript by S-II allows the resumption of elongation from the new 3'-terminus.	Belongs to the TFS-II family.	-	-
FBgn0033659	335.611	-0.507186	0.134599	-3.76811	0.000164485	0.00946199	Damm	protein_coding	GO:0005737|GO:0006508|GO:0006915|GO:0012501|GO:0004197|GO:0097153|GO:0008234|GO:0016787|GO:0097194|GO:0097200|GO:0005737|GO:0006508|GO:0006915|GO:0012501|GO:0004197|GO:0097153|GO:0008234|GO:0016787|GO:0097194|GO:0097200	cytoplasm|proteolysis|apoptotic process|programmed cell death|cysteine-type endopeptidase activity|cysteine-type endopeptidase activity involved in apoptotic process|cysteine-type peptidase activity|hydrolase activity|execution phase of apoptosis|cysteine-type endopeptidase activity involved in execution phase of apoptosis|cytoplasm|proteolysis|apoptotic process|programmed cell death|cysteine-typ…	Death associated molecule related to Mch2 caspase (Damm) encodes one of the seven members of the caspase family of cysteine proteases. Damm overexpression induces cell death. [Date last reviewed: 2019-03-07]	Death associated molecule related to Mch2 caspase	Damm	-	-	-	-
FBgn0036796	644.435	0.601029	0.159595	3.76596	0.000165911	0.00950761	CG18231	protein_coding	GO:0005783|GO:0055114|GO:0005506|GO:0016705|GO:0018401|GO:0016702|GO:0004656|GO:0031418|GO:0016491|GO:0051213|GO:0019511|GO:0005515	endoplasmic reticulum|oxidation-reduction process|iron ion binding|oxidoreductase activity, acting on paired donors, with incorporation or reduction of molecular oxygen|peptidyl-proline hydroxylation to 4-hydroxy-L-proline|oxidoreductase activity, acting on single donors with incorporation of molecular oxygen, incorporation of two atoms of oxygen|procollagen-proline 4-dioxygenase activity|L-ascor…	-	-	CG18231	-	-	-	-
FBgn0043533	528.827	0.573728	0.152769	3.75552	0.000172985	0.00987528	Obp56f	protein_coding	GO:0005576|GO:0005615|GO:0032504|GO:0007606|GO:0007608|GO:0005549	extracellular region|extracellular space|multicellular organism reproduction|sensory perception of chemical stimulus|sensory perception of smell|odorant binding	Insufficient genetic data for FlyBase to solicit a summary. [Date last reviewed: 2016-06-30]	Odorant-binding protein 56f	Obp56f	-	-	-	-
FBgn0032360	4894.51	-0.303195	0.0808753	-3.74892	0.000177597	0.0101002	CG14926	protein_coding			Insufficient genetic data for FlyBase to solicit a summary. [Date last reviewed: 2016-06-30]	-	CG14926	-	-	-	-
FBgn0264884	35.6029	1.2632	0.338584	3.73083	0.000190848	0.0108128	lncRNA:CR44075	ncRNA			-	long non-coding RNA:CR44075	lncRNA:CR44075	-	-	-	-
FBgn0067903	355.319	0.513506	0.138347	3.71173	0.000205851	0.0115755	IM18	protein_coding	GO:0005576|GO:0045087|GO:0009617|GO:0006952|GO:0098542|GO:0002376|GO:0005576|GO:0045087|GO:0009617|GO:0006952|GO:0098542|GO:0002376	extracellular region|innate immune response|response to bacterium|defense response|defense response to other organism|immune system process|extracellular region|innate immune response|response to bacterium|defense response|defense response to other organism|immune system process	-	Immune induced molecule 18	IM18	-	-	-	-
FBgn0260455	355.319	0.513506	0.138347	3.71173	0.000205851	0.0115755	CG10332	protein_coding			Insufficient genetic data for FlyBase to solicit a summary. [Date last reviewed: 2016-06-30]	-	CG10332	-	-	-	-
FBgn0263217	36.4448	1.11289	0.300346	3.70535	0.000211097	0.0118262	lncRNA:CR43387	ncRNA			-	long non-coding RNA:CR43387	lncRNA:CR43387	-	-	-	-
tdTomato	4.24921	5.50683	1.48667	3.70415	0.000212102	0.0118383
FBgn0032144	5523.48	-0.355216	0.0961305	-3.69515	0.000219758	0.0121921	CG17633	protein_coding	GO:0006508|GO:0008270|GO:0005615|GO:0004181|GO:0004180|GO:0016787|GO:0046872|GO:0008233|GO:0008237|GO:0005576	proteolysis|zinc ion binding|extracellular space|metallocarboxypeptidase activity|carboxypeptidase activity|hydrolase activity|metal ion binding|peptidase activity|metallopeptidase activity|extracellular region	Insufficient genetic data for FlyBase to solicit a summary. [Date last reviewed: 2016-06-30]	-	CG17633	-	Belongs to the peptidase M14 family.	-	-
FBgn0266763	27.9049	1.29408	0.350244	3.69479	0.000220066	0.0121921	lncRNA:CR45228	ncRNA			-	long non-coding RNA:CR45228	lncRNA:CR45228	-	-	-	-
FBgn0003145	370.96	0.424114	0.114836	3.69322	0.000221436	0.0122229	prd	protein_coding	GO:0003677|GO:0006355|GO:0043565|GO:0003677|GO:0005634|GO:0000981|GO:0000977|GO:0045944|GO:0006355|GO:0043565|GO:0006366|GO:0007366|GO:0007275	DNA binding|regulation of transcription, DNA-templated|sequence-specific DNA binding|DNA binding|nucleus|DNA-binding transcription factor activity, RNA polymerase II-specific|RNA polymerase II regulatory region sequence-specific DNA binding|positive regulation of transcription by RNA polymerase II|regulation of transcription, DNA-templated|sequence-specific DNA binding|transcription by RNA polyme…	paired (prd) is a paired-rule gene that encodes a transcription factor with two independent DNA binding domains, a paired domain and a homeodomain. Its roles include embryonic segmentation, accessory gland development and male fertility. [Date last reviewed: 2019-03-14]	paired	prd	Pair-rule protein expressed in a segmentally repeating pattern to define the polarity of embryonic segments. Capable of sequence-specific DNA-binding.	Belongs to the paired homeobox family.	-	-
FBgn0051872	19851.2	0.351417	0.095326	3.68647	0.000227383	0.0124712	CG31872	protein_coding	GO:0005615|GO:0032504|GO:0016298|GO:0006629|GO:0044255|GO:0016787|GO:0005615|GO:0032504|GO:0016298|GO:0006629|GO:0044255|GO:0016787	extracellular space|multicellular organism reproduction|lipase activity|lipid metabolic process|cellular lipid metabolic process|hydrolase activity|extracellular space|multicellular organism reproduction|lipase activity|lipid metabolic process|cellular lipid metabolic process|hydrolase activity	Insufficient genetic data for FlyBase to solicit a summary. [Date last reviewed: 2016-06-30]	-	CG31872	-	-	-	-
FBgn0265047	36.2526	-1.13524	0.307966	-3.68624	0.000227596	0.0124712	FDY	protein_coding	GO:0003723|GO:0003723	RNA binding|RNA binding	flagrante delicto Y (FDY) is a gene inserted in the Y chromosome originated from a duplication of vig2. [Date last reviewed: 2019-03-07]	flagrante delicto Y	FDY	-	-	-	-
FBgn0024997	369.786	-0.421856	0.114514	-3.68389	0.000229703	0.012541	CG2681	protein_coding	GO:0005634|GO:0008270|GO:0004842|GO:0043161|GO:0061630|GO:0007275|GO:0006511|GO:0031624|GO:0005575|GO:0016740|GO:0046872|GO:0005737|GO:0016567|GO:0042025|GO:0005515	nucleus|zinc ion binding|ubiquitin-protein transferase activity|proteasome-mediated ubiquitin-dependent protein catabolic process|ubiquitin protein ligase activity|multicellular organism development|ubiquitin-dependent protein catabolic process|ubiquitin conjugating enzyme binding|cellular_component|transferase activity|metal ion binding|cytoplasm|protein ubiquitination|host cell nucleus|protein …	Insufficient genetic data for FlyBase to solicit a summary. [Date last reviewed: 2016-06-30]	-	CG2681	-	-	-	-
FBgn0011653	21.5108	-1.66383	0.452194	-3.67945	0.000233741	0.0126905	mas	protein_coding	GO:0006508|GO:0004252|GO:0005737|GO:0005886|GO:0043025|GO:0030424|GO:0006508|GO:0004252|GO:0007417|GO:0005615|GO:0007422|GO:0016203|GO:0010976|GO:0061564|GO:0106030|GO:0005576|GO:0007275|GO:0042995	proteolysis|serine-type endopeptidase activity|cytoplasm|plasma membrane|neuronal cell body|axon|proteolysis|serine-type endopeptidase activity|central nervous system development|extracellular space|peripheral nervous system development|muscle attachment|positive regulation of neuron projection development|axon development|neuron projection fasciculation|extracellular region|multicellular organis…	-	masquerade	mas	In embryogenesis, has a role in somatic muscle attachment and in the development of axonal pathways probably by stabilizing cell-matrix adhesion and/or by acting as a competitive antagonist of serine proteases.	Belongs to the peptidase S1 family. CLIP subfamily.	-	-
FBgn0050016	137.609	0.850722	0.231288	3.6782	0.000234885	0.0126905	CG30016	protein_coding	GO:0006144|GO:0033971|GO:0016787	purine nucleobase metabolic process|hydroxyisourate hydrolase activity|hydrolase activity	-	-	CG30016	-	-	-	-
FBgn0040959	509.789	0.429619	0.116805	3.6781	0.000234977	0.0126905	Peritrophin-15a	protein_coding	GO:0005615|GO:0008061|GO:0006030|GO:0062129|GO:0016490	extracellular space|chitin binding|chitin metabolic process|chitin-based extracellular matrix|structural constituent of peritrophic membrane	Insufficient genetic data for FlyBase to solicit a summary. [Date last reviewed: 2016-06-30]	Peritrophin-15a	Peritrophin-15a	-	-	-	-
FBgn0034687	393.456	-0.46471	0.126413	-3.67611	0.000236813	0.0127438	CG11475	protein_coding	GO:0019899|GO:0051998|GO:0008757|GO:0006479|GO:2001020|GO:0005575|GO:0016787|GO:0046872|GO:0016311|GO:0008168|GO:0032259|GO:0016791	enzyme binding|protein carboxyl O-methyltransferase activity|S-adenosylmethionine-dependent methyltransferase activity|protein methylation|regulation of response to DNA damage stimulus|cellular_component|hydrolase activity|metal ion binding|dephosphorylation|methyltransferase activity|methylation|phosphatase activity	Insufficient genetic data for FlyBase to solicit a summary. [Date last reviewed: 2016-06-30]	-	CG11475	-	-	-	-
FBgn0051413	411.388	0.417443	0.113701	3.67141	0.000241212	0.0128017	Qsox4	protein_coding	GO:0055114|GO:0005615|GO:0032504|GO:0045454|GO:0030173|GO:0003756|GO:0016971|GO:0016972|GO:0016491|GO:0016853|GO:0006457	oxidation-reduction process|extracellular space|multicellular organism reproduction|cell redox homeostasis|integral component of Golgi membrane|protein disulfide isomerase activity|flavin-linked sulfhydryl oxidase activity|thiol oxidase activity|oxidoreductase activity|isomerase activity|protein folding	Insufficient genetic data for FlyBase to solicit a summary. [Date last reviewed: 2016-06-30]	Quiescin sulfhydryl oxidase 4	Qsox4	-	-	-	-
FBgn0031337	386.024	-0.500382	0.136306	-3.67103	0.000241578	0.0128017	CG14346	protein_coding			Insufficient genetic data for FlyBase to solicit a summary. [Date last reviewed: 2016-06-30]	-	CG14346	-	-	-	-
FBgn0034758	319.601	-0.482555	0.131471	-3.67042	0.000242153	0.0128017	CG13510	protein_coding	GO:0009631|GO:0016020|GO:0003674|GO:0005575|GO:0046872|GO:0005765|GO:0010008|GO:0009631|GO:0016020|GO:0003674|GO:0005575|GO:0046872|GO:0005765|GO:0010008|GO:0009631|GO:0016020|GO:0003674|GO:0005575|GO:0046872|GO:0005765|GO:0010008	cold acclimation|membrane|molecular_function|cellular_component|metal ion binding|lysosomal membrane|endosome membrane|cold acclimation|membrane|molecular_function|cellular_component|metal ion binding|lysosomal membrane|endosome membrane|cold acclimation|membrane|molecular_function|cellular_component|metal ion binding|lysosomal membrane|endosome membrane	Insufficient genetic data for FlyBase to solicit a summary. [Date last reviewed: 2016-06-30]	-	CG13510	-	-	-	-
FBgn0034759	319.601	-0.482555	0.131471	-3.67042	0.000242153	0.0128017	CG13511	protein_coding	GO:0016021|GO:0016020|GO:0003674|GO:0008150|GO:0005575|GO:0046872|GO:0005765|GO:0010008|GO:0016021|GO:0016020|GO:0003674|GO:0008150|GO:0005575|GO:0046872|GO:0005765|GO:0010008	integral component of membrane|membrane|molecular_function|biological_process|cellular_component|metal ion binding|lysosomal membrane|endosome membrane|integral component of membrane|membrane|molecular_function|biological_process|cellular_component|metal ion binding|lysosomal membrane|endosome membrane	Insufficient genetic data for FlyBase to solicit a summary. [Date last reviewed: 2017-07-13]	-	CG13511	-	-	-	-
FBgn0260767	319.601	-0.482555	0.131471	-3.67042	0.000242153	0.0128017	CG42565	protein_coding	GO:0016020|GO:0003674|GO:0008150|GO:0005575|GO:0046872|GO:0005765|GO:0010008|GO:0016020|GO:0003674|GO:0008150|GO:0005575|GO:0046872|GO:0005765|GO:0010008	membrane|molecular_function|biological_process|cellular_component|metal ion binding|lysosomal membrane|endosome membrane|membrane|molecular_function|biological_process|cellular_component|metal ion binding|lysosomal membrane|endosome membrane	Insufficient genetic data for FlyBase to solicit a summary. [Date last reviewed: 2016-06-30]	-	CG42565	-	-	-	-
FBgn0051281	2685.82	-0.364401	0.0993113	-3.66928	0.000243237	0.0128139	Tpl94D	protein_coding	GO:0005634|GO:0007283|GO:0000785|GO:0035092|GO:0035093|GO:0005634|GO:0007283|GO:0000785|GO:0035092|GO:0035093	nucleus|spermatogenesis|chromatin|sperm chromatin condensation|spermatogenesis, exchange of chromosomal proteins|nucleus|spermatogenesis|chromatin|sperm chromatin condensation|spermatogenesis, exchange of chromosomal proteins	Transition protein-like 94D (Tpl94D) encodes a HMG-box domain protein that is expressed during chromatin reorganization in spermatids. [Date last reviewed: 2019-03-14]	Transition protein-like 94D	Tpl94D	-	-	-	-
FBgn0265723	9.26363	-2.6269	0.716192	-3.66787	0.000244576	0.0128394	lncRNA:CR44530	ncRNA			-	long non-coding RNA:CR44530	lncRNA:CR44530	-	-	-	-
FBgn0031520	384.763	-0.420582	0.114804	-3.66348	0.000248808	0.0129758	CG8837	protein_coding	GO:0016021|GO:0005887|GO:0055085|GO:0005351|GO:0022857|GO:0016020|GO:0016021|GO:0005887|GO:0055085|GO:0005351|GO:0022857|GO:0016020	integral component of membrane|integral component of plasma membrane|transmembrane transport|carbohydrate:proton symporter activity|transmembrane transporter activity|membrane|integral component of membrane|integral component of plasma membrane|transmembrane transport|carbohydrate:proton symporter activity|transmembrane transporter activity|membrane	Insufficient genetic data for FlyBase to solicit a summary. [Date last reviewed: 2016-06-30]	-	CG8837	-	-	-	-
FBgn0267935	36.193	-1.12554	0.30724	-3.66339	0.000248903	0.0129758	lncRNA:CR46215	ncRNA			-	long non-coding RNA:CR46215	lncRNA:CR46215	-	-	-	-
FBgn0040341	143.927	0.58819	0.160644	3.66145	0.000250791	0.013029	CG11664	protein_coding	GO:0006508|GO:0004252|GO:0005615|GO:0032504|GO:0016787	proteolysis|serine-type endopeptidase activity|extracellular space|multicellular organism reproduction|hydrolase activity	CG11664 encodes a protein with homology to serine-type endopeptidases, but is not predicted to have catalytic activity due to mutations in its active site. It is produced by the male accessory glands. [Date last reviewed: 2019-03-07]	-	CG11664	-	-	-	-
FBgn0265698	3.61672	-5.31101	1.4519	-3.65797	0.00025422	0.0131616	lncRNA:CR44505	ncRNA			-	long non-coding RNA:CR44505	lncRNA:CR44505	-	-	-	-
FBgn0085425	705.564	-0.545049	0.149423	-3.64769	0.00026461	0.0136524	CG34396	protein_coding	GO:0016021|GO:0005887|GO:0071805|GO:0022841|GO:0030322|GO:0005267|GO:0016020|GO:0006811|GO:0016021|GO:0005887|GO:0071805|GO:0022841|GO:0030322|GO:0005267|GO:0016020|GO:0006811	integral component of membrane|integral component of plasma membrane|potassium ion transmembrane transport|potassium ion leak channel activity|stabilization of membrane potential|potassium channel activity|membrane|ion transport|integral component of membrane|integral component of plasma membrane|potassium ion transmembrane transport|potassium ion leak channel activity|stabilization of membrane p…	Insufficient genetic data for FlyBase to solicit a summary. [Date last reviewed: 2016-06-30]	-	CG34396	-	-	-	-
FBgn0264264	31.4006	-1.21413	0.333436	-3.64127	0.000271297	0.0139495	lncRNA:CR43764	ncRNA			-	long non-coding RNA:CR43764	lncRNA:CR43764	-	-	-	-
FBgn0043865	313.285	0.526038	0.14469	3.63563	0.0002773	0.0142095	SA-2	protein_coding	GO:0005634|GO:0003682|GO:0000785|GO:0007062|GO:0008278|GO:0005730|GO:0000794	nucleus|chromatin binding|chromatin|sister chromatid cohesion|cohesin complex|nucleolus|condensed nuclear chromosome	Stromalin-2 (SA-2) encodes a paralog of the cohesin protein encoded by SA. It functions in the male meiosis-specific homolog pairing pathway. It is required to maintain homolog pairing and to ensure bi-orientation of homologs during meiosis I. [Date last reviewed: 2019-03-14]	Stromalin-2	SA-2	-	-	-	-
FBgn0038796	294.583	-0.507701	0.139741	-3.63315	0.000279985	0.0142969	eIF3g2	protein_coding	GO:0005737|GO:0003729|GO:0003743|GO:0006413|GO:0003676|GO:0016282|GO:0033290|GO:0001732|GO:0005852|GO:0003723|GO:0006412|GO:0002183	cytoplasm|mRNA binding|translation initiation factor activity|translational initiation|nucleic acid binding|eukaryotic 43S preinitiation complex|eukaryotic 48S preinitiation complex|formation of cytoplasmic translation initiation complex|eukaryotic translation initiation factor 3 complex|RNA binding|translation|cytoplasmic translational initiation	Insufficient genetic data for FlyBase to solicit a summary. [Date last reviewed: 2016-06-30]	eukaryotic translation initiation factor 3 subunit g2	eIF3g2	RNA-binding component of the eukaryotic translation initiation factor 3 (eIF-3) complex, which is involved in protein synthesis of a specialized repertoire of mRNAs and, together with other initiation factors, stimulates binding of mRNA and methionyl-tRNAi to the 40S ribosome. The eIF-3 complex specifically targets and initiates translation of a subset of mRNAs involved in cell proliferation. Thi…	Belongs to the eIF-3 subunit G family.	Component of the eukaryotic translation initiation factor 3 (eIF-3) complex. The eIF-3 complex interacts with pix.	-
FBgn0004429	512.265	0.576781	0.158792	3.6323	0.000280909	0.0142969	LysP	protein_coding	GO:0005615|GO:0050829|GO:0019835|GO:0008152|GO:0003796|GO:0016787|GO:0003824|GO:0016798|GO:0042742	extracellular space|defense response to Gram-negative bacterium|cytolysis|metabolic process|lysozyme activity|hydrolase activity|catalytic activity|hydrolase activity, acting on glycosyl bonds|defense response to bacterium	Insufficient genetic data for FlyBase to solicit a summary. [Date last reviewed: 2016-06-30]	Lysozyme P	LysP	Unlikely to play an active role in the humoral immune defense. May have a function in the digestion of bacteria in the food.	Belongs to the glycosyl hydrolase 22 family.	-	-
FBgn0259966	1075.13	0.414788	0.114314	3.6285	0.000285076	0.0144577	Sfp51E	protein_coding	GO:0005615|GO:0032504|GO:0003674	extracellular space|multicellular organism reproduction|molecular_function	Insufficient genetic data for FlyBase to solicit a summary. [Date last reviewed: 2016-06-30]	Seminal fluid protein 51E	Sfp51E	-	-	-	-
FBgn0027843	1774.31	-0.412057	0.113587	-3.62767	0.000285995	0.0144577	CAH2	protein_coding	GO:0008270|GO:0004089|GO:0031233|GO:0006730|GO:0005886|GO:0016829|GO:0016836|GO:0008270|GO:0004089|GO:0031233|GO:0006730|GO:0005886|GO:0016829|GO:0016836	zinc ion binding|carbonate dehydratase activity|intrinsic component of external side of plasma membrane|one-carbon metabolic process|plasma membrane|lyase activity|hydro-lyase activity|zinc ion binding|carbonate dehydratase activity|intrinsic component of external side of plasma membrane|one-carbon metabolic process|plasma membrane|lyase activity|hydro-lyase activity	Carbonic anhydrase 2 (CAH2) encodes an alpha-class carbonate dehydratase that catalyzes the reversible hydration/dehydration of carbon dioxide to bicarbonate and protons. [Date last reviewed: 2019-09-12]	Carbonic anhydrase 2	CAH2	-	-	-	-
FBgn0037464	3828.95	-0.311703	0.0860217	-3.62353	0.000290606	0.014626	CG1988	protein_coding			Insufficient genetic data for FlyBase to solicit a summary. [Date last reviewed: 2016-06-30]	Male-specific transcript 84B	Mst84B	-	-	-	-
FBgn0030594	1833.3	0.659424	0.182014	3.62294	0.000291273	0.014626	fiz	protein_coding	GO:0055114|GO:0016491|GO:0050660|GO:0007498|GO:0045455|GO:0016614|GO:0055114|GO:0016491|GO:0050660|GO:0007498|GO:0045455|GO:0016614	oxidation-reduction process|oxidoreductase activity|flavin adenine dinucleotide binding|mesoderm development|ecdysteroid metabolic process|oxidoreductase activity, acting on CH-OH group of donors|oxidation-reduction process|oxidoreductase activity|flavin adenine dinucleotide binding|mesoderm development|ecdysteroid metabolic process|oxidoreductase activity, acting on CH-OH group of donors	Insufficient genetic data for FlyBase to solicit a summary. [Date last reviewed: 2016-06-30]	fezzik	fiz	-	-	-	-
FBgn0030773	357.52	-0.55846	0.154217	-3.62125	0.000293179	0.0146727	CG9676	protein_coding	GO:0006508|GO:0004252|GO:0008236|GO:0016787	proteolysis|serine-type endopeptidase activity|serine-type peptidase activity|hydrolase activity	-	-	CG9676	-	-	-	-
FBgn0037060	352.335	-0.449417	0.124178	-3.61915	0.00029557	0.0147052	CG10508	protein_coding	GO:0005515|GO:0005515|GO:0005515|GO:0005515	protein binding|protein binding|protein binding|protein binding	Insufficient genetic data for FlyBase to solicit a summary. [Date last reviewed: 2016-06-30]	-	CG10508	-	-	-	-
FBgn0050395	4520.29	0.322954	0.0892394	3.61896	0.000295789	0.0147052	CG30395	protein_coding	GO:0005615|GO:0032504|GO:0003674	extracellular space|multicellular organism reproduction|molecular_function	Insufficient genetic data for FlyBase to solicit a summary. [Date last reviewed: 2016-06-30]	-	CG30395	-	-	-	-
FBgn0028950	1356.6	-0.540873	0.149553	-3.6166	0.000298503	0.0147912	CG15255	protein_coding	GO:0006508|GO:0008270|GO:0004222|GO:0008237|GO:0016787|GO:0046872|GO:0008233|GO:0006508|GO:0008270|GO:0004222|GO:0008237|GO:0016787|GO:0046872|GO:0008233	proteolysis|zinc ion binding|metalloendopeptidase activity|metallopeptidase activity|hydrolase activity|metal ion binding|peptidase activity|proteolysis|zinc ion binding|metalloendopeptidase activity|metallopeptidase activity|hydrolase activity|metal ion binding|peptidase activity	Insufficient genetic data for FlyBase to solicit a summary. [Date last reviewed: 2016-06-30]	-	CG15255	-	-	-	-
FBgn0035355	395.49	-0.707723	0.195827	-3.61401	0.000301496	0.0148903	CG16985	protein_coding	GO:0047617|GO:0051289|GO:0016787	acyl-CoA hydrolase activity|protein homotetramerization|hydrolase activity	-	-	CG16985	-	-	-	-
FBgn0063649	249.605	0.59059	0.163785	3.60588	0.000311093	0.0153139	CG6006	protein_coding	GO:0016021|GO:0055085|GO:0022857|GO:0016020|GO:0016021|GO:0055085|GO:0022857|GO:0016020|GO:0016021|GO:0055085|GO:0022857|GO:0016020|GO:0016021|GO:0055085|GO:0022857|GO:0016020|GO:0016021|GO:0055085|GO:0022857|GO:0016020	integral component of membrane|transmembrane transport|transmembrane transporter activity|membrane|integral component of membrane|transmembrane transport|transmembrane transporter activity|membrane|integral component of membrane|transmembrane transport|transmembrane transporter activity|membrane|integral component of membrane|transmembrane transport|transmembrane transporter activity|membrane|int…	-	-	CG6006	-	-	-	-
FBgn0039656	120.875	-0.767965	0.213645	-3.59458	0.000324914	0.0159003	CG11951	protein_coding	GO:0005737|GO:0006508|GO:0008270|GO:0070006|GO:0043171|GO:0042277|GO:0008237|GO:0016787|GO:0046872|GO:0004177|GO:0008233	cytoplasm|proteolysis|zinc ion binding|metalloaminopeptidase activity|peptide catabolic process|peptide binding|metallopeptidase activity|hydrolase activity|metal ion binding|aminopeptidase activity|peptidase activity	-	-	CG11951	-	-	-	-
FBgn0083938	5197.36	0.336345	0.0935744	3.59441	0.000325123	0.0159003	BG642163	protein_coding	GO:0005615|GO:0032504|GO:0003674|GO:0005615|GO:0032504|GO:0003674	extracellular space|multicellular organism reproduction|molecular_function|extracellular space|multicellular organism reproduction|molecular_function	Insufficient genetic data for FlyBase to solicit a summary. [Date last reviewed: 2016-06-30]	BG642163	BG642163	-	-	-	-
FBgn0052061	732.058	-0.376826	0.104953	-3.59042	0.000330144	0.0160934	CG32061	protein_coding	GO:0016021|GO:0016020	integral component of membrane|membrane	Insufficient genetic data for FlyBase to solicit a summary. [Date last reviewed: 2016-10-13]	-	CG32061	-	-	-	-
FBgn0038795	175.015	0.800555	0.223114	3.58809	0.000333109	0.0161854	CG4335	protein_coding	GO:0055114|GO:0005506|GO:0005739|GO:0016702|GO:0016491|GO:0045329|GO:0050353|GO:0046872|GO:0051213	oxidation-reduction process|iron ion binding|mitochondrion|oxidoreductase activity, acting on single donors with incorporation of molecular oxygen, incorporation of two atoms of oxygen|oxidoreductase activity|carnitine biosynthetic process|trimethyllysine dioxygenase activity|metal ion binding|dioxygenase activity	Insufficient genetic data for FlyBase to solicit a summary. [Date last reviewed: 2016-06-30]	-	CG4335	-	-	-	-
FBgn0037485	153.488	0.570339	0.159078	3.58527	0.000336723	0.0163083	CG14606	protein_coding	GO:0016021|GO:0005887|GO:0055085|GO:0005351|GO:0022857|GO:0016020|GO:0016021|GO:0005887|GO:0055085|GO:0005351|GO:0022857|GO:0016020	integral component of membrane|integral component of plasma membrane|transmembrane transport|carbohydrate:proton symporter activity|transmembrane transporter activity|membrane|integral component of membrane|integral component of plasma membrane|transmembrane transport|carbohydrate:proton symporter activity|transmembrane transporter activity|membrane	Insufficient genetic data for FlyBase to solicit a summary. [Date last reviewed: 2016-06-30]	-	CG14606	-	-	-	-
FBgn0040510	1030.53	-0.466169	0.130477	-3.57282	0.000353163	0.0170436	ACXA	protein_coding	GO:0016021|GO:0035556|GO:0005887|GO:0004383|GO:0004016|GO:0007189|GO:0007283|GO:0009190|GO:0016020|GO:0016829|GO:0006171|GO:0007193|GO:0016021|GO:0035556|GO:0005887|GO:0004383|GO:0004016|GO:0007189|GO:0007283|GO:0009190|GO:0016020|GO:0016829|GO:0006171|GO:0007193|GO:0016021|GO:0035556|GO:0005887|GO:0004383|GO:0004016|GO:0007189|GO:0007283|GO:0009190|GO:0016020|GO:0016829|GO:0006171|GO:0007193|GO:…	integral component of membrane|intracellular signal transduction|integral component of plasma membrane|guanylate cyclase activity|adenylate cyclase activity|adenylate cyclase-activating G protein-coupled receptor signaling pathway|spermatogenesis|cyclic nucleotide biosynthetic process|membrane|lyase activity|cAMP biosynthetic process|adenylate cyclase-inhibiting G protein-coupled receptor signali…	Insufficient genetic data for FlyBase to solicit a summary. [Date last reviewed: 2016-06-30]	Adenylyl cyclase X A	ACXA	-	-	-	-
FBgn0038752	477.365	-0.449105	0.125727	-3.57207	0.000354176	0.0170436	CG4462	protein_coding	GO:0016021|GO:0055085|GO:0022857|GO:0016020	integral component of membrane|transmembrane transport|transmembrane transporter activity|membrane	-	-	CG4462	-	-	-	-
FBgn0039086	77.3016	-0.745384	0.208748	-3.57074	0.00035598	0.0170756	Ugt303B1	protein_coding	GO:0016021|GO:0016758|GO:0008194|GO:0043231|GO:0015020|GO:0016020|GO:0016740|GO:0016757|GO:0016021|GO:0016758|GO:0008194|GO:0043231|GO:0016020|GO:0016740|GO:0016757|GO:0015020	integral component of membrane|transferase activity, transferring hexosyl groups|UDP-glycosyltransferase activity|intracellular membrane-bounded organelle|glucuronosyltransferase activity|membrane|transferase activity|transferase activity, transferring glycosyl groups|integral component of membrane|transferase activity, transferring hexosyl groups|UDP-glycosyltransferase activity|intracellular me…	-	UDP-glycosyltransferase family 303 member B1	Ugt303B1	-	-	-	-
FBgn0267689	1531.47	-0.315434	0.0885145	-3.56364	0.000365747	0.0174883	CG46025	protein_coding	GO:0003674|GO:0008150|GO:0005575|GO:0003674|GO:0008150|GO:0005575|GO:0003674|GO:0008150|GO:0005575|GO:0003674|GO:0008150|GO:0005575	molecular_function|biological_process|cellular_component|molecular_function|biological_process|cellular_component|molecular_function|biological_process|cellular_component|molecular_function|biological_process|cellular_component	Insufficient genetic data for FlyBase to solicit a summary. [Date last reviewed: 2016-06-30]	-	CG46025	-	-	-	-
FBgn0041246	31.8679	1.22567	0.34451	3.55774	0.000374061	0.017829	Gr32a	protein_coding	GO:0016021|GO:0050913|GO:0005886|GO:0008527|GO:0030425|GO:0010037|GO:0043025|GO:0007635|GO:0008049|GO:0030424|GO:0007165|GO:0050909|GO:0016020|GO:0050912	integral component of membrane|sensory perception of bitter taste|plasma membrane|taste receptor activity|dendrite|response to carbon dioxide|neuronal cell body|chemosensory behavior|male courtship behavior|axon|signal transduction|sensory perception of taste|membrane|detection of chemical stimulus involved in sensory perception of taste	-	Gustatory receptor 32a	Gr32a	Gustatory receptor which mediates acceptance or avoidance behavior, depending on its substrates. Required for the response to N,N-Diethyl-meta-toluamide (DEET), the most widely used insect repellent worldwide. Functions as a pheromone receptor for a male inhibitory pheromone and promotes male-male aggression and suppresses male-male courtship. Also promotes preferentially virgin females courting …	Belongs to the insect chemoreceptor superfamily. Gustatory receptor (GR) family. Gr21a subfamily.	-	-
FBgn0265153	15.5236	-1.73344	0.487698	-3.55433	0.00037895	0.0180049	lncRNA:CR44222	ncRNA			-	long non-coding RNA:CR44222	lncRNA:CR44222	-	-	-	-
FBgn0034563	130.525	0.675658	0.190242	3.55158	0.000382925	0.0181364	CG15649	protein_coding			Insufficient genetic data for FlyBase to solicit a summary. [Date last reviewed: 2016-06-30]	-	CG15649	-	-	-	-
FBgn0033190	1515.36	-0.328512	0.0926066	-3.54739	0.000389068	0.0183556	Gpo2	protein_coding	GO:0055114|GO:0005739|GO:0005509|GO:0016491|GO:0006071|GO:0009331|GO:0046168|GO:0004367|GO:0052591|GO:0004368|GO:0006072|GO:0052590	oxidation-reduction process|mitochondrion|calcium ion binding|oxidoreductase activity|glycerol metabolic process|glycerol-3-phosphate dehydrogenase complex|glycerol-3-phosphate catabolic process|glycerol-3-phosphate dehydrogenase [NAD+] activity|sn-glycerol-3-phosphate:ubiquinone-8 oxidoreductase activity|glycerol-3-phosphate dehydrogenase (quinone) activity|glycerol-3-phosphate metabolic process…	Insufficient genetic data for FlyBase to solicit a summary. [Date last reviewed: 2016-06-30]	Glycerophosphate oxidase 2	Gpo2	-	-	-	-
FBgn0033723	65.4711	1.03464	0.291713	3.54676	0.000389997	0.0183556	CG13155	protein_coding	GO:0003674|GO:0008150|GO:0005575	molecular_function|biological_process|cellular_component	Insufficient genetic data for FlyBase to solicit a summary. [Date last reviewed: 2017-07-13]	-	CG13155	-	-	-	-
FBgn0040718	76.6368	-0.774809	0.218803	-3.54113	0.000398418	0.0186933	CG15353	protein_coding			Insufficient genetic data for FlyBase to solicit a summary. [Date last reviewed: 2016-06-30]	-	CG15353	-	-	-	-
FBgn0030981	87.0445	-1.04538	0.295469	-3.53804	0.000403103	0.0188542	CG14191	protein_coding			Insufficient genetic data for FlyBase to solicit a summary. [Date last reviewed: 2016-06-30]	-	CG14191	-	-	-	-
FBgn0030359	1073.5	-0.3213	0.0909807	-3.53152	0.000413178	0.0192445	CG18130	protein_coding	GO:0005623|GO:0045454|GO:0016740	cell|cell redox homeostasis|transferase activity	Insufficient genetic data for FlyBase to solicit a summary. [Date last reviewed: 2016-06-30]	-	CG18130	-	-	-	-
FBgn0263388	40.2003	-1.0875	0.307988	-3.53099	0.000414012	0.0192445	lncRNA:CR43440	ncRNA			-	long non-coding RNA:CR43440	lncRNA:CR43440	-	-	-	-
FBgn0034505	1307.23	-0.312369	0.0885387	-3.52805	0.000418636	0.0193994	CG16739	protein_coding	GO:0003674|GO:0008150|GO:0005575	molecular_function|biological_process|cellular_component	Insufficient genetic data for FlyBase to solicit a summary. [Date last reviewed: 2016-10-13]	-	CG16739	-	-	-	-
FBgn0050296	2568	0.366697	0.10409	3.52289	0.000426871	0.0197201	RIC-3	protein_coding	GO:0016021|GO:0043231|GO:0043025|GO:0051082|GO:0061077|GO:0007271|GO:0043005|GO:0034394|GO:0033130|GO:0022417|GO:0016020|GO:0005783|GO:0045202|GO:0016021|GO:0043231|GO:0043025|GO:0051082|GO:0061077|GO:0007271|GO:0043005|GO:0034394|GO:0033130|GO:0022417|GO:0016020|GO:0005783|GO:0045202|GO:0016021|GO:0043231|GO:0043025|GO:0051082|GO:0061077|GO:0007271|GO:0043005|GO:0034394|GO:0033130|GO:0022417|GO:…	integral component of membrane|intracellular membrane-bounded organelle|neuronal cell body|unfolded protein binding|chaperone-mediated protein folding|synaptic transmission, cholinergic|neuron projection|protein localization to cell surface|acetylcholine receptor binding|protein maturation by protein folding|membrane|endoplasmic reticulum|synapse|integral component of membrane|intracellular membr…	RIC3 acetylcholine receptor chaperone (RIC-3) encodes a protein that assists with nicotinic acetylcholine receptor protein folding. [Date last reviewed: 2018-11-15]	RIC3 acetylcholine receptor chaperone	RIC-3	-	-	-	-
FBgn0053340	14828	-0.282216	0.080136	-3.52172	0.00042876	0.0197466	CG33340	protein_coding	GO:0003674|GO:0008150|GO:0005575	molecular_function|biological_process|cellular_component	Insufficient genetic data for FlyBase to solicit a summary. [Date last reviewed: 2016-06-30]	-	CG33340	-	-	-	-
FBgn0034121	4944.92	-0.287736	0.0818112	-3.51707	0.000436331	0.0200338	CG6262	protein_coding	GO:0008152|GO:0004555|GO:0016787|GO:0016798|GO:0003824|GO:0004555|GO:0005991|GO:0016787|GO:0008152|GO:0016798|GO:0003824|GO:0004555|GO:0005991|GO:0016787|GO:0008152|GO:0016798	metabolic process|alpha,alpha-trehalase activity|hydrolase activity|hydrolase activity, acting on glycosyl bonds|catalytic activity|alpha,alpha-trehalase activity|trehalose metabolic process|hydrolase activity|metabolic process|hydrolase activity, acting on glycosyl bonds|catalytic activity|alpha,alpha-trehalase activity|trehalose metabolic process|hydrolase activity|metabolic process|hydrolase a…	Insufficient genetic data for FlyBase to solicit a summary. [Date last reviewed: 2016-06-30]	-	CG6262	-	-	-	-
FBgn0052026	2650.5	-0.304732	0.086665	-3.5162	0.000437767	0.0200385	CG32026	protein_coding	GO:0055114|GO:0005739|GO:0006099|GO:0000287|GO:0051287|GO:0004449|GO:0006102|GO:0016616|GO:0016491	oxidation-reduction process|mitochondrion|tricarboxylic acid cycle|magnesium ion binding|NAD binding|isocitrate dehydrogenase (NAD+) activity|isocitrate metabolic process|oxidoreductase activity, acting on the CH-OH group of donors, NAD or NADP as acceptor|oxidoreductase activity	Insufficient genetic data for FlyBase to solicit a summary. [Date last reviewed: 2016-06-30]	-	CG32026	-	-	-	-
FBgn0033980	552.818	-0.520558	0.148101	-3.5149	0.000439925	0.0200761	Cyp6a20	protein_coding	GO:0055114|GO:0005506|GO:0005789|GO:0020037|GO:0016705|GO:0004497|GO:0050829|GO:0002118|GO:0016020|GO:0046872|GO:0005783|GO:0016491|GO:0031090|GO:0043231	oxidation-reduction process|iron ion binding|endoplasmic reticulum membrane|heme binding|oxidoreductase activity, acting on paired donors, with incorporation or reduction of molecular oxygen|monooxygenase activity|defense response to Gram-negative bacterium|aggressive behavior|membrane|metal ion binding|endoplasmic reticulum|oxidoreductase activity|organelle membrane|intracellular membrane-bounde…	Cyp6a20 (Cyp6a20) encodes a protein that may function to degrade aggression-promoting pheromones based on indirect observations such as its expression pattern and the increased aggressive behavior shown in Cyp6a20 mutants. [Date last reviewed: 2019-03-07]	Cyp6a20	Cyp6a20	May be involved in the metabolism of insect hormones and in the breakdown of synthetic insecticides.	Belongs to the cytochrome P450 family.	-	-
FBgn0053265	98.6134	0.777349	0.22132	3.51232	0.000444206	0.02021	Muc68E	protein_coding	GO:0005576|GO:0031012|GO:0008061|GO:0006030|GO:0005201	extracellular region|extracellular matrix|chitin binding|chitin metabolic process|extracellular matrix structural constituent	Insufficient genetic data for FlyBase to solicit a summary. [Date last reviewed: 2016-06-30]	Mucin 68E	Muc68E	-	-	-	-
FBgn0031829	64.9237	0.921223	0.262604	3.50802	0.000451449	0.0204775	IFT52	protein_coding	GO:0005814|GO:0005871|GO:0007018|GO:0060271|GO:0005929|GO:0031514|GO:0030992|GO:0030990|GO:0042073|GO:0003674	centriole|kinesin complex|microtubule-based movement|cilium assembly|cilium|motile cilium|intraciliary transport particle B|intraciliary transport particle|intraciliary transport|molecular_function	Insufficient genetic data for FlyBase to solicit a summary. [Date last reviewed: 2016-06-30]	Intraflagellar transport 52	IFT52	-	-	-	-
FBgn0264476	40.5747	-0.982851	0.280246	-3.5071	0.000453019	0.0204868	lncRNA:CR43884	ncRNA			-	long non-coding RNA:CR43884	lncRNA:CR43884	-	-	-	-
FBgn0011591	232.027	0.515486	0.147077	3.50486	0.000456841	0.0205976	fng	protein_coding	GO:0046872|GO:0005737|GO:0005783|GO:0001745|GO:0048190|GO:0007476|GO:0006493|GO:0005794|GO:0048749|GO:0016020|GO:0030173|GO:0045747|GO:0030707|GO:0005795|GO:0036099|GO:0016757|GO:0036011|GO:0048100|GO:0008587|GO:0007293|GO:0008375|GO:0005797|GO:0035017|GO:0007450|GO:0033829|GO:0008593|GO:0036066|GO:0007389|GO:0016021|GO:0016740|GO:0007480|GO:0045746|GO:0006486|GO:0000139|GO:0007275|GO:0043393	metal ion binding|cytoplasm|endoplasmic reticulum|compound eye morphogenesis|wing disc dorsal/ventral pattern formation|imaginal disc-derived wing morphogenesis|protein O-linked glycosylation|Golgi apparatus|compound eye development|membrane|integral component of Golgi membrane|positive regulation of Notch signaling pathway|ovarian follicle cell development|Golgi stack|female germ-line stem cell …	fringe (fng) encodes a glycosyltransferase that modifies EGF domains of the product of N. This glycosylation enhances the interactions the product of N with its ligand encoded by Dl, and inhibits those with its ligand encoded by Ser. In this way the product of fng modulates Notch signaling. [Date last reviewed: 2019-03-07]	fringe	fng	Glycosyltransferase involved in the elongation of O-linked ligands to activate Notch signaling. Possesses fucose-specific beta-1,3-N-acetylglucosaminyltransferase activity; extends the O-linked fucose on the Notch EGF repeats. Boundary-specific cell-signaling molecule that is responsible for dorsal-ventral cell interactions during wing development.	Belongs to the glycosyltransferase 31 family.	-	-
FBgn0043825	3822.92	0.281845	0.0804562	3.50309	0.000459897	0.0206733	CG18284	protein_coding	GO:0005615|GO:0032504|GO:0016298|GO:0006629|GO:0044255|GO:0016788|GO:0016787|GO:0005615|GO:0032504|GO:0016298|GO:0006629|GO:0044255|GO:0016788|GO:0016787	extracellular space|multicellular organism reproduction|lipase activity|lipid metabolic process|cellular lipid metabolic process|hydrolase activity, acting on ester bonds|hydrolase activity|extracellular space|multicellular organism reproduction|lipase activity|lipid metabolic process|cellular lipid metabolic process|hydrolase activity, acting on ester bonds|hydrolase activity	Insufficient genetic data for FlyBase to solicit a summary. [Date last reviewed: 2016-06-30]	-	CG18284	-	-	-	-
FBgn0031545	11577.9	-0.248016	0.0708331	-3.50142	0.000462787	0.0207101	CG3213	protein_coding	GO:0005737|GO:0005815	cytoplasm|microtubule organizing center	Insufficient genetic data for FlyBase to solicit a summary. [Date last reviewed: 2016-06-30]	-	CG3213	-	-	-	-
FBgn0051463	104.388	-0.986238	0.2817	-3.50102	0.000463475	0.0207101	CG31463	protein_coding			Insufficient genetic data for FlyBase to solicit a summary. [Date last reviewed: 2016-06-30]	-	CG31463	-	-	-	-
FBgn0011296	1226.76	0.378663	0.108262	3.49766	0.000469367	0.0208938	l(2)efl	protein_coding	GO:0046872|GO:0048471|GO:0051082|GO:0042026|GO:0061077|GO:0010998|GO:0007275|GO:0030018|GO:0009408|GO:0045214|GO:0046872|GO:0048471|GO:0051082|GO:0042026|GO:0061077|GO:0010998|GO:0007275|GO:0030018|GO:0009408|GO:0045214	metal ion binding|perinuclear region of cytoplasm|unfolded protein binding|protein refolding|chaperone-mediated protein folding|regulation of translational initiation by eIF2 alpha phosphorylation|multicellular organism development|Z disc|response to heat|sarcomere organization|metal ion binding|perinuclear region of cytoplasm|unfolded protein binding|protein refolding|chaperone-mediated protein …	Insufficient genetic data for FlyBase to solicit a summary. [Date last reviewed: 2016-06-30]	lethal (2) essential for life	l(2)efl	Vital role in embryonic development.	Belongs to the small heat shock protein (HSP20) family.	-	-
FBgn0264514	77.3439	0.749326	0.214271	3.49709	0.000470368	0.0208938	lncRNA:CR43913	ncRNA			-	long non-coding RNA:CR43913	lncRNA:CR43913	-	-	-	-
FBgn0265897	20.479	-1.54285	0.441613	-3.49367	0.000476427	0.0211005	lncRNA:CR44686	ncRNA			-	long non-coding RNA:CR44686	lncRNA:CR44686	-	-	-	-
FBgn0043471	889.155	-0.513571	0.147083	-3.49171	0.000479935	0.0211934	kappaTry	protein_coding	GO:0006508|GO:0004252|GO:0008236|GO:0016787	proteolysis|serine-type endopeptidase activity|serine-type peptidase activity|hydrolase activity	Insufficient genetic data for FlyBase to solicit a summary. [Date last reviewed: 2016-06-30]	kappaTry	kappaTry	-	-	-	-
FBgn0038292	472.399	-0.511939	0.1468	-3.48732	0.000487885	0.0214813	CG3987	protein_coding	GO:0007498	mesoderm development	-	-	CG3987	-	-	-	-
FBgn0015035	105.658	1.14743	0.329335	3.48408	0.000493826	0.0216793	Cyp4e3	protein_coding	GO:0005783|GO:0055114|GO:0005506|GO:0005789|GO:0020037|GO:0016705|GO:0004497|GO:0016020|GO:0046872|GO:0016491|GO:0031090|GO:0043231	endoplasmic reticulum|oxidation-reduction process|iron ion binding|endoplasmic reticulum membrane|heme binding|oxidoreductase activity, acting on paired donors, with incorporation or reduction of molecular oxygen|monooxygenase activity|membrane|metal ion binding|oxidoreductase activity|organelle membrane|intracellular membrane-bounded organelle	Cytochrome P450-4e3 (Cyp4e3) encodes an endoplasmic reticulum protein that plays a role in insecticide tolerance. Upon insecticide feeding Cyp4e3 is significantly up-regulated. Cyp4e3 knockdown in the Malpighian tubule principal cells reduces survival of insecticide-fed flies. Cyp4e3 protein may also regulate hydrogen peroxide levels in the endoplasmic reticulum and its absence triggers JAK/STAT …	Cytochrome P450-4e3	Cyp4e3	May be involved in the metabolism of insect hormones and in the breakdown of synthetic insecticides.	Belongs to the cytochrome P450 family.	-	-
FBgn0039616	584.5	0.396893	0.113985	3.48196	0.000497752	0.0217879	CG11828	protein_coding	GO:0005783|GO:0055114|GO:0005506|GO:0016705|GO:0032504|GO:0018401|GO:0016702|GO:0004656|GO:0031418|GO:0016020|GO:0016021|GO:0016491|GO:0051213|GO:0019511|GO:0005515	endoplasmic reticulum|oxidation-reduction process|iron ion binding|oxidoreductase activity, acting on paired donors, with incorporation or reduction of molecular oxygen|multicellular organism reproduction|peptidyl-proline hydroxylation to 4-hydroxy-L-proline|oxidoreductase activity, acting on single donors with incorporation of molecular oxygen, incorporation of two atoms of oxygen|procollagen-pr…	Insufficient genetic data for FlyBase to solicit a summary. [Date last reviewed: 2016-06-30]	-	CG11828	-	-	-	-
FBgn0267218	10.7478	2.26957	0.652143	3.48018	0.000501079	0.0218698	lncRNA:CR45658	ncRNA			-	long non-coding RNA:CR45658	lncRNA:CR45658	-	-	-	-
FBgn0039597	1356.71	0.342879	0.0986144	3.47696	0.000507125	0.0220695	CG9997	protein_coding	GO:0006508|GO:0004252|GO:0005615|GO:0032504|GO:0016787|GO:0008104|GO:0046008|GO:0046692|GO:0006508|GO:0004252|GO:0005615|GO:0032504|GO:0016787|GO:0008104|GO:0046008|GO:0046692	proteolysis|serine-type endopeptidase activity|extracellular space|multicellular organism reproduction|hydrolase activity|protein localization|regulation of female receptivity, post-mating|sperm competition|proteolysis|serine-type endopeptidase activity|extracellular space|multicellular organism reproduction|hydrolase activity|protein localization|regulation of female receptivity, post-mating|spe…	CG9997 encodes a protein with homology to serine-type endopeptidases, but is not predicted to have catalytic activity due to mutations in its active site. It is produced in the male accessory gland and transferred to females during mating. In males, it is required for other seminal proteins to be transferred to mated females. In mated females, it is required for the binding of the product of SP t…	-	CG9997	-	-	-	-
FBgn0033913	1062.68	0.348482	0.100262	3.47572	0.000509483	0.0220943	CG8468	protein_coding	GO:0016021|GO:0055085|GO:0022857|GO:0008028|GO:0016020|GO:0015718|GO:0016021|GO:0055085|GO:0022857|GO:0008028|GO:0016020|GO:0015718|GO:0016021|GO:0055085|GO:0022857|GO:0008028|GO:0016020|GO:0015718	integral component of membrane|transmembrane transport|transmembrane transporter activity|monocarboxylic acid transmembrane transporter activity|membrane|monocarboxylic acid transport|integral component of membrane|transmembrane transport|transmembrane transporter activity|monocarboxylic acid transmembrane transporter activity|membrane|monocarboxylic acid transport|integral component of membrane|…	Insufficient genetic data for FlyBase to solicit a summary. [Date last reviewed: 2016-06-30]	-	CG8468	-	-	-	-
FBgn0029843	414.686	0.386554	0.111235	3.47511	0.000510637	0.0220943	Nep1	protein_coding	GO:0016021|GO:0046872|GO:0005886|GO:0006508|GO:0004222|GO:0008237|GO:0016020|GO:0016787|GO:0008233|GO:0016021|GO:0046872|GO:0005886|GO:0006508|GO:0004222|GO:0008237|GO:0016020|GO:0016787|GO:0008233|GO:0016021|GO:0046872|GO:0005886|GO:0006508|GO:0004222|GO:0008237|GO:0016020|GO:0016787|GO:0008233|GO:0016021|GO:0046872|GO:0005886|GO:0006508|GO:0004222|GO:0008237|GO:0016020|GO:0016787|GO:0008233	integral component of membrane|metal ion binding|plasma membrane|proteolysis|metalloendopeptidase activity|metallopeptidase activity|membrane|hydrolase activity|peptidase activity|integral component of membrane|metal ion binding|plasma membrane|proteolysis|metalloendopeptidase activity|metallopeptidase activity|membrane|hydrolase activity|peptidase activity|integral component of membrane|metal io…	Neprilysin 1 (Nep1) encodes a plasma membrane bound metallopeptidase considered to cleave and thus inactivate signaling peptides in the extracellular space. It contributes to female and male fertility. [Date last reviewed: 2019-03-14]	Neprilysin 1	Nep1	Metalloendoprotease which functions in fertility and memory formation (PubMed:24395329, PubMed:27629706). Required in the dorsal paired medial neurons and alpha/beta mushroom body neurons for the proper formation of long-term and middle-term memories (PubMed:27629706). Required in males to maximise egg-laying in female mates and is also required in females for their fertility (PubMed:24395329).	Belongs to the peptidase M13 family.	-	-
FBgn0264086	6001.08	-0.309638	0.0891361	-3.47377	0.000513201	0.0221414	CG43755	protein_coding	GO:0003674|GO:0008150|GO:0005575|GO:0003674|GO:0008150|GO:0005575	molecular_function|biological_process|cellular_component|molecular_function|biological_process|cellular_component	Insufficient genetic data for FlyBase to solicit a summary. [Date last reviewed: 2016-10-13]	-	CG43755	-	-	-	-
FBgn0265042	828.772	0.430381	0.124034	3.46986	0.000520721	0.0224015	Irk1	protein_coding	GO:0016021|GO:0045475|GO:0042391|GO:0035220|GO:0034765|GO:0006813|GO:1990573|GO:0005242|GO:0071805|GO:0016020|GO:0006811|GO:0034220|GO:0005886|GO:0005244|GO:0016021|GO:0045475|GO:0042391|GO:0035220|GO:0034765|GO:0006813|GO:0005242|GO:0071805|GO:0016020|GO:0006811|GO:0034220|GO:0005244|GO:0016021|GO:0045475|GO:0042391|GO:0035220|GO:0034765|GO:0006813|GO:0005242|GO:0071805|GO:0016020|GO:0006811|GO:…	integral component of membrane|locomotor rhythm|regulation of membrane potential|wing disc development|regulation of ion transmembrane transport|potassium ion transport|potassium ion import across plasma membrane|inward rectifier potassium channel activity|potassium ion transmembrane transport|membrane|ion transport|ion transmembrane transport|plasma membrane|voltage-gated ion channel activity|in…	Inwardly rectifying potassium channel 1 (Irk1) encodes a K[+] channel involved in transepithelial ion transport in the renal tubule and in regulating excitability of the LNv subset of circadian pacemaker neurons. [Date last reviewed: 2019-03-07]	Inwardly rectifying potassium channel 1	Irk1	-	-	-	-
FBgn0032868	2599.23	0.430556	0.124156	3.46785	0.000524641	0.0225056	CG17472	protein_coding	GO:0005615|GO:0032504|GO:0003674	extracellular space|multicellular organism reproduction|molecular_function	Insufficient genetic data for FlyBase to solicit a summary. [Date last reviewed: 2016-06-30]	-	CG17472	-	-	-	-
FBgn0261060	527.307	-0.52768	0.152219	-3.46658	0.000527134	0.0225481	Sfp93F	protein_coding	GO:0005615|GO:0032504|GO:0003674	extracellular space|multicellular organism reproduction|molecular_function	-	Seminal fluid protein 93F	Sfp93F	-	-	-	-
FBgn0263399	11.1107	-1.9517	0.563553	-3.4632	0.0005338	0.022617	CG43445	protein_coding	GO:0003674|GO:0008150|GO:0005575	molecular_function|biological_process|cellular_component	Insufficient genetic data for FlyBase to solicit a summary. [Date last reviewed: 2016-10-13]	-	CG43445	-	-	-	-
FBgn0050364	1847.4	-0.312251	0.0901682	-3.46298	0.000534219	0.022617	hubl	protein_coding	GO:0003674|GO:0008150|GO:0005575|GO:0003674|GO:0008150|GO:0005575	molecular_function|biological_process|cellular_component|molecular_function|biological_process|cellular_component	Insufficient genetic data for FlyBase to solicit a summary. [Date last reviewed: 2016-06-30]	hug-bell	hubl	-	-	-	-
FBgn0050365	1847.4	-0.312251	0.0901682	-3.46298	0.000534219	0.022617	spaw	protein_coding	GO:0003674|GO:0008150|GO:0005575|GO:0003674|GO:0008150|GO:0005575	molecular_function|biological_process|cellular_component|molecular_function|biological_process|cellular_component	Insufficient genetic data for FlyBase to solicit a summary. [Date last reviewed: 2016-06-30]	spacewatch	spaw	-	-	-	-
FBgn0264994	14.3906	-1.92705	0.556516	-3.46271	0.000534771	0.022617	lncRNA:CR44145	ncRNA			-	long non-coding RNA:CR44145	lncRNA:CR44145	-	-	-	-
FBgn0263081	773.068	-0.320236	0.0925044	-3.46185	0.00053648	0.0226256	CG43349	protein_coding	GO:0003674|GO:0008150|GO:0005575|GO:0003674|GO:0008150|GO:0005575	molecular_function|biological_process|cellular_component|molecular_function|biological_process|cellular_component	Insufficient genetic data for FlyBase to solicit a summary. [Date last reviewed: 2016-10-13]	-	CG43349	-	-	-	-
FBgn0033683	599.284	-0.449903	0.130094	-3.45828	0.000543631	0.02281	CG18343	protein_coding	GO:0016021|GO:0016020|GO:0016021|GO:0016020	integral component of membrane|membrane|integral component of membrane|membrane	Insufficient genetic data for FlyBase to solicit a summary. [Date last reviewed: 2016-06-30]	-	CG18343	-	-	-	-
FBgn0033900	1657.86	-0.290655	0.0840491	-3.45815	0.00054389	0.02281	CysRS-m	protein_coding	GO:0005737|GO:0005524|GO:0000166|GO:0005739|GO:0006423|GO:0004817|GO:0006418|GO:0046872|GO:0016874|GO:0006412|GO:0004812|GO:0005737|GO:0005524|GO:0000166|GO:0005739|GO:0006423|GO:0004817|GO:0006418|GO:0046872|GO:0016874|GO:0006412|GO:0004812	cytoplasm|ATP binding|nucleotide binding|mitochondrion|cysteinyl-tRNA aminoacylation|cysteine-tRNA ligase activity|tRNA aminoacylation for protein translation|metal ion binding|ligase activity|translation|aminoacyl-tRNA ligase activity|cytoplasm|ATP binding|nucleotide binding|mitochondrion|cysteinyl-tRNA aminoacylation|cysteine-tRNA ligase activity|tRNA aminoacylation for protein translation|meta…	Insufficient genetic data for FlyBase to solicit a summary. [Date last reviewed: 2016-06-30]	Cysteinyl-tRNA synthetase, mitochondrial	CysRS-m	-	-	-	-
FBgn0029676	297.33	-0.555724	0.160844	-3.45504	0.000550203	0.0230104	HIP-R	protein_coding	GO:0005737|GO:0005829|GO:0051087|GO:0046983|GO:0032991|GO:0031072|GO:0030544|GO:0051085|GO:0061077|GO:0065003|GO:0005515|GO:0005737|GO:0005829|GO:0051087|GO:0046983|GO:0032991|GO:0031072|GO:0030544|GO:0051085|GO:0061077|GO:0065003|GO:0005515|GO:0005737|GO:0005829|GO:0051087|GO:0046983|GO:0032991|GO:0031072|GO:0030544|GO:0051085|GO:0061077|GO:0065003|GO:0005515	cytoplasm|cytosol|chaperone binding|protein dimerization activity|protein-containing complex|heat shock protein binding|Hsp70 protein binding|chaperone cofactor-dependent protein refolding|chaperone-mediated protein folding|protein-containing complex assembly|protein binding|cytoplasm|cytosol|chaperone binding|protein dimerization activity|protein-containing complex|heat shock protein binding|Hsp…	Hsc/Hsp70-interacting protein related (HIP-R) encodes an ortholog of the human Hsp70 interacting protein (HIP), which is a co-chaperone that stabilizes the ADP-bound conformation of Hsp70. [Date last reviewed: 2018-10-11]	Hsc/Hsp70-interacting protein related	HIP-R	One HIP oligomer binds the ATPase domains of at least two Hsc70 molecules dependent on activation of the Hsc70 ATPase by Hsp40. Stabilizes the ADP state of Hsc70 that has a high affinity for substrate protein. Through its own chaperone activity, it may contribute to the interaction of Hsc70 with various target proteins (By similarity).	Belongs to the FAM10 family.	Homotetramer. Interacts with Hsc70 as well as DNAJ homologs and Hsp90 (By similarity).	-
FBgn0034546	1754.01	-0.360241	0.104293	-3.45412	0.000552097	0.0230255	CG13442	protein_coding	GO:0016021|GO:0008270|GO:0004842|GO:0000209|GO:0005764|GO:0005768|GO:0016020|GO:0016567|GO:0061630	integral component of membrane|zinc ion binding|ubiquitin-protein transferase activity|protein polyubiquitination|lysosome|endosome|membrane|protein ubiquitination|ubiquitin protein ligase activity	-	-	CG13442	-	-	-	-
FBgn0034863	584.351	-0.41121	0.119168	-3.45068	0.000559174	0.0232561	SkpF	protein_coding	GO:0016567|GO:0006511|GO:0019005|GO:0005634|GO:0005737|GO:0031146|GO:0097602	protein ubiquitination|ubiquitin-dependent protein catabolic process|SCF ubiquitin ligase complex|nucleus|cytoplasm|SCF-dependent proteasomal ubiquitin-dependent protein catabolic process|cullin family protein binding	Insufficient genetic data for FlyBase to solicit a summary. [Date last reviewed: 2016-06-30]	SKP1-related F	SkpF	-	-	-	-
FBgn0031942	3511.86	0.670142	0.194609	3.44353	0.000574171	0.0238138	CG7203	protein_coding			Insufficient genetic data for FlyBase to solicit a summary. [Date last reviewed: 2016-06-30]	-	CG7203	-	-	-	-
FBgn0028669	1016.83	-0.318801	0.0926283	-3.44172	0.000578018	0.0239073	Vha100-3	protein_coding	GO:0016021|GO:0005886|GO:0016787|GO:0046961|GO:0015991|GO:0000220|GO:0015078|GO:1902600|GO:0007035|GO:0016471|GO:0051117|GO:0033179|GO:0016020|GO:0006811	integral component of membrane|plasma membrane|hydrolase activity|proton-transporting ATPase activity, rotational mechanism|GO_0015991|vacuolar proton-transporting V-type ATPase, V0 domain|proton transmembrane transporter activity|proton transmembrane transport|vacuolar acidification|vacuolar proton-transporting V-type ATPase complex|ATPase binding|proton-transporting V-type ATPase, V0 domain|mem…	Insufficient genetic data for FlyBase to solicit a summary. [Date last reviewed: 2016-06-30]	Vacuolar H[+] ATPase 100kD subunit 3	Vha100-3	-	-	-	-
FBgn0053319	485.323	-0.767533	0.223198	-3.43879	0.00058431	0.0241012	CR33319	pseudogene			-	-	CR33319	-	-	-	-
FBgn0265785	106.917	0.681453	0.198362	3.4354	0.000591688	0.0243387	CG44574	protein_coding	GO:0003674|GO:0008150|GO:0005575	molecular_function|biological_process|cellular_component	Insufficient genetic data for FlyBase to solicit a summary. [Date last reviewed: 2016-10-13]	-	CG44574	-	-	-	-
FBgn0034459	2086.58	-0.304024	0.0886264	-3.43039	0.000602704	0.024724	TTLL6A	protein_coding	GO:0005524|GO:0018094|GO:0070735|GO:0006464|GO:0016874|GO:0000226|GO:0005929|GO:0015631|GO:0070740|GO:0018095	ATP binding|protein polyglycylation|protein-glycine ligase activity|cellular protein modification process|ligase activity|microtubule cytoskeleton organization|cilium|tubulin binding|tubulin-glutamic acid ligase activity|protein polyglutamylation	Insufficient genetic data for FlyBase to solicit a summary. [Date last reviewed: 2016-06-30]	Tubulin tyrosine ligase-like 6A	TTLL6A	-	-	-	-
FBgn0042105	155.224	-0.541073	0.157875	-3.42723	0.000609781	0.0249462	CG18748	protein_coding	GO:0005737|GO:0015031|GO:0005737|GO:0015031	cytoplasm|protein transport|cytoplasm|protein transport	Insufficient genetic data for FlyBase to solicit a summary. [Date last reviewed: 2016-10-13]	-	CG18748	-	-	-	-
FBgn0262583	634.691	0.437486	0.127794	3.42337	0.000618492	0.0252338	CG43123	protein_coding	GO:0003674|GO:0008150|GO:0005575	molecular_function|biological_process|cellular_component	Insufficient genetic data for FlyBase to solicit a summary. [Date last reviewed: 2016-10-13]	-	CG43123	-	-	-	-
FBgn0033065	604.521	0.586537	0.171433	3.42137	0.000623054	0.0253028	Cyp6w1	protein_coding	GO:0055114|GO:0005506|GO:0005789|GO:0020037|GO:0016705|GO:0004497|GO:0007608|GO:0046680|GO:0046701|GO:0016020|GO:0046872|GO:0005783|GO:0016491|GO:0031090|GO:0043231|GO:0055114|GO:0005506|GO:0005789|GO:0020037|GO:0016705|GO:0004497|GO:0007608|GO:0046680|GO:0046701|GO:0016020|GO:0046872|GO:0005783|GO:0016491|GO:0031090|GO:0043231	oxidation-reduction process|iron ion binding|endoplasmic reticulum membrane|heme binding|oxidoreductase activity, acting on paired donors, with incorporation or reduction of molecular oxygen|monooxygenase activity|sensory perception of smell|response to DDT|insecticide catabolic process|membrane|metal ion binding|endoplasmic reticulum|oxidoreductase activity|organelle membrane|intracellular membr…	Insufficient genetic data for FlyBase to solicit a summary. [Date last reviewed: 2016-06-30]	Cyp6w1	Cyp6w1	May be involved in the metabolism of insect hormones and in the breakdown of synthetic insecticides.	Belongs to the cytochrome P450 family.	-	-
FBgn0039081	934.743	0.304256	0.0889425	3.42081	0.00062434	0.0253028	Irk2	protein_coding	GO:0016021|GO:0042391|GO:0035220|GO:0034765|GO:0006813|GO:0005242|GO:0071805|GO:0016020|GO:0006811|GO:0034220|GO:0005244|GO:0016021|GO:0042391|GO:0035220|GO:0034765|GO:0006813|GO:0005242|GO:0071805|GO:0016020|GO:0006811|GO:0034220|GO:0005244|GO:0016021|GO:0042391|GO:0035220|GO:0034765|GO:0006813|GO:0005242|GO:0071805|GO:0016020|GO:0006811|GO:0034220|GO:0005244|GO:0016021|GO:0042391|GO:0035220|GO:…	integral component of membrane|regulation of membrane potential|wing disc development|regulation of ion transmembrane transport|potassium ion transport|inward rectifier potassium channel activity|potassium ion transmembrane transport|membrane|ion transport|ion transmembrane transport|voltage-gated ion channel activity|integral component of membrane|regulation of membrane potential|wing disc devel…	Inwardly rectifying potassium channel 2 (Irk2) encodes a protein that is required in transepithelial fluid secretion and potassium transport in the Malpighian tubule. It contributes to wing patterning, through the regulation of release of the product of dpp. [Date last reviewed: 2018-11-08]	Inwardly rectifying potassium channel 2	Irk2	-	-	-	-
FBgn0032049	6922.22	-0.424397	0.124077	-3.42042	0.00062524	0.0253028	Bace	protein_coding	GO:0006508|GO:0016540|GO:0030163|GO:0004190|GO:1902944|GO:0016740|GO:0016787|GO:0008233|GO:0030424|GO:0043025|GO:0005768|GO:0016779|GO:0005764|GO:0008219|GO:0042987|GO:0006508|GO:0016540|GO:0030163|GO:0004190|GO:1902944|GO:0016740|GO:0016787|GO:0008233|GO:0030424|GO:0043025|GO:0005768|GO:0016779|GO:0005764|GO:0008219|GO:0042987	proteolysis|protein autoprocessing|protein catabolic process|aspartic-type endopeptidase activity|aspartic-type endopeptidase activity involved in amyloid precursor protein catabolic process|transferase activity|hydrolase activity|peptidase activity|axon|neuronal cell body|endosome|nucleotidyltransferase activity|lysosome|cell death|amyloid precursor protein catabolic process|proteolysis|protein …	beta-site APP-cleaving enzyme (Bace) encodes an aspartic protease that cleaves amyloid precursor proteins. It contributes to glial cell survival and enhances neuronal degeneration caused by expression of Appl. In humans, Bace, together with the Œ≥-secretase complex, generates the toxic AŒ≤ peptide that accumulates in Alzheimer's disease. [Date last reviewed: 2019-03-07]	beta-site APP-cleaving enzyme	Bace	-	-	-	-
FBgn0264338	30.8065	1.34631	0.393808	3.41868	0.000629248	0.0253966	lncRNA:CR43794	ncRNA			-	long non-coding RNA:CR43794	lncRNA:CR43794	-	-	-	-
FBgn0004647	330.635	0.599444	0.175437	3.41685	0.000633493	0.0254994	N	protein_coding	GO:0005634|GO:0016021|GO:0005737|GO:0007616|GO:0005829|GO:0005886|GO:0009986|GO:0001745|GO:0005912|GO:0005887|GO:0007346|GO:0005654|GO:0048190|GO:0030139|GO:0016360|GO:0045944|GO:0005509|GO:0048477|GO:0008340|GO:0007476|GO:0002052|GO:0007411|GO:0005788|GO:0045893|GO:0007419|GO:0005769|GO:0007391|GO:0003682|GO:0010628|GO:0007298|GO:0042067|GO:0030154|GO:0050767|GO:0007275|GO:0035003|GO:0010629|GO:…	nucleus|integral component of membrane|cytoplasm|long-term memory|cytosol|plasma membrane|cell surface|compound eye morphogenesis|adherens junction|integral component of plasma membrane|regulation of mitotic cell cycle|nucleoplasm|wing disc dorsal/ventral pattern formation|endocytic vesicle|sensory organ precursor cell fate determination|positive regulation of transcription by RNA polymerase II|c…	-	Notch	N	Essential signaling protein which has a major role in many developmental processes (PubMed:3935325). Functions as a receptor for membrane-bound ligands Delta and Serrate to regulate cell-fate determination (PubMed:10935637, PubMed:15620650, PubMed:12909620, PubMed:18243100). Upon ligand activation, and releasing from the cell membrane, the Notch intracellular domain (NICD) forms a transcriptional…	Belongs to the NOTCH family.	Homomer. Interacts with Su(H) when activated. Interacts with Dx via its ANK repeats. Interacts with Dl via the EGF repeats and the Dl EGF repeats. Interacts with Nedd4 and Su(dx). Interacts with O-fut1; the interaction glycosylates N and transports N to early endosomes. Interacts with Akap200; the interaction stabilizes N/Notch protein levels by preventing Cbl-mediated ubiquitination and subseque…	-
FBgn0038071	371.662	-0.532266	0.155823	-3.41584	0.000635862	0.0255263	Dtg	protein_coding	GO:0016021|GO:0009986|GO:0031982|GO:0007369|GO:0016020	integral component of membrane|cell surface|vesicle|gastrulation|membrane	-	Dpp target gene	Dtg	-	-	-	-
FBgn0265580	10.584	2.26458	0.663244	3.41441	0.00063921	0.0255923	lncRNA:CR44407	ncRNA			-	long non-coding RNA:CR44407	lncRNA:CR44407	-	-	-	-
FBgn0267925	2.92869	4.98228	1.45959	3.41348	0.000641392	0.0256113	lncRNA:CR46206	ncRNA			-	long non-coding RNA:CR46206	lncRNA:CR46206	-	-	-	-
FBgn0011603	665.866	0.329652	0.0966609	3.41039	0.000648698	0.0257084	ine	protein_coding	GO:0016021|GO:0005886|GO:0019226|GO:0006836|GO:0005328|GO:0016323|GO:0005034|GO:0042066|GO:0042065|GO:0009414|GO:0050891|GO:0047484|GO:0016020|GO:0015293|GO:0055085|GO:0007275|GO:0007399|GO:0030154|GO:0016021|GO:0019226|GO:0006836|GO:0005328|GO:0005034|GO:0042065|GO:0016020|GO:0015293|GO:0055085|GO:0016021|GO:0005886|GO:0019226|GO:0006836|GO:0005328|GO:0016323|GO:0005034|GO:0042066|GO:0042065|GO:…	integral component of membrane|plasma membrane|transmission of nerve impulse|neurotransmitter transport|neurotransmitter:sodium symporter activity|basolateral plasma membrane|osmosensor activity|perineurial glial growth|glial cell growth|response to water deprivation|multicellular organismal water homeostasis|regulation of response to osmotic stress|membrane|symporter activity|transmembrane trans…	inebriated (ine) encodes a protein that belongs to the SLC6A family of neurotransmitter transporters. It is involved in the control of photoreceptor potential, perineurial glial growth and the osmotic stress response. It also acts in the peripheral glia to control motor neuron excitability in third instar larvae. [Date last reviewed: 2019-03-07]	inebriated	ine	Plays a role in neuronal membrane excitation, important for normal response properties of the photoreceptor. Able to control excitability from either neurons or glia cells. Ine negatively regulates neuronal sodium channels. Controls neurotransmitter-mediated signaling pathways associated with the structure of the larval peripheral nerve, ine and eag control perineurial glial growth through partia…	Belongs to the sodium:neurotransmitter symporter (SNF) (TC 2.A.22) family.	-	-
FBgn0033710	949.79	0.3042	0.0892062	3.41007	0.000649454	0.0257084	CG17739	protein_coding	GO:0031012|GO:0007155|GO:0004867|GO:0010951|GO:0005576|GO:0030414|GO:0010466	extracellular matrix|cell adhesion|serine-type endopeptidase inhibitor activity|negative regulation of endopeptidase activity|extracellular region|peptidase inhibitor activity|negative regulation of peptidase activity	Insufficient genetic data for FlyBase to solicit a summary. [Date last reviewed: 2016-06-30]	-	CG17739	-	-	-	-
FBgn0264261	51.3191	-0.842133	0.246974	-3.4098	0.000650099	0.0257084	lncRNA:CR43761	ncRNA			-	long non-coding RNA:CR43761	lncRNA:CR43761	-	-	-	-
FBgn0038685	403.812	-0.425772	0.124876	-3.40956	0.000650672	0.0257084	CG14282	protein_coding	GO:0051568|GO:0044666|GO:0048188|GO:0000781|GO:0006348	histone H3-K4 methylation|MLL3/4 complex|Set1C/COMPASS complex|chromosome, telomeric region|chromatin silencing at telomere	Insufficient genetic data for FlyBase to solicit a summary. [Date last reviewed: 2017-07-13]	-	CG14282	-	-	-	-
FBgn0265679	26.6189	-1.23398	0.362014	-3.40864	0.000652866	0.0257274	lncRNA:CR44486	ncRNA			-	long non-coding RNA:CR44486	lncRNA:CR44486	-	-	-	-
FBgn0046302	1569.4	-0.465425	0.136664	-3.40561	0.000660167	0.0258937	CG10650	protein_coding			Insufficient genetic data for FlyBase to solicit a summary. [Date last reviewed: 2016-06-30]	-	CG10650	-	-	-	-
FBgn0030028	89.0038	-1.03954	0.305324	-3.40471	0.000662345	0.0258937	Corp	protein_coding	GO:0002039|GO:1902166|GO:1902230|GO:0002039|GO:1902166|GO:1902230	p53 binding|negative regulation of intrinsic apoptotic signaling pathway in response to DNA damage by p53 class mediator|negative regulation of intrinsic apoptotic signaling pathway in response to DNA damage|p53 binding|negative regulation of intrinsic apoptotic signaling pathway in response to DNA damage by p53 class mediator|negative regulation of intrinsic apoptotic signaling pathway in respon…	Companion of reaper (Corp) is a gene that is transcriptionally induced following DNA damage. It may function to inhibit the pro-apoptotic activity of the transcriptional factor encoded by p53. [Date last reviewed: 2018-10-11]	Companion of reaper	Corp	-	-	-	-
FBgn0264787	114.281	-0.758476	0.222777	-3.40464	0.000662524	0.0258937	lncRNA:CR44017	ncRNA			-	long non-coding RNA:CR44017	lncRNA:CR44017	-	-	-	-
FBgn0267719	3.09698	5.0622	1.48728	3.40366	0.000664899	0.0258937	lncRNA:CR46052	ncRNA			-	long non-coding RNA:CR46052	lncRNA:CR46052	-	-	-	-
FBgn0036170	1387.12	-0.379437	0.111513	-3.40262	0.000667435	0.0258937	CG11714	protein_coding	GO:0005515|GO:0005515|GO:0005515	protein binding|protein binding|protein binding	Insufficient genetic data for FlyBase to solicit a summary. [Date last reviewed: 2016-06-30]	-	CG11714	-	-	-	-
FBgn0285958	1387.12	-0.379437	0.111513	-3.40262	0.000667435	0.0258937	Fuca	protein_coding	GO:0005975|GO:0042742|GO:0007339|GO:0042806|GO:0097524|GO:0004560|GO:0002081|GO:0006004|GO:0006027|GO:0016787|GO:0008152|GO:0016798|GO:0005764|GO:0016139|GO:0005975|GO:0042742|GO:0007339|GO:0042806|GO:0097524|GO:0004560|GO:0002081|GO:0006004|GO:0006027|GO:0016787|GO:0008152|GO:0016798|GO:0005764|GO:0016139	carbohydrate metabolic process|defense response to bacterium|binding of sperm to zona pellucida|fucose binding|sperm plasma membrane|alpha-L-fucosidase activity|outer acrosomal membrane|fucose metabolic process|glycosaminoglycan catabolic process|hydrolase activity|metabolic process|hydrolase activity, acting on glycosyl bonds|lysosome|glycoside catabolic process|carbohydrate metabolic process|de…	Œ±-L-fucosidase (Fuca) encodes an enzyme belonging to the family of hydrolases. It has also been identified as a transmembrane protein in the plasma-membrane of spermatozoa. Its roles include N-glycan degradation, glycan structure degradation, and is potentially involved in fertilization, particularly in initial sperm-egg recognition. [Date last reviewed: 2019-03-28]	alpha-L-fucosidase	Fuca	Alpha-L-fucosidase is responsible for hydrolyzing the alpha-1,6-linked fucose joined to the reducing-end N-acetylglucosamine of the carbohydrate moieties of glycoproteins.	Belongs to the glycosyl hydrolase 29 family.	-	-
FBgn0000615	11347.2	-0.348713	0.102518	-3.40148	0.000670208	0.0259134	exu	protein_coding	GO:0005737|GO:0071011|GO:0000398|GO:0003723|GO:0007283|GO:0000932|GO:0042803|GO:0001700|GO:0007300|GO:0003727|GO:0007317|GO:0045451|GO:0008595|GO:0045450|GO:0090305|GO:0036464|GO:0005515|GO:0007275|GO:0005737|GO:0071011|GO:0000398|GO:0003723|GO:0007283|GO:0000932|GO:0042803|GO:0001700|GO:0007300|GO:0003727|GO:0007317|GO:0045451|GO:0008595|GO:0045450|GO:0090305|GO:0036464|GO:0005515|GO:0007275|GO:…	cytoplasm|precatalytic spliceosome|mRNA splicing, via spliceosome|RNA binding|spermatogenesis|P-body|protein homodimerization activity|embryonic development via the syncytial blastoderm|ovarian nurse cell to oocyte transport|single-stranded RNA binding|regulation of pole plasm oskar mRNA localization|pole plasm oskar mRNA localization|anterior/posterior axis specification, embryo|bicoid mRNA loca…	-	exuperantia	exu	Ensures the proper localization of the mRNA of the bicoid gene to the anterior regions of the oocyte thus playing a fundamental role in the establishment of the polarity of the oocyte. May bind the bcd mRNA.	-	Component of the osk RNP complex, which is composed of at least exuperantia (exu), ypsilon schachtel (yps), aret (bruno), cup, and the mRNA of osk (PubMed:10662770). In the sponge body, forms a ribonucleoprotein complex (RNP) containing at least me31B, exu, yps and the mRNA of osk; interactions with exu and yps are RNA dependent (PubMed:11546740).	-
FBgn0036969	4224.16	0.695334	0.20445	3.401	0.000671395	0.0259134	Spn77Bb	protein_coding	GO:0005615|GO:0032504|GO:0004867|GO:0010951|GO:0016020|GO:0016021|GO:0030414|GO:0010466	extracellular space|multicellular organism reproduction|serine-type endopeptidase inhibitor activity|negative regulation of endopeptidase activity|membrane|integral component of membrane|peptidase inhibitor activity|negative regulation of peptidase activity	Insufficient genetic data for FlyBase to solicit a summary. [Date last reviewed: 2016-06-30]	Serpin 77Bb	Spn77Bb	-	-	-	-
FBgn0037396	112.574	1.06078	0.312336	3.39626	0.000683129	0.026254	CG11459	protein_coding	GO:0006508|GO:0005615|GO:0005764|GO:0004197|GO:0004177|GO:0051603|GO:0008234|GO:0016787|GO:0006955|GO:0006508|GO:0005615|GO:0005764|GO:0004197|GO:0004177|GO:0051603|GO:0008234|GO:0016787|GO:0006955	proteolysis|extracellular space|lysosome|cysteine-type endopeptidase activity|aminopeptidase activity|proteolysis involved in cellular protein catabolic process|cysteine-type peptidase activity|hydrolase activity|immune response|proteolysis|extracellular space|lysosome|cysteine-type endopeptidase activity|aminopeptidase activity|proteolysis involved in cellular protein catabolic process|cysteine-…	Insufficient genetic data for FlyBase to solicit a summary. [Date last reviewed: 2016-06-30]	-	CG11459	-	-	-	-
FBgn0002869	30.484	-1.49649	0.440659	-3.39603	0.000683716	0.026254	MtnB	protein_coding	GO:0046872|GO:0010038|GO:0005507|GO:0055065|GO:0005575|GO:0005515|GO:0046872|GO:0010038|GO:0005507|GO:0055065|GO:0005575|GO:0005515|GO:0046872|GO:0010038|GO:0005507|GO:0055065|GO:0005575|GO:0005515	metal ion binding|response to metal ion|copper ion binding|metal ion homeostasis|cellular_component|protein binding|metal ion binding|response to metal ion|copper ion binding|metal ion homeostasis|cellular_component|protein binding|metal ion binding|response to metal ion|copper ion binding|metal ion homeostasis|cellular_component|protein binding	Metallothionein B (MtnB) encodes one of the five metallothioneins. They are metal-binding polypeptides that coordinate both physiological and xenobiotic metal ions, either for homeostasis or detoxification purposes. The product of MtnB shows a preference towards divalent metal ion binding. [Date last reviewed: 2019-03-14]	Metallothionein B	MtnB	This protein binds cations of several transition elements. Thought to be involved in metal ion homeostasis.	Belongs to the metallothionein superfamily. Type 5 family.	-	-
FBgn0038079	52.4013	0.859063	0.253488	3.38897	0.000701547	0.02687	NijC	protein_coding	GO:0016021|GO:0042246|GO:0007155|GO:0016020|GO:0016021|GO:0042246|GO:0007155|GO:0016020|GO:0016021|GO:0042246|GO:0007155|GO:0016020|GO:0016021|GO:0042246|GO:0007155|GO:0016020|GO:0016021|GO:0042246|GO:0007155|GO:0016020|GO:0016021|GO:0042246|GO:0007155|GO:0016020	integral component of membrane|tissue regeneration|cell adhesion|membrane|integral component of membrane|tissue regeneration|cell adhesion|membrane|integral component of membrane|tissue regeneration|cell adhesion|membrane|integral component of membrane|tissue regeneration|cell adhesion|membrane|integral component of membrane|tissue regeneration|cell adhesion|membrane|integral component of membran…	Insufficient genetic data for FlyBase to solicit a summary. [Date last reviewed: 2016-06-30]	Ninjurin C	NijC	-	-	-	-
FBgn0038838	18.128	1.55808	0.461363	3.37713	0.00073246	0.0279826	TotB	protein_coding	GO:0005576|GO:0005615|GO:0045087|GO:0009617|GO:0009408|GO:0009411|GO:0034644|GO:0034605|GO:0002376|GO:0003674	extracellular region|extracellular space|innate immune response|response to bacterium|response to heat|response to UV|cellular response to UV|cellular response to heat|immune system process|molecular_function	Turandot B (TotB) encodes a protein that belongs to a class of poorly characterized secreted peptides. Some Turandot genes are expressed in response to stress in the fat body by the JAK-STAT pathway. [Date last reviewed: 2019-03-14]	Turandot B	TotB	A humoral factor that may play a role in stress tolerance.	Belongs to the Turandot family.	-	-
FBgn0039474	275.322	-1.83556	0.545061	-3.36762	0.000758197	0.0288923	CG6283	protein_coding	GO:0005615|GO:0016042|GO:0016298|GO:0052689|GO:0006629|GO:0008970|GO:0005575|GO:0016787|GO:0005576|GO:0004806	extracellular space|lipid catabolic process|lipase activity|carboxylic ester hydrolase activity|lipid metabolic process|phospholipase A1 activity|cellular_component|hydrolase activity|extracellular region|triglyceride lipase activity	Insufficient genetic data for FlyBase to solicit a summary. [Date last reviewed: 2016-06-30]	-	CG6283	-	-	-	-
FBgn0083965	617.537	0.445803	0.132469	3.36534	0.000764486	0.0290582	CG34129	protein_coding	GO:0006508|GO:0004252|GO:0005615|GO:0032504|GO:0008236|GO:0003674	proteolysis|serine-type endopeptidase activity|extracellular space|multicellular organism reproduction|serine-type peptidase activity|molecular_function	CG34129 encodes a protein with homology to serine-type endopeptidases, but is not predicted to have catalytic activity due to mutations in its active site. It is produced in the male accessory gland and transferred to females during mating. [Date last reviewed: 2019-03-07]	-	CG34129	-	-	-	-
FBgn0039156	1236.06	0.579681	0.172467	3.36111	0.000776305	0.0294329	CG6178	protein_coding	GO:0055114|GO:0003824|GO:0006633|GO:0005777|GO:0004467|GO:0001676|GO:0015645|GO:0006637|GO:0016405|GO:0004321|GO:0046949|GO:0016740|GO:0016874|GO:0016746	oxidation-reduction process|catalytic activity|fatty acid biosynthetic process|peroxisome|long-chain fatty acid-CoA ligase activity|long-chain fatty acid metabolic process|fatty acid ligase activity|acyl-CoA metabolic process|CoA-ligase activity|fatty-acyl-CoA synthase activity|fatty-acyl-CoA biosynthetic process|transferase activity|ligase activity|transferase activity, transferring acyl groups	-	-	CG6178	-	-	-	-
FBgn0085256	161.09	-0.725297	0.21586	-3.36003	0.000779346	0.0294738	CG34227	protein_coding	GO:0005615	extracellular space	-	-	CG34227	-	-	-	-
FBgn0052656	4838.28	-0.393194	0.11718	-3.35547	0.000792295	0.0298071	Muc11A	protein_coding	GO:0005576|GO:0031012|GO:0008061|GO:0006030|GO:0005201	extracellular region|extracellular matrix|chitin binding|chitin metabolic process|extracellular matrix structural constituent	Insufficient genetic data for FlyBase to solicit a summary. [Date last reviewed: 2016-06-30]	Mucin 11A	Muc11A	-	-	-	-
FBgn0036950	6.57064	-2.80299	0.835427	-3.35516	0.0007932	0.0298071	CG6996	protein_coding	GO:0016021|GO:0005576|GO:0008061|GO:0006030|GO:0016020|GO:0016021|GO:0005576|GO:0008061|GO:0006030|GO:0016020	integral component of membrane|extracellular region|chitin binding|chitin metabolic process|membrane|integral component of membrane|extracellular region|chitin binding|chitin metabolic process|membrane	Insufficient genetic data for FlyBase to solicit a summary. [Date last reviewed: 2016-06-30]	-	CG6996	-	-	-	-
FBgn0011670	3871.31	0.366581	0.109275	3.35466	0.000794622	0.0298071	Mst57Dc	protein_coding	GO:0005576|GO:0005615|GO:0032504|GO:0018991|GO:0045297|GO:0003674|GO:0007610|GO:0045924	extracellular region|extracellular space|multicellular organism reproduction|oviposition|post-mating behavior|molecular_function|behavior|regulation of female receptivity	Male-specific transcript 57Dc (Mst57Dc) encodes a peptide produced by the male accessory glands and transferred to females during mating. [Date last reviewed: 2019-03-14]	Male-specific transcript 57Dc	Mst57Dc	Transferred from male to female during mating and may affect egglaying and behavior after mating.	-	-	-
FBgn0020509	2800.23	0.310559	0.0925894	3.35415	0.000796099	0.0298071	Acp62F	protein_coding	GO:0005615|GO:0032504|GO:0007610|GO:0030414|GO:0030162|GO:0004867|GO:0045861|GO:0046692|GO:0010951|GO:0005576	extracellular space|multicellular organism reproduction|behavior|peptidase inhibitor activity|regulation of proteolysis|serine-type endopeptidase inhibitor activity|negative regulation of proteolysis|sperm competition|negative regulation of endopeptidase activity|extracellular region	Accessory gland protein 62F (Acp62F) encodes a trypsin inhibitor that is synthesized in male accessory glands and transferred to females during mating. It influences sperm storage in mated females. [Date last reviewed: 2019-03-07]	Accessory gland protein 62F	Acp62F	Responsible for physiological and behavioral changes in mated female flies. May contribute to the toxicity of seminal fluid and the decreased life-span of mated females. May also affect neuromuscular events after mating concerning sperm storage and egg release.	-	-	-
FBgn0036015	552.261	-0.508689	0.151777	-3.35156	0.000803584	0.0300125	CG3088	protein_coding	GO:0006508|GO:0004252|GO:0016787	proteolysis|serine-type endopeptidase activity|hydrolase activity	Insufficient genetic data for FlyBase to solicit a summary. [Date last reviewed: 2016-06-30]	-	CG3088	-	-	-	-
FBgn0265268	729.349	0.367249	0.109664	3.34884	0.000811492	0.0302326	CG18234	protein_coding	GO:0005783|GO:0055114|GO:0005506|GO:0016705|GO:0018401|GO:0016702|GO:0004656|GO:0031418|GO:0016491|GO:0003674|GO:0008150|GO:0005575|GO:0046872|GO:0005788|GO:0051213|GO:0005515	endoplasmic reticulum|oxidation-reduction process|iron ion binding|oxidoreductase activity, acting on paired donors, with incorporation or reduction of molecular oxygen|peptidyl-proline hydroxylation to 4-hydroxy-L-proline|oxidoreductase activity, acting on single donors with incorporation of molecular oxygen, incorporation of two atoms of oxygen|procollagen-proline 4-dioxygenase activity|L-ascor…	-	-	CG18234	-	-	-	-
FBgn0028848	3135.54	-0.285741	0.0854146	-3.34534	0.000821823	0.0305417	Gpo3	protein_coding	GO:0055114|GO:0005739|GO:0016491|GO:0009331|GO:0046168|GO:0004367|GO:0052591|GO:0004368|GO:0006072|GO:0052590|GO:0055114|GO:0005739|GO:0016491|GO:0009331|GO:0046168|GO:0004367|GO:0052591|GO:0004368|GO:0006072|GO:0052590	oxidation-reduction process|mitochondrion|oxidoreductase activity|glycerol-3-phosphate dehydrogenase complex|glycerol-3-phosphate catabolic process|glycerol-3-phosphate dehydrogenase [NAD+] activity|sn-glycerol-3-phosphate:ubiquinone-8 oxidoreductase activity|glycerol-3-phosphate dehydrogenase (quinone) activity|glycerol-3-phosphate metabolic process|sn-glycerol-3-phosphate:ubiquinone oxidoreduct…	Insufficient genetic data for FlyBase to solicit a summary. [Date last reviewed: 2016-06-30]	Glycerophosphate oxidase 3	Gpo3	-	-	-	-
FBgn0051910	616.809	-0.366518	0.109639	-3.34296	0.000828894	0.0307284	CG31910	protein_coding	GO:0003674|GO:0008150|GO:0005575	molecular_function|biological_process|cellular_component	Insufficient genetic data for FlyBase to solicit a summary. [Date last reviewed: 2016-06-30]	-	CG31910	-	-	-	-
FBgn0052475	200.947	-0.583133	0.174614	-3.33955	0.000839139	0.0309612	mthl8	protein_coding	GO:0016021|GO:0005886|GO:0008340|GO:0007186|GO:0004930|GO:0042594|GO:0016020|GO:0007165|GO:0016021|GO:0005886|GO:0008340|GO:0007186|GO:0004930|GO:0042594|GO:0016020|GO:0007165	integral component of membrane|plasma membrane|determination of adult lifespan|G protein-coupled receptor signaling pathway|G protein-coupled receptor activity|response to starvation|membrane|signal transduction|integral component of membrane|plasma membrane|determination of adult lifespan|G protein-coupled receptor signaling pathway|G protein-coupled receptor activity|response to starvation|memb…	-	methuselah-like 8	mthl8	-	Belongs to the G-protein coupled receptor 2 family. Mth subfamily.	-	-
FBgn0031248	335.636	0.542204	0.162361	3.3395	0.000839298	0.0309612	CG11912	protein_coding	GO:0006508|GO:0004252|GO:0016787|GO:0008233|GO:0008236	proteolysis|serine-type endopeptidase activity|hydrolase activity|peptidase activity|serine-type peptidase activity	Insufficient genetic data for FlyBase to solicit a summary. [Date last reviewed: 2016-06-30]	-	CG11912	-	-	-	-
FBgn0038756	638.783	0.349546	0.104931	3.3312	0.000864723	0.0317477	CG4783	protein_coding			Insufficient genetic data for FlyBase to solicit a summary. [Date last reviewed: 2016-06-30]	-	CG4783	-	-	-	-
FBgn0085410	129.06	0.548288	0.164594	3.33116	0.000864848	0.0317477	TrissinR	protein_coding	GO:0016021|GO:0007186|GO:0004930|GO:0016020|GO:0007165|GO:0016021|GO:0007186|GO:0004930|GO:0016020|GO:0007165|GO:0016021|GO:0005887|GO:0007186|GO:0004930|GO:0008188|GO:0008528|GO:0016020|GO:0005886|GO:0007165|GO:0007218|GO:0016021|GO:0007186|GO:0004930|GO:0016020|GO:0007165	integral component of membrane|G protein-coupled receptor signaling pathway|G protein-coupled receptor activity|membrane|signal transduction|integral component of membrane|G protein-coupled receptor signaling pathway|G protein-coupled receptor activity|membrane|signal transduction|integral component of membrane|integral component of plasma membrane|G protein-coupled receptor signaling pathway|G p…	-	Trissin receptor	TrissinR	G-protein coupled receptor which is activated by the Trissin peptide in vitro, leading to increased intracellular calcium ion levels.	Belongs to the G-protein coupled receptor 1 family.	-	-
FBgn0263336	206.683	-0.700599	0.210539	-3.32764	0.000875849	0.0320732	lncRNA:CR43417	ncRNA			-	long non-coding RNA:CR43417	lncRNA:CR43417	-	-	-	-
FBgn0035360	796.152	-0.439923	0.132272	-3.32589	0.000881354	0.0321962	CG1246	protein_coding	GO:0016021|GO:0016020|GO:0016021|GO:0016020|GO:0016021|GO:0016020|GO:0016021|GO:0016020	integral component of membrane|membrane|integral component of membrane|membrane|integral component of membrane|membrane|integral component of membrane|membrane	Insufficient genetic data for FlyBase to solicit a summary. [Date last reviewed: 2016-06-30]	-	CG1246	-	-	-	-
FBgn0031954	388.093	-0.400274	0.120481	-3.32231	0.000892743	0.0325331	CG14537	protein_coding	GO:0016021|GO:0016020|GO:0003674|GO:0008150|GO:0005575	integral component of membrane|membrane|molecular_function|biological_process|cellular_component	Insufficient genetic data for FlyBase to solicit a summary. [Date last reviewed: 2016-10-13]	-	CG14537	-	-	-	-
FBgn0032733	58.6624	-0.814678	0.246332	-3.30723	0.000942229	0.0342533	CG15170	protein_coding	GO:0042060|GO:0042060	wound healing|wound healing	Insufficient genetic data for FlyBase to solicit a summary. [Date last reviewed: 2016-06-30]	-	CG15170	-	-	-	-
FBgn0033067	137.473	-0.707159	0.213915	-3.30579	0.000947094	0.034347	CG11211	protein_coding	GO:0030246|GO:0004888|GO:0038023	carbohydrate binding|transmembrane signaling receptor activity|signaling receptor activity	-	-	CG11211	-	-	-	-
FBgn0069354	3547.78	-0.278195	0.0842165	-3.30333	0.000955428	0.0345658	Porin2	protein_coding	GO:0005741|GO:0055085|GO:0005739|GO:0005261|GO:0006839|GO:0006811|GO:0008308|GO:0015288|GO:0098655|GO:0046930|GO:0015698|GO:0098656|GO:0005741|GO:0055085|GO:0005739|GO:0005261|GO:0006839|GO:0006811|GO:0008308|GO:0015288|GO:0098655|GO:0046930|GO:0015698|GO:0098656	mitochondrial outer membrane|transmembrane transport|mitochondrion|cation channel activity|mitochondrial transport|ion transport|voltage-gated anion channel activity|porin activity|cation transmembrane transport|pore complex|inorganic anion transport|anion transmembrane transport|mitochondrial outer membrane|transmembrane transport|mitochondrion|cation channel activity|mitochondrial transport|ion…	Porin2 (Porin2) encodes a protein with voltage-independent cation-selective pore activity that is involved in ion transport. [Date last reviewed: 2019-02-28]	Porin2	Porin2	-	-	-	-
FBgn0000578	526.55	-0.576771	0.175075	-3.29443	0.000986226	0.0354135	ena	protein_coding	GO:0003779|GO:0005737|GO:0005856|GO:0042995|GO:0017124|GO:0005829|GO:0030425|GO:0030424|GO:0005912|GO:0005856|GO:0048813|GO:0007411|GO:0007391|GO:0008258|GO:0007298|GO:0045886|GO:0048749|GO:0007015|GO:0003779|GO:0032956|GO:0051491|GO:0051489|GO:0030036|GO:0007409|GO:0035262|GO:0007390|GO:0008064|GO:0007303|GO:0007010|GO:0010591|GO:0071212|GO:0031252|GO:0030027|GO:0005911|GO:0003382|GO:0007396|GO:…	actin binding|cytoplasm|cytoskeleton|cell projection|SH3 domain binding|cytosol|dendrite|axon|adherens junction|cytoskeleton|dendrite morphogenesis|axon guidance|dorsal closure|head involution|border follicle cell migration|negative regulation of synaptic growth at neuromuscular junction|compound eye development|actin filament organization|actin binding|regulation of actin cytoskeleton organizati…	enabled (ena) encodes the sole Drosophila member of the Ena/VASP family. It acts as a processive actin polymerase, stimulating actin addition at the barbed end. It has roles in both epithelial morphogenesis and CNS pathfinding. [Date last reviewed: 2019-03-07]	enabled	ena	Functions, together with Abl, trio and fra, in a complex signaling network that regulates axon guidance at the CNS midline. Required in part for robo-mediated repulsive axon guidance. May be involved in lamellipodial dynamics.	Belongs to the Ena/VASP family.	Interacts with Abl and Src SH3 domains. Binds, in vitro and in vivo, the cytoplasmic domain of robo. Interacts with Zyx102EF and chic.	-
FBgn0035358	306.662	0.537935	0.163295	3.29426	0.000986818	0.0354135	CG14949	protein_coding	GO:0016020|GO:0016021	membrane|integral component of membrane	Insufficient genetic data for FlyBase to solicit a summary. [Date last reviewed: 2016-06-30]	-	CG14949	-	-	-	-
FBgn0031335	1204.96	-0.321637	0.0976444	-3.29396	0.000987864	0.0354135	CG5565	protein_coding	GO:0016787|GO:0000287|GO:0016311|GO:0016791	hydrolase activity|magnesium ion binding|dephosphorylation|phosphatase activity	Insufficient genetic data for FlyBase to solicit a summary. [Date last reviewed: 2016-06-30]	-	CG5565	-	-	-	-
FBgn0030590	51.3562	-1.42226	0.431796	-3.29384	0.000988295	0.0354135	CG9518	protein_coding	GO:0016021|GO:0034976|GO:0055114|GO:0016491|GO:0050660|GO:0045455|GO:0016614|GO:0016020|GO:0016021|GO:0034976|GO:0055114|GO:0016491|GO:0050660|GO:0045455|GO:0016614|GO:0016020|GO:0016021|GO:0034976|GO:0055114|GO:0016491|GO:0050660|GO:0045455|GO:0016614|GO:0016020	integral component of membrane|response to endoplasmic reticulum stress|oxidation-reduction process|oxidoreductase activity|flavin adenine dinucleotide binding|ecdysteroid metabolic process|oxidoreductase activity, acting on CH-OH group of donors|membrane|integral component of membrane|response to endoplasmic reticulum stress|oxidation-reduction process|oxidoreductase activity|flavin adenine dinu…	Insufficient genetic data for FlyBase to solicit a summary. [Date last reviewed: 2016-06-30]	-	CG9518	-	-	-	-
FBgn0032387	217.744	-0.523092	0.15904	-3.28906	0.00100522	0.0359343	CG16965	protein_coding	GO:0003824|GO:0005975|GO:0004553|GO:0016787|GO:0008152|GO:0016798|GO:0047402	catalytic activity|carbohydrate metabolic process|hydrolase activity, hydrolyzing O-glycosyl compounds|hydrolase activity|metabolic process|hydrolase activity, acting on glycosyl bonds|protein-glucosylgalactosylhydroxylysine glucosidase activity	Insufficient genetic data for FlyBase to solicit a summary. [Date last reviewed: 2016-06-30]	-	CG16965	-	-	-	-
FBgn0034507	22.2954	1.26239	0.384334	3.28461	0.00102122	0.0363938	CG11192	protein_coding	GO:0006508|GO:0004252|GO:0008236|GO:0016787|GO:0008233	proteolysis|serine-type endopeptidase activity|serine-type peptidase activity|hydrolase activity|peptidase activity	Insufficient genetic data for FlyBase to solicit a summary. [Date last reviewed: 2016-06-30]	-	CG11192	-	-	-	-
FBgn0000078	3463.68	-0.845234	0.257368	-3.28414	0.00102292	0.0363938	Amy-d	protein_coding	GO:0003824|GO:0005975|GO:0004556|GO:0103025|GO:0043169|GO:0016787|GO:0046872|GO:0008152|GO:0016798	catalytic activity|carbohydrate metabolic process|alpha-amylase activity|alpha-amylase activity (releasing maltohexaose)|cation binding|hydrolase activity|metal ion binding|metabolic process|hydrolase activity, acting on glycosyl bonds	Amylase distal (Amy-d) encodes one of three amylases encoded in the Drosophila genome. It is a digestive enzyme required for the hydrolysis of dietary starch. [Date last reviewed: 2019-03-07]	Amylase distal	Amy-d	-	Belongs to the glycosyl hydrolase 13 family.	Monomer.	-
FBgn0265052	305.802	0.490507	0.14954	3.28012	0.00103764	0.0367718	St3	protein_coding	GO:0005829|GO:0042742|GO:0006805|GO:0008146|GO:0051923|GO:0016740|GO:0005829|GO:0042742|GO:0006805|GO:0008146|GO:0051923|GO:0016740|GO:0005829|GO:0042742|GO:0006805|GO:0008146|GO:0051923|GO:0016740	cytosol|defense response to bacterium|xenobiotic metabolic process|sulfotransferase activity|sulfation|transferase activity|cytosol|defense response to bacterium|xenobiotic metabolic process|sulfotransferase activity|sulfation|transferase activity|cytosol|defense response to bacterium|xenobiotic metabolic process|sulfotransferase activity|sulfation|transferase activity	Sulfotransferase 3 (St3) encodes an enzyme involved in sulfation, xenobiotic metabolism and the defense response to bacteria. [Date last reviewed: 2019-09-19]	Sulfotransferase 3	St3	-	-	-	-
FBgn0035750	36.5903	-1.0072	0.307114	-3.27957	0.00103965	0.0367718	CG14826	protein_coding	GO:0003674|GO:0008150|GO:0005575|GO:0003674|GO:0008150|GO:0005575	molecular_function|biological_process|cellular_component|molecular_function|biological_process|cellular_component	Insufficient genetic data for FlyBase to solicit a summary. [Date last reviewed: 2016-10-13]	-	CG14826	-	-	-	-
FBgn0034144	13677.5	-0.256732	0.0782904	-3.27923	0.0010409	0.0367718	CG5089	protein_coding			Insufficient genetic data for FlyBase to solicit a summary. [Date last reviewed: 2016-06-30]	-	CG5089	-	-	-	-
FBgn0051091	20.4848	1.67123	0.511184	3.26934	0.00107799	0.037974	CG31091	protein_coding	GO:0016042|GO:0016298|GO:0006629|GO:0044255|GO:0016788|GO:0016787|GO:0016042|GO:0016298|GO:0006629|GO:0044255|GO:0016788|GO:0016787	lipid catabolic process|lipase activity|lipid metabolic process|cellular lipid metabolic process|hydrolase activity, acting on ester bonds|hydrolase activity|lipid catabolic process|lipase activity|lipid metabolic process|cellular lipid metabolic process|hydrolase activity, acting on ester bonds|hydrolase activity	Insufficient genetic data for FlyBase to solicit a summary. [Date last reviewed: 2016-06-30]	-	CG31091	-	-	-	-
FBgn0038083	102.677	-0.737005	0.225472	-3.26873	0.00108032	0.037974	Ugt37A3	protein_coding	GO:0016021|GO:0016758|GO:0008194|GO:0043231|GO:0015020|GO:0016020|GO:0016740|GO:0016757	integral component of membrane|transferase activity, transferring hexosyl groups|UDP-glycosyltransferase activity|intracellular membrane-bounded organelle|glucuronosyltransferase activity|membrane|transferase activity|transferase activity, transferring glycosyl groups	Insufficient genetic data for FlyBase to solicit a summary. [Date last reviewed: 2016-06-30]	UDP-glycosyltransferase family 37 member A3	Ugt37A3	-	-	-	-
FBgn0040993	736.864	0.586075	0.179365	3.26749	0.00108504	0.037974	CG17325	protein_coding			Insufficient genetic data for FlyBase to solicit a summary. [Date last reviewed: 2016-06-30]	-	CG17325	-	-	-	-
FBgn0259201	736.864	0.586075	0.179365	3.26749	0.00108504	0.037974	CG42305	protein_coding			Insufficient genetic data for FlyBase to solicit a summary. [Date last reviewed: 2016-06-30]	-	CG42305	-	-	-	-
FBgn0034566	2205.48	-0.339463	0.103944	-3.26583	0.00109142	0.0381084	CG9313	protein_coding	GO:0008574|GO:0007018|GO:0007605|GO:0003341|GO:0045504|GO:0045503|GO:0036157|GO:0036158|GO:0005515|GO:0016787|GO:0007605|GO:0003341|GO:0036157|GO:0005515|GO:0016787|GO:0007605|GO:0003341|GO:0036157|GO:0005515	ATP-dependent microtubule motor activity, plus-end-directed|microtubule-based movement|sensory perception of sound|cilium movement|dynein heavy chain binding|dynein light chain binding|outer dynein arm|outer dynein arm assembly|protein binding|hydrolase activity|sensory perception of sound|cilium movement|outer dynein arm|protein binding|hydrolase activity|sensory perception of sound|cilium movem…	-	-	CG9313	-	-	-	-
FBgn0267276	76.2011	-0.727291	0.222836	-3.26379	0.00109933	0.0382955	asRNA:CR45712	ncRNA			-	antisense RNA:CR45712	asRNA:CR45712	-	-	-	-
FBgn0037506	1773.56	-0.297347	0.0912125	-3.25994	0.00111436	0.0387293	Mics1	protein_coding	GO:0016021|GO:0016020	integral component of membrane|membrane	Insufficient genetic data for FlyBase to solicit a summary. [Date last reviewed: 2016-06-30]	Mitochondrial morphology and cristae structure 1	Mics1	-	-	-	-
FBgn0262592	286.569	-0.448637	0.137699	-3.2581	0.00112159	0.038825	CG43127	protein_coding	GO:0016021|GO:0016020|GO:0016021|GO:0016020	integral component of membrane|membrane|integral component of membrane|membrane	Insufficient genetic data for FlyBase to solicit a summary. [Date last reviewed: 2016-06-30]	-	CG43127	-	-	-	-
FBgn0267972	1663.17	-0.33531	0.102921	-3.25793	0.00112229	0.038825	Der-1	protein_coding	GO:0016021|GO:0034976|GO:0005789|GO:0016787|GO:0008233|GO:0043065|GO:0030433|GO:0006515|GO:0016020|GO:0005783|GO:0030176|GO:0030968|GO:0051787|GO:1990381|GO:0000839|GO:0005785|GO:0048500|GO:0016021|GO:0034976|GO:0005789|GO:0016787|GO:0008233|GO:0043065|GO:0030433|GO:0006515|GO:0016020|GO:0005783|GO:0030176|GO:0030968|GO:0051787|GO:1990381|GO:0000839|GO:0005785|GO:0048500	integral component of membrane|response to endoplasmic reticulum stress|endoplasmic reticulum membrane|hydrolase activity|peptidase activity|positive regulation of apoptotic process|ubiquitin-dependent ERAD pathway|protein quality control for misfolded or incompletely synthesized proteins|membrane|endoplasmic reticulum|integral component of endoplasmic reticulum membrane|endoplasmic reticulum unf…	Derlin-1 (Der-1) encodes a transmembrane protein in the endoplasmic reticulum (ER) that is required for the retro-translocation of misfolded ER proteins to the cytoplasm for ubiquitin-mediated protein degradation. This process is referred to as "ER-Associated Degradation". [Date last reviewed: 2019-03-07]	Derlin-1	Der-1	May be involved in the degradation process of specific misfolded endoplasmic reticulum (ER) luminal proteins. May also involved in endoplasmic reticulum stress-induced pre-emptive quality control, a mechanism that selectively attenuates the translocation of newly synthesized proteins into the endoplasmic reticulum and reroutes them to the cytosol for proteasomal degradation.	Belongs to the derlin family.	-	-
FBgn0052660	356.956	0.427547	0.131376	3.25438	0.00113639	0.0391657	lncRNA:CR32660	ncRNA			-	long non-coding RNA:CR32660	lncRNA:CR32660	-	-	-	-
FBgn0267363	697.407	-0.377064	0.115872	-3.25414	0.00113735	0.0391657	JYalpha	protein_coding	GO:0016021|GO:0046872|GO:0005524|GO:0005886|GO:0000166|GO:0016787|GO:0015991|GO:0030317|GO:0006813|GO:0006812|GO:1990573|GO:0006883|GO:0030007|GO:0036376|GO:0005391|GO:0008556|GO:0016020|GO:0006811|GO:0010248|GO:1902600	integral component of membrane|metal ion binding|ATP binding|plasma membrane|nucleotide binding|hydrolase activity|GO_0015991|flagellated sperm motility|potassium ion transport|cation transport|potassium ion import across plasma membrane|cellular sodium ion homeostasis|cellular potassium ion homeostasis|sodium ion export across plasma membrane|sodium:potassium-exchanging ATPase activity|potassium…	JYalpha (JYalpha) is a gene essential for male fertility as mutants produce immotile sperm. [Date last reviewed: 2019-03-14]	JYalpha	JYalpha	-	-	-	-
FBgn0020312	217.206	0.441488	0.135811	3.25077	0.00115095	0.0395431	Tmtc3	protein_coding	GO:0016021|GO:0005783|GO:0035269|GO:0000030|GO:0004169|GO:0016020|GO:0016740|GO:0006486|GO:0003674|GO:0008150|GO:0005575|GO:0005515|GO:0016021|GO:0005783|GO:0035269|GO:0000030|GO:0004169|GO:0016020|GO:0016740|GO:0006486|GO:0003674|GO:0008150|GO:0005575|GO:0005515	integral component of membrane|endoplasmic reticulum|protein O-linked mannosylation|mannosyltransferase activity|dolichyl-phosphate-mannose-protein mannosyltransferase activity|membrane|transferase activity|protein glycosylation|molecular_function|biological_process|cellular_component|protein binding|integral component of membrane|endoplasmic reticulum|protein O-linked mannosylation|mannosyltrans…	Insufficient genetic data for FlyBase to solicit a summary. [Date last reviewed: 2016-06-30]	Transmembrane and tetratricopeptide repeat containing 3	Tmtc3	Transfers mannosyl residues to the hydroxyl group of serine or threonine residues.	Belongs to the TMTC family.	-	Protein modification; protein glycosylation.
FBgn0010288	2019.32	-0.295041	0.0908374	-3.24802	0.00116213	0.039836	Uch	protein_coding	GO:0005737|GO:0006511|GO:0004843|GO:0016579|GO:0016787|GO:0008233|GO:0006508|GO:0008234|GO:0036459|GO:0006511|GO:0004843|GO:0008233|GO:0006508|GO:0008234|GO:0036459|GO:0005737|GO:0006511|GO:0004843|GO:0016579|GO:0016787|GO:0008233|GO:0006508|GO:0008234|GO:0036459	cytoplasm|ubiquitin-dependent protein catabolic process|thiol-dependent ubiquitin-specific protease activity|protein deubiquitination|hydrolase activity|peptidase activity|proteolysis|cysteine-type peptidase activity|thiol-dependent ubiquitinyl hydrolase activity|ubiquitin-dependent protein catabolic process|thiol-dependent ubiquitin-specific protease activity|peptidase activity|proteolysis|cyste…	-	Ubiquitin carboxy-terminal hydrolase	Uch	Ubiquitin-protein hydrolase is involved both in the processing of ubiquitin precursors and of ubiquitinated proteins. This enzyme is a thiol protease that recognizes and hydrolyzes a peptide bond at the C-terminal glycine of ubiquitin.	Belongs to the peptidase C12 family.	-	-
FBgn0028491	3701.97	-0.408766	0.126109	-3.24137	0.00118957	0.040684	CG2930	protein_coding	GO:0016021|GO:0055085|GO:0016020|GO:0022857|GO:0035673|GO:0015333|GO:0071916|GO:1904680|GO:0006857|GO:0005887|GO:0035442|GO:0016021|GO:0055085|GO:0016020|GO:0022857|GO:0035673|GO:0015333|GO:0071916|GO:1904680|GO:0006857|GO:0005887|GO:0035442|GO:0016021|GO:0055085|GO:0016020|GO:0022857|GO:0035673|GO:0015333|GO:0071916|GO:1904680|GO:0006857|GO:0005887|GO:0035442|GO:0016021|GO:0055085|GO:0016020|GO:…	integral component of membrane|transmembrane transport|membrane|transmembrane transporter activity|oligopeptide transmembrane transporter activity|peptide:proton symporter activity|dipeptide transmembrane transporter activity|peptide transmembrane transporter activity|oligopeptide transport|integral component of plasma membrane|dipeptide transmembrane transport|integral component of membrane|tran…	Insufficient genetic data for FlyBase to solicit a summary. [Date last reviewed: 2016-06-30]	-	CG2930	-	-	-	-
FBgn0051016	211.508	0.436548	0.134731	3.24015	0.00119468	0.0407657	CG31016	protein_coding	GO:0005783|GO:0055114|GO:0005506|GO:0016705|GO:0032504|GO:0018401|GO:0016702|GO:0004656|GO:0031418|GO:0016491|GO:0046872|GO:0005788|GO:0051213|GO:0019511|GO:0005515|GO:0005783|GO:0055114|GO:0005506|GO:0016705|GO:0032504|GO:0018401|GO:0016702|GO:0004656|GO:0031418|GO:0016491|GO:0046872|GO:0005788|GO:0051213|GO:0005515	endoplasmic reticulum|oxidation-reduction process|iron ion binding|oxidoreductase activity, acting on paired donors, with incorporation or reduction of molecular oxygen|multicellular organism reproduction|peptidyl-proline hydroxylation to 4-hydroxy-L-proline|oxidoreductase activity, acting on single donors with incorporation of molecular oxygen, incorporation of two atoms of oxygen|procollagen-pr…	Insufficient genetic data for FlyBase to solicit a summary. [Date last reviewed: 2016-06-30]	-	CG31016	-	-	-	-
FBgn0033268	7807.89	-0.383251	0.11862	-3.23091	0.00123395	0.0420104	Obp44a	protein_coding	GO:0005576|GO:0007606|GO:0007608|GO:0005549|GO:0005576|GO:0007606|GO:0007608|GO:0005549	extracellular region|sensory perception of chemical stimulus|sensory perception of smell|odorant binding|extracellular region|sensory perception of chemical stimulus|sensory perception of smell|odorant binding	-	Odorant-binding protein 44a	Obp44a	-	-	-	-
FBgn0037260	250.291	0.485476	0.150293	3.23019	0.00123709	0.0420218	Mur82C	protein_coding	GO:0031012|GO:0005201|GO:0070701|GO:0008150	extracellular matrix|extracellular matrix structural constituent|mucus layer|biological_process	-	Mucin related 82C	Mur82C	-	-	-	-
FBgn0035167	10.6083	1.95374	0.605969	3.22415	0.00126345	0.0427885	Gr61a	protein_coding	GO:0016021|GO:0008527|GO:0050912|GO:0016020|GO:0005886|GO:0016021|GO:0005886|GO:0008527|GO:0007165|GO:0050909|GO:0050916|GO:0033041|GO:0050912|GO:0016020|GO:0007606|GO:0001582|GO:0016021|GO:0005886|GO:0008527|GO:0007165|GO:0050909|GO:0050916|GO:0033041|GO:0050912|GO:0016020|GO:0007606|GO:0001582	integral component of membrane|taste receptor activity|detection of chemical stimulus involved in sensory perception of taste|membrane|plasma membrane|integral component of membrane|plasma membrane|taste receptor activity|signal transduction|sensory perception of taste|sensory perception of sweet taste|sweet taste receptor activity|detection of chemical stimulus involved in sensory perception of …	-	Gustatory receptor 61a	Gr61a	One of the few identified sugar gustatory receptors identified so far with glucose being its primary ligand and which mediates acceptance behavior.	Belongs to the insect chemoreceptor superfamily. Gustatory receptor (GR) family. Gr5a subfamily.	-	-
FBgn0053307	338.04	0.42335	0.131323	3.22372	0.00126536	0.0427885	CG33307	protein_coding	GO:0003674|GO:0008150|GO:0005575|GO:0003674|GO:0008150|GO:0005575	molecular_function|biological_process|cellular_component|molecular_function|biological_process|cellular_component	Insufficient genetic data for FlyBase to solicit a summary. [Date last reviewed: 2016-06-30]	-	CG33307	-	-	-	-
FBgn0015872	1056.49	0.391751	0.121579	3.22219	0.00127216	0.0428338	Drip	protein_coding	GO:0016021|GO:0055085|GO:0016020|GO:0015267|GO:0016021|GO:0055085|GO:0016020|GO:0015267|GO:0016021|GO:0005886|GO:0055085|GO:0016020|GO:0046662|GO:0015250|GO:0015267|GO:0003014|GO:0006833|GO:0030104|GO:0016021|GO:0055085|GO:0016020|GO:0015267|GO:0016021|GO:0005886|GO:0055085|GO:0016020|GO:0046662|GO:0015250|GO:0015267|GO:0003014|GO:0006833|GO:0030104|GO:0016021|GO:0055085|GO:0016020|GO:0015267|GO:…	integral component of membrane|transmembrane transport|membrane|channel activity|integral component of membrane|transmembrane transport|membrane|channel activity|integral component of membrane|plasma membrane|transmembrane transport|membrane|regulation of oviposition|water channel activity|channel activity|renal system process|water transport|water homeostasis|integral component of membrane|trans…	Drip (Drip) encodes a protein that belongs to the MIP/aquaporin family involved in the transport of water across the cell membrane. In addition to its cellular roles, it has been implicated in regulating aspects of reproduction and aging. [Date last reviewed: 2019-03-07]	Drip	Drip	Forms a water-specific channel.	Belongs to the MIP/aquaporin (TC 1.A.8) family.	Homotetramer.	-
FBgn0015721	158.425	0.54816	0.170124	3.22213	0.00127241	0.0428338	ktub	protein_coding	GO:0005634|GO:0005737|GO:0043025|GO:0070328|GO:0016028|GO:0006897|GO:0005929|GO:0008289|GO:0007605|GO:0042593|GO:0009744|GO:0016059|GO:0060170|GO:0061512|GO:0016020|GO:0005886|GO:0042995	nucleus|cytoplasm|neuronal cell body|triglyceride homeostasis|rhabdomere|endocytosis|cilium|lipid binding|sensory perception of sound|glucose homeostasis|response to sucrose|deactivation of rhodopsin mediated signaling|ciliary membrane|protein localization to cilium|membrane|plasma membrane|cell projection	king tubby (ktub) encodes a protein that belongs to the tubby and tubby-like protein family. It functions in endocytosis of the rhodopsin encoded by ninaE, retinal degeneration upon light stimulation, and the localization of channel encoded by the channel encoded by trp in cilia. [Date last reviewed: 2019-03-14]	king tubby	ktub	Functions in regulating protein trafficking, retinal maintenance and lipid storage (PubMed:23228091, PubMed:23355467, PubMed:24068974, PubMed:26723017). Protects photoreceptor cells R1 to R6 against light-induced retinal degeneration by stimulating norpA-mediated endocytosis of the rhodopsin ninaE (Rh1) (PubMed:23228091). In the auditory receptor neurons, functions as a cilia trafficking regulato…	Belongs to the TUB family.	-	-
FBgn0263997	149.65	0.553114	0.171716	3.22109	0.00127703	0.0428932	CG43740	protein_coding	GO:0016021|GO:0005654|GO:0016020|GO:0003674|GO:0016021|GO:0005654|GO:0016020|GO:0003674|GO:0016021|GO:0005654|GO:0016020|GO:0003674	integral component of membrane|nucleoplasm|membrane|molecular_function|integral component of membrane|nucleoplasm|membrane|molecular_function|integral component of membrane|nucleoplasm|membrane|molecular_function	Insufficient genetic data for FlyBase to solicit a summary. [Date last reviewed: 2016-06-30]	-	CG43740	-	-	-	-
FBgn0040629	92.3301	-0.642664	0.199695	-3.21823	0.00128985	0.0432271	CAH5	protein_coding	GO:0008270|GO:0004089|GO:0005886|GO:0046872|GO:0016829|GO:0006730|GO:0016836	zinc ion binding|carbonate dehydratase activity|plasma membrane|metal ion binding|lyase activity|one-carbon metabolic process|hydro-lyase activity	Insufficient genetic data for FlyBase to solicit a summary. [Date last reviewed: 2016-06-30]	Carbonic anhydrase 5	CAH5	-	-	-	-
FBgn0035665	20658.6	-0.26263	0.0817689	-3.21185	0.00131883	0.0440182	Jon65Aiii	protein_coding	GO:0004175|GO:0006508|GO:0004252|GO:0016787|GO:0008233|GO:0008236	endopeptidase activity|proteolysis|serine-type endopeptidase activity|hydrolase activity|peptidase activity|serine-type peptidase activity	Insufficient genetic data for FlyBase to solicit a summary. [Date last reviewed: 2016-06-30]	Jonah 65Aiii	Jon65Aiii	-	-	-	-
FBgn0029753	2147.11	-0.298737	0.093014	-3.21175	0.00131931	0.0440182	CG4198	protein_coding			Insufficient genetic data for FlyBase to solicit a summary. [Date last reviewed: 2016-06-30]	-	CG4198	-	-	-	-
FBgn0031345	318.074	0.402297	0.125337	3.20973	0.00132858	0.0441119	CG18132	protein_coding	GO:0005623|GO:0045454|GO:0043277	cell|cell redox homeostasis|apoptotic cell clearance	Insufficient genetic data for FlyBase to solicit a summary. [Date last reviewed: 2016-06-30]	-	CG18132	-	-	-	-
FBgn0026872	600.506	0.332549	0.103611	3.20959	0.00132924	0.0441119	CG14777	protein_coding	GO:0016021|GO:0005737|GO:0016020|GO:0016021|GO:0005737|GO:0016020|GO:0016021|GO:0005737|GO:0016020|GO:0016021|GO:0005737|GO:0016020|GO:0016021|GO:0005737|GO:0016020	integral component of membrane|cytoplasm|membrane|integral component of membrane|cytoplasm|membrane|integral component of membrane|cytoplasm|membrane|integral component of membrane|cytoplasm|membrane|integral component of membrane|cytoplasm|membrane	Insufficient genetic data for FlyBase to solicit a summary. [Date last reviewed: 2016-06-30]	-	CG14777	-	-	-	-
FBgn0264794	137.977	0.582365	0.181466	3.20922	0.00133094	0.0441119	lncRNA:CR44024	ncRNA			-	long non-coding RNA:CR44024	lncRNA:CR44024	-	-	-	-
FBgn0030242	704.466	-0.355119	0.110819	-3.20449	0.00135301	0.0447447	sofe	protein_coding	GO:0008017|GO:0007186|GO:0000226|GO:0005737|GO:0005819|GO:1990023|GO:0000281|GO:0051256|GO:0008017|GO:0007186|GO:0000226|GO:0005737|GO:0005819|GO:1990023|GO:0000281|GO:0051256	microtubule binding|G protein-coupled receptor signaling pathway|microtubule cytoskeleton organization|cytoplasm|spindle|mitotic spindle midzone|mitotic cytokinesis|mitotic spindle midzone assembly|microtubule binding|G protein-coupled receptor signaling pathway|microtubule cytoskeleton organization|cytoplasm|spindle|mitotic spindle midzone|mitotic cytokinesis|mitotic spindle midzone assembly	-	sister of feo	sofe	-	-	-	-
FBgn0261853	871.323	-0.590979	0.18489	-3.19638	0.00139162	0.0459206	CG42782	protein_coding	GO:0003674|GO:0008150|GO:0005575|GO:0003674|GO:0008150|GO:0005575	molecular_function|biological_process|cellular_component|molecular_function|biological_process|cellular_component	Insufficient genetic data for FlyBase to solicit a summary. [Date last reviewed: 2016-10-13]	-	CG42782	-	-	-	-
FBgn0034866	42.318	0.923608	0.289018	3.19567	0.00139506	0.0459329	Or59c	protein_coding	GO:0016021|GO:0005886|GO:0007165|GO:0032590|GO:0016020|GO:0007608|GO:0005549|GO:0050911|GO:0004984|GO:0050896	integral component of membrane|plasma membrane|signal transduction|dendrite membrane|membrane|sensory perception of smell|odorant binding|detection of chemical stimulus involved in sensory perception of smell|olfactory receptor activity|response to stimulus	Insufficient genetic data for FlyBase to solicit a summary. [Date last reviewed: 2016-06-30]	Odorant receptor 59c	Or59c	Odorant receptor which mediates acceptance or avoidance behavior, depending on its substrates. The odorant receptor repertoire encodes a large collection of odor stimuli that vary widely in identity, intensity, and duration. May form a complex with Orco to form odorant-sensing units, providing sensitive and prolonged odorant signaling and calcium permeability (By similarity).	Belongs to the insect chemoreceptor superfamily. Heteromeric odorant receptor channel (TC 1.A.69) family. Or2a subfamily.	Interacts with Orco. Complexes exist early in the endomembrane system in olfactory sensory neurons (OSNs), coupling these complexes to the conserved ciliary trafficking pathway (By similarity).	-
FBgn0032693	45.058	-0.878111	0.274914	-3.19412	0.00140256	0.0460789	Cyp310a1	protein_coding	GO:0055114|GO:0005506|GO:0005789|GO:0020037|GO:0016705|GO:0004497|GO:0016020|GO:0046872|GO:0005783|GO:0016491|GO:0031090|GO:0043231	oxidation-reduction process|iron ion binding|endoplasmic reticulum membrane|heme binding|oxidoreductase activity, acting on paired donors, with incorporation or reduction of molecular oxygen|monooxygenase activity|membrane|metal ion binding|endoplasmic reticulum|oxidoreductase activity|organelle membrane|intracellular membrane-bounded organelle	Insufficient genetic data for FlyBase to solicit a summary. [Date last reviewed: 2016-06-30]	Cyp310a1	Cyp310a1	May be involved in the metabolism of insect hormones and in the breakdown of synthetic insecticides.	Belongs to the cytochrome P450 family.	-	-
FBgn0262588	19.7083	1.41967	0.444628	3.19293	0.00140835	0.0461681	CG43125	protein_coding	GO:0006508|GO:0004252|GO:0016787|GO:0003674|GO:0008150|GO:0005575	proteolysis|serine-type endopeptidase activity|hydrolase activity|molecular_function|biological_process|cellular_component	-	-	CG43125	-	-	-	-
FBgn0051806	687.497	-0.302721	0.0950495	-3.18488	0.00144814	0.0473136	CG31806	protein_coding	GO:0003674|GO:0008150|GO:0005575|GO:0003674|GO:0008150|GO:0005575	molecular_function|biological_process|cellular_component|molecular_function|biological_process|cellular_component	Insufficient genetic data for FlyBase to solicit a summary. [Date last reviewed: 2016-10-13]	-	CG31806	-	-	-	-
FBgn0029859	1183.39	-0.283543	0.0890361	-3.18459	0.0014496	0.0473136	CG15892	protein_coding	GO:0003674|GO:0008150|GO:0005575	molecular_function|biological_process|cellular_component	Insufficient genetic data for FlyBase to solicit a summary. [Date last reviewed: 2016-06-30]	-	CG15892	-	-	-	-
FBgn0265053	112.196	0.58656	0.184338	3.18198	0.00146271	0.0476379	asRNA:CR44168	ncRNA			-	antisense RNA:CR44168	asRNA:CR44168	-	-	-	-
FBgn0035160	64.6606	0.744161	0.234005	3.18011	0.00147219	0.0478431	hng3	protein_coding	GO:0003677|GO:0005634|GO:0003700|GO:0006355|GO:0001099|GO:0003713|GO:1903508|GO:0003677|GO:0005634|GO:0003700|GO:0006355|GO:0001099|GO:0003713|GO:1903508	DNA binding|nucleus|DNA-binding transcription factor activity|regulation of transcription, DNA-templated|basal RNA polymerase II transcription machinery binding|transcription coactivator activity|positive regulation of nucleic acid-templated transcription|DNA binding|nucleus|DNA-binding transcription factor activity|regulation of transcription, DNA-templated|basal RNA polymerase II transcription …	Insufficient genetic data for FlyBase to solicit a summary. [Date last reviewed: 2016-06-30]	hinge3	hng3	-	-	-	-
FBgn0266957	134.114	-0.610436	0.192229	-3.17556	0.00149548	0.0484948	lncRNA:CR45408	ncRNA			-	long non-coding RNA:CR45408	lncRNA:CR45408	-	-	-	-
FBgn0036479	222.344	-0.491205	0.154726	-3.17467	0.00150009	0.0485394	CG13458	protein_coding	GO:0031314|GO:0045182|GO:0070131	extrinsic component of mitochondrial inner membrane|translation regulator activity|positive regulation of mitochondrial translation	Insufficient genetic data for FlyBase to solicit a summary. [Date last reviewed: 2016-06-30]	-	CG13458	-	-	-	-
FBgn0029659	2719.71	-0.257193	0.0810794	-3.17211	0.00151334	0.0488145	CG16782	protein_coding	GO:0016021|GO:0016020	integral component of membrane|membrane	Insufficient genetic data for FlyBase to solicit a summary. [Date last reviewed: 2017-07-13]	-	CG16782	-	-	-	-
FBgn0036925	1982.1	-0.269399	0.0849362	-3.17178	0.00151509	0.0488145	schuy	protein_coding	GO:0003674|GO:0008150|GO:0005575	molecular_function|biological_process|cellular_component	Insufficient genetic data for FlyBase to solicit a summary. [Date last reviewed: 2016-06-30]	schumacher-levy	schuy	-	-	-	-
FBgn0051233	3571.21	-0.459747	0.145158	-3.16722	0.00153906	0.0493444	CG31233	protein_coding	GO:0005737|GO:0006508|GO:0008270|GO:0070006|GO:0043171|GO:0042277|GO:0008237|GO:0016787|GO:0046872|GO:0004177|GO:0008233|GO:0005737|GO:0006508|GO:0008270|GO:0070006|GO:0043171|GO:0042277|GO:0008237|GO:0016787|GO:0046872|GO:0004177|GO:0008233	cytoplasm|proteolysis|zinc ion binding|metalloaminopeptidase activity|peptide catabolic process|peptide binding|metallopeptidase activity|hydrolase activity|metal ion binding|aminopeptidase activity|peptidase activity|cytoplasm|proteolysis|zinc ion binding|metalloaminopeptidase activity|peptide catabolic process|peptide binding|metallopeptidase activity|hydrolase activity|metal ion binding|aminop…	Insufficient genetic data for FlyBase to solicit a summary. [Date last reviewed: 2016-06-30]	-	CG31233	-	-	-	-
FBgn0050362	1991.3	-0.280025	0.0884155	-3.16715	0.00153941	0.0493444	boly	protein_coding	GO:0003674|GO:0008150|GO:0005575	molecular_function|biological_process|cellular_component	Insufficient genetic data for FlyBase to solicit a summary. [Date last reviewed: 2016-06-30]	borrelly	boly	-	-	-	-
FBgn0032424	1495.26	-0.291686	0.0921179	-3.16644	0.0015432	0.0493444	CG17010	protein_coding	GO:0005634|GO:0046872|GO:0005737|GO:0005524|GO:0046835|GO:0016301|GO:0006014|GO:0019303|GO:0004747|GO:0000166|GO:0016740|GO:0016310|GO:0005975	nucleus|metal ion binding|cytoplasm|ATP binding|carbohydrate phosphorylation|kinase activity|D-ribose metabolic process|D-ribose catabolic process|ribokinase activity|nucleotide binding|transferase activity|phosphorylation|carbohydrate metabolic process	Insufficient genetic data for FlyBase to solicit a summary. [Date last reviewed: 2016-06-30]	-	CG17010	-	-	-	-
FBgn0259998	2675.5	-0.493619	0.155908	-3.16608	0.00154506	0.0493444	CG17571	protein_coding	GO:0006508|GO:0004252|GO:0008236|GO:0016787|GO:0008233|GO:0006508|GO:0004252|GO:0008236|GO:0016787|GO:0008233	proteolysis|serine-type endopeptidase activity|serine-type peptidase activity|hydrolase activity|peptidase activity|proteolysis|serine-type endopeptidase activity|serine-type peptidase activity|hydrolase activity|peptidase activity	Insufficient genetic data for FlyBase to solicit a summary. [Date last reviewed: 2016-06-30]	-	CG17571	-	-	-	-
FBgn0266824	104.3	-0.578992	0.182925	-3.16519	0.00154979	0.0493444	lncRNA:CR45286	ncRNA			-	long non-coding RNA:CR45286	lncRNA:CR45286	-	-	-	-
FBgn0000045	32091.8	0.380888	0.120347	3.16492	0.00155126	0.0493444	Act79B	protein_coding	GO:0005737|GO:0005524|GO:0005856|GO:0000281|GO:0015629|GO:0005200|GO:0005884|GO:0007010|GO:0000166|GO:0005737|GO:0005524|GO:0005856|GO:0000281|GO:0015629|GO:0005200|GO:0005884|GO:0007010|GO:0000166	cytoplasm|ATP binding|cytoskeleton|mitotic cytokinesis|actin cytoskeleton|structural constituent of cytoskeleton|actin filament|cytoskeleton organization|nucleotide binding|cytoplasm|ATP binding|cytoskeleton|mitotic cytokinesis|actin cytoskeleton|structural constituent of cytoskeleton|actin filament|cytoskeleton organization|nucleotide binding	-	Actin 79B	Act79B	Actins are highly conserved proteins that are involved in various types of cell motility and are ubiquitously expressed in all eukaryotic cells. Multiple isoforms are involved in various cellular functions such as cytoskeleton structure, cell mobility, chromosome movement and muscle contraction.	Belongs to the actin family.	-	-
FBgn0035171	192.846	0.502	0.158662	3.16396	0.00155637	0.0494023	CG12502	protein_coding	GO:0016021|GO:0016020|GO:0003674|GO:0008150|GO:0005575|GO:0016021|GO:0016020|GO:0003674|GO:0008150|GO:0005575|GO:0016021|GO:0016020|GO:0003674|GO:0008150|GO:0005575	integral component of membrane|membrane|molecular_function|biological_process|cellular_component|integral component of membrane|membrane|molecular_function|biological_process|cellular_component|integral component of membrane|membrane|molecular_function|biological_process|cellular_component	Insufficient genetic data for FlyBase to solicit a summary. [Date last reviewed: 2016-10-13]	-	CG12502	-	-	-	-
FBgn0038321	1208.94	-0.297512	0.0940646	-3.16285	0.00156233	0.0494749	CG6218	protein_coding	GO:0046835|GO:0070062|GO:0045127|GO:0016740|GO:0046835|GO:0070062|GO:0045127|GO:0016740	carbohydrate phosphorylation|extracellular exosome|N-acetylglucosamine kinase activity|transferase activity|carbohydrate phosphorylation|extracellular exosome|N-acetylglucosamine kinase activity|transferase activity	-	-	CG6218	-	-	-	-
FBgn0003162	1616	0.334975	0.105933	3.16213	0.0015662	0.0494749	Pu	protein_coding	GO:0005737|GO:0008270|GO:0005525|GO:0048067|GO:0048072|GO:0008363|GO:0009880|GO:0006729|GO:0035185|GO:2000274|GO:0046654|GO:0006728|GO:0060308|GO:0035998|GO:0043095|GO:0003934|GO:0000166|GO:0016787|GO:0046872|GO:0003824|GO:0008152|GO:0046654|GO:0003934|GO:0016787|GO:0003824|GO:0008152|GO:0006729|GO:0035998|GO:0046654|GO:0003934|GO:0016787|GO:0003824|GO:0008152|GO:0006729|GO:0035998	cytoplasm|zinc ion binding|GTP binding|cuticle pigmentation|compound eye pigmentation|larval chitin-based cuticle development|embryonic pattern specification|tetrahydrobiopterin biosynthetic process|preblastoderm mitotic cell cycle|regulation of epithelial cell migration, open tracheal system|tetrahydrofolate biosynthetic process|pteridine biosynthetic process|GTP cyclohydrolase I regulator activ…	-	Punch	Pu	Isoform B is required for eye pigment production, Isoform C may be required for normal embryonic development and segment pattern formation.	Belongs to the GTP cyclohydrolase I family.	Toroid-shaped homodecamer, composed of two pentamers of five dimers.	Cofactor biosynthesis; 7,8-dihydroneopterin triphosphate biosynthesis; 7,8-dihydroneopterin triphosphate from GTP: step 1/1.
FBgn0010424	712.739	0.382351	0.120932	3.16169	0.00156854	0.0494749	TpnC73F	protein_coding	GO:0005509|GO:0019722|GO:0046872|GO:0000226|GO:0050790|GO:0030234|GO:0005509|GO:0019722|GO:0046872|GO:0000226|GO:0050790|GO:0030234	calcium ion binding|calcium-mediated signaling|metal ion binding|microtubule cytoskeleton organization|regulation of catalytic activity|enzyme regulator activity|calcium ion binding|calcium-mediated signaling|metal ion binding|microtubule cytoskeleton organization|regulation of catalytic activity|enzyme regulator activity	Insufficient genetic data for FlyBase to solicit a summary. [Date last reviewed: 2016-06-30]	Troponin C at 73F	TpnC73F	-	Belongs to the troponin C family.	-	-
FBgn0032210	1659.2	-0.282745	0.0895792	-3.15637	0.00159744	0.050281	CYLD	protein_coding	GO:0005829|GO:0008340|GO:0042742|GO:0004843|GO:0016579|GO:0006979|GO:0036459|GO:0031098|GO:0061578|GO:0045088|GO:0070536|GO:1990108|GO:0055090|GO:0061815|GO:0005815|GO:0061060|GO:0048471|GO:0005829|GO:0008340|GO:0042742|GO:0004843|GO:0016579|GO:0006979|GO:0036459|GO:0031098|GO:0061578|GO:0045088|GO:0070536|GO:1990108|GO:0055090|GO:0061815|GO:0005815|GO:0048471|GO:0005829|GO:0008340|GO:0042742|GO:…	cytosol|determination of adult lifespan|defense response to bacterium|thiol-dependent ubiquitin-specific protease activity|protein deubiquitination|response to oxidative stress|thiol-dependent ubiquitinyl hydrolase activity|stress-activated protein kinase signaling cascade|Lys63-specific deubiquitinase activity|regulation of innate immune response|protein K63-linked deubiquitination|protein linea…	-	Cylindromatosis	CYLD	-	-	-	-
FBgn0040608	306.291	-0.405057	0.128368	-3.15545	0.00160252	0.0503353	CG14246	protein_coding	GO:0003674|GO:0008150|GO:0005575|GO:0003674|GO:0008150|GO:0005575|GO:0003674|GO:0008150|GO:0005575	molecular_function|biological_process|cellular_component|molecular_function|biological_process|cellular_component|molecular_function|biological_process|cellular_component	Insufficient genetic data for FlyBase to solicit a summary. [Date last reviewed: 2016-06-30]	-	CG14246	-	-	-	-
FBgn0083966	514.624	0.348544	0.110574	3.15213	0.00162085	0.050787	CG34130	protein_coding	GO:0006508|GO:0004252|GO:0005615|GO:0032504|GO:0008236|GO:0003674	proteolysis|serine-type endopeptidase activity|extracellular space|multicellular organism reproduction|serine-type peptidase activity|molecular_function	Insufficient genetic data for FlyBase to solicit a summary. [Date last reviewed: 2016-06-30]	-	CG34130	-	-	-	-
FBgn0265062	56.5474	-0.893947	0.283679	-3.15126	0.00162569	0.050787	lncRNA:CR44173	ncRNA			-	long non-coding RNA:CR44173	lncRNA:CR44173	-	-	-	-
FBgn0035620	346.731	0.529595	0.168071	3.15101	0.00162705	0.050787	Alp9	protein_coding	GO:0009986|GO:0003824|GO:0016311|GO:0016791|GO:0004035|GO:0016787|GO:0009986|GO:0003824|GO:0016311|GO:0016791|GO:0004035|GO:0016787	cell surface|catalytic activity|dephosphorylation|phosphatase activity|alkaline phosphatase activity|hydrolase activity|cell surface|catalytic activity|dephosphorylation|phosphatase activity|alkaline phosphatase activity|hydrolase activity	-	Alkaline phosphatase 9	Alp9	-	-	-	-
FBgn0039644	562.844	0.379079	0.120359	3.14957	0.00163509	0.050932	rdog	protein_coding	GO:0016021|GO:0005524|GO:0016887|GO:0055085|GO:0042626|GO:0016020|GO:0000166|GO:0016787|GO:0016021|GO:0005524|GO:0016887|GO:0055085|GO:0042626|GO:0016020|GO:0000166|GO:0016787	integral component of membrane|ATP binding|ATPase activity|transmembrane transport|ATPase-coupled transmembrane transporter activity|membrane|nucleotide binding|hydrolase activity|integral component of membrane|ATP binding|ATPase activity|transmembrane transport|ATPase-coupled transmembrane transporter activity|membrane|nucleotide binding|hydrolase activity	-	red dog mine	rdog	-	-	-	-
FBgn0036377	52.083	0.866503	0.275249	3.14807	0.00164351	0.0510883	CG10710	protein_coding			Insufficient genetic data for FlyBase to solicit a summary. [Date last reviewed: 2016-06-30]	-	CG10710	-	-	-	-
FBgn0262679	48.9302	0.838126	0.266539	3.14447	0.00166387	0.0516143	CG43149	protein_coding	GO:0003674|GO:0008150|GO:0005575	molecular_function|biological_process|cellular_component	Insufficient genetic data for FlyBase to solicit a summary. [Date last reviewed: 2016-10-13]	-	CG43149	-	-	-	-
FBgn0032055	8587.26	0.351425	0.111878	3.14116	0.00168282	0.0520947	Sgp	protein_coding	GO:0016021|GO:0005777|GO:0006629|GO:0080019|GO:0010025|GO:0035336|GO:0102965|GO:0016020|GO:0016491|GO:0055114|GO:0043231|GO:0016021|GO:0005777|GO:0006629|GO:0080019|GO:0010025|GO:0035336|GO:0102965|GO:0016020|GO:0016491|GO:0055114|GO:0043231	integral component of membrane|peroxisome|lipid metabolic process|fatty-acyl-CoA reductase (alcohol-forming) activity|wax biosynthetic process|long-chain fatty-acyl-CoA metabolic process|alcohol-forming fatty acyl-CoA reductase activity|membrane|oxidoreductase activity|oxidation-reduction process|intracellular membrane-bounded organelle|integral component of membrane|peroxisome|lipid metabolic pr…	Insufficient genetic data for FlyBase to solicit a summary. [Date last reviewed: 2016-06-30]	Sgroppino	Sgp	-	-	-	-
FBgn0265594	2.46589	4.72991	1.50608	3.14055	0.00168632	0.0520954	lncRNA:CR44421	ncRNA			-	long non-coding RNA:CR44421	lncRNA:CR44421	-	-	-	-
FBgn0034295	6554.51	-0.402986	0.128426	-3.13787	0.00170181	0.052466	CG10911	protein_coding	GO:0003674|GO:0008150|GO:0005575	molecular_function|biological_process|cellular_component	Insufficient genetic data for FlyBase to solicit a summary. [Date last reviewed: 2016-06-30]	-	CG10911	-	-	-	-
FBgn0263846	480.731	0.448001	0.142807	3.13711	0.00170621	0.0524812	CG43707	protein_coding	GO:0005515|GO:0005515|GO:0005515|GO:0005515|GO:0005515|GO:0005515|GO:0030018|GO:0005515	protein binding|protein binding|protein binding|protein binding|protein binding|protein binding|Z disc|protein binding	Insufficient genetic data for FlyBase to solicit a summary. [Date last reviewed: 2016-06-30]	-	CG43707	-	-	-	-
FBgn0028422	72.4848	0.773739	0.246682	3.13658	0.00170929	0.0524812	GluRIID	protein_coding	GO:0005886|GO:0016020|GO:0045211|GO:0038023|GO:0007274|GO:0030054|GO:0050804|GO:0015276|GO:0006816|GO:0005216|GO:0004970|GO:0006811|GO:0097482|GO:0015277|GO:0022849|GO:0008066|GO:0035249|GO:1904315|GO:0008328|GO:0043179|GO:0016021|GO:0034220|GO:0035235|GO:0045202|GO:0060078|GO:0019722	plasma membrane|membrane|postsynaptic membrane|signaling receptor activity|neuromuscular synaptic transmission|cell junction|modulation of chemical synaptic transmission|ligand-gated ion channel activity|calcium ion transport|ion channel activity|ionotropic glutamate receptor activity|ion transport|muscle cell postsynaptic specialization|kainate selective glutamate receptor activity|glutamate-gat…	Glutamate receptor IID (GluRIID) encodes a subunit of the muscle glutamate receptor that responds to neurotransmitter at the neuromuscular junction. [Date last reviewed: 2019-09-12]	Glutamate receptor IID	GluRIID	-	-	-	-
FBgn0037995	1494.94	-0.2878	0.0917971	-3.13517	0.00171754	0.0525907	CG3809	protein_coding	GO:0006166|GO:0004001|GO:0006167|GO:0003674|GO:0008150|GO:0005575|GO:0005634|GO:0016301|GO:0016740|GO:0016310|GO:0005829|GO:0044209	purine ribonucleoside salvage|adenosine kinase activity|AMP biosynthetic process|molecular_function|biological_process|cellular_component|nucleus|kinase activity|transferase activity|phosphorylation|cytosol|AMP salvage	Insufficient genetic data for FlyBase to solicit a summary. [Date last reviewed: 2016-06-30]	-	CG3809	-	-	-	-
FBgn0039783	741.704	0.359222	0.114593	3.13477	0.00171986	0.0525907	PH4alphaNE2	protein_coding	GO:0005783|GO:0055114|GO:0005506|GO:0016477|GO:0016705|GO:0005615|GO:0032504|GO:0018401|GO:0016702|GO:0004656|GO:0031418|GO:0016491|GO:0046872|GO:0005788|GO:0051213|GO:0019511|GO:0005515	endoplasmic reticulum|oxidation-reduction process|iron ion binding|cell migration|oxidoreductase activity, acting on paired donors, with incorporation or reduction of molecular oxygen|extracellular space|multicellular organism reproduction|peptidyl-proline hydroxylation to 4-hydroxy-L-proline|oxidoreductase activity, acting on single donors with incorporation of molecular oxygen, incorporation of…	Insufficient genetic data for FlyBase to solicit a summary. [Date last reviewed: 2016-06-30]	prolyl-4-hydroxylase-alpha NE2	PH4alphaNE2	-	-	-	-
FBgn0026593	475.784	0.379974	0.121307	3.13234	0.00173419	0.0529211	CG5707	protein_coding	GO:0003674|GO:0008150|GO:0005575|GO:0016787|GO:0003674|GO:0008150|GO:0005575|GO:0016787|GO:0003674|GO:0008150|GO:0005575|GO:0016787	molecular_function|biological_process|cellular_component|hydrolase activity|molecular_function|biological_process|cellular_component|hydrolase activity|molecular_function|biological_process|cellular_component|hydrolase activity	Insufficient genetic data for FlyBase to solicit a summary. [Date last reviewed: 2016-06-30]	-	CG5707	-	-	-	-
FBgn0266084	6734.72	-0.459908	0.146856	-3.1317	0.00173798	0.0529292	Fhos	protein_coding	GO:0005634|GO:0005737|GO:0048471|GO:0007476|GO:0035070|GO:0003779|GO:0046716|GO:0060439|GO:0003012|GO:0010623|GO:0051496|GO:0030335|GO:1900026|GO:0044319|GO:0005856|GO:0051015|GO:0030866|GO:0051639|GO:0005634|GO:0005737|GO:0048471|GO:0007476|GO:0035070|GO:0003779|GO:0046716|GO:0060439|GO:0003012|GO:0010623|GO:0051496|GO:0030335|GO:1900026|GO:0044319|GO:0005856|GO:0051015|GO:0030866|GO:0051639|GO:…	nucleus|cytoplasm|perinuclear region of cytoplasm|imaginal disc-derived wing morphogenesis|salivary gland histolysis|actin binding|muscle cell cellular homeostasis|trachea morphogenesis|muscle system process|programmed cell death involved in cell development|positive regulation of stress fiber assembly|positive regulation of cell migration|positive regulation of substrate adhesion-dependent cell …	Formin homology 2 domain containing (Fhos) encodes a protein that regulates actin-dependent remodeling of muscle cytoskeleton via induction of actin stress fibers, directs macrophage migration during cellular immune response, and is involved in autophagic programmed cell death. [Date last reviewed: 2019-03-07]	Formin homology 2 domain containing	Fhos	-	-	-	-
FBgn0085479	820.713	-0.292165	0.0934853	-3.12525	0.00177652	0.0539933	CG34450	protein_coding	GO:0016021|GO:0016020|GO:0003674|GO:0008150|GO:0005575	integral component of membrane|membrane|molecular_function|biological_process|cellular_component	Insufficient genetic data for FlyBase to solicit a summary. [Date last reviewed: 2017-07-13]	-	CG34450	-	-	-	-
FBgn0002567	1300.55	0.286336	0.0916469	3.12434	0.00178204	0.0540517	Rab32	protein_coding	GO:0005739|GO:0010506|GO:0005794|GO:0055037|GO:0016192|GO:0005764|GO:0006886|GO:0005525|GO:0005802|GO:0005776|GO:0045202|GO:0003924|GO:0031982|GO:0006727|GO:0048072|GO:0032482|GO:0010883|GO:0008057|GO:0006856|GO:0042470|GO:0016020|GO:0000166|GO:0005515|GO:0012505|GO:0032438|GO:0005739|GO:0010506|GO:0005794|GO:0055037|GO:0016192|GO:0005764|GO:0006886|GO:0005525|GO:0005802|GO:0005776|GO:0045202|GO:…	mitochondrion|regulation of autophagy|Golgi apparatus|recycling endosome|vesicle-mediated transport|lysosome|intracellular protein transport|GTP binding|trans-Golgi network|autophagosome|synapse|GTPase activity|vesicle|ommochrome biosynthetic process|compound eye pigmentation|Rab protein signal transduction|regulation of lipid storage|eye pigment granule organization|eye pigment precursor transpo…	Rab32 (Rab32) encodes a small GTPase that contributes to vesicle trafficking regulation. It is involved in eye development, autophagy and lipid storage. [Date last reviewed: 2019-09-26]	Rab32	Rab32	-	-	-	-
FBgn0026397	36.3325	-0.926656	0.296734	-3.12285	0.00179109	0.0542165	Or22b	protein_coding	GO:0016021|GO:0005886|GO:0030425|GO:0007165|GO:0032590|GO:0016020|GO:0004888|GO:0007608|GO:0005549|GO:0050911|GO:0004984|GO:0050896	integral component of membrane|plasma membrane|dendrite|signal transduction|dendrite membrane|membrane|transmembrane signaling receptor activity|sensory perception of smell|odorant binding|detection of chemical stimulus involved in sensory perception of smell|olfactory receptor activity|response to stimulus	-	Odorant receptor 22b	Or22b	Odorant receptor which mediates acceptance or avoidance behavior, depending on its substrates. The odorant receptor repertoire encodes a large collection of odor stimuli that vary widely in identity, intensity, and duration. Involved in the behavioral responses to esters. Complexes with Orco to form odorant-sensing units, providing sensitive and prolonged odorant signaling and calcium permeabilit…	Belongs to the insect chemoreceptor superfamily. Heteromeric odorant receptor channel (TC 1.A.69) family. Or2a subfamily.	Interacts with Orco, via conserved C-terminal cytoplasmic loops. Complexes exist early in the endomembrane system in olfactory sensory neurons (OSNs), coupling these complexes to the conserved ciliary trafficking pathway.	-
FBgn0039755	3643.79	0.388204	0.124422	3.12006	0.00180814	0.0546226	CG15531	protein_coding	GO:0016021|GO:0055114|GO:0005506|GO:0005789|GO:0006629|GO:0006636|GO:0004768|GO:0016020|GO:0016491|GO:0006633|GO:0016717	integral component of membrane|oxidation-reduction process|iron ion binding|endoplasmic reticulum membrane|lipid metabolic process|unsaturated fatty acid biosynthetic process|stearoyl-CoA 9-desaturase activity|membrane|oxidoreductase activity|fatty acid biosynthetic process|oxidoreductase activity, acting on paired donors, with oxidation of a pair of donors resulting in the reduction of molecular…	Insufficient genetic data for FlyBase to solicit a summary. [Date last reviewed: 2016-06-30]	-	CG15531	-	-	-	-
FBgn0262482	229.018	-0.443928	0.142318	-3.11927	0.00181301	0.0546596	CG43072	protein_coding	GO:0016021|GO:0016020|GO:0003674|GO:0008150|GO:0005575	integral component of membrane|membrane|molecular_function|biological_process|cellular_component	Insufficient genetic data for FlyBase to solicit a summary. [Date last reviewed: 2016-10-13]	-	CG43072	-	-	-	-
FBgn0013348	5122.9	0.251182	0.0805442	3.11857	0.00181734	0.0546804	TpnC41C	protein_coding	GO:0005509|GO:0019722|GO:0046872|GO:0000226|GO:0050790|GO:0030234|GO:0005509|GO:0019722|GO:0046872|GO:0000226|GO:0050790|GO:0030234	calcium ion binding|calcium-mediated signaling|metal ion binding|microtubule cytoskeleton organization|regulation of catalytic activity|enzyme regulator activity|calcium ion binding|calcium-mediated signaling|metal ion binding|microtubule cytoskeleton organization|regulation of catalytic activity|enzyme regulator activity	Troponin C at 41C (TpnC41C) is expressed predominantly in the pupal and adult tubular muscles, with minor amounts in the flight muscle. The encoded protein binds calcium to regulate muscle contraction. Its absence in tubular muscle is compensated by up-regulation of the product of TpnC4. [Date last reviewed: 2019-03-14]	Troponin C at 41C	TpnC41C	-	Belongs to the troponin C family.	-	-
FBgn0037069	9.877	-1.86144	0.597237	-3.11675	0.0018286	0.0549091	Cpr78Cc	protein_coding	GO:0031012|GO:0040003|GO:0008010|GO:0042302|GO:0062129	extracellular matrix|chitin-based cuticle development|structural constituent of chitin-based larval cuticle|structural constituent of cuticle|chitin-based extracellular matrix	Insufficient genetic data for FlyBase to solicit a summary. [Date last reviewed: 2016-06-30]	Cuticular protein 78Cc	Cpr78Cc	-	-	-	-
FBgn0034328	357.161	-0.91621	0.294184	-3.11441	0.00184314	0.0551574	IM23	protein_coding	GO:0005576|GO:0045087|GO:0050830|GO:0019731|GO:0009617|GO:0003674|GO:0002376	extracellular region|innate immune response|defense response to Gram-positive bacterium|antibacterial humoral response|response to bacterium|molecular_function|immune system process	Insufficient genetic data for FlyBase to solicit a summary. [Date last reviewed: 2016-06-30]	Bomanin Bicipital 1	BomBc1	May be involved in the Toll signaling pathway.	-	-	-
FBgn0033862	2865.68	-0.263189	0.0845115	-3.11424	0.00184421	0.0551574	CG6209	protein_coding	GO:0071011|GO:0071013|GO:0000398	precatalytic spliceosome|catalytic step 2 spliceosome|mRNA splicing, via spliceosome	Insufficient genetic data for FlyBase to solicit a summary. [Date last reviewed: 2016-06-30]	-	CG6209	-	-	-	-
FBgn0032371	2670.06	-0.293682	0.0943715	-3.11197	0.00185842	0.0554428	CG4983	protein_coding	GO:0003674|GO:0008150|GO:0005575|GO:0003674|GO:0008150|GO:0005575	molecular_function|biological_process|cellular_component|molecular_function|biological_process|cellular_component	Insufficient genetic data for FlyBase to solicit a summary. [Date last reviewed: 2016-06-30]	-	CG4983	-	-	-	-
FBgn0039915	493.92	-0.459916	0.147818	-3.11136	0.00186226	0.0554428	Gat	protein_coding	GO:0016021|GO:0005886|GO:0005328|GO:0043005|GO:0015812|GO:0071260|GO:0097386|GO:0005332|GO:0042165|GO:0016020|GO:0015293|GO:0055085|GO:0016021|GO:0005886|GO:0005328|GO:0043005|GO:0015812|GO:0071260|GO:0097386|GO:0005332|GO:0042165|GO:0016020|GO:0015293|GO:0055085	integral component of membrane|plasma membrane|neurotransmitter:sodium symporter activity|neuron projection|gamma-aminobutyric acid transport|cellular response to mechanical stimulus|glial cell projection|gamma-aminobutyric acid:sodium symporter activity|neurotransmitter binding|membrane|symporter activity|transmembrane transport|integral component of membrane|plasma membrane|neurotransmitter:sod…	GABA transporter (Gat) encodes a protein belonging to the SLC family that is expressed primarily in astrocytes, where it is thought to be required for uptake of GABA and other small molecules. It likely plays an important role in setting the excitatory/inhibitory balance of the CNS. [Date last reviewed: 2019-03-07]	GABA transporter	Gat	-	-	-	-
FBgn0265306	96.9112	-0.669411	0.215179	-3.11095	0.00186483	0.0554428	lncRNA:CR44279	ncRNA			-	long non-coding RNA:CR44279	lncRNA:CR44279	-	-	-	-
FBgn0004593	2.32674	-4.68764	1.50934	-3.10575	0.00189796	NA	Eig71Ef	protein_coding	GO:0005576|GO:0042742	extracellular region|defense response to bacterium	Insufficient genetic data for FlyBase to solicit a summary. [Date last reviewed: 2016-06-30]	Ecdysone-induced gene 71Ef	Eig71Ef	-	-	-	-
FBgn0045842	2418.95	-0.275045	0.0885871	-3.1048	0.00190407	0.0564024	yuri	protein_coding	GO:0005737|GO:0007291|GO:0042332|GO:0005635|GO:0032053|GO:0070865|GO:0016529|GO:0005737|GO:0007291|GO:0042332|GO:0005635|GO:0032053|GO:0070865|GO:0016529|GO:0005737|GO:0007291|GO:0042332|GO:0005635|GO:0032053|GO:0070865|GO:0016529|GO:0005737|GO:0007291|GO:0042332|GO:0005635|GO:0032053|GO:0070865|GO:0016529|GO:0005737|GO:0007291|GO:0042332|GO:0005635|GO:0032053|GO:0070865|GO:0016529|GO:0005737|GO:…	cytoplasm|sperm individualization|gravitaxis|nuclear envelope|ciliary basal body organization|investment cone|sarcoplasmic reticulum|cytoplasm|sperm individualization|gravitaxis|nuclear envelope|ciliary basal body organization|investment cone|sarcoplasmic reticulum|cytoplasm|sperm individualization|gravitaxis|nuclear envelope|ciliary basal body organization|investment cone|sarcoplasmic reticulum|…	yuri gagarin (yuri) encodes a protein involved in gravitaxis, ciliary basal body organization and sperm individualization. [Date last reviewed: 2019-09-19]	yuri gagarin	yuri	-	-	-	-
FBgn0264366	91.6929	-0.637222	0.205243	-3.10471	0.00190462	0.0564024	lncRNA:CR43818	ncRNA			-	long non-coding RNA:CR43818	lncRNA:CR43818	-	-	-	-
FBgn0034354	156.485	0.719241	0.231728	3.10381	0.00191047	0.0564642	GstE11	protein_coding	GO:0005737|GO:0004364|GO:0006749|GO:0016740|GO:0005515|GO:0005737|GO:0004364|GO:0006749|GO:0016740|GO:0005515	cytoplasm|glutathione transferase activity|glutathione metabolic process|transferase activity|protein binding|cytoplasm|glutathione transferase activity|glutathione metabolic process|transferase activity|protein binding	-	Glutathione S transferase E11	GstE11	-	-	-	-
FBgn0030283	1601.56	-0.295616	0.0954013	-3.09865	0.00194401	0.0572466	CG15198	protein_coding			Insufficient genetic data for FlyBase to solicit a summary. [Date last reviewed: 2016-06-30]	-	CG15198	-	-	-	-
FBgn0051029	6439.63	-0.261356	0.084352	-3.09839	0.00194573	0.0572466	CG31029	protein_coding			Insufficient genetic data for FlyBase to solicit a summary. [Date last reviewed: 2016-06-30]	-	CG31029	-	-	-	-
FBgn0264725	80.0492	0.67104	0.216605	3.09799	0.00194838	0.0572466	CG43993	protein_coding	GO:0003674|GO:0008150|GO:0005575	molecular_function|biological_process|cellular_component	Insufficient genetic data for FlyBase to solicit a summary. [Date last reviewed: 2016-10-13]	-	CG43993	-	-	-	-
FBgn0041194	1339.5	-0.415481	0.134157	-3.09698	0.001955	0.0573289	Prat2	protein_coding	GO:0046872|GO:0009113|GO:0051536|GO:0009116|GO:0004044|GO:0006189|GO:0016740|GO:0016757|GO:0006164|GO:0046872|GO:0009113|GO:0051536|GO:0009116|GO:0004044|GO:0006189|GO:0016740|GO:0016757|GO:0006164	metal ion binding|purine nucleobase biosynthetic process|iron-sulfur cluster binding|nucleoside metabolic process|amidophosphoribosyltransferase activity|'de novo' IMP biosynthetic process|transferase activity|transferase activity, transferring glycosyl groups|purine nucleotide biosynthetic process|metal ion binding|purine nucleobase biosynthetic process|iron-sulfur cluster binding|nucleoside met…	Phosphoribosylamidotransferase 2 (Prat2) encodes a type-2 glutamine amidotransferase that is essential in the pathway for de novo synthesis of inosine monophosphate (IMP). IMP is the precursor for purine nucleotides that are required for nucleic acids, energy transfer, cell signaling, and coenzymes. [Date last reviewed: 2018-11-08]	Phosphoribosylamidotransferase 2	Prat2	-	-	-	-
FBgn0063493	139.012	-0.609025	0.196855	-3.09378	0.00197626	0.0578393	GstE7	protein_coding	GO:0005737|GO:0004364|GO:0006749|GO:0016740|GO:0005515	cytoplasm|glutathione transferase activity|glutathione metabolic process|transferase activity|protein binding	Glutathione S transferase E7 (GstE7) encodes a cytosolic enzyme that functions in detoxication. It has high catalytic activity with various isothiocyanates and the toxic environmental pollutants 2,4,6-trinitrotoluene (TNT) and 2,4-dinitrotoluene (DNT). [Date last reviewed: 2019-02-28]	Glutathione S transferase E7	GstE7	-	-	-	-
FBgn0265067	148.952	0.653874	0.211874	3.08615	0.00202768	0.0591642	lncRNA:CR44178	ncRNA			-	long non-coding RNA:CR44178	lncRNA:CR44178	-	-	-	-
FBgn0031724	2084.14	-0.2464	0.0798607	-3.08537	0.00203301	0.0591642	CG18266	protein_coding	GO:0003674|GO:0008150|GO:0005575	molecular_function|biological_process|cellular_component	Insufficient genetic data for FlyBase to solicit a summary. [Date last reviewed: 2016-10-13]	-	CG18266	-	-	-	-
FBgn0000473	232.207	0.513416	0.166431	3.08486	0.00203646	0.0591642	Cyp6a2	protein_coding	GO:0055114|GO:0005506|GO:0005789|GO:0020037|GO:0016705|GO:0004497|GO:0046680|GO:0031000|GO:0016020|GO:0046872|GO:0005783|GO:0016491|GO:0031090|GO:0043231|GO:0070330	oxidation-reduction process|iron ion binding|endoplasmic reticulum membrane|heme binding|oxidoreductase activity, acting on paired donors, with incorporation or reduction of molecular oxygen|monooxygenase activity|response to DDT|response to caffeine|membrane|metal ion binding|endoplasmic reticulum|oxidoreductase activity|organelle membrane|intracellular membrane-bounded organelle|aromatase activ…	-	Cytochrome P450-6a2	Cyp6a2	Is involved in the breakdown of synthetic insecticides and may be involved in the metabolism of insect hormones.	Belongs to the cytochrome P450 family.	-	-
FBgn0052112	997.063	-0.27618	0.0895329	-3.08467	0.00203775	0.0591642	CG32112	protein_coding			Insufficient genetic data for FlyBase to solicit a summary. [Date last reviewed: 2017-07-13]	-	CG32112	-	-	-	-
FBgn0034636	273.014	-0.526891	0.170837	-3.08417	0.00204123	0.0591642	twz	protein_coding	GO:0008049|GO:0008344|GO:0051260|GO:0002121|GO:0008343|GO:0005515|GO:0008049|GO:0008344|GO:0051260|GO:0002121|GO:0008343|GO:0005515	male courtship behavior|adult locomotory behavior|protein homooligomerization|inter-male aggressive behavior|adult feeding behavior|protein binding|male courtship behavior|adult locomotory behavior|protein homooligomerization|inter-male aggressive behavior|adult feeding behavior|protein binding	-	tiwaz	twz	-	-	-	-
FBgn0051296	92.6729	0.796949	0.259062	3.07628	0.00209598	0.0606341	CG31296	protein_coding	GO:0005576|GO:0005615|GO:0032504|GO:0003674|GO:0008150|GO:0005576|GO:0005615|GO:0032504|GO:0003674|GO:0008150	extracellular region|extracellular space|multicellular organism reproduction|molecular_function|biological_process|extracellular region|extracellular space|multicellular organism reproduction|molecular_function|biological_process	-	-	CG31296	-	-	-	-
FBgn0033174	1873.36	-0.239931	0.0780733	-3.07315	0.00211814	0.0611573	CG11125	protein_coding	GO:0005881|GO:0005881	cytoplasmic microtubule|cytoplasmic microtubule	Insufficient genetic data for FlyBase to solicit a summary. [Date last reviewed: 2017-07-13]	-	CG11125	-	-	-	-
FBgn0259973	53.4996	1.15218	0.375049	3.07207	0.00212582	0.061261	Sfp79B	protein_coding	GO:0005615|GO:0032504|GO:0003674	extracellular space|multicellular organism reproduction|molecular_function	-	Seminal fluid protein 79	Sfp79B	-	-	-	-
FBgn0039703	54.4303	-0.79542	0.259131	-3.06957	0.00214371	0.0616131	CG7829	protein_coding	GO:0006508|GO:0004252|GO:0008236|GO:0016787	proteolysis|serine-type endopeptidase activity|serine-type peptidase activity|hydrolase activity	Insufficient genetic data for FlyBase to solicit a summary. [Date last reviewed: 2016-06-30]	-	CG7829	-	-	-	-
FBgn0267542	164.879	0.486356	0.158463	3.06921	0.00214624	0.0616131	asRNA:CR45882	ncRNA			-	antisense RNA:CR45882	asRNA:CR45882	-	-	-	-
FBgn0014903	207.195	-0.533429	0.17405	-3.0648	0.00217813	0.0624093	CG14630	protein_coding	GO:0055114|GO:0005739|GO:0016702|GO:0016491|GO:0008336|GO:0045329|GO:0046872|GO:0051213	oxidation-reduction process|mitochondrion|oxidoreductase activity, acting on single donors with incorporation of molecular oxygen, incorporation of two atoms of oxygen|oxidoreductase activity|gamma-butyrobetaine dioxygenase activity|carnitine biosynthetic process|metal ion binding|dioxygenase activity	Insufficient genetic data for FlyBase to solicit a summary. [Date last reviewed: 2016-06-30]	-	CG14630	-	-	-	-
FBgn0036311	3067.08	-0.231701	0.0756549	-3.06261	0.00219418	0.0627263	CG17666	protein_coding			Insufficient genetic data for FlyBase to solicit a summary. [Date last reviewed: 2016-06-30]	-	CG17666	-	-	-	-
FBgn0030589	304.524	0.380076	0.124121	3.06215	0.00219755	0.0627263	CG9519	protein_coding	GO:0055114|GO:0016491|GO:0050660|GO:0045455|GO:0016614	oxidation-reduction process|oxidoreductase activity|flavin adenine dinucleotide binding|ecdysteroid metabolic process|oxidoreductase activity, acting on CH-OH group of donors	Insufficient genetic data for FlyBase to solicit a summary. [Date last reviewed: 2016-06-30]	-	CG9519	-	-	-	-
FBgn0035253	2315.55	0.317232	0.103634	3.06109	0.00220531	0.062752	CG7971	protein_coding	GO:0071011|GO:0071013|GO:0000398|GO:0008380|GO:0071011|GO:0071013|GO:0000398|GO:0008380|GO:0071011|GO:0071013|GO:0000398|GO:0008380|GO:0071011|GO:0071013|GO:0000398|GO:0008380|GO:0071011|GO:0071013|GO:0000398|GO:0008380|GO:0071011|GO:0071013|GO:0000398|GO:0008380|GO:0000380	precatalytic spliceosome|catalytic step 2 spliceosome|mRNA splicing, via spliceosome|RNA splicing|precatalytic spliceosome|catalytic step 2 spliceosome|mRNA splicing, via spliceosome|RNA splicing|precatalytic spliceosome|catalytic step 2 spliceosome|mRNA splicing, via spliceosome|RNA splicing|precatalytic spliceosome|catalytic step 2 spliceosome|mRNA splicing, via spliceosome|RNA splicing|precata…	Insufficient genetic data for FlyBase to solicit a summary. [Date last reviewed: 2016-06-30]	Serine-arginine repetitive matrix 2/3/4	Srrm234	-	-	-	-
FBgn0050277	286.344	0.390797	0.127674	3.06089	0.00220681	0.062752	Oatp58Da	protein_coding	GO:0005887|GO:0055085|GO:0016020|GO:0022857|GO:0043252|GO:0015347|GO:0071702|GO:0022804|GO:0016021|GO:0006811|GO:0005886|GO:0005515	integral component of plasma membrane|transmembrane transport|membrane|transmembrane transporter activity|sodium-independent organic anion transport|sodium-independent organic anion transmembrane transporter activity|organic substance transport|active transmembrane transporter activity|integral component of membrane|ion transport|plasma membrane|protein binding	Insufficient genetic data for FlyBase to solicit a summary. [Date last reviewed: 2016-06-30]	Organic anion transporting polypeptide 58Da	Oatp58Da	-	-	-	-
FBgn0030583	29.084	-1.57126	0.514759	-3.05242	0.00227003	0.0644276	CG14410	protein_coding			Insufficient genetic data for FlyBase to solicit a summary. [Date last reviewed: 2016-10-13]	-	CG14410	-	-	-	-
FBgn0004169	22274.8	0.291647	0.0956148	3.05023	0.00228665	0.0647769	up	protein_coding	GO:0006937|GO:0005861|GO:0006937|GO:0005861|GO:0006937|GO:0005861|GO:0006937|GO:0005861|GO:0005509|GO:0045214|GO:0007498|GO:0007005|GO:0046716|GO:0005865|GO:0006936|GO:0006874|GO:0030240|GO:0030239|GO:0048644|GO:0006937|GO:0003009|GO:0005861|GO:0060048|GO:0005523|GO:0071689|GO:0030899|GO:0010882|GO:0006937|GO:0005861|GO:0006937|GO:0005861|GO:0006937|GO:0005861|GO:0006937|GO:0005861|GO:0006937|GO:…	regulation of muscle contraction|troponin complex|regulation of muscle contraction|troponin complex|regulation of muscle contraction|troponin complex|regulation of muscle contraction|troponin complex|calcium ion binding|sarcomere organization|mesoderm development|mitochondrion organization|muscle cell cellular homeostasis|striated muscle thin filament|muscle contraction|cellular calcium ion homeo…	upheld (up) encodes the striated muscle protein Troponin T. Troponins T, C and I form a regulatory complex with Tropomyosin that is found at regular intervals along the thin (F-actin) filaments of the muscle sarcomere. [Date last reviewed: 2019-03-21]	upheld	up	Troponin T is the tropomyosin-binding subunit of troponin, the thin filament regulatory complex which confers calcium-sensitivity to striated muscle actomyosin ATPase activity.	Belongs to the troponin T family.	-	-
FBgn0085197	5397.25	-0.288583	0.0946704	-3.0483	0.00230142	0.0650725	CG34168	protein_coding			Insufficient genetic data for FlyBase to solicit a summary. [Date last reviewed: 2016-06-30]	-	CG34168	-	-	-	-
FBgn0032684	676.138	0.353663	0.116059	3.04727	0.00230928	0.065172	Ugt301D1	protein_coding	GO:0016021|GO:0016758|GO:0008194|GO:0043231|GO:0015020|GO:0016020|GO:0016740|GO:0016757|GO:0016021|GO:0016758|GO:0008194|GO:0043231|GO:0015020|GO:0016020|GO:0016740|GO:0016757	integral component of membrane|transferase activity, transferring hexosyl groups|UDP-glycosyltransferase activity|intracellular membrane-bounded organelle|glucuronosyltransferase activity|membrane|transferase activity|transferase activity, transferring glycosyl groups|integral component of membrane|transferase activity, transferring hexosyl groups|UDP-glycosyltransferase activity|intracellular me…	Insufficient genetic data for FlyBase to solicit a summary. [Date last reviewed: 2016-06-30]	UDP-glycosyltransferase family 301 member D1	Ugt301D1	-	-	-	-
FBgn0265702	132.97	0.519857	0.170682	3.04577	0.00232088	0.0653766	asRNA:CR44509	ncRNA			-	antisense RNA:CR44509	asRNA:CR44509	-	-	-	-
FBgn0001296	412.628	0.354244	0.116348	3.0447	0.00232909	0.065485	kar	protein_coding	GO:0005887|GO:0055085|GO:0022857|GO:0006727|GO:0015349|GO:0015173|GO:0016020|GO:0016021|GO:0015801|GO:0070327|GO:0005887|GO:0055085|GO:0022857|GO:0006727|GO:0015349|GO:0015173|GO:0016020|GO:0016021|GO:0015801|GO:0070327	integral component of plasma membrane|transmembrane transport|transmembrane transporter activity|ommochrome biosynthetic process|thyroid hormone transmembrane transporter activity|aromatic amino acid transmembrane transporter activity|membrane|integral component of membrane|aromatic amino acid transport|thyroid hormone transport|integral component of plasma membrane|transmembrane transport|transm…	karmoisin (kar) encodes a protein involved in ommochrome biosynthesis. [Date last reviewed: 2019-09-12]	karmoisin	kar	-	-	-	-
FBgn0032066	123.098	-1.13926	0.374441	-3.04255	0.00234584	0.0658326	LManIII	protein_coding	GO:0046872|GO:0004559|GO:0006013|GO:0005774|GO:0030246|GO:0006517|GO:0003824|GO:0005975|GO:0016787|GO:0008152|GO:0016798|GO:0046872|GO:0004559|GO:0006013|GO:0005774|GO:0030246|GO:0006517|GO:0003824|GO:0005975|GO:0016787|GO:0008152|GO:0016798	metal ion binding|alpha-mannosidase activity|mannose metabolic process|vacuolar membrane|carbohydrate binding|protein deglycosylation|catalytic activity|carbohydrate metabolic process|hydrolase activity|metabolic process|hydrolase activity, acting on glycosyl bonds|metal ion binding|alpha-mannosidase activity|mannose metabolic process|vacuolar membrane|carbohydrate binding|protein deglycosylation…	Insufficient genetic data for FlyBase to solicit a summary. [Date last reviewed: 2016-06-30]	Lysosomal alpha-mannosidase III	LManIII	-	-	-	-
FBgn0034274	199.777	-0.512752	0.168916	-3.03555	0.00240094	0.0672532	CG10931	protein_coding	GO:0051568|GO:0043966|GO:0035097|GO:0000123|GO:0042800|GO:0005515	histone H3-K4 methylation|histone H3 acetylation|histone methyltransferase complex|histone acetyltransferase complex|histone methyltransferase activity (H3-K4 specific)|protein binding	Insufficient genetic data for FlyBase to solicit a summary. [Date last reviewed: 2016-06-30]	-	CG10931	-	-	-	-
FBgn0038722	934.82	-0.287477	0.0947647	-3.03358	0.00241668	0.0675679	Nup58	protein_coding	GO:0015031|GO:0051028|GO:0005643|GO:0008139|GO:0017056|GO:0005635|GO:0006913|GO:0005634|GO:0005515	protein transport|mRNA transport|nuclear pore|nuclear localization sequence binding|structural constituent of nuclear pore|nuclear envelope|nucleocytoplasmic transport|nucleus|protein binding	-	Nucleoporin 58kD	Nup58	Component of the nuclear pore complex, a complex required for the trafficking across the nuclear membrane.	Belongs to the NUP58 family.	-	-
FBgn0003638	3626.5	0.29205	0.0963008	3.03269	0.00242385	0.0676426	su(w[a])	protein_coding	GO:0003723|GO:0006396|GO:0003723|GO:0006396|GO:0016607|GO:0000395|GO:0005634|GO:0006397|GO:0008380	RNA binding|RNA processing|RNA binding|RNA processing|nuclear speck|mRNA 5'-splice site recognition|nucleus|mRNA processing|RNA splicing	-	suppressor of white-apricot	su(w[a])	Regulator of pre-mRNA splicing (and, possibly, of other RNA processing events). Regulate its own expression at the level of RNA processing.	-	-	-
FBgn0270925	47454	-0.261797	0.0864414	-3.02861	0.00245684	0.0684361	CG4836	protein_coding	GO:0055114|GO:0003939|GO:0006062|GO:0055114|GO:0003939|GO:0006062|GO:0055114|GO:0003939|GO:0006062|GO:0055114|GO:0003939|GO:0006062|GO:0055114|GO:0003939|GO:0006062	oxidation-reduction process|L-iditol 2-dehydrogenase activity|sorbitol catabolic process|oxidation-reduction process|L-iditol 2-dehydrogenase activity|sorbitol catabolic process|oxidation-reduction process|L-iditol 2-dehydrogenase activity|sorbitol catabolic process|oxidation-reduction process|L-iditol 2-dehydrogenase activity|sorbitol catabolic process|oxidation-reduction process|L-iditol 2-dehy…	Insufficient genetic data for FlyBase to solicit a summary. [Date last reviewed: 2016-06-30]	-	CG4836	-	-	-	-
FBgn0262690	97.8829	-0.701148	0.231909	-3.02337	0.00249973	0.0695018	asRNA:CR43160	ncRNA			-	antisense RNA:CR43160	asRNA:CR43160	-	-	-	-
FBgn0003721	13720.1	0.265303	0.0878107	3.0213	0.0025169	0.0698498	Tm1	protein_coding	GO:0005829|GO:0003779|GO:0051015|GO:0030017|GO:0005737|GO:0048813|GO:0048477|GO:0007015|GO:0045451|GO:0005856|GO:0005884|GO:0016529|GO:0070865|GO:0007315|GO:0055093|GO:0019901|GO:0006936|GO:0010591|GO:0005829|GO:0048477|GO:0048813|GO:0007015|GO:0003779|GO:0051015|GO:0043186|GO:0045451|GO:0030017|GO:0005884|GO:0007315|GO:0010591|GO:0006936|GO:0070865|GO:0019894|GO:0055093|GO:0043149|GO:0005737|GO:…	cytosol|actin binding|actin filament binding|sarcomere|cytoplasm|dendrite morphogenesis|oogenesis|actin filament organization|pole plasm oskar mRNA localization|cytoskeleton|actin filament|sarcoplasmic reticulum|investment cone|pole plasm assembly|response to hyperoxia|protein kinase binding|muscle contraction|regulation of lamellipodium assembly|cytosol|oogenesis|dendrite morphogenesis|actin fil…	-	Tropomyosin 1	Tm1	Tropomyosin, in association with the troponin complex, plays a central role in the calcium dependent regulation of muscle contraction.	Belongs to the tropomyosin family.	Homodimer (Probable). May interact with Unc-89 (via protein kinase domain 2) (PubMed:26251439). <newline> Homodimer.	-
FBgn0039421	765.138	-0.283079	0.0937735	-3.01875	0.00253822	0.0703116	CG6036	protein_coding	GO:0005634|GO:0005737|GO:0005829|GO:0006470|GO:0003824|GO:0004721|GO:0004722|GO:0000287|GO:0004724|GO:0030145|GO:0043169|GO:0016020|GO:0016787|GO:0046872|GO:0032873	nucleus|cytoplasm|cytosol|protein dephosphorylation|catalytic activity|phosphoprotein phosphatase activity|protein serine/threonine phosphatase activity|magnesium ion binding|magnesium-dependent protein serine/threonine phosphatase activity|manganese ion binding|cation binding|membrane|hydrolase activity|metal ion binding|negative regulation of stress-activated MAPK cascade	Insufficient genetic data for FlyBase to solicit a summary. [Date last reviewed: 2016-06-30]	-	CG6036	-	-	-	-
FBgn0266000	2903.04	-0.242309	0.0803171	-3.0169	0.00255373	0.0706108	CG44774	protein_coding	GO:0016580|GO:0030336|GO:0003674|GO:0016580|GO:0030336|GO:0003674|GO:0016580|GO:0030336|GO:0003674|GO:0016580|GO:0030336|GO:0003674|GO:0016580|GO:0030336|GO:0003674|GO:0016580|GO:0030336|GO:0003674|GO:0016580|GO:0030336|GO:0003674|GO:0016580|GO:0030336|GO:0003674	Sin3 complex|negative regulation of cell migration|molecular_function|Sin3 complex|negative regulation of cell migration|molecular_function|Sin3 complex|negative regulation of cell migration|molecular_function|Sin3 complex|negative regulation of cell migration|molecular_function|Sin3 complex|negative regulation of cell migration|molecular_function|Sin3 complex|negative regulation of cell migratio…	Insufficient genetic data for FlyBase to solicit a summary. [Date last reviewed: 2016-06-30]	-	CG44774	-	-	-	-
FBgn0034904	571.333	-0.390508	0.129518	-3.01509	0.00256902	0.0708291	CG15800	protein_coding	GO:0006511|GO:0005634|GO:0005737|GO:0031146|GO:0097602	ubiquitin-dependent protein catabolic process|nucleus|cytoplasm|SCF-dependent proteasomal ubiquitin-dependent protein catabolic process|cullin family protein binding	Insufficient genetic data for FlyBase to solicit a summary. [Date last reviewed: 2016-06-30]	-	CG15800	-	-	-	-
FBgn0033953	11242.6	-0.236301	0.078379	-3.01485	0.00257106	0.0708291	CG12861	protein_coding	GO:0003674|GO:0008150|GO:0005575	molecular_function|biological_process|cellular_component	Insufficient genetic data for FlyBase to solicit a summary. [Date last reviewed: 2016-06-30]	-	CG12861	-	-	-	-
FBgn0266730	83.8363	-0.674962	0.223962	-3.01374	0.00258048	0.0708361	lncRNA:CR45203	ncRNA			-	long non-coding RNA:CR45203	lncRNA:CR45203	-	-	-	-
FBgn0035164	397.03	-0.359655	0.11934	-3.01371	0.00258075	0.0708361	CG13901	protein_coding			Insufficient genetic data for FlyBase to solicit a summary. [Date last reviewed: 2016-06-30]	-	CG13901	-	-	-	-
FBgn0284226	607.201	0.388968	0.129194	3.01074	0.00260615	0.0714028	CG46310	protein_coding			-	-	CG46310	-	-	-	-
FBgn0069938	352.454	-0.345174	0.114801	-3.00671	0.00264089	0.0722228	CG41106	protein_coding	GO:0016021|GO:0035307|GO:0071595|GO:0016020|GO:0003674|GO:0008150|GO:0005575|GO:0005634|GO:0006629|GO:0005737|GO:0031965	integral component of membrane|positive regulation of protein dephosphorylation|Nem1-Spo7 phosphatase complex|membrane|molecular_function|biological_process|cellular_component|nucleus|lipid metabolic process|cytoplasm|nuclear membrane	-	-	CG41106	-	-	-	-
FBgn0264466	17.7168	-1.31889	0.438948	-3.00465	0.00265886	0.0725821	lncRNA:CR43874	ncRNA			-	long non-coding RNA:CR43874	lncRNA:CR43874	-	-	-	-
FBgn0015316	115.316	-0.636724	0.211981	-3.00368	0.00266732	0.0726808	Try29F	protein_coding	GO:0006508|GO:0004252|GO:0008236|GO:0016787|GO:0008233|GO:0006508|GO:0004252|GO:0008236|GO:0016787|GO:0008233	proteolysis|serine-type endopeptidase activity|serine-type peptidase activity|hydrolase activity|peptidase activity|proteolysis|serine-type endopeptidase activity|serine-type peptidase activity|hydrolase activity|peptidase activity	Insufficient genetic data for FlyBase to solicit a summary. [Date last reviewed: 2016-06-30]	Trypsin 29F	Try29F	-	-	-	-
FBgn0250847	1727.2	0.351731	0.117147	3.00247	0.00267795	0.0728382	CG14034	protein_coding	GO:0005615|GO:0032504|GO:0016042|GO:0016298|GO:0052689|GO:0080030|GO:0006644|GO:0006629|GO:0004620|GO:0016787|GO:0005576|GO:0004806|GO:0005615|GO:0032504|GO:0016042|GO:0016298|GO:0052689|GO:0080030|GO:0006644|GO:0006629|GO:0004620|GO:0016787|GO:0005576|GO:0004806	extracellular space|multicellular organism reproduction|lipid catabolic process|lipase activity|carboxylic ester hydrolase activity|methyl indole-3-acetate esterase activity|phospholipid metabolic process|lipid metabolic process|phospholipase activity|hydrolase activity|extracellular region|triglyceride lipase activity|extracellular space|multicellular organism reproduction|lipid catabolic proces…	Insufficient genetic data for FlyBase to solicit a summary. [Date last reviewed: 2016-06-30]	-	CG14034	-	-	-	-
FBgn0051077	625.411	-0.394816	0.131587	-3.00042	0.00269606	0.0729885	CG31077	protein_coding	GO:0005576|GO:0008061|GO:0006030	extracellular region|chitin binding|chitin metabolic process	-	-	CG31077	-	-	-	-
FBgn0034520	201.531	0.442952	0.147637	3.00027	0.00269741	0.0729885	lms	protein_coding	GO:0003677|GO:0005634|GO:0006355|GO:0043565|GO:0007526|GO:0060361|GO:0006357|GO:0000978|GO:0007417|GO:0001227|GO:0030182|GO:0000981|GO:0000122|GO:0001162|GO:0003677|GO:0005634|GO:0006355|GO:0043565|GO:0007526|GO:0060361|GO:0006357|GO:0000978|GO:0007417|GO:0001227|GO:0030182|GO:0000981|GO:0000122|GO:0001162	DNA binding|nucleus|regulation of transcription, DNA-templated|sequence-specific DNA binding|larval somatic muscle development|flight|regulation of transcription by RNA polymerase II|RNA polymerase II cis-regulatory region sequence-specific DNA binding|central nervous system development|DNA-binding transcription repressor activity, RNA polymerase II-specific|neuron differentiation|DNA-binding tra…	lateral muscles scarcer (lms) encodes a homeodomain transcription factor that is an identity factor for lateral transverse muscles. [Date last reviewed: 2019-03-14]	lateral muscles scarcer	lms	-	-	-	-
FBgn0265685	14.8828	-1.47239	0.490763	-3.0002	0.00269806	0.0729885	lncRNA:CR44492	ncRNA			-	long non-coding RNA:CR44492	lncRNA:CR44492	-	-	-	-
FBgn0034032	273.669	-0.382504	0.127628	-2.99703	0.00272628	0.0733917	CG8195	protein_coding	GO:0016021|GO:0016020	integral component of membrane|membrane	Insufficient genetic data for FlyBase to solicit a summary. [Date last reviewed: 2016-06-30]	-	CG8195	-	-	-	-
FBgn0085285	136.569	0.610246	0.203622	2.99696	0.00272687	0.0733917	CG34256	protein_coding	GO:0003674|GO:0008150|GO:0005575	molecular_function|biological_process|cellular_component	Insufficient genetic data for FlyBase to solicit a summary. [Date last reviewed: 2016-10-13]	-	CG34256	-	-	-	-
FBgn0037759	3642.71	-0.255549	0.085272	-2.99687	0.00272763	0.0733917	CG8526	protein_coding	GO:0004067|GO:0016787|GO:0005515|GO:0006520|GO:0004067|GO:0016787|GO:0005515	asparaginase activity|hydrolase activity|protein binding|cellular amino acid metabolic process|asparaginase activity|hydrolase activity|protein binding	-	-	CG8526	-	-	-	-
FBgn0034485	294.896	0.388069	0.129581	2.99481	0.00274613	0.0737475	CG11099	protein_coding	GO:0005886|GO:0003674|GO:0008150|GO:0005575|GO:0005515|GO:0005886|GO:0003674|GO:0008150|GO:0005575|GO:0005515	plasma membrane|molecular_function|biological_process|cellular_component|protein binding|plasma membrane|molecular_function|biological_process|cellular_component|protein binding	Insufficient genetic data for FlyBase to solicit a summary. [Date last reviewed: 2016-06-30]	-	CG11099	-	-	-	-
FBgn0033778	9.4159	-1.79326	0.59889	-2.99431	0.00275067	0.0737475	Balat	protein_coding	GO:0016021|GO:0005887|GO:0055085|GO:0001761|GO:0001694|GO:0001762|GO:0022857|GO:0016020|GO:0005886|GO:0006865	integral component of membrane|integral component of plasma membrane|transmembrane transport|beta-alanine transmembrane transporter activity|histamine biosynthetic process|beta-alanine transport|transmembrane transporter activity|membrane|plasma membrane|amino acid transport	Beta-alanine transporter (Balat) is predicted to encode a carnitine transporter, which catalyzes the movement of acyl-carnitine across the inner mitochondrial membrane. It is essential for metabolism of long-chain fatty acids. [Date last reviewed: 2019-03-07]	Beta-alanine transporter	Balat	Beta-alanine transporter required for the uptake of beta-alanine by the glia (PubMed:28806173). Required for the recycling process of the neurotransmitter histamine in photoreceptor neurons of the compound eye and therefore for photoreceptor synaptic transmission (PubMed:28806173). Following histamine release from photoreceptors and its uptake by glia, histamine is conjugated to beta-alanine by e…	Belongs to the major facilitator (TC 2.A.1) superfamily. Organic cation transporter (TC 2.A.1.19) family.	-	-
FBgn0038607	1722.87	-0.273031	0.0912183	-2.99315	0.0027611	0.073895	hmw	protein_coding	GO:0005737|GO:0007283|GO:0005929|GO:0043204|GO:0044458|GO:0007291|GO:0007288|GO:0050910|GO:0030154|GO:0042995|GO:0030030	cytoplasm|spermatogenesis|cilium|perikaryon|motile cilium assembly|sperm individualization|sperm axoneme assembly|detection of mechanical stimulus involved in sensory perception of sound|cell differentiation|cell projection|cell projection organization	-	hemingway	hmw	Involved in assembly and/or maintenance of motile cilia. Required during spermatogenesis for axoneme elongation. Necessary for optimal function of the chordotonal (hearing) organs.	Belongs to the CFAP97 family.	-	-
FBgn0250867	381.14	0.351602	0.117555	2.99097	0.00278097	0.0742401	CG42238	protein_coding			Insufficient genetic data for FlyBase to solicit a summary. [Date last reviewed: 2016-06-30]	-	CG42238	-	-	-	-
FBgn0034429	34.9472	-0.981522	0.328219	-2.99045	0.00278567	0.0742401	AANATL4	protein_coding	GO:0005737|GO:0008080|GO:0016740|GO:0016746|GO:0004060	cytoplasm|N-acetyltransferase activity|transferase activity|transferase activity, transferring acyl groups|arylamine N-acetyltransferase activity	Insufficient genetic data for FlyBase to solicit a summary. [Date last reviewed: 2016-06-30]	Arylalkylamine N-acetyltransferase-like 4	AANATL4	-	-	-	-
FBgn0031968	593.825	-0.451114	0.150869	-2.9901	0.00278883	0.0742401	CG7231	protein_coding			Insufficient genetic data for FlyBase to solicit a summary. [Date last reviewed: 2017-07-13]	-	CG7231	-	-	-	-
FBgn0035534	178.502	0.456435	0.152904	2.98512	0.0028347	0.0753216	mRpS6	protein_coding	GO:0006412|GO:0003735|GO:0019843|GO:0005840|GO:0032543|GO:0005763|GO:0070181|GO:0005739|GO:0006412|GO:0003735|GO:0019843|GO:0005840|GO:0032543|GO:0005763|GO:0070181|GO:0005739	translation|structural constituent of ribosome|rRNA binding|ribosome|mitochondrial translation|mitochondrial small ribosomal subunit|small ribosomal subunit rRNA binding|mitochondrion|translation|structural constituent of ribosome|rRNA binding|ribosome|mitochondrial translation|mitochondrial small ribosomal subunit|small ribosomal subunit rRNA binding|mitochondrion	Insufficient genetic data for FlyBase to solicit a summary. [Date last reviewed: 2016-06-30]	mitochondrial ribosomal protein S6	mRpS6	-	Belongs to the bacterial ribosomal protein bS6 family.	Component of the mitochondrial ribosome small subunit (28S) which comprises a 12S rRNA and about 30 distinct proteins.	-
FBgn0034263	1437.12	-0.266164	0.089179	-2.9846	0.00283949	0.0753216	CG10934	protein_coding	GO:0016021|GO:0016020	integral component of membrane|membrane	Insufficient genetic data for FlyBase to solicit a summary. [Date last reviewed: 2016-06-30]	-	CG10934	-	-	-	-
FBgn0036008	668.063	-0.283351	0.0950044	-2.98251	0.00285898	0.0757049	CG3408	protein_coding	GO:0016021|GO:0005737|GO:0016020|GO:0003674|GO:0005575|GO:0005515|GO:0016021|GO:0005737|GO:0016020|GO:0003674|GO:0005575|GO:0005515	integral component of membrane|cytoplasm|membrane|molecular_function|cellular_component|protein binding|integral component of membrane|cytoplasm|membrane|molecular_function|cellular_component|protein binding	-	-	CG3408	-	-	-	-
FBgn0261057	150.429	0.532114	0.178543	2.98032	0.00287949	0.0760989	Sfp36F	protein_coding	GO:0005615|GO:0032504|GO:0003674|GO:0005615|GO:0032504|GO:0003674	extracellular space|multicellular organism reproduction|molecular_function|extracellular space|multicellular organism reproduction|molecular_function	-	Seminal fluid protein 36F	Sfp36F	-	-	-	-
FBgn0035952	918.124	-0.324822	0.109007	-2.97984	0.00288399	0.0760989	CG5280	protein_coding	GO:0003674|GO:0008150|GO:0005575	molecular_function|biological_process|cellular_component	Insufficient genetic data for FlyBase to solicit a summary. [Date last reviewed: 2016-06-30]	-	CG5280	-	Belongs to the UPF0193 (EVG1) family.	-	-
FBgn0267326	1195.47	-0.271337	0.0910809	-2.97907	0.0028912	0.0761553	Ntl	protein_coding	GO:0016021|GO:0005886|GO:1903346|GO:0015193|GO:0015824|GO:0006836|GO:0015187|GO:0005326|GO:0030317|GO:0005328|GO:1903804|GO:0005283|GO:0015179|GO:0016020|GO:0015293|GO:0055085|GO:0035524|GO:0016021|GO:0005886|GO:1903346|GO:0015193|GO:0015824|GO:0006836|GO:0015187|GO:0005326|GO:0030317|GO:0005328|GO:1903804|GO:0005283|GO:0015179|GO:0016020|GO:0015293|GO:0055085|GO:0035524	integral component of membrane|plasma membrane|positive regulation of protein polyglycylation|L-proline transmembrane transporter activity|proline transport|neurotransmitter transport|glycine transmembrane transporter activity|neurotransmitter transmembrane transporter activity|flagellated sperm motility|neurotransmitter:sodium symporter activity|glycine import across plasma membrane|amino acid:s…	Neurotransmitter transporter-like (Ntl) encodes a glycine transporter of the SLC6 class, closely related to neurotransmitter transporters and other amino acid transporters. Ntl expression is testes-specific and its mutants are male-sterile, producing sperm with a significant reduction in glycylated tubulin. [Date last reviewed: 2019-03-21]	Neurotransmitter transporter-like	Ntl	-	-	-	-
FBgn0028943	362.018	-0.347942	0.116833	-2.97811	0.00290034	0.0762622	CG15638	protein_coding			Insufficient genetic data for FlyBase to solicit a summary. [Date last reviewed: 2016-06-30]	-	CG15638	-	-	-	-
FBgn0262000	108.014	0.552573	0.185639	2.97661	0.00291458	0.0765026	CG42818	protein_coding			Insufficient genetic data for FlyBase to solicit a summary. [Date last reviewed: 2016-06-30]	-	CG42818	-	-	-	-
FBgn0267128	34.4707	-0.917134	0.308801	-2.96998	0.00297818	0.0779663	lncRNA:CR45568	ncRNA			-	long non-coding RNA:CR45568	lncRNA:CR45568	-	-	-	-
FBgn0036704	1037.31	-0.300933	0.101334	-2.96972	0.00298073	0.0779663	CG6497	protein_coding	GO:0016021|GO:0016020|GO:0016021|GO:0016020	integral component of membrane|membrane|integral component of membrane|membrane	Insufficient genetic data for FlyBase to solicit a summary. [Date last reviewed: 2016-06-30]	-	CG6497	-	-	-	-
FBgn0039543	449.977	0.418778	0.141129	2.96735	0.00300376	0.078432	CROT	protein_coding	GO:0005777|GO:0006635|GO:0016746|GO:0008458|GO:0016740|GO:0005777|GO:0006635|GO:0016746|GO:0008458|GO:0016740|GO:0005777|GO:0006635|GO:0016746|GO:0008458|GO:0016740|GO:0005777|GO:0006635|GO:0016746|GO:0008458|GO:0016740|GO:0005777|GO:0006635|GO:0016746|GO:0008458|GO:0016740|GO:0005777|GO:0006635|GO:0016746|GO:0008458|GO:0016740	peroxisome|fatty acid beta-oxidation|transferase activity, transferring acyl groups|carnitine O-octanoyltransferase activity|transferase activity|peroxisome|fatty acid beta-oxidation|transferase activity, transferring acyl groups|carnitine O-octanoyltransferase activity|transferase activity|peroxisome|fatty acid beta-oxidation|transferase activity, transferring acyl groups|carnitine O-octanoyltra…	Insufficient genetic data for FlyBase to solicit a summary. [Date last reviewed: 2016-06-30]	Carnitine O-octanoyltransferase	CROT	-	-	-	-
FBgn0034046	444.484	0.398244	0.134383	2.96351	0.0030415	0.0792796	tun	protein_coding	GO:0005634|GO:0005829|GO:0016811|GO:0008418|GO:0006464|GO:0070773|GO:0016787|GO:0005634|GO:0005829|GO:0016811|GO:0008418|GO:0006464|GO:0070773|GO:0016787|GO:0005634|GO:0005829|GO:0016811|GO:0008418|GO:0006464|GO:0070773|GO:0016787|GO:0005634|GO:0005829|GO:0016811|GO:0008418|GO:0006464|GO:0070773|GO:0016787	nucleus|cytosol|hydrolase activity, acting on carbon-nitrogen (but not peptide) bonds, in linear amides|protein-N-terminal asparagine amidohydrolase activity|cellular protein modification process|protein-N-terminal glutamine amidohydrolase activity|hydrolase activity|nucleus|cytosol|hydrolase activity, acting on carbon-nitrogen (but not peptide) bonds, in linear amides|protein-N-terminal asparagi…	-	tungus	tun	Mediates the side-chain deamidation of N-terminal glutamine residues to glutamate, an important step in N-end rule pathway of protein degradation. Conversion of the resulting N-terminal glutamine to glutamate renders the protein susceptible to arginylation, polyubiquitination and degradation as specified by the N-end rule. Does not act on substrates with internal or C-terminal glutamine and does …	Belongs to the NTAQ1 family.	Monomer.	-
FBgn0033377	5089.88	-0.246696	0.0832884	-2.96195	0.00305697	0.0795448	Pgm2a	protein_coding	GO:0005975|GO:0000287|GO:0016868|GO:0046872|GO:0016853|GO:0071704|GO:0006006	carbohydrate metabolic process|magnesium ion binding|intramolecular transferase activity, phosphotransferases|metal ion binding|isomerase activity|organic substance metabolic process|glucose metabolic process	-	Phosphoglucomutase 2a	Pgm2a	-	-	-	-
FBgn0259974	394.567	0.382491	0.12933	2.95749	0.00310153	0.0805647	Sfp84E	protein_coding	GO:0005615|GO:0032504|GO:0003674	extracellular space|multicellular organism reproduction|molecular_function	-	Seminal fluid protein 84E	Sfp84E	-	-	-	-
FBgn0030159	166.899	-0.503063	0.170169	-2.95625	0.00311401	0.0807492	CG9689	protein_coding			Insufficient genetic data for FlyBase to solicit a summary. [Date last reviewed: 2016-06-30]	-	CG9689	-	-	-	-
FBgn0040371	3189.49	-0.217177	0.0734819	-2.95551	0.0031215	0.0808039	CG12470	protein_coding	GO:0003674|GO:0008150|GO:0005575	molecular_function|biological_process|cellular_component	Insufficient genetic data for FlyBase to solicit a summary. [Date last reviewed: 2016-06-30]	-	CG12470	-	-	-	-
FBgn0267005	3.66629	4.28019	1.45066	2.95052	0.00317244	0.0819811	lncRNA:CR45449	ncRNA			-	long non-coding RNA:CR45449	lncRNA:CR45449	-	-	-	-
FBgn0032269	10636.2	-0.289353	0.0981056	-2.9494	0.00318388	0.0821354	w-cup	protein_coding			Insufficient genetic data for FlyBase to solicit a summary. [Date last reviewed: 2016-06-30]	world cup	w-cup	-	-	-	-
FBgn0267106	63.0481	0.68444	0.232276	2.94667	0.0032122	0.0827238	CG45546	protein_coding	GO:0003674|GO:0008150|GO:0005575	molecular_function|biological_process|cellular_component	Insufficient genetic data for FlyBase to solicit a summary. [Date last reviewed: 2017-07-13]	-	CG45546	-	-	-	-
FBgn0267987	35.9619	-0.917281	0.311724	-2.94261	0.0032546	0.0836154	lncRNA:CR46254	ncRNA			-	long non-coding RNA:CR46254	lncRNA:CR46254	-	-	-	-
FBgn0051524	417.402	0.400875	0.136246	2.94229	0.00325796	0.0836154	CG31524	protein_coding	GO:0005783|GO:0055114|GO:0005506|GO:0016705|GO:0018401|GO:0016702|GO:0004656|GO:0031418|GO:0016491|GO:0046872|GO:0005788|GO:0051213|GO:0019511|GO:0005515|GO:0005783|GO:0055114|GO:0005506|GO:0016705|GO:0018401|GO:0016702|GO:0004656|GO:0031418|GO:0016491|GO:0046872|GO:0005788|GO:0051213|GO:0019511|GO:0005515	endoplasmic reticulum|oxidation-reduction process|iron ion binding|oxidoreductase activity, acting on paired donors, with incorporation or reduction of molecular oxygen|peptidyl-proline hydroxylation to 4-hydroxy-L-proline|oxidoreductase activity, acting on single donors with incorporation of molecular oxygen, incorporation of two atoms of oxygen|procollagen-proline 4-dioxygenase activity|L-ascor…	Insufficient genetic data for FlyBase to solicit a summary. [Date last reviewed: 2016-06-30]	-	CG31524	-	-	-	-
FBgn0039759	42.3901	-0.802868	0.272968	-2.94125	0.00326886	0.0837519	CG9733	protein_coding	GO:0006508|GO:0004252|GO:0005615|GO:0016787|GO:0008233|GO:0008236|GO:0005576|GO:0006508|GO:0004252|GO:0005615|GO:0016787|GO:0008233|GO:0008236|GO:0005576	proteolysis|serine-type endopeptidase activity|extracellular space|hydrolase activity|peptidase activity|serine-type peptidase activity|extracellular region|proteolysis|serine-type endopeptidase activity|extracellular space|hydrolase activity|peptidase activity|serine-type peptidase activity|extracellular region	-	-	CG9733	-	-	-	-
FBgn0032074	486.436	-0.388407	0.132141	-2.93934	0.00328911	0.0841273	Tsp29Fa	protein_coding	GO:0016021|GO:0005887|GO:0016020|GO:0003674|GO:0016021|GO:0005887|GO:0016020|GO:0003674|GO:0016021|GO:0005887|GO:0016020|GO:0003674	integral component of membrane|integral component of plasma membrane|membrane|molecular_function|integral component of membrane|integral component of plasma membrane|membrane|molecular_function|integral component of membrane|integral component of plasma membrane|membrane|molecular_function	Insufficient genetic data for FlyBase to solicit a summary. [Date last reviewed: 2016-06-30]	Tetraspanin 29Fa	Tsp29Fa	-	-	-	-
FBgn0035124	1624.65	-0.247509	0.0842417	-2.93807	0.00330257	0.0843129	ttm2	protein_coding	GO:0016021|GO:0005739|GO:0015031|GO:0005743|GO:0006470|GO:0004725|GO:0016607|GO:0030150|GO:0005744|GO:0007005|GO:0004721|GO:0004722|GO:0043021|GO:0007006|GO:0016020|GO:0035335	integral component of membrane|mitochondrion|protein transport|mitochondrial inner membrane|protein dephosphorylation|protein tyrosine phosphatase activity|nuclear speck|protein import into mitochondrial matrix|TIM23 mitochondrial import inner membrane translocase complex|mitochondrion organization|phosphoprotein phosphatase activity|protein serine/threonine phosphatase activity|ribonucleoprotein…	tiny tim 2 (ttm2) encodes a mitochondrial inner membrane protein that is involved in mitochondrial protein translocation and maintenance of mitochondrial membrane potential. [Date last reviewed: 2019-03-14]	tiny tim 2	ttm2	Essential component of the TIM23 complex, a complex that mediates the translocation of transit peptide-containing proteins across the mitochondrial inner membrane.	Belongs to the TIM50 family.	Component of the TIM23 complex at least composed of Tim23, Tim17 (Tim17a1, Tim17a2 or Tim17b1) and a Tim50.	-
FBgn0034588	592.938	-0.33936	0.115523	-2.9376	0.0033076	0.0843129	CG9394	protein_coding	GO:0030246|GO:2001070|GO:0046475|GO:0047389|GO:0006629|GO:0008081|GO:0016787|GO:0005737|GO:0030246|GO:2001070|GO:0046475|GO:0047389|GO:0006629|GO:0008081|GO:0016787|GO:0005737	carbohydrate binding|starch binding|glycerophospholipid catabolic process|glycerophosphocholine phosphodiesterase activity|lipid metabolic process|phosphoric diester hydrolase activity|hydrolase activity|cytoplasm|carbohydrate binding|starch binding|glycerophospholipid catabolic process|glycerophosphocholine phosphodiesterase activity|lipid metabolic process|phosphoric diester hydrolase activity|…	Insufficient genetic data for FlyBase to solicit a summary. [Date last reviewed: 2016-06-30]	-	CG9394	-	-	-	-
FBgn0034471	135.494	0.494842	0.168563	2.93566	0.00332842	0.0846998	Obp56e	protein_coding	GO:0005576|GO:0005615|GO:0032504|GO:0007606|GO:0007608|GO:0005549|GO:0005576|GO:0005615|GO:0032504|GO:0007606|GO:0007608|GO:0005549	extracellular region|extracellular space|multicellular organism reproduction|sensory perception of chemical stimulus|sensory perception of smell|odorant binding|extracellular region|extracellular space|multicellular organism reproduction|sensory perception of chemical stimulus|sensory perception of smell|odorant binding	Insufficient genetic data for FlyBase to solicit a summary. [Date last reviewed: 2016-06-30]	Odorant-binding protein 56e	Obp56e	-	-	-	-
FBgn0035097	721.753	-0.315762	0.107586	-2.93499	0.00333561	0.0847391	CG13405	protein_coding			Insufficient genetic data for FlyBase to solicit a summary. [Date last reviewed: 2016-06-30]	-	CG13405	-	-	-	-
FBgn0053082	225.769	-0.490966	0.167387	-2.93311	0.00335582	0.0851086	CG33082	protein_coding	GO:0005655|GO:0008033|GO:0001682|GO:0030681|GO:0004526|GO:0090502|GO:0090501|GO:0005655|GO:0008033|GO:0001682|GO:0030681|GO:0004526|GO:0046872|GO:0016491|GO:0055114|GO:0005739|GO:0090502|GO:0090501|GO:0051213|GO:0045329	nucleolar ribonuclease P complex|tRNA processing|tRNA 5'-leader removal|multimeric ribonuclease P complex|ribonuclease P activity|RNA phosphodiester bond hydrolysis, endonucleolytic|RNA phosphodiester bond hydrolysis|nucleolar ribonuclease P complex|tRNA processing|tRNA 5'-leader removal|multimeric ribonuclease P complex|ribonuclease P activity|metal ion binding|oxidoreductase activity|oxidation-…	-	Ribonuclease P/MRP subunit p21	Rpp21	-	-	-	-
FBgn0033853	1712.72	0.339198	0.115713	2.93138	0.0033746	0.0854405	CG6145	protein_coding	GO:0005634|GO:0005737|GO:0003951|GO:0006741|GO:0016740|GO:0016310|GO:0005634|GO:0005737|GO:0003951|GO:0006741|GO:0016740|GO:0016310|GO:0005634|GO:0005737|GO:0003951|GO:0006741|GO:0016740|GO:0016310|GO:0005634|GO:0005737|GO:0003951|GO:0006741|GO:0016740|GO:0016310|GO:0005634|GO:0005737|GO:0003951|GO:0006741|GO:0016740|GO:0016310	nucleus|cytoplasm|NAD+ kinase activity|NADP biosynthetic process|transferase activity|phosphorylation|nucleus|cytoplasm|NAD+ kinase activity|NADP biosynthetic process|transferase activity|phosphorylation|nucleus|cytoplasm|NAD+ kinase activity|NADP biosynthetic process|transferase activity|phosphorylation|nucleus|cytoplasm|NAD+ kinase activity|NADP biosynthetic process|transferase activity|phospho…	-	-	CG6145	-	-	-	-
FBgn0038258	1210.8	-0.303764	0.103681	-2.92979	0.00339196	0.0856816	CG7362	protein_coding	GO:0005737|GO:0003824|GO:0006096|GO:0000287|GO:0032869|GO:0030955|GO:0004743|GO:0000166|GO:0005524|GO:0016301|GO:0016740|GO:0016310|GO:0046872	cytoplasm|catalytic activity|glycolytic process|magnesium ion binding|cellular response to insulin stimulus|potassium ion binding|pyruvate kinase activity|nucleotide binding|ATP binding|kinase activity|transferase activity|phosphorylation|metal ion binding	Insufficient genetic data for FlyBase to solicit a summary. [Date last reviewed: 2016-06-30]	-	CG7362	-	-	-	-
FBgn0038609	93.3074	0.554172	0.189194	2.92912	0.00339918	0.0856816	Nup43	protein_coding	GO:0000278|GO:0031080|GO:0003674|GO:0005515	mitotic cell cycle|nuclear pore outer ring|molecular_function|protein binding	Insufficient genetic data for FlyBase to solicit a summary. [Date last reviewed: 2016-06-30]	Nucleoporin 43kD	Nup43	-	-	-	-
FBgn0266069	59.896	-0.700522	0.239173	-2.92894	0.00340124	0.0856816	lncRNA:CR44822	ncRNA			-	long non-coding RNA:CR44822	lncRNA:CR44822	-	-	-	-
FBgn0037788	937.017	-0.407149	0.139109	-2.92683	0.00342435	0.0859878	CAH7	protein_coding	GO:0008270|GO:0004089|GO:0005886|GO:0046872|GO:0016829|GO:0006730|GO:0016836|GO:0008270|GO:0004089|GO:0005886|GO:0046872|GO:0016829|GO:0006730|GO:0016836|GO:0008270|GO:0004089|GO:0005886|GO:0046872|GO:0016829|GO:0006730|GO:0016836	zinc ion binding|carbonate dehydratase activity|plasma membrane|metal ion binding|lyase activity|one-carbon metabolic process|hydro-lyase activity|zinc ion binding|carbonate dehydratase activity|plasma membrane|metal ion binding|lyase activity|one-carbon metabolic process|hydro-lyase activity|zinc ion binding|carbonate dehydratase activity|plasma membrane|metal ion binding|lyase activity|one-carb…	-	Carbonic anhydrase 7	CAH7	-	-	-	-
FBgn0266643	10.3508	2.17992	0.744817	2.92679	0.00342485	0.0859878	lncRNA:CR45150	ncRNA			-	long non-coding RNA:CR45150	lncRNA:CR45150	-	-	-	-
FBgn0053100	1130.48	0.296246	0.101275	2.92516	0.00344282	0.0862947	eIF4EHP	protein_coding	GO:0045998|GO:0016281|GO:0003743|GO:0000340|GO:0003723|GO:0006413|GO:0017148|GO:0030371|GO:0005515|GO:0006412|GO:0045998|GO:0016281|GO:0003743|GO:0000340|GO:0003723|GO:0006413|GO:0017148|GO:0030371|GO:0005515|GO:0006412|GO:0045998|GO:0016281|GO:0003743|GO:0000340|GO:0003723|GO:0006413|GO:0017148|GO:0030371|GO:0005515|GO:0006412|GO:0045998|GO:0016281|GO:0003743|GO:0000340|GO:0003723|GO:0006413|GO:…	positive regulation of ecdysteroid biosynthetic process|eukaryotic translation initiation factor 4F complex|translation initiation factor activity|RNA 7-methylguanosine cap binding|RNA binding|translational initiation|negative regulation of translation|translation repressor activity|protein binding|translation|positive regulation of ecdysteroid biosynthetic process|eukaryotic translation initiati…	eukaryotic translation initiation factor 4E homologous protein (eIF4EHP) encodes a protein that binds the 7-methyl-guanosine cap structure of mRNA and functions as a negative regulator of translation. The product of eIF4EHP contributes to embryonic patterning by negatively regulating translation of the products of cad and hb, and is also implicated in regulating ecdysone biosynthesis. [Date last …	eukaryotic translation initiation factor 4E homologous protein	eIF4EHP	-	-	-	-
FBgn0083975	159.8	0.605645	0.207091	2.92454	0.00344963	0.0863214	Nlg4	protein_coding	GO:0009986|GO:0005887|GO:0098793|GO:0080030|GO:0038023|GO:0045202|GO:0030431|GO:0051932|GO:0007158|GO:0050804|GO:0097104|GO:0042043|GO:0048488|GO:0097105|GO:0016020|GO:0016021|GO:0007268|GO:0009986|GO:0005887|GO:0098793|GO:0080030|GO:0038023|GO:0045202|GO:0030431|GO:0051932|GO:0007158|GO:0050804|GO:0097104|GO:0042043|GO:0048488|GO:0097105|GO:0016020|GO:0016021|GO:0007268|GO:0009986|GO:0005887|GO:…	cell surface|integral component of plasma membrane|presynapse|methyl indole-3-acetate esterase activity|signaling receptor activity|synapse|sleep|synaptic transmission, GABAergic|neuron cell-cell adhesion|modulation of chemical synaptic transmission|postsynaptic membrane assembly|neurexin family protein binding|synaptic vesicle endocytosis|presynaptic membrane assembly|membrane|integral component…	Neuroligin 4 (Nlg4) encodes a synaptic adhesion molecule involved in synapse formation and synaptic transmission. [Date last reviewed: 2019-03-14]	Neuroligin 4	Nlg4	-	-	-	-
FBgn0036723	2320.83	-0.26117	0.0893317	-2.9236	0.00346013	0.0864399	CG12229	protein_coding	GO:0005737|GO:0005829|GO:0006096|GO:0000287|GO:0032869|GO:0030955|GO:0004743|GO:0042866|GO:0016740	cytoplasm|cytosol|glycolytic process|magnesium ion binding|cellular response to insulin stimulus|potassium ion binding|pyruvate kinase activity|pyruvate biosynthetic process|transferase activity	Insufficient genetic data for FlyBase to solicit a summary. [Date last reviewed: 2016-06-30]	-	CG12229	-	-	-	-
FBgn0039483	470.009	0.30983	0.106028	2.92216	0.00347617	0.0866963	CG14259	protein_coding	GO:0005615|GO:0003674	extracellular space|molecular_function	Insufficient genetic data for FlyBase to solicit a summary. [Date last reviewed: 2016-06-30]	-	CG14259	-	-	-	-
FBgn0033250	1184.67	0.313921	0.107499	2.92023	0.00349776	0.0870552	CG14762	protein_coding	GO:0005515|GO:0005515	protein binding|protein binding	Insufficient genetic data for FlyBase to solicit a summary. [Date last reviewed: 2016-06-30]	-	CG14762	-	-	-	-
FBgn0032315	31.3082	-0.949111	0.325056	-2.91984	0.00350215	0.0870552	CG14069	protein_coding	GO:0007165|GO:0005125|GO:0005575|GO:0007165|GO:0005125|GO:0005575	signal transduction|cytokine activity|cellular_component|signal transduction|cytokine activity|cellular_component	Insufficient genetic data for FlyBase to solicit a summary. [Date last reviewed: 2016-06-30]	-	CG14069	-	-	-	-
FBgn0261840	69.5379	0.643612	0.220489	2.91901	0.00351141	0.0871411	pre-mod(mdg4)-X	protein_coding	GO:0003674|GO:0008150|GO:0005575|GO:0003674|GO:0008150|GO:0005575	molecular_function|biological_process|cellular_component|molecular_function|biological_process|cellular_component	Insufficient genetic data for FlyBase to solicit a summary. [Date last reviewed: 2016-10-13]	-	pre-mod(mdg4)-X	-	-	-	-
FBgn0029795	49.5994	-0.74614	0.255713	-2.91788	0.00352418	0.0873135	CG15773	protein_coding			Insufficient genetic data for FlyBase to solicit a summary. [Date last reviewed: 2016-06-30]	-	CG15773	-	-	-	-
FBgn0266788	76.2477	0.632944	0.217016	2.91657	0.00353901	0.0875365	lncRNA:CR45253	ncRNA			-	long non-coding RNA:CR45253	lncRNA:CR45253	-	-	-	-
FBgn0031476	1914.52	-0.274851	0.0942905	-2.91494	0.00355755	0.0877701	CG8813	protein_coding			Insufficient genetic data for FlyBase to solicit a summary. [Date last reviewed: 2016-06-30]	-	CG8813	-	-	-	-
FBgn0043791	85.0884	-1.14087	0.391418	-2.91471	0.00356014	0.0877701	phu	protein_coding	GO:0009986|GO:0003824|GO:0001666|GO:0016311|GO:0016791|GO:0035094|GO:0004035|GO:0016787	cell surface|catalytic activity|response to hypoxia|dephosphorylation|phosphatase activity|response to nicotine|alkaline phosphatase activity|hydrolase activity	Insufficient genetic data for FlyBase to solicit a summary. [Date last reviewed: 2016-06-30]	phurba tashi	phu	-	-	-	-
FBgn0038420	691.185	0.290408	0.0996568	2.91408	0.00356736	0.0878037	CG10311	protein_coding	GO:0016021|GO:0016020|GO:0016021|GO:0016020	integral component of membrane|membrane|integral component of membrane|membrane	-	-	CG10311	-	-	-	-
FBgn0016693	1963.92	0.235584	0.0809437	2.91046	0.00360895	0.0886821	Past1	protein_coding	GO:0032456|GO:0005509|GO:0048477|GO:0007474|GO:0005525|GO:0006897|GO:0007291|GO:0008587|GO:0071212|GO:1990255|GO:0016020|GO:0000166|GO:0005524|GO:0048471|GO:0005886|GO:0043231|GO:0005768|GO:0072659|GO:0030139|GO:0060271|GO:0016197|GO:0005769|GO:0055038|GO:0010008|GO:0005515|GO:0032456|GO:0005509|GO:0048477|GO:0007474|GO:0005525|GO:0006897|GO:0007291|GO:0008587|GO:0071212|GO:0045466|GO:1990255|GO:…	endocytic recycling|calcium ion binding|oogenesis|imaginal disc-derived wing vein specification|GTP binding|endocytosis|sperm individualization|imaginal disc-derived wing margin morphogenesis|subsynaptic reticulum|subsynaptic reticulum organization|membrane|nucleotide binding|ATP binding|perinuclear region of cytoplasm|plasma membrane|intracellular membrane-bounded organelle|endosome|protein loca…	Putative Achaete Scute Target 1 (Past1) encodes a protein that associates predominantly with the plasma membrane and genetically interacts with N. It contributes to endocytosis, male sterility, temperature sensitivity, life span and differentiation of photoreceptors R1/R6/R7 and cone cells. [Date last reviewed: 2019-03-14]	Putative Achaete Scute Target 1	Past1	-	-	-	-
FBgn0266448	4361.88	0.197941	0.0680248	2.90984	0.00361618	0.0887145	CG45078	protein_coding	GO:0003674|GO:0008150|GO:0005575	molecular_function|biological_process|cellular_component	Insufficient genetic data for FlyBase to solicit a summary. [Date last reviewed: 2016-10-13]	-	CG45078	-	-	-	-
FBgn0045800	134.578	0.518923	0.178456	2.90786	0.00363915	0.0889102	Uhg1	ncRNA			-	U snoRNA host gene 1	Uhg1	-	-	-	-
FBgn0261841	52.0942	0.729329	0.250834	2.90762	0.00364192	0.0889102	pre-mod(mdg4)-AD	protein_coding	GO:0003674|GO:0008150|GO:0005575|GO:0003674|GO:0008150|GO:0005575	molecular_function|biological_process|cellular_component|molecular_function|biological_process|cellular_component	Insufficient genetic data for FlyBase to solicit a summary. [Date last reviewed: 2016-10-13]	-	pre-mod(mdg4)-AD	-	-	-	-
FBgn0261842	52.0942	0.729329	0.250834	2.90762	0.00364192	0.0889102	pre-mod(mdg4)-AE	protein_coding	GO:0003674|GO:0008150|GO:0005575|GO:0003674|GO:0008150|GO:0005575	molecular_function|biological_process|cellular_component|molecular_function|biological_process|cellular_component	Insufficient genetic data for FlyBase to solicit a summary. [Date last reviewed: 2016-10-13]	-	pre-mod(mdg4)-AE	-	-	-	-
FBgn0040097	2672.56	0.327474	0.112694	2.90588	0.00366226	0.0892617	lectin-30A	protein_coding	GO:0030246|GO:0005615|GO:0032504|GO:0005534|GO:0038023	carbohydrate binding|extracellular space|multicellular organism reproduction|galactose binding|signaling receptor activity	Insufficient genetic data for FlyBase to solicit a summary. [Date last reviewed: 2016-06-30]	lectin-30A	lectin-30A	-	-	-	-
FBgn0261839	53.725	0.723062	0.249298	2.90039	0.00372702	0.0906928	pre-mod(mdg4)-Y	protein_coding	GO:0003674|GO:0008150|GO:0005575|GO:0003674|GO:0008150|GO:0005575	molecular_function|biological_process|cellular_component|molecular_function|biological_process|cellular_component	Insufficient genetic data for FlyBase to solicit a summary. [Date last reviewed: 2016-10-13]	-	pre-mod(mdg4)-Y	-	-	-	-
FBgn0263446	10.0946	-1.65741	0.571777	-2.8987	0.00374712	0.0910344	asRNA:CR43469	ncRNA			-	antisense RNA:CR43469	asRNA:CR43469	-	-	-	-
FBgn0038706	3910.72	-0.235126	0.0811421	-2.89771	0.00375903	0.0911763	CG3517	protein_coding	GO:0003674|GO:0008150|GO:0005575	molecular_function|biological_process|cellular_component	Insufficient genetic data for FlyBase to solicit a summary. [Date last reviewed: 2016-06-30]	-	CG3517	-	-	-	-
FBgn0050158	177.648	0.505509	0.174572	2.8957	0.00378316	0.0915167	CG30158	protein_coding	GO:0005886|GO:0007165|GO:0005525|GO:0016020|GO:0003924|GO:0019003|GO:0000166	plasma membrane|signal transduction|GTP binding|membrane|GTPase activity|GDP binding|nucleotide binding	Insufficient genetic data for FlyBase to solicit a summary. [Date last reviewed: 2016-06-30]	-	CG30158	-	-	-	-
FBgn0004197	115.916	-0.678717	0.234418	-2.89533	0.00378761	0.0915167	Ser	protein_coding	GO:0016021|GO:0005509|GO:0007275|GO:0016020|GO:0005112|GO:0007219|GO:0007154|GO:0005886|GO:0007423|GO:0048749|GO:0007480|GO:0008587|GO:0007436|GO:0016324|GO:0030718|GO:0005515|GO:0007476|GO:0045179|GO:0035017|GO:0014009|GO:0016330|GO:0048100|GO:0007435|GO:0009986|GO:0030154|GO:0035167|GO:0048018|GO:0036011|GO:0035214|GO:0035204|GO:0042688|GO:0046331|GO:0043208|GO:0030673|GO:0016021|GO:0005509|GO:…	integral component of membrane|calcium ion binding|multicellular organism development|membrane|Notch binding|Notch signaling pathway|cell communication|plasma membrane|sensory organ development|compound eye development|imaginal disc-derived leg morphogenesis|imaginal disc-derived wing margin morphogenesis|larval salivary gland morphogenesis|apical plasma membrane|germ-line stem cell population ma…	-	Serrate	Ser	Acts as a ligand for Notch (N) receptor. Essential for proper ectodermal development. Serrate represents an element in a network of interacting molecules operating at the cell surface during the differentiation of certain tissues.	-	-	-
FBgn0031462	1463.61	-0.273571	0.0944972	-2.89502	0.00379135	0.0915167	CG2964	protein_coding	GO:0005737|GO:0005886|GO:0003824|GO:0006096|GO:0016301|GO:0000287|GO:0006090|GO:0032869|GO:0030955|GO:0004743|GO:0000166|GO:0005524|GO:0016740|GO:0016310|GO:0046872	cytoplasm|plasma membrane|catalytic activity|glycolytic process|kinase activity|magnesium ion binding|pyruvate metabolic process|cellular response to insulin stimulus|potassium ion binding|pyruvate kinase activity|nucleotide binding|ATP binding|transferase activity|phosphorylation|metal ion binding	Insufficient genetic data for FlyBase to solicit a summary. [Date last reviewed: 2016-06-30]	-	CG2964	-	-	-	-
FBgn0033283	1272.41	-0.301786	0.104354	-2.89193	0.0038288	0.0922721	CG11635	protein_coding			Insufficient genetic data for FlyBase to solicit a summary. [Date last reviewed: 2016-06-30]	-	CG11635	-	-	-	-
FBgn0037683	217.049	0.652787	0.226282	2.88483	0.00391622	0.0942277	CG18473	protein_coding	GO:0008270|GO:0016788|GO:0009056|GO:0005575|GO:0016787|GO:0046872|GO:0008150	zinc ion binding|hydrolase activity, acting on ester bonds|catabolic process|cellular_component|hydrolase activity|metal ion binding|biological_process	Insufficient genetic data for FlyBase to solicit a summary. [Date last reviewed: 2016-06-30]	-	CG18473	-	Belongs to the metallo-dependent hydrolases superfamily. Phosphotriesterase family.	-	-
FBgn0037974	113.323	1.19605	0.414723	2.88397	0.00392693	0.0943342	CG12224	protein_coding	GO:0016491|GO:0055114|GO:0005829	oxidoreductase activity|oxidation-reduction process|cytosol	Insufficient genetic data for FlyBase to solicit a summary. [Date last reviewed: 2016-06-30]	-	CG12224	-	-	-	-
FBgn0261561	2462.83	-0.235682	0.0817362	-2.88344	0.00393352	0.0943417	CG42675	protein_coding	GO:0003674|GO:0008150|GO:0005575|GO:0003674|GO:0008150|GO:0005575|GO:0003674|GO:0008150|GO:0005575|GO:0003674|GO:0008150|GO:0005575|GO:0003674|GO:0008150|GO:0005575|GO:0003674|GO:0008150|GO:0005575	molecular_function|biological_process|cellular_component|molecular_function|biological_process|cellular_component|molecular_function|biological_process|cellular_component|molecular_function|biological_process|cellular_component|molecular_function|biological_process|cellular_component|molecular_function|biological_process|cellular_component	Insufficient genetic data for FlyBase to solicit a summary. [Date last reviewed: 2016-06-30]	-	CG42675	-	-	-	-
FBgn0265080	19.9003	1.12961	0.392077	2.8811	0.00396291	0.0948949	lncRNA:CR44191	ncRNA			-	long non-coding RNA:CR44191	lncRNA:CR44191	-	-	-	-
FBgn0039071	3529.63	-0.280814	0.0975193	-2.87958	0.00398209	0.0952024	bb8	protein_coding	GO:0055114|GO:0000166|GO:0005739|GO:0007283|GO:0005759|GO:0016491|GO:0007005|GO:0006520|GO:0004353|GO:0019551|GO:0016639|GO:0004352|GO:0006538|GO:0090258|GO:0004354	oxidation-reduction process|nucleotide binding|mitochondrion|spermatogenesis|mitochondrial matrix|oxidoreductase activity|mitochondrion organization|cellular amino acid metabolic process|glutamate dehydrogenase [NAD(P)+] activity|glutamate catabolic process to 2-oxoglutarate|oxidoreductase activity, acting on the CH-NH2 group of donors, NAD or NADP as acceptor|glutamate dehydrogenase (NAD+) activ…	big bubble 8 (bb8) encodes a glutamate dehydrogenase involved in the development of the spermatid mitochondria. [Date last reviewed: 2019-09-19]	big bubble 8	bb8	-	-	-	-
FBgn0265922	19.5378	1.32074	0.459056	2.87707	0.00401385	0.0958091	lncRNA:CR44711	ncRNA			-	long non-coding RNA:CR44711	lncRNA:CR44711	-	-	-	-
FBgn0053281	508.465	0.29005	0.100879	2.87524	0.00403727	0.0961341	CG33281	protein_coding	GO:0016021|GO:0005887|GO:0055085|GO:0005351|GO:0022857|GO:0016020	integral component of membrane|integral component of plasma membrane|transmembrane transport|carbohydrate:proton symporter activity|transmembrane transporter activity|membrane	Insufficient genetic data for FlyBase to solicit a summary. [Date last reviewed: 2016-06-30]	-	CG33281	-	-	-	-
FBgn0035713	2067.27	-0.328079	0.114114	-2.875	0.00404027	0.0961341	velo	protein_coding	GO:0005634|GO:0005737|GO:0006508|GO:0007411|GO:0016926|GO:0070140|GO:0008234|GO:0060548|GO:0060997|GO:0021952|GO:0070139|GO:0005634|GO:0005737|GO:0006508|GO:0007411|GO:0016926|GO:0070140|GO:0008234|GO:0060548|GO:0060997|GO:0021952|GO:0070139|GO:0005634|GO:0005737|GO:0006508|GO:0007411|GO:0016926|GO:0070140|GO:0008234|GO:0060548|GO:0060997|GO:0021952|GO:0070139|GO:0005634|GO:0005737|GO:0006508|GO:…	nucleus|cytoplasm|proteolysis|axon guidance|protein desumoylation|SUMO-specific isopeptidase activity|cysteine-type peptidase activity|negative regulation of cell death|dendritic spine morphogenesis|central nervous system projection neuron axonogenesis|SUMO-specific endopeptidase activity|nucleus|cytoplasm|proteolysis|axon guidance|protein desumoylation|SUMO-specific isopeptidase activity|cystein…	veloren (velo) encodes a SUMO protease that is required for dendrite and axon targeting of olfactory projection neurons. [Date last reviewed: 2018-10-18]	veloren	velo	-	-	-	-
FBgn0028939	54.1306	0.812916	0.282837	2.87415	0.00405116	0.0962407	NimC2	protein_coding	GO:0016021|GO:0006909|GO:0016020|GO:0003674|GO:0016021|GO:0006909|GO:0016020|GO:0003674|GO:0016021|GO:0006909|GO:0016020|GO:0003674	integral component of membrane|phagocytosis|membrane|molecular_function|integral component of membrane|phagocytosis|membrane|molecular_function|integral component of membrane|phagocytosis|membrane|molecular_function	Insufficient genetic data for FlyBase to solicit a summary. [Date last reviewed: 2016-06-30]	Nimrod C2	NimC2	-	-	-	-
FBgn0051115	557.642	-0.325173	0.113162	-2.87352	0.00405921	0.0962795	CG31115	protein_coding	GO:0005634|GO:0005737|GO:0005829|GO:0003824|GO:0009116|GO:0006166|GO:0019509|GO:0017061|GO:0016740|GO:0016757|GO:0004731|GO:0016763	nucleus|cytoplasm|cytosol|catalytic activity|nucleoside metabolic process|purine ribonucleoside salvage|L-methionine salvage from methylthioadenosine|S-methyl-5-thioadenosine phosphorylase activity|transferase activity|transferase activity, transferring glycosyl groups|purine-nucleoside phosphorylase activity|transferase activity, transferring pentosyl groups	-	-	CG31115	Purine nucleoside phosphorylase involved in purine salvage.	Belongs to the PNP/MTAP phosphorylase family. MTAP subfamily.	Homotrimer.	Purine metabolism; purine nucleoside salvage.
FBgn0015623	15072.8	0.260662	0.09077	2.87167	0.00408304	0.096632	Cpr	protein_coding	GO:0016021|GO:0055114|GO:0005789|GO:0005829|GO:0012505|GO:0016491|GO:0050660|GO:0006723|GO:0050661|GO:0009725|GO:0003958|GO:0010181|GO:0016020|GO:0005783|GO:0005737|GO:0016709|GO:0055114|GO:0016491|GO:0003958|GO:0010181|GO:0016021|GO:0055114|GO:0005789|GO:0005829|GO:0012505|GO:0016491|GO:0050660|GO:0006723|GO:0050661|GO:0009725|GO:0003958|GO:0010181|GO:0016020|GO:0005783|GO:0005737|GO:0016709|GO:…	integral component of membrane|oxidation-reduction process|endoplasmic reticulum membrane|cytosol|endomembrane system|oxidoreductase activity|flavin adenine dinucleotide binding|cuticle hydrocarbon biosynthetic process|NADP binding|response to hormone|NADPH-hemoprotein reductase activity|FMN binding|membrane|endoplasmic reticulum|cytoplasm|oxidoreductase activity, acting on paired donors, with in…	-	Cytochrome P450 reductase	Cpr	This enzyme is required for electron transfer from NADP to cytochrome p450 in microsomes. It can also provide electron transfer to heme oxygenase and cytochrome b5 (By similarity). May function to clear the olfactory organ (antennae) from accumulating chemicals.	Belongs to the NADPH--cytochrome P450 reductase family.	-	-
FBgn0038820	6062.32	0.332856	0.115939	2.87097	0.0040922	0.096632	CG4000	protein_coding			Insufficient genetic data for FlyBase to solicit a summary. [Date last reviewed: 2016-06-30]	-	CG4000	-	-	-	-
FBgn0032471	2552.16	-0.328686	0.11449	-2.87087	0.00409338	0.096632	CG5122	protein_coding	GO:0005777|GO:0004092|GO:0019254|GO:0016746|GO:0016740	peroxisome|carnitine O-acetyltransferase activity|carnitine metabolic process, CoA-linked|transferase activity, transferring acyl groups|transferase activity	-	-	CG5122	-	-	-	-
FBgn0265272	234.072	-0.4352	0.151644	-2.86987	0.00410641	0.0967875	CG30060	protein_coding	GO:0003674|GO:0008150|GO:0005575	molecular_function|biological_process|cellular_component	Insufficient genetic data for FlyBase to solicit a summary. [Date last reviewed: 2017-07-13]	-	CG30060	-	-	-	-
FBgn0051206	1596.86	-0.250141	0.0872039	-2.86846	0.00412476	0.0969807	CG31206	protein_coding	GO:0003674|GO:0008150|GO:0005575|GO:0003674|GO:0008150|GO:0005575	molecular_function|biological_process|cellular_component|molecular_function|biological_process|cellular_component	Insufficient genetic data for FlyBase to solicit a summary. [Date last reviewed: 2016-10-13]	-	CG31206	-	-	-	-
FBgn0030013	335.215	0.493408	0.172024	2.86825	0.00412753	0.0969807	GIIIspla2	protein_coding	GO:0005576|GO:0006644|GO:0004623|GO:0050482|GO:0102568|GO:0102567|GO:0016787|GO:0046872|GO:0006629|GO:0016042|GO:0047498|GO:0005576|GO:0006644|GO:0004623|GO:0050482|GO:0102568|GO:0102567|GO:0016787|GO:0046872|GO:0006629|GO:0016042|GO:0047498	extracellular region|phospholipid metabolic process|phospholipase A2 activity|arachidonic acid secretion|phospholipase A2 activity consuming 1,2-dioleoylphosphatidylethanolamine)|phospholipase A2 activity (consuming 1,2-dipalmitoylphosphatidylcholine)|hydrolase activity|metal ion binding|lipid metabolic process|lipid catabolic process|calcium-dependent phospholipase A2 activity|extracellular regi…	-	Phospholipase A2 group III	GIIIspla2	-	-	-	-
FBgn0263973	544.827	0.287487	0.100284	2.86672	0.00414744	0.0972964	jv	protein_coding	GO:0005737|GO:0005856|GO:0030046|GO:0008407|GO:0007275|GO:0032432	cytoplasm|cytoskeleton|parallel actin filament bundle assembly|chaeta morphogenesis|multicellular organism development|actin filament bundle	javelin (jv) encodes an actin associated protein with roles in actin organization during bristle growth. [Date last reviewed: 2019-03-07]	javelin	jv	Important for normal assembly of actin bundles during bristle formation.	-	-	-
FBgn0017448	513.01	0.45338	0.158257	2.86484	0.0041722	0.0977246	CG2187	protein_coding	GO:0016021|GO:0055085|GO:0016020|GO:0022857|GO:0015293|GO:0006814|GO:0016021|GO:0055085|GO:0016020|GO:0022857|GO:0015293|GO:0006814	integral component of membrane|transmembrane transport|membrane|transmembrane transporter activity|symporter activity|sodium ion transport|integral component of membrane|transmembrane transport|membrane|transmembrane transporter activity|symporter activity|sodium ion transport	Insufficient genetic data for FlyBase to solicit a summary. [Date last reviewed: 2016-06-30]	-	CG2187	-	-	-	-
FBgn0263094	21.7818	1.09623	0.382728	2.86425	0.00417995	0.0977534	CG43362	protein_coding	GO:0003674|GO:0008150|GO:0005575	molecular_function|biological_process|cellular_component	Insufficient genetic data for FlyBase to solicit a summary. [Date last reviewed: 2016-10-13]	-	CG43362	-	-	-	-
FBgn0028550	1452.96	-0.598514	0.209012	-2.86353	0.00418948	0.0978239	Atf3	protein_coding	GO:0003677|GO:0005634|GO:0003700|GO:0006955|GO:0006357|GO:0007399|GO:0006355|GO:0055088|GO:0043565|GO:0000978|GO:0010883|GO:0005515|GO:0000981|GO:0003677|GO:0003700|GO:0006357|GO:0006355|GO:0005634|GO:0003677|GO:0005634|GO:0003700|GO:0006955|GO:0006357|GO:0007399|GO:0006355|GO:0055088|GO:0043565|GO:0000978|GO:0010883|GO:0005515|GO:0000981	DNA binding|nucleus|DNA-binding transcription factor activity|immune response|regulation of transcription by RNA polymerase II|nervous system development|regulation of transcription, DNA-templated|lipid homeostasis|sequence-specific DNA binding|RNA polymerase II cis-regulatory region sequence-specific DNA binding|regulation of lipid storage|protein binding|DNA-binding transcription factor activit…	Activating transcription factor 3 (Atf3) encodes a transcription factor whose levels are tightly controlled during development. It forms homodimers or heterodimerizes with the product of Jra. It contributes to abdominal morphogenesis, and immune system and metabolic homeostasis. [Date last reviewed: 2019-03-07]	Activating transcription factor 3	Atf3	Transcription factor which binds to the cAMP response element (CRE) (PubMed:20023169). Regulates metabolic and innate immune homeostasis, possibly by controlling appropriate expression of genes involved in peritrophic matrix composition and ensuring the normal digestive and immune function of the gut (PubMed:22851689). Required for the expression of odorant receptors Or43b and Or47b (PubMed:26848…	Belongs to the bZIP family. ATF subfamily.	Interacts with Jra/jun; the interaction enhances the DNA-binding activity of Atf3.	-
FBgn0028504	707.156	-0.276962	0.0967482	-2.86271	0.00420034	0.0979254	CG12182	protein_coding	GO:0003674|GO:0008150|GO:0005575|GO:0005515|GO:0003674|GO:0008150|GO:0005575|GO:0005515|GO:0003674|GO:0008150|GO:0005575|GO:0005515	molecular_function|biological_process|cellular_component|protein binding|molecular_function|biological_process|cellular_component|protein binding|molecular_function|biological_process|cellular_component|protein binding	Insufficient genetic data for FlyBase to solicit a summary. [Date last reviewed: 2016-10-13]	-	CG12182	-	-	-	-
FBgn0259952	6108.8	0.292086	0.102054	2.86206	0.00420895	0.0979738	Sfp24Bb	protein_coding	GO:0005615|GO:0032504|GO:0004867|GO:0003674|GO:0010951|GO:0030414|GO:0010466	extracellular space|multicellular organism reproduction|serine-type endopeptidase inhibitor activity|molecular_function|negative regulation of endopeptidase activity|peptidase inhibitor activity|negative regulation of peptidase activity	-	Seminal fluid protein 24Bb	Sfp24Bb	-	-	-	-
FBgn0031853	3662.81	-0.24996	0.0873624	-2.86119	0.0042206	0.0980929	TTLL3B	protein_coding	GO:0005634|GO:0005524|GO:0007283|GO:0005874|GO:0015630|GO:0060271|GO:0005930|GO:0007291|GO:0018094|GO:0070735|GO:0006464|GO:0035082|GO:0070736|GO:0070737|GO:0000166|GO:0016874|GO:0005737|GO:0005856|GO:0030154	nucleus|ATP binding|spermatogenesis|microtubule|microtubule cytoskeleton|cilium assembly|axoneme|sperm individualization|protein polyglycylation|protein-glycine ligase activity|cellular protein modification process|axoneme assembly|protein-glycine ligase activity, initiating|protein-glycine ligase activity, elongating|nucleotide binding|ligase activity|cytoplasm|cytoskeleton|cell differentiation	-	Tubulin tyrosine ligase-like 3B	TTLL3B	Essential glycylase which modifies both tubulin and non-tubulin proteins, generating side chains of glycine on the gamma-carboxyl groups of specific glutamate residues of target proteins. Monoglycylates alpha-tubulin by adding a single glycine chain to generate monoglycine side chains, but is not involved in elongation step to generate polyglycine side chains on alpha-tubulin. Has the ability to …	-	-	-
FBgn0000241	76.5543	0.644711	0.225589	2.8579	0.00426453	0.0989609	bw	protein_coding	GO:0016021|GO:0005524|GO:0016887|GO:0005886|GO:0055085|GO:0098793|GO:0042626|GO:0016020|GO:0006727|GO:0007605|GO:0031409|GO:0005275|GO:0006856|GO:0015842|GO:0000166|GO:0016787|GO:0016021|GO:0005524|GO:0016887|GO:0005886|GO:0055085|GO:0098793|GO:0042626|GO:0016020|GO:0006727|GO:0007605|GO:0031409|GO:0005275|GO:0006856|GO:0015842|GO:0000166|GO:0016787	integral component of membrane|ATP binding|ATPase activity|plasma membrane|transmembrane transport|presynapse|ATPase-coupled transmembrane transporter activity|membrane|ommochrome biosynthetic process|sensory perception of sound|pigment binding|amine transmembrane transporter activity|eye pigment precursor transport|aminergic neurotransmitter loading into synaptic vesicle|nucleotide binding|hydro…	brown (bw) encodes a member of the traffic ATPase (or ABC) family of membrane transporters. It is believed to heterodimerize with the product of w. bw and w are necessary to import guanine, a precursor for the red pteridine pigments, into pigment cells of the eyes, Malpighian tubules and testis sheath. [Date last reviewed: 2019-03-07]	brown	bw	Part of a membrane-spanning permease system necessary for the transport of pigment precursors into pigment cells responsible for eye color. Brown and white dimerize for the transport of guanine.	Belongs to the ABC transporter superfamily. ABCG family. Eye pigment precursor importer (TC 3.A.1.204) subfamily.	Heterodimer of brown with white.	-
FBgn0034140	1381.64	-0.389325	0.13628	-2.8568	0.00427939	0.0991523	Lst	protein_coding	GO:0009267|GO:0070328|GO:0042593|GO:0090278|GO:0050848|GO:0071322|GO:0009267|GO:0070328|GO:0042593|GO:0090278|GO:0050848|GO:0071322|GO:0009267|GO:0070328|GO:0042593|GO:0090278|GO:0050848|GO:0071322	cellular response to starvation|triglyceride homeostasis|glucose homeostasis|negative regulation of peptide hormone secretion|regulation of calcium-mediated signaling|cellular response to carbohydrate stimulus|cellular response to starvation|triglyceride homeostasis|glucose homeostasis|negative regulation of peptide hormone secretion|regulation of calcium-mediated signaling|cellular response to c…	Limostatin (Lst) encodes a peptide hormone produced by endocrine corpora cardiaca cells during starvation. It suppresses insulin production and secretion from insulin-producing cells by signaling through the G-protein coupled receptor encoded by PK1-R. [Date last reviewed: 2019-03-14]	Limostatin	Lst	-	-	-	-
FBgn0039087	19.9864	-1.20901	0.423286	-2.85626	0.00428665	0.0991675	Ugt303B2	protein_coding	GO:0016021|GO:0016758|GO:0008194|GO:0043231|GO:0015020|GO:0016020|GO:0016740|GO:0016757	integral component of membrane|transferase activity, transferring hexosyl groups|UDP-glycosyltransferase activity|intracellular membrane-bounded organelle|glucuronosyltransferase activity|membrane|transferase activity|transferase activity, transferring glycosyl groups	-	UDP-glycosyltransferase family 303 member B2	Ugt303B2	-	-	-	-
FBgn0036321	519.207	0.584848	0.20483	2.85528	0.00429982	0.0993072	CG14120	protein_coding	GO:0046872|GO:0003676|GO:0005739|GO:0005743|GO:0016787|GO:0006309|GO:0004521|GO:0004519|GO:0000014|GO:0004529|GO:0000737|GO:0005634|GO:0090502|GO:0004518	metal ion binding|nucleic acid binding|mitochondrion|mitochondrial inner membrane|hydrolase activity|apoptotic DNA fragmentation|endoribonuclease activity|endonuclease activity|single-stranded DNA endodeoxyribonuclease activity|exodeoxyribonuclease activity|DNA catabolic process, endonucleolytic|nucleus|RNA phosphodiester bond hydrolysis, endonucleolytic|nuclease activity	Insufficient genetic data for FlyBase to solicit a summary. [Date last reviewed: 2016-06-30]	-	CG14120	-	-	-	-
FBgn0052445	2866.1	-0.271399	0.0950666	-2.85484	0.00430591	0.0993072	CG32445	protein_coding	GO:0030246|GO:0003824|GO:0016853|GO:0005975|GO:0006006|GO:0004034|GO:0033499|GO:0019318	carbohydrate binding|catalytic activity|isomerase activity|carbohydrate metabolic process|glucose metabolic process|aldose 1-epimerase activity|galactose catabolic process via UDP-galactose|hexose metabolic process	Insufficient genetic data for FlyBase to solicit a summary. [Date last reviewed: 2016-06-30]	-	CG32445	-	-	-	-
FBgn0029826	151.166	-0.53004	0.185784	-2.853	0.00433092	0.0997307	CG6041	protein_coding	GO:0006508|GO:0004252|GO:0008236|GO:0016787	proteolysis|serine-type endopeptidase activity|serine-type peptidase activity|hydrolase activity	-	-	CG6041	-	-	-	-
FBgn0032122	5798.96	0.309113	0.108455	2.85015	0.00436981	0.100472	CG31883	protein_coding	GO:0005615|GO:0032504|GO:0003674	extracellular space|multicellular organism reproduction|molecular_function	Insufficient genetic data for FlyBase to solicit a summary. [Date last reviewed: 2016-06-30]	-	CG31883	-	-	-	-
FBgn0020616	275.549	0.359037	0.126024	2.84897	0.00438616	0.100694	SA	protein_coding	GO:0005634|GO:0003682|GO:0000780|GO:0016322|GO:0035327|GO:0000785|GO:0007130|GO:0007062|GO:0000922|GO:0034990|GO:0008278|GO:0005721|GO:0007064	nucleus|chromatin binding|condensed nuclear chromosome, centromeric region|neuron remodeling|transcriptionally active chromatin|chromatin|synaptonemal complex assembly|sister chromatid cohesion|spindle pole|nuclear mitotic cohesin complex|cohesin complex|pericentric heterochromatin|mitotic sister chromatid cohesion	Stromalin (SA) encodes a subunit of the cohesin ring complex, which encircles sister chromatids after DNA replication and has multiple roles in the regulation of gene expression and DNA repair. [Date last reviewed: 2019-03-14]	Stromalin	SA	-	-	-	-
FBgn0052073	20.0744	-1.17703	0.413557	-2.84611	0.0044257	0.101447	CG32073	protein_coding	GO:0003674|GO:0008150|GO:0005575|GO:0003674|GO:0008150|GO:0005575	molecular_function|biological_process|cellular_component|molecular_function|biological_process|cellular_component	Insufficient genetic data for FlyBase to solicit a summary. [Date last reviewed: 2016-06-30]	-	CG32073	-	-	-	-
FBgn0085232	102.363	0.574389	0.202015	2.8433	0.00446486	0.102188	CG34203	protein_coding	GO:0003674|GO:0008150|GO:0005575	molecular_function|biological_process|cellular_component	Insufficient genetic data for FlyBase to solicit a summary. [Date last reviewed: 2016-10-13]	-	CG34203	-	-	-	-
FBgn0011581	428.438	0.38812	0.136621	2.84085	0.00449928	0.102819	Ms	protein_coding	GO:0005615|GO:0005184|GO:0007218|GO:0008344|GO:0045822|GO:0010459|GO:0071855|GO:0045986|GO:0060457|GO:0005576|GO:0005615|GO:0005184|GO:0007218|GO:0008344|GO:0045822|GO:0010459|GO:0071855|GO:0045986|GO:0060457|GO:0005576|GO:0005615|GO:0005184|GO:0007218|GO:0008344|GO:0045822|GO:0010459|GO:0071855|GO:0045986|GO:0060457|GO:0005576	extracellular space|neuropeptide hormone activity|neuropeptide signaling pathway|adult locomotory behavior|negative regulation of heart contraction|negative regulation of heart rate|neuropeptide receptor binding|negative regulation of smooth muscle contraction|negative regulation of digestive system process|extracellular region|extracellular space|neuropeptide hormone activity|neuropeptide signal…	Insufficient genetic data for FlyBase to solicit a summary. [Date last reviewed: 2016-06-30]	Myosuppressin	Ms	Myoinhibiting neuropeptide.	Belongs to the myosuppressin family.	-	-
FBgn0025612	327.578	-0.332761	0.117196	-2.83935	0.0045205	0.103147	CG3062	protein_coding	GO:0036064|GO:0044782|GO:0003674|GO:0008150|GO:0005575	ciliary basal body|cilium organization|molecular_function|biological_process|cellular_component	Insufficient genetic data for FlyBase to solicit a summary. [Date last reviewed: 2017-07-13]	-	CG3062	-	Belongs to the Flattop family.	-	-
FBgn0001404	1620.59	-0.274943	0.0969658	-2.83546	0.00457593	0.104253	egh	protein_coding	GO:0016021|GO:0005737|GO:0008049|GO:0007411|GO:0048935|GO:0007298|GO:0007281|GO:0030707|GO:0033227|GO:0045434|GO:0045165|GO:0007293|GO:0016325|GO:0046662|GO:0007299|GO:0016333|GO:0030720|GO:0001744|GO:0006688|GO:0042248|GO:0019187|GO:0016020|GO:0016740|GO:0016757|GO:0007275|GO:0097502|GO:0016021|GO:0005737|GO:0008049|GO:0007411|GO:0048935|GO:0007298|GO:0007281|GO:0030707|GO:0033227|GO:0045434|GO:…	integral component of membrane|cytoplasm|male courtship behavior|axon guidance|peripheral nervous system neuron development|border follicle cell migration|germ cell development|ovarian follicle cell development|dsRNA transport|negative regulation of female receptivity, post-mating|cell fate commitment|germarium-derived egg chamber formation|oocyte microtubule cytoskeleton organization|regulation …	-	egghead	egh	Glycosyltransferase with a proposed role in glycosphingolipid biosynthesis. Neurogenic protein implicated in epithelial development. Critical component of a differential oocyte-follicle cell adhesive system.	Belongs to the glycosyltransferase 2 family.	-	-
FBgn0031533	107.699	-0.972195	0.342999	-2.8344	0.00459123	0.104444	CG2772	protein_coding	GO:0016042|GO:0016298|GO:0006629|GO:0044255|GO:0016788|GO:0016787	lipid catabolic process|lipase activity|lipid metabolic process|cellular lipid metabolic process|hydrolase activity, acting on ester bonds|hydrolase activity	Insufficient genetic data for FlyBase to solicit a summary. [Date last reviewed: 2016-06-30]	-	CG2772	-	-	-	-
FBgn0265626	2974.88	-0.326736	0.115396	-2.83143	0.00463405	0.104883	CG44434	protein_coding			Insufficient genetic data for FlyBase to solicit a summary. [Date last reviewed: 2016-06-30]	-	CG44434	-	-	-	-
FBgn0265627	2974.88	-0.326736	0.115396	-2.83143	0.00463405	0.104883	CG44435	protein_coding			Insufficient genetic data for FlyBase to solicit a summary. [Date last reviewed: 2016-06-30]	-	CG44435	-	-	-	-
FBgn0015546	171.095	0.417229	0.147371	2.83114	0.00463817	0.104883	spel1	protein_coding	GO:0003677|GO:0005634|GO:0005524|GO:0016887|GO:0036297|GO:0006310|GO:0045910|GO:0006298|GO:0006301|GO:0000406|GO:0032302|GO:0032301|GO:0043570|GO:0030983|GO:0008094|GO:0042771|GO:0032300|GO:0000166|GO:0006281|GO:0006974|GO:0000400|GO:0032137|GO:0032142|GO:0032143|GO:0032181|GO:0032357|GO:0032405|GO:0003677|GO:0005634|GO:0005524|GO:0016887|GO:0036297|GO:0006310|GO:0045910|GO:0006298|GO:0006301|GO:…	DNA binding|nucleus|ATP binding|ATPase activity|interstrand cross-link repair|DNA recombination|negative regulation of DNA recombination|mismatch repair|postreplication repair|double-strand/single-strand DNA junction binding|MutSbeta complex|MutSalpha complex|maintenance of DNA repeat elements|mismatched DNA binding|DNA-dependent ATPase activity|intrinsic apoptotic signaling pathway in response t…	Insufficient genetic data for FlyBase to solicit a summary. [Date last reviewed: 2016-06-30]	spellchecker1	spel1	Involved in postreplication mismatch repair. Binds specifically to DNA containing mismatched nucleotides thus providing a target for the excision repair processes characteristic of postreplication mismatch repair (By similarity).	Belongs to the DNA mismatch repair MutS family.	Heterodimer of Msh2/Spel and Msh6.	-
FBgn0032276	2629.42	-0.229064	0.0809226	-2.83065	0.00464533	0.104883	CG17098	protein_coding	GO:0003676|GO:0008270|GO:0008150|GO:0005575	nucleic acid binding|zinc ion binding|biological_process|cellular_component
FBgn0263132	191.227	0.687444	0.242858	2.83064	0.00464547	0.104883	Cht6	protein_coding	GO:0005737|GO:0005576|GO:0005975|GO:0008061|GO:0018990|GO:0006032|GO:0004568|GO:0004553|GO:0016787|GO:0008152|GO:0016798|GO:0005737|GO:0005576|GO:0005975|GO:0008061|GO:0018990|GO:0006032|GO:0004568|GO:0004553|GO:0016787|GO:0008152|GO:0016798|GO:0005737|GO:0005576|GO:0005975|GO:0008061|GO:0018990|GO:0006032|GO:0004568|GO:0004553|GO:0016787|GO:0008152|GO:0016798|GO:0005737|GO:0005576|GO:0005975|GO:…	cytoplasm|extracellular region|carbohydrate metabolic process|chitin binding|ecdysis, chitin-based cuticle|chitin catabolic process|chitinase activity|hydrolase activity, hydrolyzing O-glycosyl compounds|hydrolase activity|metabolic process|hydrolase activity, acting on glycosyl bonds|cytoplasm|extracellular region|carbohydrate metabolic process|chitin binding|ecdysis, chitin-based cuticle|chitin…	Chitinase 6 (Cht6) encodes an enzyme involved in ecdysis. [Date last reviewed: 2019-07-11]	Chitinase 6	Cht6	-	-	-	-
FBgn0034824	2730.47	-0.271298	0.0958762	-2.82966	0.00465969	0.105046	Klp59C	protein_coding	GO:0005737|GO:0005524|GO:0016887|GO:0008017|GO:0005813|GO:0003777|GO:0005871|GO:0007018|GO:0005874|GO:0051301|GO:0003774|GO:0000922|GO:0007059|GO:0000777|GO:0005828|GO:0007049|GO:0000166|GO:0005856|GO:0005694|GO:0005819|GO:0000775|GO:0000776	cytoplasm|ATP binding|ATPase activity|microtubule binding|centrosome|microtubule motor activity|kinesin complex|microtubule-based movement|microtubule|cell division|motor activity|spindle pole|chromosome segregation|condensed chromosome kinetochore|kinetochore microtubule|cell cycle|nucleotide binding|cytoskeleton|chromosome|spindle|chromosome, centromeric region|kinetochore	-	Kinesin-like protein at 59C	Klp59C	Required during anaphase to drive sister chromatid separation to actively depolymerize kinetochore microtubules at their kinetochore-associated plus ends, thereby contributing to chromatid mobility through a 'Pac-man' mechanism.	Belongs to the TRAFAC class myosin-kinesin ATPase superfamily. Kinesin family. MCAK/KIF2 subfamily.	-	-
FBgn0040342	130.292	-0.511294	0.18083	-2.82749	0.00469144	0.105603	CG3706	protein_coding			Insufficient genetic data for FlyBase to solicit a summary. [Date last reviewed: 2016-10-13]	-	CG3706	-	-	-	-
FBgn0013725	127.982	-0.593524	0.209962	-2.82682	0.0047013	0.105667	phyl	protein_coding	GO:0005634|GO:0005829|GO:0016360|GO:0035883|GO:0007601|GO:0090090|GO:0010498|GO:0043161|GO:0007423|GO:0000151|GO:0032436|GO:0007219|GO:0008052|GO:0007049|GO:1990756|GO:0045746|GO:0007465|GO:0045500|GO:0007462|GO:0016567|GO:0005515|GO:0050896|GO:0007173	nucleus|cytosol|sensory organ precursor cell fate determination|enteroendocrine cell differentiation|visual perception|negative regulation of canonical Wnt signaling pathway|proteasomal protein catabolic process|proteasome-mediated ubiquitin-dependent protein catabolic process|sensory organ development|ubiquitin ligase complex|positive regulation of proteasomal ubiquitin-dependent protein catabol…	-	phyllopod	phyl	Essential adapter component of E3 ubiquitin ligase complexes; involved in R7 photoreceptor cell differentiation, embryonic nervous system, external sensory organ development and specification of particular muscles. E3 ubiquitin ligase complexes mediate ubiquitination and subsequent proteasomal degradation of target proteins. Required for specification of R7 photoreceptor cell fate in the eye by p…	-	Component of some E3 complex at least composed of sina, ebi and phyl, required for the degradation of ttk.	-
FBgn0033234	213.223	0.51734	0.183205	2.82383	0.00474531	0.106423	MFS12	protein_coding	GO:0016021|GO:0005886|GO:0055085|GO:0022857|GO:0016020|GO:0006820|GO:0016021|GO:0005886|GO:0055085|GO:0022857|GO:0016020|GO:0006820|GO:0016021|GO:0005886|GO:0055085|GO:0022857|GO:0016020|GO:0006820	integral component of membrane|plasma membrane|transmembrane transport|transmembrane transporter activity|membrane|anion transport|integral component of membrane|plasma membrane|transmembrane transport|transmembrane transporter activity|membrane|anion transport|integral component of membrane|plasma membrane|transmembrane transport|transmembrane transporter activity|membrane|anion transport	-	Major Facilitator Superfamily Transporter 12	MFS12	-	-	-	-
FBgn0031568	82.1348	0.792417	0.280667	2.82333	0.00475274	0.106423	CG10019	protein_coding	GO:0016021|GO:0055085|GO:0022857|GO:0016020|GO:0008028|GO:0015718|GO:0016021|GO:0055085|GO:0022857|GO:0016020|GO:0008028|GO:0015718	integral component of membrane|transmembrane transport|transmembrane transporter activity|membrane|monocarboxylic acid transmembrane transporter activity|monocarboxylic acid transport|integral component of membrane|transmembrane transport|transmembrane transporter activity|membrane|monocarboxylic acid transmembrane transporter activity|monocarboxylic acid transport	Insufficient genetic data for FlyBase to solicit a summary. [Date last reviewed: 2016-06-30]	-	CG10019	-	-	-	-
FBgn0000566	644.374	0.408883	0.14486	2.8226	0.00476357	0.106423	Eip55E	protein_coding	GO:0005737|GO:0006750|GO:0003824|GO:0030170|GO:0019346|GO:0019343|GO:0080146|GO:0044540|GO:0000096|GO:0004123|GO:0003962|GO:0016846|GO:0016829|GO:0019344|GO:0005737|GO:0006750|GO:0003824|GO:0030170|GO:0019346|GO:0019343|GO:0080146|GO:0044540|GO:0000096|GO:0004123|GO:0003962|GO:0016846|GO:0016829|GO:0019344	cytoplasm|glutathione biosynthetic process|catalytic activity|pyridoxal phosphate binding|transsulfuration|cysteine biosynthetic process via cystathionine|L-cysteine desulfhydrase activity|L-cystine L-cysteine-lyase (deaminating)|sulfur amino acid metabolic process|cystathionine gamma-lyase activity|cystathionine gamma-synthase activity|carbon-sulfur lyase activity|lyase activity|cysteine biosynt…	Ecdysone-induced protein 55E (Eip55E) encodes a protein involved in glutathione biosynthesis. [Date last reviewed: 2019-09-12]	Ecdysone-induced protein 55E	Eip55E	-	-	-	-
FBgn0266446	4288.55	0.232062	0.0822188	2.82249	0.00476526	0.106423	CG45076	protein_coding	GO:0016021|GO:0003674|GO:0008150|GO:0005575|GO:0015031|GO:0016021|GO:0003674|GO:0008150|GO:0005575|GO:0015031	integral component of membrane|molecular_function|biological_process|cellular_component|protein transport|integral component of membrane|molecular_function|biological_process|cellular_component|protein transport	Insufficient genetic data for FlyBase to solicit a summary. [Date last reviewed: 2016-06-30]	-	CG45076	-	-	-	-
FBgn0032457	564.471	-0.308836	0.109433	-2.82214	0.0047704	0.106423	CG15483	protein_coding	GO:0005794|GO:0015020|GO:0035269|GO:0016740|GO:0016757	Golgi apparatus|glucuronosyltransferase activity|protein O-linked mannosylation|transferase activity|transferase activity, transferring glycosyl groups	-	-	CG15483	-	-	-	-
FBgn0051493	292.487	0.476654	0.169173	2.81755	0.00483919	0.107798	CG31493	protein_coding	GO:0005737|GO:0032504|GO:0008080|GO:0016740|GO:0016746|GO:0004060|GO:0005737|GO:0032504|GO:0008080|GO:0016740|GO:0016746|GO:0004060	cytoplasm|multicellular organism reproduction|N-acetyltransferase activity|transferase activity|transferase activity, transferring acyl groups|arylamine N-acetyltransferase activity|cytoplasm|multicellular organism reproduction|N-acetyltransferase activity|transferase activity|transferase activity, transferring acyl groups|arylamine N-acetyltransferase activity	Insufficient genetic data for FlyBase to solicit a summary. [Date last reviewed: 2016-06-30]	-	CG31493	-	-	-	-
FBgn0039811	13.7089	1.41082	0.501075	2.81559	0.00486883	0.108297	CG15550	protein_coding	GO:0016021|GO:0016020|GO:0003674|GO:0008150|GO:0005575	integral component of membrane|membrane|molecular_function|biological_process|cellular_component	Insufficient genetic data for FlyBase to solicit a summary. [Date last reviewed: 2016-10-13]	-	CG15550	-	-	-	-
FBgn0029890	836.351	-0.269543	0.0957813	-2.81415	0.00489067	0.10857	Fum2	protein_coding	GO:0005737|GO:0016829|GO:0005739|GO:0006099|GO:0003824|GO:0006108|GO:0006106|GO:0004333|GO:0045239	cytoplasm|lyase activity|mitochondrion|tricarboxylic acid cycle|catalytic activity|malate metabolic process|fumarate metabolic process|fumarate hydratase activity|tricarboxylic acid cycle enzyme complex	-	Fumarase 2	Fum2	-	-	-	-
FBgn0033286	16816.2	-0.233023	0.0828135	-2.81383	0.00489556	0.10857	CG2127	protein_coding			Insufficient genetic data for FlyBase to solicit a summary. [Date last reviewed: 2016-06-30]	-	CG2127	-	-	-	-
FBgn0052548	3516.3	-0.256347	0.0912138	-2.81039	0.00494808	0.109573	CG32548	protein_coding			Insufficient genetic data for FlyBase to solicit a summary. [Date last reviewed: 2016-06-30]	-	CG32548	-	-	-	-
FBgn0029951	1122.75	-0.325263	0.11577	-2.80958	0.00496067	0.109594	CG11369	protein_coding			Insufficient genetic data for FlyBase to solicit a summary. [Date last reviewed: 2016-06-30]	-	CG11369	-	-	-	-
FBgn0029877	732.32	-0.287982	0.102507	-2.80939	0.00496362	0.109594	CG17717	protein_coding	GO:0016021|GO:0008270|GO:0016020|GO:0008150|GO:0005575|GO:0004842|GO:0016567|GO:0061630|GO:0016021|GO:0008270|GO:0016020|GO:0008150|GO:0005575|GO:0004842|GO:0016567	integral component of membrane|zinc ion binding|membrane|biological_process|cellular_component|ubiquitin-protein transferase activity|protein ubiquitination|ubiquitin protein ligase activity|integral component of membrane|zinc ion binding|membrane|biological_process|cellular_component|ubiquitin-protein transferase activity|protein ubiquitination	-	-	CG17717	-	-	-	-
FBgn0265943	3.3585	4.13659	1.47326	2.80779	0.00498835	0.109978	lncRNA:CR44730	ncRNA			-	long non-coding RNA:CR44730	lncRNA:CR44730	-	-	-	-
FBgn0028374	88.3747	0.61034	0.217577	2.80517	0.00502907	0.110713	Hug	protein_coding	GO:0005576|GO:0005615|GO:0005179|GO:0007218|GO:0030536|GO:0018990|GO:0071855|GO:0016084|GO:0005102|GO:0008255	extracellular region|extracellular space|hormone activity|neuropeptide signaling pathway|larval feeding behavior|ecdysis, chitin-based cuticle|neuropeptide receptor binding|myostimulatory hormone activity|signaling receptor binding|ecdysis-triggering hormone activity	-	Hugin	Hug	Probably has a role in larval molting.	Belongs to the pyrokinin family.	-	-
FBgn0010246	2684.47	-0.428331	0.15272	-2.80469	0.00503653	0.110715	Myo61F	protein_coding	GO:0005524|GO:0003774|GO:0016459|GO:0005515|GO:0005524|GO:0003774|GO:0016459|GO:0005515|GO:0005524|GO:0005886|GO:0005938|GO:0007498|GO:0003779|GO:0042742|GO:0005516|GO:0048803|GO:0005546|GO:0003774|GO:0042623|GO:0005903|GO:0007368|GO:0016459|GO:0032528|GO:0016020|GO:0000166|GO:0005737|GO:0008289|GO:0007015|GO:0051015|GO:0031982|GO:0015629|GO:0000146|GO:0030898|GO:0030050|GO:0005902|GO:0005515|GO:…	ATP binding|motor activity|myosin complex|protein binding|ATP binding|motor activity|myosin complex|protein binding|ATP binding|plasma membrane|cell cortex|mesoderm development|actin binding|defense response to bacterium|calmodulin binding|imaginal disc-derived male genitalia morphogenesis|phosphatidylinositol-4,5-bisphosphate binding|motor activity|ATPase activity, coupled|brush border|determina…	-	Myosin 61F	Myo61F	Unconventional myosin that functions as actin-based motor protein with ATPase activity (PubMed:30467170). Binds to membranes enriched in phosphatidylinositol 4-5-bisphosphate, and can glide along actin filaments when anchored to a lipid bilayer (PubMed:30467170). Functions as antagonist for Myo31DF, an unconventional myosin with an essential role in the establishment of body left-right asymmetry …	Belongs to the TRAFAC class myosin-kinesin ATPase superfamily. Myosin family.	Binds F-actin.	-
FBgn0037985	4126.75	-0.251178	0.0895889	-2.80367	0.00505241	0.110902	ssp5	protein_coding			Insufficient genetic data for FlyBase to solicit a summary. [Date last reviewed: 2016-06-30]	short spindle 5	ssp5	-	-	-	-
FBgn0036587	184.202	0.524772	0.187226	2.80288	0.00506484	0.111012	CG4950	protein_coding	GO:0016021|GO:0016020|GO:0005515|GO:0016021|GO:0016020|GO:0005515	integral component of membrane|membrane|protein binding|integral component of membrane|membrane|protein binding	Insufficient genetic data for FlyBase to solicit a summary. [Date last reviewed: 2016-06-30]	-	CG4950	-	-	-	-
FBgn0053346	51.8951	-0.920081	0.328542	-2.80049	0.00510244	0.111674	CG33346	protein_coding	GO:0046872|GO:0003676|GO:0005739|GO:0005743|GO:0016787|GO:0006309|GO:0004521|GO:0004519|GO:0000014|GO:0004529|GO:0000737|GO:0005634|GO:0090502|GO:0004518	metal ion binding|nucleic acid binding|mitochondrion|mitochondrial inner membrane|hydrolase activity|apoptotic DNA fragmentation|endoribonuclease activity|endonuclease activity|single-stranded DNA endodeoxyribonuclease activity|exodeoxyribonuclease activity|DNA catabolic process, endonucleolytic|nucleus|RNA phosphodiester bond hydrolysis, endonucleolytic|nuclease activity	Insufficient genetic data for FlyBase to solicit a summary. [Date last reviewed: 2016-06-30]	-	CG33346	-	-	-	-
FBgn0039591	39.4704	-0.845706	0.302268	-2.79787	0.00514407	0.112421	CG9988	protein_coding	GO:0032504|GO:0003824	multicellular organism reproduction|catalytic activity	Insufficient genetic data for FlyBase to solicit a summary. [Date last reviewed: 2016-06-30]	-	CG9988	-	-	-	-
FBgn0000157	135.742	0.490367	0.175369	2.7962	0.0051708	0.112723	Dll	protein_coding	GO:0003677|GO:0005634|GO:0003700|GO:0016319|GO:0045893|GO:0006357|GO:0006355|GO:0010629|GO:0043565|GO:0042048|GO:0007479|GO:0007480|GO:0000978|GO:0008587|GO:0007487|GO:0035215|GO:0007469|GO:0048728|GO:0007485|GO:0010092|GO:0007449|GO:0021553|GO:0035114|GO:0048264|GO:0007275|GO:0000981|GO:0003677|GO:0005634|GO:0006355|GO:0043565|GO:0007275|GO:0006357|GO:0000981|GO:0003677|GO:0006355|GO:0043565	DNA binding|nucleus|DNA-binding transcription factor activity|mushroom body development|positive regulation of transcription, DNA-templated|regulation of transcription by RNA polymerase II|regulation of transcription, DNA-templated|negative regulation of gene expression|sequence-specific DNA binding|olfactory behavior|leg disc proximal/distal pattern formation|imaginal disc-derived leg morphogene…	Distal-less (Dll) encodes a homedomain transcription factor whose expression is induced in limb primordia and specifies limb (distal) versus body wall (proximal). [Date last reviewed: 2019-03-07]	Distal-less	Dll	Transcription factor that plays a role in larval and adult appendage development. Specifies the identity of ventral appendages (including legs and antennae) and suppresses dorsal appendage development. Involved in patterning the distal-proximal limb axis. May control the adhesive properties of cells during limb morphogenesis. Also has a secondary role in the normal patterning of the wing margin.	-	-	-
FBgn0003257	259.156	-0.363211	0.129901	-2.79606	0.00517291	0.112723	r-l	protein_coding	GO:0006207|GO:0003824|GO:0009116|GO:0006221|GO:0019856|GO:0044205|GO:0004588|GO:0004590|GO:0006222|GO:0016740|GO:0016757|GO:0008152|GO:0016829|GO:0016831	'de novo' pyrimidine nucleobase biosynthetic process|catalytic activity|nucleoside metabolic process|pyrimidine nucleotide biosynthetic process|pyrimidine nucleobase biosynthetic process|'de novo' UMP biosynthetic process|orotate phosphoribosyltransferase activity|orotidine-5'-phosphate decarboxylase activity|UMP biosynthetic process|transferase activity|transferase activity, transferring glycosy…	rudimentary-like (r-l) encodes an enzyme involved in the novo pyrimidine biosynthesis. [Date last reviewed: 2019-07-11]	rudimentary-like	r-l	-	-	-	Pyrimidine metabolism; UMP biosynthesis via de novo pathway; UMP from orotate: step 1/2. Pyrimidine metabolism; UMP biosynthesis via de novo pathway; UMP from orotate: step 2/2.
FBgn0036143	65.6076	0.662938	0.23714	2.79555	0.00518107	0.112737	CG14142	protein_coding	GO:0016807|GO:1990380|GO:0004180|GO:0016787|GO:0004843|GO:0071108|GO:0016807|GO:1990380|GO:0004180|GO:0016787|GO:0004843|GO:0071108|GO:0016807|GO:1990380|GO:0004180|GO:0016787|GO:0004843|GO:0071108	cysteine-type carboxypeptidase activity|Lys48-specific deubiquitinase activity|carboxypeptidase activity|hydrolase activity|thiol-dependent ubiquitin-specific protease activity|protein K48-linked deubiquitination|cysteine-type carboxypeptidase activity|Lys48-specific deubiquitinase activity|carboxypeptidase activity|hydrolase activity|thiol-dependent ubiquitin-specific protease activity|protein K…	Insufficient genetic data for FlyBase to solicit a summary. [Date last reviewed: 2016-06-30]	-	CG14142	-	-	-	-
FBgn0032235	962.29	-0.333235	0.119242	-2.79462	0.00519608	0.1129	CG5096	protein_coding	GO:0016021|GO:0016020|GO:0005515	integral component of membrane|membrane|protein binding	Insufficient genetic data for FlyBase to solicit a summary. [Date last reviewed: 2016-06-30]	-	CG5096	-	-	-	-
FBgn0267692	66.9882	0.922648	0.330216	2.79408	0.00520483	0.112927	lncRNA:CR46028	ncRNA			-	long non-coding RNA:CR46028	lncRNA:CR46028	-	-	-	-
FBgn0263709	11.5606	1.51383	0.542059	2.79275	0.00522626	0.113228	lncRNA:CR43661	ncRNA			-	long non-coding RNA:CR43661	lncRNA:CR43661	-	-	-	-
FBgn0266451	3427.81	0.207295	0.0742458	2.79201	0.00523816	0.11331	fau	protein_coding	GO:0034059|GO:0003674|GO:0005575	response to anoxia|molecular_function|cellular_component	Insufficient genetic data for FlyBase to solicit a summary. [Date last reviewed: 2016-06-30]	fau	fau	Plays an important role in the regulation of tissue responsiveness to oxygen deprivation.	-	-	-
FBgn0051928	4.4338	2.98584	1.06959	2.79158	0.00524514	0.11331	CG31928	protein_coding	GO:0006508|GO:0042600|GO:0030163|GO:0004190|GO:0016740|GO:0016787|GO:0016779|GO:0005764|GO:0008219|GO:0006508|GO:0042600|GO:0030163|GO:0004190|GO:0016740|GO:0016787|GO:0016779|GO:0005764|GO:0008219	proteolysis|egg chorion|protein catabolic process|aspartic-type endopeptidase activity|transferase activity|hydrolase activity|nucleotidyltransferase activity|lysosome|cell death|proteolysis|egg chorion|protein catabolic process|aspartic-type endopeptidase activity|transferase activity|hydrolase activity|nucleotidyltransferase activity|lysosome|cell death	Insufficient genetic data for FlyBase to solicit a summary. [Date last reviewed: 2016-06-30]	-	CG31928	-	-	-	-
FBgn0004395	390.22	0.341237	0.122267	2.79093	0.00525574	0.113376	unk	protein_coding	GO:0003677|GO:0046872|GO:0005737|GO:0008270|GO:0007476|GO:0050767|GO:0048749|GO:0030182|GO:0008407|GO:0002164|GO:0007275|GO:0005515|GO:0003677|GO:0046872|GO:0005737|GO:0008270|GO:0007476|GO:0050767|GO:0048749|GO:0030182|GO:0008407|GO:0002164|GO:0007275|GO:0005515|GO:0046872|GO:0005737|GO:0046872|GO:0005737|GO:0046872|GO:0005737|GO:0003677|GO:0046872|GO:0005737|GO:0008270|GO:0007476|GO:0050767|GO:…	DNA binding|metal ion binding|cytoplasm|zinc ion binding|imaginal disc-derived wing morphogenesis|regulation of neurogenesis|compound eye development|neuron differentiation|chaeta morphogenesis|larval development|multicellular organism development|protein binding|DNA binding|metal ion binding|cytoplasm|zinc ion binding|imaginal disc-derived wing morphogenesis|regulation of neurogenesis|compound e…	unkempt (unk) encodes a highly conserved protein with roles in mRNA binding and ubiquitination. Together with the product of hdc, it acts downstream of the product of Mtor to regulate photoreceptor differentiation during eye development. [Date last reviewed: 2019-03-21]	unkempt	unk	Essential for late larval/early pupal development.	Belongs to the unkempt family.	-	-
FBgn0030356	2363.23	-0.291281	0.104451	-2.78868	0.00529239	0.113971	lncRNA:CR32661	ncRNA			-	long non-coding RNA:CR32661	lncRNA:CR32661	-	-	-	-
FBgn0039599	221.154	0.458298	0.164364	2.7883	0.00529849	0.113971	intr	protein_coding	GO:0005576|GO:0006508|GO:0004252|GO:0032504|GO:0045434|GO:0008236|GO:0046693	extracellular region|proteolysis|serine-type endopeptidase activity|multicellular organism reproduction|negative regulation of female receptivity, post-mating|serine-type peptidase activity|sperm storage	Insufficient genetic data for FlyBase to solicit a summary. [Date last reviewed: 2016-06-30]	intrepid	intr	-	-	-	-
FBgn0028983	423.322	-0.34528	0.12389	-2.787	0.00531987	0.114127	Spn55B	protein_coding	GO:0005615|GO:0008233|GO:0004867|GO:0045861|GO:0010951|GO:0006508|GO:0005576|GO:0030414|GO:0010466	extracellular space|peptidase activity|serine-type endopeptidase inhibitor activity|negative regulation of proteolysis|negative regulation of endopeptidase activity|proteolysis|extracellular region|peptidase inhibitor activity|negative regulation of peptidase activity	Insufficient genetic data for FlyBase to solicit a summary. [Date last reviewed: 2016-06-30]	Serpin 55B	Spn55B	-	-	-	-
FBgn0031143	836.14	0.301484	0.108218	2.7859	0.00533796	0.114127	CG1532	protein_coding			-	-	CG1532	-	-	-	-
FBgn0037498	431.742	0.351972	0.126349	2.78571	0.00534111	0.114127	CG10029	protein_coding	GO:0005783|GO:0006457|GO:0045454|GO:0015037|GO:0003756|GO:0016853|GO:0055114	endoplasmic reticulum|protein folding|cell redox homeostasis|peptide disulfide oxidoreductase activity|protein disulfide isomerase activity|isomerase activity|oxidation-reduction process	-	-	CG10029	-	-	-	-
FBgn0033164	446.35	0.336969	0.120979	2.78535	0.00534707	0.114127	CG11112	protein_coding	GO:0005615|GO:0032504|GO:0003674	extracellular space|multicellular organism reproduction|molecular_function	-	-	CG11112	-	-	-	-
FBgn0261843	79.8171	0.578667	0.20779	2.78486	0.00535503	0.114127	pre-mod(mdg4)-W	protein_coding	GO:0003674|GO:0008150|GO:0005575|GO:0003674|GO:0008150|GO:0005575	molecular_function|biological_process|cellular_component|molecular_function|biological_process|cellular_component	Insufficient genetic data for FlyBase to solicit a summary. [Date last reviewed: 2016-10-13]	-	pre-mod(mdg4)-W	-	-	-	-
FBgn0034356	449.011	-0.583043	0.209367	-2.78479	0.00535631	0.114127	Pepck2	protein_coding	GO:0005829|GO:0005739|GO:0071333|GO:0005525|GO:0006094|GO:0030145|GO:0042594|GO:0006090|GO:0017076|GO:0019543|GO:0004613|GO:0033993|GO:0046327|GO:0000166|GO:0016301|GO:0016310|GO:0046872|GO:0016829|GO:0004611|GO:0016831|GO:0005829|GO:0005739|GO:0071333|GO:0005525|GO:0006094|GO:0030145|GO:0042594|GO:0006090|GO:0017076|GO:0019543|GO:0004613|GO:0033993|GO:0046327|GO:0000166|GO:0016301|GO:0016310|GO:…	cytosol|mitochondrion|cellular response to glucose stimulus|GTP binding|gluconeogenesis|manganese ion binding|response to starvation|pyruvate metabolic process|purine nucleotide binding|propionate catabolic process|phosphoenolpyruvate carboxykinase (GTP) activity|response to lipid|glycerol biosynthetic process from pyruvate|nucleotide binding|kinase activity|phosphorylation|metal ion binding|lyas…	-	Phosphoenolpyruvate carboxykinase 2	Pepck2	-	-	-	-
FBgn0029752	4444.7	-0.248982	0.0894131	-2.78462	0.00535898	0.114127	TrxT	protein_coding	GO:0005623|GO:0004791|GO:0045454|GO:0006662|GO:0015035|GO:0047134|GO:0016491|GO:0055114|GO:0005623|GO:0004791|GO:0045454|GO:0006662|GO:0015035|GO:0047134|GO:0016491|GO:0055114|GO:0005634|GO:0005694|GO:0015036|GO:0006457|GO:0000806	cell|thioredoxin-disulfide reductase activity|cell redox homeostasis|glycerol ether metabolic process|protein disulfide oxidoreductase activity|protein-disulfide reductase activity|oxidoreductase activity|oxidation-reduction process|cell|thioredoxin-disulfide reductase activity|cell redox homeostasis|glycerol ether metabolic process|protein disulfide oxidoreductase activity|protein-disulfide redu…	-	Thioredoxin T	TrxT	Probably participates in various redox reactions through the reversible oxidation of its active center dithiol to a disulfide and catalyzes dithiol-disulfide exchange reactions. Its tissue specificity suggests a regulatory role in the germline.	Belongs to the thioredoxin family.	-	-
FBgn0038423	1537.54	-0.297715	0.107216	-2.77678	0.00549003	0.116589	CG10317	protein_coding	GO:0003674|GO:0008150|GO:0005575|GO:0003674|GO:0008150|GO:0005575	molecular_function|biological_process|cellular_component|molecular_function|biological_process|cellular_component	Insufficient genetic data for FlyBase to solicit a summary. [Date last reviewed: 2016-06-30]	-	CG10317	-	-	-	-
FBgn0032110	856.373	-0.272357	0.098084	-2.77678	0.0054901	0.116589	CG3748	protein_coding			Insufficient genetic data for FlyBase to solicit a summary. [Date last reviewed: 2016-06-30]	-	CG3748	-	-	-	-
FBgn0053223	245.513	-0.402888	0.145129	-2.77607	0.00550208	0.116678	CG33223	protein_coding	GO:0003674|GO:0005575|GO:0005515|GO:0003674|GO:0005575|GO:0005515	molecular_function|cellular_component|protein binding|molecular_function|cellular_component|protein binding	-	-	CG33223	-	-	-	-
FBgn0037222	202.48	0.5756	0.207545	2.77338	0.00554772	0.117276	CG14642	protein_coding	GO:0006508|GO:0004252|GO:0016787|GO:0008233|GO:0008236|GO:0006508|GO:0004252|GO:0016787|GO:0006508|GO:0004252|GO:0016787|GO:0008233|GO:0008236	proteolysis|serine-type endopeptidase activity|hydrolase activity|peptidase activity|serine-type peptidase activity|proteolysis|serine-type endopeptidase activity|hydrolase activity|proteolysis|serine-type endopeptidase activity|hydrolase activity|peptidase activity|serine-type peptidase activity	Insufficient genetic data for FlyBase to solicit a summary. [Date last reviewed: 2016-06-30]	-	CG14642	-	-	-	-
FBgn0051010	1139.33	-0.251554	0.0907171	-2.77296	0.00555495	0.117276	CG31010	protein_coding			Insufficient genetic data for FlyBase to solicit a summary. [Date last reviewed: 2016-06-30]	-	CG31010	-	-	-	-
FBgn0267938	24.0101	1.01999	0.367848	2.77286	0.00555658	0.117276	lncRNA:CR46218	ncRNA			-	long non-coding RNA:CR46218	lncRNA:CR46218	-	-	-	-
FBgn0029147	257.341	0.584495	0.210813	2.77257	0.00556152	0.117276	NtR	protein_coding	GO:0016021|GO:0007165|GO:0005887|GO:0007268|GO:0045202|GO:0004888|GO:0042391|GO:0034220|GO:0043005|GO:0050877|GO:0005216|GO:0005230|GO:0006811|GO:0016020|GO:0030594|GO:0016021|GO:0007165|GO:0005887|GO:0007268|GO:0045202|GO:0004888|GO:0042391|GO:0034220|GO:0043005|GO:0050877|GO:0005216|GO:0005230|GO:0006811|GO:0016020|GO:0030594	integral component of membrane|signal transduction|integral component of plasma membrane|chemical synaptic transmission|synapse|transmembrane signaling receptor activity|regulation of membrane potential|ion transmembrane transport|neuron projection|nervous system process|ion channel activity|extracellular ligand-gated ion channel activity|ion transport|membrane|neurotransmitter receptor activity|…	Insufficient genetic data for FlyBase to solicit a summary. [Date last reviewed: 2016-06-30]	NtR	NtR	-	-	-	-
FBgn0042101	48.6313	-0.805142	0.290605	-2.77057	0.00559584	0.117834	CG18744	protein_coding	GO:0005737|GO:0015031	cytoplasm|protein transport	Insufficient genetic data for FlyBase to solicit a summary. [Date last reviewed: 2016-06-30]	-	CG18744	-	-	-	-
FBgn0266789	35.1908	0.816236	0.294669	2.77001	0.00560547	0.117872	lncRNA:CR45254	ncRNA			-	long non-coding RNA:CR45254	lncRNA:CR45254	-	-	-	-
FBgn0283625	3683.52	-0.259746	0.093877	-2.76687	0.00565967	0.118842	CG46298	protein_coding			Insufficient genetic data for FlyBase to solicit a summary. [Date last reviewed: 2016-10-13]	-	CG46298	-	-	-	-
FBgn0010241	466.279	0.507134	0.183336	2.76615	0.00567233	0.118842	Mdr50	protein_coding	GO:0016021|GO:0005524|GO:0016887|GO:0005886|GO:0055085|GO:0042626|GO:0017085|GO:0015562|GO:0042908|GO:0043190|GO:0009636|GO:0097254|GO:0008559|GO:0016020|GO:0000166|GO:0016787	integral component of membrane|ATP binding|ATPase activity|plasma membrane|transmembrane transport|ATPase-coupled transmembrane transporter activity|response to insecticide|efflux transmembrane transporter activity|xenobiotic transport|ATP-binding cassette (ABC) transporter complex|response to toxic substance|renal tubular secretion|ATPase-coupled xenobiotic transmembrane transporter activity|mem…	-	Multi drug resistance 50	Mdr50	-	-	-	-
FBgn0051867	319.349	-0.365109	0.132	-2.76597	0.00567536	0.118842	CG31867	protein_coding	GO:0016021|GO:0016020|GO:0003674|GO:0008150|GO:0005575|GO:0016021|GO:0016020|GO:0003674|GO:0008150|GO:0005575	integral component of membrane|membrane|molecular_function|biological_process|cellular_component|integral component of membrane|membrane|molecular_function|biological_process|cellular_component	Insufficient genetic data for FlyBase to solicit a summary. [Date last reviewed: 2016-06-30]	-	CG31867	-	-	-	-
FBgn0029896	10216.8	0.290902	0.1052	2.76522	0.00568842	0.118929	CG3168	protein_coding	GO:0016021|GO:0055085|GO:0022857|GO:0016020|GO:0016021|GO:0055085|GO:0022857|GO:0016020|GO:0016021|GO:0055085|GO:0022857|GO:0016020|GO:0016021|GO:0055085|GO:0022857|GO:0016020|GO:0016021|GO:0055085|GO:0022857|GO:0016020|GO:0016021|GO:0055085|GO:0022857|GO:0016020|GO:0016021|GO:0055085|GO:0022857|GO:0016020	integral component of membrane|transmembrane transport|transmembrane transporter activity|membrane|integral component of membrane|transmembrane transport|transmembrane transporter activity|membrane|integral component of membrane|transmembrane transport|transmembrane transporter activity|membrane|integral component of membrane|transmembrane transport|transmembrane transporter activity|membrane|int…	Insufficient genetic data for FlyBase to solicit a summary. [Date last reviewed: 2016-06-30]	-	CG3168	-	-	-	-
FBgn0261625	1828.02	0.272803	0.0986692	2.76483	0.00569533	0.118929	GLS	protein_coding	GO:0005739|GO:0004359|GO:0006541|GO:0006537|GO:0006543|GO:0016787|GO:0005515|GO:0005739|GO:0004359|GO:0006541|GO:0006537|GO:0006543|GO:0016787|GO:0005515|GO:0005739|GO:0004359|GO:0006541|GO:0006537|GO:0006543|GO:0016787|GO:0005515|GO:0005739|GO:0004359|GO:0006541|GO:0006537|GO:0006543|GO:0016787|GO:0005515|GO:0005739|GO:0004359|GO:0006541|GO:0006537|GO:0006543|GO:0016787|GO:0005515|GO:0005739|GO:…	mitochondrion|glutaminase activity|glutamine metabolic process|glutamate biosynthetic process|glutamine catabolic process|hydrolase activity|protein binding|mitochondrion|glutaminase activity|glutamine metabolic process|glutamate biosynthetic process|glutamine catabolic process|hydrolase activity|protein binding|mitochondrion|glutaminase activity|glutamine metabolic process|glutamate biosynthetic…	Insufficient genetic data for FlyBase to solicit a summary. [Date last reviewed: 2016-06-30]	Glutaminase	GLS	-	-	-	-
FBgn0266208	33.2285	-0.960301	0.347425	-2.76405	0.00570889	0.119046	lncRNA:CR44903	ncRNA			-	long non-coding RNA:CR44903	lncRNA:CR44903	-	-	-	-
FBgn0053531	86.4975	0.585569	0.211939	2.76291	0.00572889	0.119298	Ddr	protein_coding	GO:0043235|GO:0006468|GO:0005887|GO:0004713|GO:0007169|GO:0004714|GO:0030154|GO:0007160|GO:0001952|GO:0008284|GO:0005518|GO:1903053|GO:0038062|GO:0007275|GO:0016740|GO:0018108|GO:0033674|GO:0038063|GO:0005524|GO:0043235|GO:0006468|GO:0005887|GO:0004713|GO:0007169|GO:0004714|GO:0030154|GO:0004672|GO:0007160|GO:0001952|GO:0008284|GO:0005518|GO:1903053|GO:0038062|GO:0016020|GO:0016021|GO:0007275|GO:…	receptor complex|protein phosphorylation|integral component of plasma membrane|protein tyrosine kinase activity|transmembrane receptor protein tyrosine kinase signaling pathway|transmembrane receptor protein tyrosine kinase activity|cell differentiation|cell-matrix adhesion|regulation of cell-matrix adhesion|positive regulation of cell population proliferation|collagen binding|regulation of extra…	-	Discoidin domain receptor	Ddr	-	-	-	-
FBgn0029747	702.136	-0.283126	0.102544	-2.76101	0.00576226	0.119336	CG5062	protein_coding	GO:0005654|GO:0003674|GO:0008150	nucleoplasm|molecular_function|biological_process	-	-	CG5062	-	-	-	-
FBgn0038373	7277.63	-0.232254	0.0841226	-2.7609	0.00576421	0.119336	CG4546	protein_coding	GO:0005524|GO:0005615|GO:0032504|GO:0003824|GO:0016301|GO:0016772|GO:0000166|GO:0016740|GO:0016310|GO:0004111|GO:0046314|GO:0004054	ATP binding|extracellular space|multicellular organism reproduction|catalytic activity|kinase activity|transferase activity, transferring phosphorus-containing groups|nucleotide binding|transferase activity|phosphorylation|creatine kinase activity|phosphocreatine biosynthetic process|arginine kinase activity	Insufficient genetic data for FlyBase to solicit a summary. [Date last reviewed: 2016-06-30]	-	CG4546	-	-	-	-
FBgn0033915	1131.09	-0.341496	0.123691	-2.76087	0.00576482	0.119336	CG8485	protein_coding	GO:0005634|GO:0005737|GO:0005524|GO:0035556|GO:0006468|GO:0004672|GO:0004674|GO:0000166|GO:0016740|GO:0005634|GO:0005737|GO:0005524|GO:0035556|GO:0006468|GO:0004672|GO:0004674|GO:0000166|GO:0016740|GO:0005634|GO:0005737|GO:0005524|GO:0035556|GO:0006468|GO:0004672|GO:0004674|GO:0000166|GO:0016740	nucleus|cytoplasm|ATP binding|intracellular signal transduction|protein phosphorylation|protein kinase activity|protein serine/threonine kinase activity|nucleotide binding|transferase activity|nucleus|cytoplasm|ATP binding|intracellular signal transduction|protein phosphorylation|protein kinase activity|protein serine/threonine kinase activity|nucleotide binding|transferase activity|nucleus|cytop…	Insufficient genetic data for FlyBase to solicit a summary. [Date last reviewed: 2016-06-30]	-	CG8485	-	-	-	-
FBgn0033205	284.355	-0.481204	0.174307	-2.76067	0.00576837	0.119336	CG2064	protein_coding	GO:0012505|GO:0052650|GO:0016020|GO:0016021|GO:0016491|GO:0055114|GO:0042572	endomembrane system|NADP-retinol dehydrogenase activity|membrane|integral component of membrane|oxidoreductase activity|oxidation-reduction process|retinol metabolic process	Insufficient genetic data for FlyBase to solicit a summary. [Date last reviewed: 2016-06-30]	-	CG2064	-	-	-	-
FBgn0031389	136.499	0.556244	0.201498	2.76055	0.0057705	0.119336	CG4259	protein_coding	GO:0006508|GO:0004252|GO:0016787|GO:0006508|GO:0004252|GO:0016787	proteolysis|serine-type endopeptidase activity|hydrolase activity|proteolysis|serine-type endopeptidase activity|hydrolase activity	Insufficient genetic data for FlyBase to solicit a summary. [Date last reviewed: 2016-06-30]	-	CG4259	-	-	-	-
FBgn0083950	247.037	0.485526	0.175976	2.75905	0.00579701	0.11972	side-VI	protein_coding	GO:0016021|GO:0016020|GO:0005515|GO:0016021|GO:0016020|GO:0005515	integral component of membrane|membrane|protein binding|integral component of membrane|membrane|protein binding	Insufficient genetic data for FlyBase to solicit a summary. [Date last reviewed: 2017-07-13]	sidestep VI	side-VI	-	-	-	-
FBgn0262825	517.233	0.429877	0.155969	2.75618	0.00584814	0.120375	lncRNA:CR43196	ncRNA			-	long non-coding RNA:CR43196	lncRNA:CR43196	-	-	-	-
FBgn0063485	2116.34	-0.362753	0.131627	-2.75592	0.00585278	0.120375	Lasp	protein_coding	GO:0046872|GO:0005515|GO:0046872|GO:0005515|GO:0046872|GO:0005829|GO:0007283|GO:0030018|GO:0045214|GO:0003779|GO:0051015|GO:0005925|GO:0007291|GO:0007279|GO:0071689|GO:0070864|GO:0031672|GO:0045856|GO:0014881|GO:0005515|GO:0046872|GO:0005515	metal ion binding|protein binding|metal ion binding|protein binding|metal ion binding|cytosol|spermatogenesis|Z disc|sarcomere organization|actin binding|actin filament binding|focal adhesion|sperm individualization|pole cell formation|muscle thin filament assembly|sperm individualization complex|A band|positive regulation of pole plasm oskar mRNA localization|regulation of myofibril size|protein…	Lasp (Lasp) encodes a member of the nebulin family. It plays subtle roles in modulating the actin cytoskeleton in ovaries, testes, and muscles, by serving as a scaffold protein binding multiple partners, especially actin and myosin. In indirect flight muscles, it contributes to I-band and A-band architecture. [Date last reviewed: 2019-03-14]	Lasp	Lasp	-	-	Interacts with osk.	-
FBgn0264605	2116.34	-0.362753	0.131627	-2.75592	0.00585278	0.120375	CG43954	protein_coding	GO:0016021|GO:0016020|GO:0003674|GO:0008150	integral component of membrane|membrane|molecular_function|biological_process	-	-	CG43954	-	-	-	-
FBgn0034713	916.512	-0.272518	0.0989502	-2.7541	0.00588546	0.120881	CG11291	protein_coding	GO:0005737|GO:0005829|GO:0006470|GO:0004721|GO:0016311|GO:0016791|GO:0016787	cytoplasm|cytosol|protein dephosphorylation|phosphoprotein phosphatase activity|dephosphorylation|phosphatase activity|hydrolase activity	Insufficient genetic data for FlyBase to solicit a summary. [Date last reviewed: 2016-06-30]	-	CG11291	-	-	-	-
FBgn0051515	194.531	0.437582	0.159017	2.7518	0.00592694	0.121567	CG31515	protein_coding	GO:0005615|GO:0032504|GO:0004867|GO:0010951|GO:0030414|GO:0010466	extracellular space|multicellular organism reproduction|serine-type endopeptidase inhibitor activity|negative regulation of endopeptidase activity|peptidase inhibitor activity|negative regulation of peptidase activity	-	-	CG31515	-	-	-	-
FBgn0039855	626.033	-0.301535	0.109787	-2.74654	0.00602278	0.123353	CG1638	protein_coding	GO:0005739|GO:0006637|GO:0047617|GO:0016787	mitochondrion|acyl-CoA metabolic process|acyl-CoA hydrolase activity|hydrolase activity	-	-	CG1638	-	-	-	-
FBgn0053526	2375.4	0.219427	0.0799044	2.74612	0.00603045	0.123353	PNUTS	protein_coding	GO:0005634|GO:0046872|GO:0008157|GO:0010467|GO:0048589|GO:0005634|GO:0008157|GO:0010467|GO:0048589|GO:0005634|GO:0008157|GO:0010467|GO:0048589|GO:0046872|GO:0005634|GO:0046872|GO:0008157|GO:0010467|GO:0048589	nucleus|metal ion binding|protein phosphatase 1 binding|gene expression|developmental growth|nucleus|protein phosphatase 1 binding|gene expression|developmental growth|nucleus|protein phosphatase 1 binding|gene expression|developmental growth|metal ion binding|nucleus|metal ion binding|protein phosphatase 1 binding|gene expression|developmental growth	Phosphatase 1 nuclear targeting subunit (PNUTS) encodes a protein phosphatase 1 binding protein involved in developmental growth and gene expression. [Date last reviewed: 2019-09-26]	Phosphatase 1 nuclear targeting subunit	PNUTS	-	-	-	-
FBgn0040985	1456.95	0.235279	0.0857064	2.74517	0.00604792	0.123462	CG6115	protein_coding			Insufficient genetic data for FlyBase to solicit a summary. [Date last reviewed: 2017-07-13]	-	CG6115	-	-	-	-
FBgn0040069	123.198	0.656552	0.239187	2.74494	0.00605222	0.123462	vanin-like	protein_coding	GO:0016787|GO:0019898|GO:0016811|GO:0006807|GO:0016020|GO:0005886|GO:0008150|GO:0031225	hydrolase activity|extrinsic component of membrane|hydrolase activity, acting on carbon-nitrogen (but not peptide) bonds, in linear amides|nitrogen compound metabolic process|membrane|plasma membrane|biological_process|anchored component of membrane	Insufficient genetic data for FlyBase to solicit a summary. [Date last reviewed: 2016-06-30]	vanin-like	vanin-like	Probable hydrolase.	Belongs to the carbon-nitrogen hydrolase superfamily. BTD/VNN family.	-	-
FBgn0267740	346.977	-0.367902	0.134058	-2.74435	0.00606318	0.123518	asRNA:CR46071	ncRNA			-	antisense RNA:CR46071	asRNA:CR46071	-	-	-	-
FBgn0037994	1078.75	-0.245738	0.0896584	-2.74082	0.0061286	0.124681	eIF3d2	protein_coding	GO:0005737|GO:0003743|GO:0006413|GO:0006446|GO:0016282|GO:0033290|GO:0001732|GO:0005852|GO:0098808|GO:0002191|GO:0003723|GO:0006412|GO:0002183	cytoplasm|translation initiation factor activity|translational initiation|regulation of translational initiation|eukaryotic 43S preinitiation complex|eukaryotic 48S preinitiation complex|formation of cytoplasmic translation initiation complex|eukaryotic translation initiation factor 3 complex|mRNA cap binding|cap-dependent translational initiation|RNA binding|translation|cytoplasmic translational…	Insufficient genetic data for FlyBase to solicit a summary. [Date last reviewed: 2016-06-30]	eukaryotic translation initiation factor 3 subunit d2	eIF3d2	mRNA cap-binding component of the eukaryotic translation initiation factor 3 (eIF-3) complex, which is involved in protein synthesis of a specialized repertoire of mRNAs and, together with other initiation factors, stimulates binding of mRNA and methionyl-tRNAi to the 40S ribosome. The eIF-3 complex specifically targets and initiates translation of a subset of mRNAs involved in cell proliferation…	Belongs to the eIF-3 subunit D family.	Component of the eukaryotic translation initiation factor 3 (eIF-3) complex. The eIF-3 complex interacts with pix.	-
FBgn0061197	13125.9	-0.226187	0.0825832	-2.7389	0.00616458	0.124981	salto	protein_coding	GO:0003674|GO:0008150|GO:0005575|GO:0003674|GO:0008150|GO:0005575|GO:0003674|GO:0008150|GO:0005575|GO:0003674|GO:0008150|GO:0005575	molecular_function|biological_process|cellular_component|molecular_function|biological_process|cellular_component|molecular_function|biological_process|cellular_component|molecular_function|biological_process|cellular_component	Insufficient genetic data for FlyBase to solicit a summary. [Date last reviewed: 2016-06-30]	salto	salto	-	-	-	-
FBgn0034398	6301.42	-0.33797	0.123401	-2.7388	0.00616641	0.124981	CG15098	protein_coding	GO:0016021|GO:0016020	integral component of membrane|membrane	Insufficient genetic data for FlyBase to solicit a summary. [Date last reviewed: 2016-06-30]	-	CG15098	-	-	-	-
FBgn0038897	173.979	-0.434898	0.158797	-2.7387	0.00616828	0.124981	CG5849	protein_coding	GO:0005737|GO:0006508|GO:0008270|GO:0070006|GO:0043171|GO:0042277|GO:0008237|GO:0016787|GO:0046872|GO:0004177|GO:0008233|GO:0005737|GO:0006508|GO:0008270|GO:0070006|GO:0043171|GO:0042277|GO:0008237|GO:0016787|GO:0046872|GO:0008233	cytoplasm|proteolysis|zinc ion binding|metalloaminopeptidase activity|peptide catabolic process|peptide binding|metallopeptidase activity|hydrolase activity|metal ion binding|aminopeptidase activity|peptidase activity|cytoplasm|proteolysis|zinc ion binding|metalloaminopeptidase activity|peptide catabolic process|peptide binding|metallopeptidase activity|hydrolase activity|metal ion binding|peptid…	Insufficient genetic data for FlyBase to solicit a summary. [Date last reviewed: 2016-06-30]	-	CG5849	-	-	-	-
FBgn0037454	1764.13	-0.247162	0.0903125	-2.73674	0.00620512	0.125304	CG1137	protein_coding	GO:0005737|GO:0005856|GO:0031514|GO:0042995|GO:0005929|GO:0005515	cytoplasm|cytoskeleton|motile cilium|cell projection|cilium|protein binding	Insufficient genetic data for FlyBase to solicit a summary. [Date last reviewed: 2016-06-30]	-	CG1137	-	-	-	-
FBgn0250845	5753.36	-0.233342	0.085268	-2.73657	0.00620826	0.125304	CG1288	protein_coding	GO:0016021|GO:0016020|GO:0003674|GO:0008150|GO:0005575|GO:0016021|GO:0016020|GO:0003674|GO:0008150|GO:0005575	integral component of membrane|membrane|molecular_function|biological_process|cellular_component|integral component of membrane|membrane|molecular_function|biological_process|cellular_component	Insufficient genetic data for FlyBase to solicit a summary. [Date last reviewed: 2016-10-13]	-	CG1288	-	-	-	-
FBgn0266445	572.854	0.27661	0.101081	2.73652	0.0062093	0.125304	CG45075	protein_coding	GO:0003674|GO:0008150|GO:0005575	molecular_function|biological_process|cellular_component	Insufficient genetic data for FlyBase to solicit a summary. [Date last reviewed: 2016-10-13]	-	CG45075	-	-	-	-
FBgn0037000	324.827	0.330038	0.120682	2.73476	0.00624253	0.125806	ZnT77C	protein_coding	GO:0016021|GO:0005886|GO:0055085|GO:0016323|GO:0005385|GO:0010312|GO:0071577|GO:0006812|GO:0022883|GO:0008324|GO:0016020|GO:0006882|GO:0006829|GO:0016021|GO:0005886|GO:0055085|GO:0016323|GO:0005385|GO:0010312|GO:0071577|GO:0006812|GO:0022883|GO:0008324|GO:0016020|GO:0006882|GO:0006829	integral component of membrane|plasma membrane|transmembrane transport|basolateral plasma membrane|zinc ion transmembrane transporter activity|detoxification of zinc ion|zinc ion transmembrane transport|cation transport|zinc efflux transmembrane transporter activity|cation transmembrane transporter activity|membrane|cellular zinc ion homeostasis|zinc ion transport|integral component of membrane|p…	Zinc transporter 77C (ZnT77C) encodes a protein involved in zinc detoxification and zinc transmembrane import. [Date last reviewed: 2019-09-12]	Zinc transporter 77C	ZnT77C	-	-	-	-
FBgn0261058	250.466	0.427885	0.156528	2.73361	0.00626446	0.125907	Sfp38D	protein_coding	GO:0005615|GO:0032504|GO:0003674|GO:0005615|GO:0032504|GO:0003674	extracellular space|multicellular organism reproduction|molecular_function|extracellular space|multicellular organism reproduction|molecular_function	-	Seminal fluid protein 38D	Sfp38D	-	-	-	-
FBgn0267639	46.8988	0.714403	0.261367	2.73334	0.00626963	0.125907	lncRNA:CR45977	ncRNA			-	long non-coding RNA:CR45977	lncRNA:CR45977	-	-	-	-
FBgn0038208	5950.01	-0.265257	0.0970509	-2.73318	0.00627269	0.125907	CG14355	protein_coding			Insufficient genetic data for FlyBase to solicit a summary. [Date last reviewed: 2016-06-30]	-	CG14355	-	-	-	-
FBgn0263338	71.6438	0.588396	0.215375	2.73195	0.006296	0.126206	lncRNA:CR43419	ncRNA			-	long non-coding RNA:CR43419	lncRNA:CR43419	-	-	-	-
FBgn0052119	2495.01	-0.232666	0.0852876	-2.72802	0.00637156	0.12755	CG32119	protein_coding	GO:0003674|GO:0008150|GO:0005575	molecular_function|biological_process|cellular_component	Insufficient genetic data for FlyBase to solicit a summary. [Date last reviewed: 2016-10-13]	-	CG32119	-	-	-	-
FBgn0032285	13288.2	-0.409543	0.150225	-2.7262	0.00640691	0.127953	CG17108	protein_coding			Insufficient genetic data for FlyBase to solicit a summary. [Date last reviewed: 2016-06-30]	-	CG17108	-	-	-	-
FBgn0085420	196.986	-0.479307	0.175821	-2.7261	0.00640873	0.127953	DIP-delta	protein_coding	GO:0005887|GO:0050808|GO:0043005|GO:0005887|GO:0050808|GO:0043005|GO:0005515|GO:0005887|GO:0050808|GO:0043005|GO:0005515	integral component of plasma membrane|synapse organization|neuron projection|integral component of plasma membrane|synapse organization|neuron projection|protein binding|integral component of plasma membrane|synapse organization|neuron projection|protein binding	Insufficient genetic data for FlyBase to solicit a summary. [Date last reviewed: 2017-07-13]	Dpr-interacting protein delta	DIP-delta	-	-	-	-
FBgn0037410	25.8152	-1.11373	0.408628	-2.72555	0.00641953	0.127978	Osi2	protein_coding	GO:0005887|GO:0016020|GO:0016021|GO:0003674|GO:0008150|GO:0005887|GO:0016020|GO:0016021|GO:0003674|GO:0008150|GO:0005887|GO:0016020|GO:0016021|GO:0003674|GO:0008150	integral component of plasma membrane|membrane|integral component of membrane|molecular_function|biological_process|integral component of plasma membrane|membrane|integral component of membrane|molecular_function|biological_process|integral component of plasma membrane|membrane|integral component of membrane|molecular_function|biological_process	-	Osiris 2	Osi2	-	-	-	-
FBgn0037615	307.772	0.348911	0.128049	2.72483	0.00643342	0.127978	CG11760	protein_coding	GO:0016021|GO:0060271|GO:0005929|GO:1905515|GO:0035869|GO:0016020|GO:0003674	integral component of membrane|cilium assembly|cilium|non-motile cilium assembly|ciliary transition zone|membrane|molecular_function	Insufficient genetic data for FlyBase to solicit a summary. [Date last reviewed: 2016-06-30]	-	CG11760	-	-	-	-
FBgn0032449	255.955	-0.398813	0.146368	-2.72472	0.00643553	0.127978	CG17036	protein_coding	GO:0016021|GO:0005886|GO:0055085|GO:0090482|GO:0016020|GO:0035461|GO:0051180|GO:0016021|GO:0005886|GO:0055085|GO:0090482|GO:0016020|GO:0035461|GO:0051180	integral component of membrane|plasma membrane|transmembrane transport|vitamin transmembrane transporter activity|membrane|vitamin transmembrane transport|vitamin transport|integral component of membrane|plasma membrane|transmembrane transport|vitamin transmembrane transporter activity|membrane|vitamin transmembrane transport|vitamin transport	-	-	CG17036	-	-	-	-
FBgn0051712	1095.88	0.286648	0.105304	2.72211	0.00648663	0.12871	CG31712	protein_coding	GO:0005739|GO:0005654|GO:0003674|GO:0008150|GO:0005575	mitochondrion|nucleoplasm|molecular_function|biological_process|cellular_component	Insufficient genetic data for FlyBase to solicit a summary. [Date last reviewed: 2016-06-30]	-	CG31712	-	Belongs to the UPF0430 family.	-	-
FBgn0039425	1949.02	-0.266618	0.0979507	-2.72197	0.00648949	0.12871	Ald2	protein_coding	GO:0005829|GO:0003824|GO:0006096|GO:0030388|GO:0004332|GO:0016829|GO:0005829|GO:0003824|GO:0006096|GO:0030388|GO:0004332|GO:0016829	cytosol|catalytic activity|glycolytic process|fructose 1,6-bisphosphate metabolic process|fructose-bisphosphate aldolase activity|lyase activity|cytosol|catalytic activity|glycolytic process|fructose 1,6-bisphosphate metabolic process|fructose-bisphosphate aldolase activity|lyase activity	Insufficient genetic data for FlyBase to solicit a summary. [Date last reviewed: 2016-06-30]	Aldolase 2	Ald2	-	-	-	-
FBgn0038280	972.797	-0.301797	0.110931	-2.72058	0.00651677	0.129028	CG14861	protein_coding	GO:0005509|GO:0046872	calcium ion binding|metal ion binding	Insufficient genetic data for FlyBase to solicit a summary. [Date last reviewed: 2016-06-30]	-	CG14861	-	-	-	-
FBgn0035143	1607.75	-0.250298	0.0920121	-2.72028	0.00652275	0.129028	Ppm1	protein_coding	GO:0005634|GO:0046872|GO:0005737|GO:0000079|GO:0006470|GO:0003824|GO:0004721|GO:0004722|GO:0004724|GO:0071470|GO:1990439|GO:0032873|GO:0043169|GO:0005575|GO:0016787	nucleus|metal ion binding|cytoplasm|regulation of cyclin-dependent protein serine/threonine kinase activity|protein dephosphorylation|catalytic activity|phosphoprotein phosphatase activity|protein serine/threonine phosphatase activity|magnesium-dependent protein serine/threonine phosphatase activity|cellular response to osmotic stress|MAP kinase serine/threonine phosphatase activity|negative regu…	-	Ppm1	Ppm1	-	-	-	-
[truncated: 17,051 more rows]
