# Supplementary material for: Exploiting a Y chromosome-linked Cas9 for sex selection and gene drive
Source: Nat Commun. 2021 Dec 10;12:7202. doi: 10.1038/s41467-021-27333-1 (PMC8664916; doi:10.1038/s41467-021-27333-1)
Supplement: Supplementary file 9 — Source Data File [file 41467_2021_27333_MOESM9_ESM.xlsx]

## Sheet: Fig. 2
2. multiplexed tRNA-gRNA crosses (RAW counts)
SGyA(♂) x tRNA-gRNA (♀)
	Replicate 1					Replicate 2						Replicate 3						Replicate 4						Replicate 5						Replicate 6						Replicate 7
	Counts of F1 progeny		Percentages of F1 progeny				Counts of F1 progeny		Percentages of F1 progeny				Counts of F1 progeny		Percentages of F1 progeny				Counts of F1 progeny		Percentages of F1 progeny				Counts of F1 progeny		Percentages of F1 progeny				Counts of F1 progeny		Percentages of F1 progeny				Counts of F1 progeny		Percentages of F1 progeny
Phenotype (+red eyes)	♀	♂	%♀	%♂		Phenotype (+red eyes)	♀	♂	%♀	%♂		Phenotype (+red eyes)	♀	♂	%♀	%♂		Phenotype (+red eyes)	♀	♂	%♀	%♂		Phenotype (+red eyes)	♀	♂	%♀	%♂		Phenotype (+red eyes)	♀	♂	%♀	%♂		Phenotype (+red eyes)	♀	♂	%♀	%♂
Ebony	0	1	0	1.5625		Ebony	0	0	0	0		Ebony	0	1	0	0.729927		Ebony	0	0	0	0		Ebony	0	0	0	0		Ebony	0	0	0	0		Ebony	0	0	0	0
Forked	0	38	0	59.375		Forked	0	52	0	78.7879		Forked	0	99	0	72.2628		Forked	0	80	0	83.3333		Forked	0	107	0	86.9919		Forked	0	79	0	80.6122		Forked	0	23	0	76.6667
Sepia	0	0	0	0		Sepia	0	0	0	0		Sepia	0	0	0	0		Sepia	0	0	0	0		Sepia	0	0	0	0		Sepia	0	0	0	0		Sepia	0	0	0	0
Curled	0	0	0	0		Curled	0	0	0	0		Curled	0	0	0	0		Curled	0	0	0	0		Curled	0	0	0	0		Curled	0	0	0	0		Curled	0	0	0	0
Ebony-forked	0	19	0	29.6875		Ebony-forked	0	14	0	21.2121		Ebony-forked	0	31	0	22.6277		Ebony-forked	0	14	0	14.5833		Ebony-forked	0	15	0	12.1951		Ebony-forked	0	17	0	17.3469		Ebony-forked	0	7	0	23.3333
Ebony-Sepia	0	3	0	4.6875		Ebony-Sepia	0	0	0	0		Ebony-Sepia	0	0	0	0		Ebony-Sepia	0	0	0	0		Ebony-Sepia	0	0	0	0		Ebony-Sepia	0	0	0	0		Ebony-Sepia	0	0	0	0
Ebony-Cured	0	0	0	0		Ebony-Cured	0	0	0	0		Ebony-Cured	0	0	0	0		Ebony-Cured	0	0	0	0		Ebony-Cured	0	0	0	0		Ebony-Cured	0	0	0	0		Ebony-Cured	0	0	0	0
Forked-Sepia	0	0	0	0		Forked-Sepia	0	0	0	0		Forked-Sepia	0	0	0	0		Forked-Sepia	0	0	0	0		Forked-Sepia	0	0	0	0		Forked-Sepia	0	0	0	0		Forked-Sepia	0	0	0	0
Forked-Curled	0	0	0	0		Forked-Curled	0	0	0	0		Forked-Curled	0	0	0	0		Forked-Curled	0	0	0	0		Forked-Curled	0	0	0	0		Forked-Curled	0	0	0	0		Forked-Curled	0	0	0	0
Curled-Sepia	0	0	0	0		Curled-Sepia	0	0	0	0		Curled-Sepia	0	0	0	0		Curled-Sepia	0	0	0	0		Curled-Sepia	0	0	0	0		Curled-Sepia	0	0	0	0		Curled-Sepia	0	0	0	0
Ebony-forked-Sepia	0	3	0	4.6875		Ebony-forked-Sepia	0	0	0	0		Ebony-forked-Sepia	0	0	0	0		Ebony-forked-Sepia	0	0	0	0		Ebony-forked-Sepia	0	0	0	0		Ebony-forked-Sepia	0	0	0	0		Ebony-forked-Sepia	0	0	0	0
Ebony-forked-Curled	0	0	0	0		Ebony-forked-Curled	0	0	0	0		Ebony-forked-Curled	0	0	0	0		Ebony-forked-Curled	0	0	0	0		Ebony-forked-Curled	0	0	0	0		Ebony-forked-Curled	0	0	0	0		Ebony-forked-Curled	0	0	0	0
Ebony-Curled-Sepia	0	0	0	0		Ebony-Curled-Sepia	0	0	0	0		Ebony-Curled-Sepia	0	0	0	0		Ebony-Curled-Sepia	0	0	0	0		Ebony-Curled-Sepia	0	0	0	0		Ebony-Curled-Sepia	0	0	0	0		Ebony-Curled-Sepia	0	0	0	0
Forked-Sepia-Curled	0	0	0	0		Forked-Sepia-Curled	0	0	0	0		Forked-Sepia-Curled	0	0	0	0		Forked-Sepia-Curled	0	0	0	0		Forked-Sepia-Curled	0	0	0	0		Forked-Sepia-Curled	0	0	0	0		Forked-Sepia-Curled	0	0	0	0
WT	64	0	100	0		WT	80	0	100	0		WT	118	6	100	4.37956		WT	108	2	100	2.08333		WT	106	1	100	0.813008		WT	101	2	100	2.04082		WT	27	0	100	0
Subtotal	64	64	100	100		Subtotal	80	66	100	100		Subtotal	118	137	100	100		Subtotal	108	96	100	100		Subtotal	106	123	100	100		Subtotal	101	98	100	100		Subtotal	27	30	100	100
Total	128					Total	146					Total	255					Total	204					Total	229					Total	199					Total	57
			%♀	%♂					%♀	%♂					%♀	%♂					%♀	%♂					%♀	%♂					%♀	%♂					%♀	%♂
		Proportion of mutants	0	100				Proportion of mutants	0	100				Proportion of mutants	0	95.6204				Proportion of mutants	0	97.9167				Proportion of mutants	0	99.187				Proportion of mutants	0	97.9592				Proportion of mutants	0	100
Autosomal Cas9 (♂) x tRNA-gRNA (♀)
	Replicate 1					Replicate 2						Replicate 3						Replicate 4						Replicate 5						Replicate 6						Replicate 7
	Counts of F1 progeny		Percentages of F1 progeny				Counts of F1 progeny		Percentages of F1 progeny				Counts of F1 progeny		Percentages of F1 progeny				Counts of F1 progeny		Percentages of F1 progeny				Counts of F1 progeny		Percentages of F1 progeny				Counts of F1 progeny		Percentages of F1 progeny				Counts of F1 progeny		Percentages of F1 progeny
Phenotype (+red eyes)	♀	♂	%♀	%♂		Phenotype (+red eyes)	♀	♂	%♀	%♂		Phenotype (+red eyes)	♀	♂	%♀	%♂		Phenotype (+red eyes)	♀	♂	%♀	%♂		Phenotype (+red eyes)	♀	♂	%♀	%♂		Phenotype (+red eyes)	♀	♂	%♀	%♂		Phenotype (+red eyes)	♀	♂	%♀	%♂
Ebony	0	0	0	0		Ebony			0	0		Ebony	0	0	0	0		Ebony	0	0	0	0		Ebony	0	0	0	0		Ebony	0	0	0	0		Ebony	0	0	0	0
Forked	0	0	0	0		Forked			0	0		Forked	0	0	0	0		Forked	0	0	0	0		Forked	0	0	0	0		Forked	0	0	0	0		Forked	0	0	0	0
Sepia	0	0	0	0		Sepia			0	0		Sepia	0	0	0	0		Sepia	0	0	0	0		Sepia	0	0	0	0		Sepia	0	0	0	0		Sepia	0	0	0	0
Curled	0	0	0	0		Curled			0	0		Curled	0	0	0	0		Curled	0	0	0	0		Curled	0	0	0	0		Curled	0	0	0	0		Curled	0	0	0	0
Ebony-forked	0	0	0	0		Ebony-forked			0	0		Ebony-forked	0	0	0	0		Ebony-forked	0	0	0	0		Ebony-forked	0	0	0	0		Ebony-forked	0	0	0	0		Ebony-forked	0	0	0	0
Ebony-Sepia	0	0	0	0		Ebony-Sepia			0	0		Ebony-Sepia	7	1	5.38462	0.813008		Ebony-Sepia	9	0	8.18182	0		Ebony-Sepia	8	0	6.83761	0		Ebony-Sepia	6	0	18.75	0		Ebony-Sepia	6	0	22.2222	0
Ebony-Cured	0	0	0	0		Ebony-Cured			0	0		Ebony-Cured	0	0	0	0		Ebony-Cured	0	0	0	0		Ebony-Cured	0	0	0	0		Ebony-Cured	0	0	0	0		Ebony-Cured	0	0	0	0
Forked-Sepia	0	0	0	0		Forked-Sepia			0	0		Forked-Sepia	0	0	0	0		Forked-Sepia	0	0	0	0		Forked-Sepia	0	0	0	0		Forked-Sepia	0	0	0	0		Forked-Sepia	0	0	0	0
Forked-Curled	0	0	0	0		Forked-Curled			0	0		Forked-Curled	0	0	0	0		Forked-Curled	0	0	0	0		Forked-Curled	0	0	0	0		Forked-Curled	0	0	0	0		Forked-Curled	0	0	0	0
Curled-Sepia	0	0	0	0		Curled-Sepia			0	0		Curled-Sepia	0	0	0	0		Curled-Sepia	0	0	0	0		Curled-Sepia	0	0	0	0		Curled-Sepia	0	0	0	0		Curled-Sepia	0	0	0	0
Ebony-forked-Sepia	15	12	100	100		Ebony-forked-Sepia	44	34	100	100		Ebony-forked-Sepia	123	122	94.6154	99.187		Ebony-forked-Sepia	101	112	91.8182	100		Ebony-forked-Sepia	109	91	93.1624	100		Ebony-forked-Sepia	26	49	81.25	100		Ebony-forked-Sepia	21	11	77.7778	100
Ebony-forked-Curled	0	0	0	0		Ebony-forked-Curled			0	0		Ebony-forked-Curled	0	0	0	0		Ebony-forked-Curled	0	0	0	0		Ebony-forked-Curled	0	0	0	0		Ebony-forked-Curled	0	0	0	0		Ebony-forked-Curled	0	0	0	0
Ebony-Curled-Sepia	0	0	0	0		Ebony-Curled-Sepia			0	0		Ebony-Curled-Sepia	0	0	0	0		Ebony-Curled-Sepia	0	0	0	0		Ebony-Curled-Sepia	0	0	0	0		Ebony-Curled-Sepia	0	0	0	0		Ebony-Curled-Sepia	0	0	0	0
Forked-Sepia-Curled	0	0	0	0		Forked-Sepia-Curled			0	0		Forked-Sepia-Curled	0	0	0	0		Forked-Sepia-Curled	0	0	0	0		Forked-Sepia-Curled	0	0	0	0		Forked-Sepia-Curled	0	0	0	0		Forked-Sepia-Curled	0	0	0	0
WT	0	0	0	0		WT			0	0		WT	0	0	0	0		WT	0	0	0	0		WT	0	0	0	0		WT	0	0	0	0		WT	0	0	0	0
Subtotal	15	12	100	100		Subtotal	44	34	100	100		Subtotal	130	123	100	100		Subtotal	110	112	100	100		Subtotal	117	91	100	100		Subtotal	32	49	100	100		Subtotal	27	11	100	100
Total	27					Total	78					Total	253					Total	222					Total	208					Total	81					Total	38
			%♀	%♂					%♀	%♂					%♀	%♂					%♀	%♂					%♀	%♂					%♀	%♂					%♀	%♂
		Proportion of mutants	100	100				Proportion of mutants	100	100				Proportion of mutants	100	100				Proportion of mutants	100	100				Proportion of mutants	100	100				Proportion of mutants	100	100				Proportion of mutants	100	100
WT (♂) x tRNA-gRNA (♀)
	Replicate 1					Replicate 2						Replicate 3						Replicate 4						Replicate 5
	Counts of F1 progeny		Percentages of F1 progeny				Counts of F1 progeny		Percentages of F1 progeny				Counts of F1 progeny		Percentages of F1 progeny				Counts of F1 progeny		Percentages of F1 progeny				Counts of F1 progeny		Percentages of F1 progeny
Phenotype (+red eyes)	♀	♂	%♀	%♂		Phenotype (+red eyes)	♀	♂	%♀	%♂		Phenotype (+red eyes)	♀	♂	%♀	%♂		Phenotype (+red eyes)	♀	♂	%♀	%♂		Phenotype (+red eyes)	♀	♂	%♀	%♂
Ebony	0	0	0	0		Ebony	0	0	0	0		Ebony	0	0	0	0		Ebony	0	0	0	0		Ebony	0	0	0	0
Forked	0	0	0	0		Forked	0	0	0	0		Forked	0	0	0	0		Forked	0	0	0	0		Forked	0	0	0	0
Sepia	0	0	0	0		Sepia	0	0	0	0		Sepia	0	0	0	0		Sepia	0	0	0	0		Sepia	0	0	0	0
Curled	0	0	0	0		Curled	0	0	0	0		Curled	0	0	0	0		Curled	0	0	0	0		Curled	0	0	0	0
Ebony-forked	0	0	0	0		Ebony-forked	0	0	0	0		Ebony-forked	0	0	0	0		Ebony-forked	0	0	0	0		Ebony-forked	0	0	0	0
Ebony-Sepia	0	0	0	0		Ebony-Sepia	0	0	0	0		Ebony-Sepia	0	0	0	0		Ebony-Sepia	0	0	0	0		Ebony-Sepia	0	0	0	0
Ebony-Cured	0	0	0	0		Ebony-Cured	0	0	0	0		Ebony-Cured	0	0	0	0		Ebony-Cured	0	0	0	0		Ebony-Cured	0	0	0	0
Forked-Sepia	0	0	0	0		Forked-Sepia	0	0	0	0		Forked-Sepia	0	0	0	0		Forked-Sepia	0	0	0	0		Forked-Sepia	0	0	0	0
Forked-Curled	0	0	0	0		Forked-Curled	0	0	0	0		Forked-Curled	0	0	0	0		Forked-Curled	0	0	0	0		Forked-Curled	0	0	0	0
Curled-Sepia	0	0	0	0		Curled-Sepia	0	0	0	0		Curled-Sepia	0	0	0	0		Curled-Sepia	0	0	0	0		Curled-Sepia	0	0	0	0
Ebony-forked-Sepia	0	0	0	0		Ebony-forked-Sepia	0	0	0	0		Ebony-forked-Sepia	0	0	0	0		Ebony-forked-Sepia	0	0	0	0		Ebony-forked-Sepia	0	0	0	0
Ebony-forked-Curled	0	0	0	0		Ebony-forked-Curled	0	0	0	0		Ebony-forked-Curled	0	0	0	0		Ebony-forked-Curled	0	0	0	0		Ebony-forked-Curled	0	0	0	0
Ebony-Curled-Sepia	0	0	0	0		Ebony-Curled-Sepia	0	0	0	0		Ebony-Curled-Sepia	0	0	0	0		Ebony-Curled-Sepia	0	0	0	0		Ebony-Curled-Sepia	0	0	0	0
Forked-Sepia-Curled	0	0	0	0		Forked-Sepia-Curled	0	0	0	0		Forked-Sepia-Curled	0	0	0	0		Forked-Sepia-Curled	0	0	0	0		Forked-Sepia-Curled	0	0	0	0
WT	95	102	100	100		WT	30	31	100	100		WT	41	48	100	100		WT	44	43	100	100		WT	31	40	100	100
Subtotal	95	102	100	100		Subtotal	30	31	100	100		Subtotal	41	48	100	100		Subtotal	44	43	100	100		Subtotal	31	40	100	100
Total	197					Total	61					Total	89					Total	87					Total	71
			%♀	%♂					%♀	%♂					%♀	%♂					%♀	%♂					%♀	%♂
		Proportion of mutants	0	0				Proportion of mutants	0	0				Proportion of mutants	0	0				Proportion of mutants	0	0				Proportion of mutants	0	0

## Sheet: Fig. 3
3. Heterozygous PolG2#1 crosses RAW data
3A. Heterozygous PolG2#1 crossed to WT
(WT) x PolG2#1/+							(WT) x PolG2#1/+
	Counts of F1 progeny							% of F1 progeny
Cross	♀ W- C-	♀ W+/C+	♂W-C-	♂W+C+	Total		Cross	♀ W- C-	♀ W+/C+	♂W-C-	♂W+C+	Total
	-gRNA	gRNA+	-gRNA	gRNA+				-gRNA	gRNA+	-gRNA	gRNA+
1	10	6	17	8	41		1	24.3902	14.6341	41.4634	19.5122	100
2	5	5	4	1	15		2	33.3333	33.3333	26.6667	6.66667	100
3	8	7	5	4	24		3	33.3333	29.1667	20.8333	16.6667	100
4	5	4	1	2	12		4	41.6667	33.3333	8.33333	16.6667	100
5	6	11	10	8	35		5	17.1429	31.4286	28.5714	22.8571	100
6	15	21	16	18	70		6	21.4286	30	22.8571	25.7143	100
7	15	15	17	15	62		7	24.1935	24.1935	27.4194	24.1935	100
8	8	14	12	16	50		8	16	28	24	32	100
9	15	10	11	18	54		9	27.7778	18.5185	20.3704	33.3333	100
10	15	10	10	9	44		10	34.0909	22.7273	22.7273	20.4545	100
3C. Heterozygous PolG2#1 crossed to autosomal Cas9
Autosomal vasa-Cas9 x PolG2#1/+							Autosomal vasa-Cas9 x PolG2#1/+
	Counts of F1 progeny							% of F1 progeny
Cross	♀ W- C-	♀ W+/C+	♂W-C-	♂W+C+	Total		Cross	♀ W- C-	♀ W+/C+	♂W-C-	♂W+C+	Total
	-gRNA	gRNA+	-gRNA	gRNA+				-gRNA	gRNA+	-gRNA	gRNA+
1	16	0	11	0	27		1	59.2593	0	40.7407	0	100
2	25	0	20	0	45		2	55.5556	0	44.4444	0	100
3	17	0	22	0	39		3	43.5897	0	56.4103	0	100
4	44	0	37	0	81		4	54.321	0	45.679	0	100
5	21	0	15	0	36		5	58.3333	0	41.6667	0	100
6	21	0	24	0	45		6	46.6667	0	53.3333	0	100
7	15	0	8	0	23		7	65.2174	0	34.7826	0	100
8	27	0	18	0	45		8	60	0	40	0	100
9	27	0	17	0	44		9	61.3636	0	38.6364	0	100
10	19	0	21	0	40		10	47.5	0	52.5	0	100
3E. Heterozygous PolG2#1 crossed to X-linked Cas9
X linked-Act5-Cas9 x PolG2#1/+							X linked-Act5-Cas9 x PolG2#1/+
	Counts of F1 progeny							% of F1 progeny
Cross	♀ W+/C-	♀ W+/C+	♂W-C-	♂W+C+	Total		Cross	♀ W- C-	♀ W+/C+	♂W-C-	♂W+C+	Total
	-gRNA	gRNA+	-gRNA	gRNA+				-gRNA	gRNA+	-gRNA	gRNA+
1	18	0	19	20	57		1	31.5789	0	33.3333	35.0877	100
2	23	0	30	27	80		2	28.75	0	37.5	33.75	100
3	23	0	32	20	75		3	30.6667	0	42.6667	26.6667	100
4	25	0	22	32	79		4	31.6456	0	27.8481	40.5063	100
5	24	0	23	21	68		5	35.2941	0	33.8235	30.8824	100
6	20	0	30	20	70		6	28.5714	0	42.8571	28.5714	100
7	34	0	21	16	71		7	47.8873	0	29.5775	22.5352	100
8	27	0	28	25	80		8	33.75	0	35	31.25	100
9	22	0	35	21	78		9	28.2051	0	44.8718	26.9231	100
10	31	0	33	19	83		10	37.3494	0	39.759	22.8916	100
3G. Heterozygous PolG2#1 crossed to SGyA
SGyA x PolG2#1/+							SGyA x PolG2#1/+
	Counts of F1 progeny							% of F1 progeny
	♀ W- C-	♀ W+/C+	♂W-C-	♂W+C+	Total		Cross	♀ W- C-	♀ W+/C+	♂W-C-	♂W+C+	Total
	-gRNA	gRNA+	-gRNA	gRNA+				-gRNA	gRNA+	-gRNA	gRNA+
Y1	18	19	24	0	61		1	29.5082	31.1475	39.3443	0	100
Y2	11	14	18	0	43		2	25.5814	32.5581	41.8605	0	100
Y3	16	20	24	0	60		3	26.6667	33.3333	40	0	100
Y4	11	9	10	0	30		4	36.6667	30	33.3333	0	100
Y5	15	12	9	0	36		5	41.6667	33.3333	25	0	100
Y6	21	18	22	0	61		6	34.4262	29.5082	36.0656	0	100
Y7	6	6	6	0	18		7	33.3333	33.3333	33.3333	0	100
Y8	17	14	13	0	44		8	38.6364	31.8182	29.5455	0	100
Y9	14	18	22	0	54		9	25.9259	33.3333	40.7407	0	100
Y10	25	18	22	0	65		10	38.4615	27.6923	33.8462	0	100
3. Homozygous PolG2#1 crosses RAW
3B. Homozygous PolG2#1 crossed to WT
(WT) x PolG2#1/PolG2#1							(WT) x PolG2#1/PolG2#1
	Counts of F1 progeny							% of F1 progeny
Cross	♀ W- C-	♀ W+/C+	♂W-C-	♂W+C+	Total		Cross	♀ W- C-	♀ W+/C+	♂W-C-	♂W+C+	Total
	-gRNA	gRNA+	-gRNA	gRNA+				-gRNA	gRNA+	-gRNA	gRNA+
1	0	39	0	45	84		1	0	46.4286	0	53.5714	100
2	0	33	0	27	60		2	0	55	0	45	100
3	0	31	0	39	70		3	0	44.2857	0	55.7143	100
4	0	18	0	21	39		4	0	46.1538	0	53.8462	100
5	0	21	0	16	37		5	0	56.7568	0	43.2432	100
6	0	26	0	25	51		6	0	50.9804	0	49.0196	100
7	0	15	0	19	34		7	0	44.1176	0	55.8824	100
8	0	20	0	17	37		8	0	54.0541	0	45.9459	100
9	0	21	0	18	39		9	0	53.8462	0	46.1538	100
10	0	25	0	20	45		10	0	55.5556	0	44.4444	100
3D. Homozygous PolG2#1 crossed to autosomal Cas9
Autosomal vasa-Cas9 x PolG2#1/PolG2#1							Autosomal vasa-Cas9 x PolG2#1/PolG2#1
	Counts of F1 progeny							% of F1 progeny
Cross	♀ W- C-	♀ W+/C+	♂W-C-	♂W+C+	Total		Cross	♀ W- C-	♀ W+/C+	♂W-C-	♂W+C+	Total
	-gRNA	gRNA+	-gRNA	gRNA+				-gRNA	gRNA+	-gRNA	gRNA+
1	0	0	0	0	0		1	0	0	0	0	0
2	0	0	0	0	0		2	0	0	0	0	0
3	0	0	0	0	0		3	0	0	0	0	0
4	0	0	0	0	0		4	0	0	0	0	0
5	0	0	0	0	0		5	0	0	0	0	0
6	0	0	0	0	0		6	0	0	0	0	0
7	0	0	0	0	0		7	0	0	0	0	0
8	0	0	0	0	0		8	0	0	0	0	0
9	0	0	0	0	0		9	0	0	0	0	0
10	0	0	0	0	0		10	0	0	0	0	0
3F. Homozygous PolG2#1 crossed to X-linked Cas9
X linked-Act5-Cas9 x PolG2#1/PolG2#1							X linked-Act5-Cas9 x PolG2#1/PolG2#1
	Counts of F1 progeny							% of F1 progeny
Cross	♀ W+/C-	♀ W+/C+	♂W-C-	♂W+C+	Total		Cross	♀ W- C-	♀ W+/C+	♂W-C-	♂W+C+	Total
	-gRNA	gRNA+	-gRNA	gRNA+				-gRNA	gRNA+	-gRNA	gRNA+
1	0	0	0	79	79		1	0	0	0	100	100
2	0	0	0	29	29		2	0	0	0	100	100
3	0	0	0	51	51		3	0	0	0	100	100
4	0	0	0	20	20		4	0	0	0	100	100
5	0	0	0	27	27		5	0	0	0	100	100
6	0	0	0	31	31		6	0	0	0	100	100
7	0	0	0	39	39		7	0	0	0	100	100
8	0	0	0	47	47		8	0	0	0	100	100
9	0	0	0	51	51		9	0	0	0	100	100
10	0	0	0	43	43		10	0	0	0	100	100
3H. Heterozygous PolG2#1 crossed to SGyA
SGyA x PolG2#1/PolG2#1							SGyA x PolG2#1/PolG2#1
	Counts of F1 progeny							% of F1 progeny
	♀ W- C-	♀ W+/C-	♂W-C-	♂W+C+	Total		Cross	♀ W- C-	♀ W+/C-	♂W-C-	♂W+C+	Total
	-gRNA	gRNA+	-gRNA	gRNA+				-gRNA	gRNA+	-gRNA	gRNA+
1	0	47	0	1	48		1	0	97.9167	0	2.08333	100
2	0	73	0	1	74		2	0	98.6486	0	1.35135	100
3	0	50	0	0	50		3	0	100	0	0	100
4	0	27	0	0	27		4	0	100	0	0	100
5	0	36	0	1	37		5	0	97.2973	0	2.7027	100
6	0	24	0	1	25		6	0	96	0	4	100
7	0	24	0	0	24		7	0	100	0	0	100
8	0	4	0	0	4		8	0	100	0	0	100
9	0	16	0	0	16		9	0	100	0	0	100
10	0	25	0	1	26		10	0	96.1538	0	3.84615	100

## Sheet: Fig. 4
4D. Embryo counts and hatching
(SGyA/GDe)(♂) x w-(♀)					(autosomal Cas9/GDe)(♂) x w-(♀)					(WT/GDe)(♂) x w-(♀)
Cross #	Embryo counts	Adult counts	Hatching rate (%)		Cross #	Embryo counts	Adult counts	Hatching rate (%)		Cross #	Embryo counts	Adult counts	Hatching rate (%)
1	140	140	100		1	138	63	45.6522		1	51	46	90.1961
2	124	112	90.3226		2	223	207	92.8251		2	50	32	64
3	147	127	86.3946		3	150	124	82.6667		3	37	29	78.3784
4	153	153	100		4	153	122	79.7386		4	28	26	92.8571
5	173	173	100		5	134	97	72.3881		5	17	12	70.5882
6	173	164	94.7977		6	233	153	65.6652		6	110	68	61.8182
7	159	145	91.195		7	157	96	61.1465		7	61	51	83.6066
8	154	103	66.8831		8	74	51	68.9189		8	39	38	97.4359
9	149	146	97.9866		9	134	100	74.6269		9	20	18	90
10	150	115	76.6667		10	131	102	77.8626		10	13	12	92.3077
11	107	80	74.7664		Total	1527	1115	721.491		11	73	63	86.3014
12	203	148	72.9064		Average	152.7	111.5	72.1491		12	36	23	63.8889
13	199	151	75.8794		Std. dev	45.9421	44.4653	12.9537		13	24	22	91.6667
14	72	48	66.6667							14	23	17	73.913
15	174	123	70.6897							15	10	8	80
16	111	96	86.4865							16	26	25	96.1538
17	133	123	92.4812							17	13	11	84.6154
18	99	91	91.9192							18	32	29	90.625
19	102	84	82.3529							19	24	22	91.6667
20	80	80	100							20	37	35	94.5946
21	114	111	97.3684							21	22	19	86.3636
22	158	158	100							22	42	40	95.2381
23	25	14	56		Omitted data from analyses. Adult counts below 15 were omitted					23	29	23	79.3103
24	107	107	100							24	36	25	69.4444
25	115	105	91.3043							25	14	13	92.8571
26	130	115	88.4615							26	50	48	96
27	142	99	69.7183							27	44	40	90.9091
28	76	74	97.3684							Total	961	795	2284.74
29	120	92	76.6667							Average	35.5926	29.4444	84.6199
30	132	132	100							Std. dev	21.4032	15.6262	10.8856
31	123	120	97.561
32	124	124	100
33	180	180	100
34	154	154	100
Total	4502	3987	2992.84
Average	132.412	117.265	88.0248
Std. dev	37.4612	35.6773	12.6939
4E. Inheritance of GDe in F2 progeny
F2 progeny		(SGyA/GDe) x w-							F2 progeny		(Autosomal Cas9/GDe) x w-							F2 progeny		(WT/GDe) x w-
Cross	Sex	dsRED+/-	dsRED+/GFP+	-/GFP+	-/-	Totals	%GFP		Cross	Sex	dsRED+/-	dsRED+/GFP+	-/GFP+	-/-	Totals	%GFP		Cross	Sex	dsRED+/-	dsRED+/GFP+	-/GFP+	-/-	Totals	%GFP
1	♀	0	0	48	23	140	62.1429		1	♀	13	13	8	12	94	50		1	♀	0	0	70	65	274	55.1095
	♂	30	39	0	0					♂	11	14	12	11					♂	0	0	81	58
2	♀	0	0	28	23	112	58.9286		2	♀	13	7	18	6	95	58.9474		2	♀	0	0	38	51	180	44.4444
	♂	23	38	0	0					♂	10	16	15	10					♂	0	0	42	49
3	♀	0	0	41	12	127	81.8898		3	♀	6	9	7	5	62	66.129		3	♀	0	0	44	25	147	55.7823
	♂	11	63	0	0					♂	4	9	16	6					♂	0	0	38	40
4	♀	0	0	47	37	153	50.9804		4	♀	2	20	20	3	88	78.4091		4	♀	0	0	44	35	157	49.6815
	♂	38	31	0	0					♂	8	13	16	6					♂	0	0	34	44
5	♀	0	0	47	29	173	62.4277		5	♀	11	8	7	4	64	56.25		5	♀	0	0	41	38	166	52.4096
	♂	36	61	0	0					♂	4	10	11	9					♂	0	0	46	41
6	♀	0	0	46	40	164	50		6	♀	10	13	14	6	89	65.1685		6	♀	0	0	41	49	195	49.2308
	♂	42	36	0	0					♂	6	18	13	9					♂	0	0	55	50
7	♀	0	0	49	19	146	60.9589		7	♀	9	11	17	12	97	62.8866
	♂	38	40	0	0					♂	10	17	16	5
8	♀	0	0	27	21	103	50.4854		8	♀	15	7	7	14	81	38.2716
	♂	30	25	0	0					♂	11	5	12	10
9	♀	0	0	33	38	146	50		9	♀	16	17	21	23	170	50
	♂	35	40	0	0					♂	17	21	26	29
10	♀	0	0	25	24	115	53.913		10	♀	22	39	35	31	262	59.9237
	♂	29	37	0	0					♂	29	33	50	23
11	♀	0	0	30	15	80	72.5		11	♀	14	23	18	8	134	63.4328
	♂	7	28	0	0					♂	18	27	17	9
12	♀	0	0	41	40	148	54.7297		12	♀	18	20	24	9	150	62.6667
	♂	27	40	0	0					♂	13	25	25	16
13	♀	0	0	50	31	151	64.2384		13	♀	15	22	16	9	113	58.4071
	♂	23	47	0	0					♂	9	17	11	14
14	♀	0	0	16	7	48	62.5		14	♀	17	28	31	18	187	62.5668
	♂	11	14	0	0					♂	22	31	27	13
15	♀	0	0	28	27	123	60.1626		15	♀	3	13	3	3	51	60.7843
	♂	22	46	0	0					♂	6	6	9	8
16	♀	0	0	27	23	96	57.2917		16	♀	10	19	27	8	112	66.9643
	♂	18	28	0	0					♂	11	9	20	8
17	♀	0	0	51	19	123	72.3577		17	♀	5	26	21	8	112	72.3214
	♂	15	38	0	0					♂	9	22	12	9
18	♀	0	0	31	17	91	68.1319		18	♀	10	13	21	9	120	62.5
	♂	12	31	0	0					♂	14	23	18	12
19	♀	0	0	22	16	84	50
	♂	26	20	0	0
20	♀	0	0	26	7	80	75
	♂	13	34	0	0
21	♀	0	0	39	15	111	69.3694
	♂	19	38	0	0
22	♀	0	0	55	27	158	74.0506
	♂	14	62	0	0
23	♀	0	0	29	26	107	57.0093
	♂	20	32	0	0
24	♀	0	0	30	20	105	58.0952
	♂	24	31	0	0
25	♀	0	0	36	18	115	68.6957
	♂	18	43	0	0
26	♀	0	0	26	18	99	62.6263
	♂	19	36	0	0
27	♀	0	0	25	18	92	60.8696
	♂	18	31	0	0
28	♀	0	0	29	23	132	55.303
	♂	36	44	0	0
29	♀	0	0	30	25	120	60
	♂	23	42	0	0
30	♀	0	0	47	17	124	63.7097
	♂	28	32	0	0
31	♀	0	0	73	17	179	79.3296
	♂	20	69	0	0
32	♀	0	0	58	30	154	62.3377
	♂	28	38	0	0
4F. Inheritance of GDe in F2 and F3 progeny*
* F2 progeny data is directly above this table. It was omitted in this section to avoid data replication.
F3 progeny		(SGyA/GDe) x w-
Cross	Sex	dsRED+/-	dsRED+/GFP+	-/GFP+	-/-	Totals	%GFP
1	♀	0	0	63	51	222	59.009
	♂	40	68	0	0
2	♀	0	0	57	37	167	59.8802
	♂	30	43	0	0
3	♀	0	0	93	16	247	85.0202
	♂	21	117	0	0
4	♀	0	0	66	27	207	62.3188
	♂	51	63	0	0
5	♀	0	0	70	43	209	61.244
	♂	38	58	0	0
6	♀	0	0	71	44	237	59.4937
	♂	52	70	0	0
7	♀	0	0	46	28	151	64.2384
	♂	26	51	0	0
8	♀	0	0	52	39	168	57.7381
	♂	32	45	0	0
9	♀	0	0	47	13	124	79.8387
	♂	12	52	0	0
4G. Inheritance of GDe in F2 and F3 progeny*
* F2 progeny data is in panel 3E of this sheet. It was omitted in this section to avoid data replication.
F3 progeny		(Autosomal Cas9/GDe) x w-
Cross	Sex	dsRED+/-	dsRED+/GFP+	-/GFP+	-/-	Totals	%GFP
1	♀	12	12	12	3	63	61.9048
	♂	4	7	8	5
2	♀	12	9	9	7	68	58.8235
	♂	5	11	11	4
3	♀	2	10	10	2	51	76.4706
	♂	5	10	9	3
4	♀	5	9	14	5	72	63.8889
	♂	6	12	11	10
5	♀	4	4	4	0	33	66.6667
	♂	1	7	7	6
6	♀	3	15	16	4	80	76.25
	♂	6	17	13	6
7	♀	3	10	15	2	59	81.3559
	♂	5	13	10	1
8	♀	7	14	12	3	77	71.4286
	♂	5	14	15	7
9	♀	5	12	11	7	59	72.8814
	♂	4	12	8	0
10	♀	6	13	6	8	62	62.9032
	♂	6	11	9	3
11	♀	6	13	13	5	71	69.0141
	♂	5	10	13	6
12	♀	3	16	16	1	71	84.507
	♂	4	14	14	3
13	♀	10	18	11	8	80	60
	♂	10	11	8	4
14	♀	4	12	11	5	56	69.6429
	♂	4	7	9	4
15	♀	7	9	10	6	67	68.6567
	♂	4	10	17	4

## Sheet: Fig. S1
S1C. RAW Data
Control
(WT)♂ x (PolG2#1/+)♀
	F1 progeny:Counts			F1 progeny:Percentages
Cross	Females	Males	Totals	% Males	% Females	Dead pupae
1	39	45	84	0.535714	0.464286	1
2	33	27	60	0.45	0.55	1
3	31	39	70	0.557143	0.442857	3
4	18	21	39	0.538462	0.461538	0
5	21	16	37	0.432432	0.567568	2
6	26	25	51	0.490196	0.509804	0
7	15	19	34	0.558824	0.441176	0
8	20	17	37	0.459459	0.540541	1
9	21	18	39	0.461538	0.538462	0
10	25	20	45	0.444444	0.555556	0
Total	249	247	496			8
SGyA males with weak expression of 3xP3-tdTomato marker
(SGyA)♂ x (PolG2#1/+)♀
	F1 progeny:Counts			F1 progeny:Percentages
Cross	Females	Males	Totals	% Males	% Females	Dead pupae
1	50	0	50	0	1	57
2	79	0	79	0	1	79
3	24	1	25	0.04	0.96	49
4	24	0	24	0	1	28
5	4	0	4	0	1	12
6	16	0	16	0	1	26
Total	197	1	198			251
SGyA males with moderate expression of 3xP3-tdTomato marker
(SGyA)♂ x (PolG2#1/+)♀
	F1 progeny:Counts			F1 progeny:Percentages
Cross	Females	Males	Totals	% Males	% Females	Dead pupae
1	27	0	27	0	1	21
2	65	0	65	0	1	75
3	63	0	63	0	1	89
4	84	0	84	0	1	108
5	51	0	51	0	1	67
6	80	0	80	0	1	84
Total	370	0				444

## Sheet: Fig. S4
S4B. RAW Twisted data
F1 progeny:Counts	[WT](♂) x Twisted gRNA (♀)					F1 progeny	[Autosomal Cas9](♂) x Twisted gRNA (♀)					F1 progeny	[SGyA](♂) x Twisted gRNA (♀)
Cross	Sex	w+ eyes; WT	w+; twisted phenotype	Totals		Cross	Sex	w+ eyes; WT	w+; twisted phenotype	Totals		Cross	Sex	w+ eyes; WT	w+; twisted phenotype	Totals
1	♀	37	0	80		1	♀	0	38	50		1	♀	49	0	52
	♂	43	0				♂	0	12				♂	0	3
2	♀	38	0	71		2	♀	0	19	35		2	♀	47	0	58
	♂	33	0				♂	0	16				♂	0	11
3	♀	43	0	75		3	♀	0	22	26		3	♀	47	0	59
	♂	32	0				♂	0	4				♂	0	12
				226
F1 progeny:Percentages	[WT](♂) x Twisted gRNA (♀)					F1 progeny:Percentages	[Autosomal Cas9](♂) x Twisted gRNA (♀)					F1 progeny:Percentages	[SGyA](♂) x Twisted gRNA (♀)
Cross	Sex	w+ eyes; WT	w+; twisted phenotype	Totals		Cross	Sex	w+ eyes; WT	w+; twisted phenotype	Totals		Cross	Sex	w+ eyes; WT	w+; twisted phenotype	Totals
1	♀	46.25	0	100		1	♀	0	76	100		1	♀	94.2308	0	100
	♂	53.75	0				♂	0	24				♂	0	5.76923
2	♀	53.5211	0	100		2	♀	0	54.2857	100		2	♀	81.0345	0	100
	♂	46.4789	0				♂	0	45.7143				♂	0	18.9655
3	♀	57.3333	0	100		3	♀	0	84.6154	100		3	♀	79.661	0	100
	♂	42.6667	0				♂	0	15.3846				♂	0	20.339
S4C. RAW Cut data
F1 progeny:Counts	[WT](♂) x Cut gRNA (♀)					F1 progeny:Counts	[Autosomal Cas9](♂) x Cut gRNA (♀)					F1 progeny:Counts	[SGyA](♂) x Cut gRNA (♀)
Cross	Sex	w+ eyes; WT	w+; deformed wing phenotype	Totals		Cross	Sex	w+ eyes; WT	w+; deformed wing phenotype	Totals		Cross	Sex	w+ eyes; WT	w+; deformed wing phenotype	Totals
1	♀	32	0	59		1	♀	0	0	0		1	♀	82	0	82
	♂	27	0				♂	0	0				♂	0	0
2	♀	32	0	65		2	♀	0	0	0		2	♀	54	0	54
	♂	33	0				♂	0	0				♂	0	0
3	♀	40	0	88		3	♀	0	0	0		3	♀	61	0	61
	♂	48	0				♂	0	0				♂	0	0
F1 progeny:Percentages	[WT](♂) x Cut gRNA (♀)					F1 progeny:Percentages	[Autosomal Cas9](♂) x Cut gRNA (♀)					F1 progeny:Percentages	[SGyA](♂) x Cut gRNA (♀)
Cross	Sex	w+ eyes; WT	w+; twisted phenotype	Totals		Cross	Sex	w+ eyes; WT	w+; twisted phenotype	Totals		Cross	Sex	w+ eyes; WT	w+; twisted phenotype	Totals
1	♀	54.2373	0	100		1	♀	0	0	0		1	♀	100	0	100
	♂	45.7627	0				♂	0	0				♂	0	0
2	♀	49.2308	0	100		2	♀	0	0	0		2	♀	100	0	100
	♂	50.7692	0				♂	0	0				♂	0	0
3	♀	45.4545	0	100		3	♀	0	0	0		3	♀	100	0	100
	♂	54.5455	0				♂	0	0				♂	0	0
S4D. RAW Wingless data
F1 progeny:Counts	[WT](♂) x Wingless gRNA (♀)					F1 progeny:Counts	[Autosomal Cas9](♂) x Wingless gRNA (♀)					F1 progeny:Counts	[SGyA](♂) x Wingless gRNA (♀)
Cross	Sex	w+ eyes; WT	w+; deformed wing phenotype	Totals		Cross	Sex	w+ eyes; WT	w+; deformed wing phenotype	Totals		Cross	Sex	w+ eyes; WT	w+; deformed wing phenotype	Totals
1	♀	60	0	125		1	♀	0	0	0		1	♀	54	0	54
	♂	65	0				♂	0	0				♂	0	0
2	♀	43	0	87		2	♀	0	0	0		2	♀	64	0	64
	♂	44	0				♂	0	0				♂	0	0
3	♀	51	0	108		3	♀	0	0	0		3	♀	42	0	42
	♂	57	0				♂	0	0				♂	0	0
F1 progeny:Percentages	[WT](♂) x Wingless gRNA (♀)					F1 progeny:Percentages	[Autosomal Cas9](♂) x Wingless gRNA (♀)					F1 progeny:Percentages	[SGyA](♂) x Wingless gRNA (♀)
Cross	Sex	w+ eyes; WT	w+; twisted phenotype	Totals		Cross	Sex	w+ eyes; WT	w+; twisted phenotype	Totals		Cross	Sex	w+ eyes; WT	w+; twisted phenotype	Totals
1	♀	48	0	100		1	♀	0	0	0		1	♀	100	0	100
	♂	52	0				♂	0	0				♂	0	0
2	♀	49.4253	0	100		2	♀	0	0	0		2	♀	100	0	100
	♂	50.5747	0				♂	0	0				♂	0	0
3	♀	47.2222	0	100		3	♀	0	0	0		3	♀	100	0	100
	♂	52.7778	0				♂	0	0				♂	0	0
S4E. RAW Apterous data
F1 progeny:Counts	[WT](♂) x Apterous gRNA (♀)					F1 progeny:Counts	[Autosomal Cas9](♂) x Apterous gRNA (♀)					F1 progeny:Counts	[SGyA](♂) x Apterous gRNA (♀)
Cross	Sex	w+ eyes; WT	w+; deformed wing phenotype	Totals		Cross	Sex	w+ eyes; WT	w+; deformed wing phenotype	Totals		Cross	Sex	w+ eyes; WT	w+; deformed wing phenotype	Totals
1	♀	43	0	90		1	♀	9	21	59		1	♀	59	0	87
	♂	47	0				♂	14	15				♂	16	12
2	♀	25	0	48		2	♀	12	26	71		2	♀	36	0	63
	♂	23	0				♂	14	19				♂	15	12
3	♀	51	0	92		3	♀	10	23	59		3	♀	46	0	89
	♂	41	0				♂	11	15				♂	16	27
F1 progeny:Percentages	[WT](♂) x Apterous gRNA (♀)					F1 progeny:Percentages	[Autosomal Cas9](♂) x Apterous gRNA (♀)					F1 progeny:Percentages	[SGyA](♂) x Apterous gRNA (♀)
Cross	Sex	w+ eyes; WT	w+; twisted phenotype	Totals		Cross	Sex	w+ eyes; WT	w+; twisted phenotype	Totals		Cross	Sex	w+ eyes; WT	w+; twisted phenotype	Totals
1	♀	47.7778	0	100		1	♀	15.2542	35.5932	100		1	♀	67.8161	0	100
	♂	52.2222	0				♂	23.7288	25.4237				♂	18.3908	13.7931
2	♀	52.0833	0	100		2	♀	16.9014	36.6197	100		2	♀	57.1429	0	100
	♂	47.9167	0				♂	19.7183	26.7606				♂	23.8095	19.0476
3	♀	55.4348	0	100		3	♀	16.9492	38.9831	100		3	♀	51.6854	0	100
	♂	44.5652	0				♂	18.6441	25.4237				♂	17.9775	30.3371
S4F. RAW Scalloped data
F1 progeny:Counts	[WT](♂) x Scalloped gRNA (♀)					F1 progeny:Counts	[Autosomal Cas9](♂) x Scalloped gRNA (♀)					F1 progeny:Counts	[SGyA](♂) x Scalloped gRNA (♀)
Cross	Sex	w+ eyes; WT	w+; deformed wing phenotype	Totals		Cross	Sex	w+ eyes; WT	w+; deformed wing phenotype	Totals		Cross	Sex	w+ eyes; WT	w+; deformed wing phenotype	Totals
1	♀	51	0	95		1	♀	1	31	40		1	♀	44	0	47
	♂	44	0				♂	0	8				♂	0	3
2	♀	51	0	98		2	♀	1	38	50		2	♀	68	0	72
	♂	47	0				♂	0	11				♂	0	4
3	♀	44	0	83		3	♀	0	46	65		3	♀	57	0	64
	♂	39	0				♂	0	19				♂	0	7
F1 progeny:Percentages	[WT](♂) x Scalloped gRNA (♀)					F1 progeny:Percentages	[Autosomal Cas9](♂) x Scalloped gRNA (♀)					F1 progeny:Percentages	[SGyA](♂) x Scalloped gRNA (♀)
Cross	Sex	w+ eyes; WT	w+; twisted phenotype	Totals		Cross	Sex	w+ eyes; WT	w+; twisted phenotype	Totals		Cross	Sex	w+ eyes; WT	w+; twisted phenotype	Totals
1	♀	53.6842	0	100		1	♀	2.5	77.5	100		1	♀	93.617	0	100
	♂	46.3158	0				♂	0	20				♂	0	6.38298
2	♀	52.0408	0	100		2	♀	2	76	100		2	♀	94.4444	0	100
	♂	47.9592	0				♂	0	22				♂	0	5.55556
3	♀	53.012	0	100		3	♀	0	70.7692	100		3	♀	89.0625	0	100
	♂	46.988	0				♂	0	29.2308				♂	0	10.9375
